# Supplementary material
Source: publisher figshare collection journal article supplement (https://acs.figshare.com/ndownloader/files/5730738)
Supplement: Supplementary file 1 [file 5730738]

# ja021159+.cif

data_8c
 
_audit_creation_method            SHELXL-97
_chemical_name_systematic
;
 ?
;
_chemical_name_common             ?
_chemical_melting_point           ?
_chemical_formula_moiety          ?
_chemical_formula_sum
 'C39 H56 O4 Si2'
_chemical_formula_weight          645.02
 
loop_
 _atom_type_symbol
 _atom_type_description
 _atom_type_scat_dispersion_real
 _atom_type_scat_dispersion_imag
 _atom_type_scat_source
 'C'  'C'   0.0181   0.0091
 'International Tables Vol C Tables 4.2.6.8 and 6.1.1.4'
 'H'  'H'   0.0000   0.0000
 'International Tables Vol C Tables 4.2.6.8 and 6.1.1.4'
 'O'  'O'   0.0492   0.0322
 'International Tables Vol C Tables 4.2.6.8 and 6.1.1.4'
 'Si'  'Si'   0.2541   0.3302
 'International Tables Vol C Tables 4.2.6.8 and 6.1.1.4'
 
_symmetry_cell_setting            Triclinic
_symmetry_space_group_name_H-M    P-1
 
loop_
 _symmetry_equiv_pos_as_xyz
 'x, y, z'
 '-x, -y, -z'
 
_cell_length_a                    14.43580(10)
_cell_length_b                    16.47100(10)
_cell_length_c                    17.15210(10)
_cell_angle_alpha                 105.0370(10)
_cell_angle_beta                  102.0660(10)
_cell_angle_gamma                 95.0260(10)
_cell_volume                      3807.94(4)
_cell_formula_units_Z             4
_cell_measurement_temperature     293(2)
_cell_measurement_reflns_used     ?
_cell_measurement_theta_min       ?
_cell_measurement_theta_max       ?
 
_exptl_crystal_description        ?
_exptl_crystal_colour             ?
_exptl_crystal_size_max           ?
_exptl_crystal_size_mid           ?
_exptl_crystal_size_min           ?
_exptl_crystal_density_meas       ?
_exptl_crystal_density_diffrn     1.125
_exptl_crystal_density_method     'not measured'
_exptl_crystal_F_000              1400
_exptl_absorpt_coefficient_mu     1.124
_exptl_absorpt_correction_type    none
_exptl_absorpt_correction_T_min   ?
_exptl_absorpt_correction_T_max   ?
_exptl_absorpt_process_details    ?
 
_exptl_special_details
;
 ?
;
 
_diffrn_ambient_temperature       293(2)
_diffrn_radiation_wavelength      1.54178
_diffrn_radiation_type            CuK\a
_diffrn_radiation_source          'fine-focus sealed tube'
_diffrn_radiation_monochromator   graphite
_diffrn_measurement_device_type   'CCD area detector'
_diffrn_measurement_method        'phi and omega scans'
_diffrn_detector_area_resol_mean  ?
_diffrn_standards_number          ?
_diffrn_standards_interval_count  ?
_diffrn_standards_interval_time   ?
_diffrn_standards_decay_%         ?
_diffrn_reflns_number             23416
_diffrn_reflns_av_R_equivalents   0.0326
_diffrn_reflns_av_sigmaI/netI     0.0335
_diffrn_reflns_limit_h_min        -17
_diffrn_reflns_limit_h_max        17
_diffrn_reflns_limit_k_min        -19
_diffrn_reflns_limit_k_max        18
_diffrn_reflns_limit_l_min        -20
_diffrn_reflns_limit_l_max        20
_diffrn_reflns_theta_min          2.75
_diffrn_reflns_theta_max          67.14
_reflns_number_total              12291
_reflns_number_gt                 9867
_reflns_threshold_expression      >2sigma(I)
 
_computing_data_collection        'Bruker SMART'
_computing_cell_refinement        'Bruker SMART'
_computing_data_reduction         'Bruker SHELXTL'
_computing_structure_solution     'SHELXS-97 (Sheldrick, 1990)'
_computing_structure_refinement   'SHELXL-97 (Sheldrick, 1997)'
_computing_molecular_graphics     'Bruker SHELXTL'
_computing_publication_material   'Bruker SHELXTL'
 
_refine_special_details
;
 Refinement of F^2^ against ALL reflections.  The weighted R-factor wR and
 goodness of fit S are based on F^2^, conventional R-factors R are based
 on F, with F set to zero for negative F^2^. The threshold expression of
 F^2^ > 2sigma(F^2^) is used only for calculating R-factors(gt) etc. and is
 not relevant to the choice of reflections for refinement.  R-factors based
 on F^2^ are statistically about twice as large as those based on F, and R-
 factors based on ALL data will be even larger.
;
 
_refine_ls_structure_factor_coef  Fsqd
_refine_ls_matrix_type            full
_refine_ls_weighting_scheme       calc
_refine_ls_weighting_details
 'calc w=1/[\s^2^(Fo^2^)+(0.1825P)^2^+0.2589P] where P=(Fo^2^+2Fc^2^)/3'
_atom_sites_solution_primary      direct
_atom_sites_solution_secondary    difmap
_atom_sites_solution_hydrogens    geom
_refine_ls_hydrogen_treatment     mixed
_refine_ls_extinction_method      SHELXL
_refine_ls_extinction_coef        0.0069(5)
_refine_ls_extinction_expression
 'Fc^*^=kFc[1+0.001xFc^2^\l^3^/sin(2\q)]^-1/4^'
_refine_ls_number_reflns          12291
_refine_ls_number_parameters      840
_refine_ls_number_restraints      0
_refine_ls_R_factor_all           0.0735
_refine_ls_R_factor_gt            0.0657
_refine_ls_wR_factor_ref          0.2078
_refine_ls_wR_factor_gt           0.1948
_refine_ls_goodness_of_fit_ref    0.892
_refine_ls_restrained_S_all       0.892
_refine_ls_shift/su_max           0.169
_refine_ls_shift/su_mean          0.005
 
loop_
 _atom_site_label
 _atom_site_type_symbol
 _atom_site_fract_x
 _atom_site_fract_y
 _atom_site_fract_z
 _atom_site_U_iso_or_equiv
 _atom_site_adp_type
 _atom_site_occupancy
 _atom_site_symmetry_multiplicity
 _atom_site_calc_flag
 _atom_site_refinement_flags
 _atom_site_disorder_assembly
 _atom_site_disorder_group
C1 C 0.95579(15) 0.32953(12) 0.31758(12) 0.0514(4) Uani 1 1 d . . .
O1 O 0.87329(10) 0.30196(9) 0.34422(9) 0.0583(4) Uani 1 1 d . . .
C2 C 1.04700(15) 0.31180(13) 0.36782(12) 0.0532(5) Uani 1 1 d . . .
C3 C 1.09205(16) 0.24448(15) 0.37693(14) 0.0610(5) Uani 1 1 d . . .
C4 C 1.18579(18) 0.28237(19) 0.43913(18) 0.0755(7) Uani 1 1 d . . .
O4 O 1.24851(16) 0.24356(17) 0.4616(2) 0.1168(9) Uani 1 1 d . . .
C5 C 1.19157(18) 0.37848(17) 0.47077(15) 0.0712(6) Uani 1 1 d . . .
H5A H 1.1939 0.3965 0.5298 0.085 Uiso 1 1 calc R . .
H5B H 1.2472 0.4078 0.4607 0.085 Uiso 1 1 calc R . .
C6 C 1.10118(16) 0.39383(14) 0.42065(12) 0.0588(5) Uani 1 1 d . . .
C7 C 1.05806(17) 0.45964(13) 0.41242(12) 0.0586(5) Uani 1 1 d . . .
H7A H 1.0823 0.5159 0.4423 0.070 Uiso 1 1 calc R . .
C8 C 0.96497(16) 0.43139(13) 0.34855(12) 0.0534(5) Uani 1 1 d . . .
O8 O 0.88395(12) 0.44537(9) 0.38354(9) 0.0606(4) Uani 1 1 d . . .
C9 C 0.95649(16) 0.45377(13) 0.26798(12) 0.0546(5) Uani 1 1 d . . .
C10 C 0.95662(17) 0.50904(14) 0.22065(13) 0.0593(5) Uani 1 1 d . . .
C11 C 0.9354(2) 0.43210(15) 0.13984(14) 0.0710(6) Uani 1 1 d . . .
H11A H 0.8730 0.4262 0.1026 0.085 Uiso 1 1 calc R . .
H11B H 0.9859 0.4280 0.1102 0.085 Uiso 1 1 calc R . .
C12 C 0.93968(18) 0.37751(14) 0.20075(12) 0.0601(5) Uani 1 1 d . . .
C13 C 0.94009(17) 0.30624(14) 0.22347(12) 0.0584(5) Uani 1 1 d . . .
H13A H 0.9321 0.2515 0.1879 0.070 Uiso 1 1 calc R . .
C14 C 0.81725(17) 0.36876(15) 0.34617(14) 0.0607(5) Uani 1 1 d . . .
H14A H 0.7851 0.3670 0.2893 0.073 Uiso 1 1 calc R . .
C1' C 0.74457(18) 0.36547(17) 0.39643(15) 0.0697(6) Uani 1 1 d . . .
C2' C 0.6765(2) 0.4185(2) 0.3928(2) 0.0914(9) Uani 1 1 d . . .
H2'A H 0.6760 0.4535 0.3580 0.110 Uiso 1 1 calc R . .
C3' C 0.6096(2) 0.4214(3) 0.4386(3) 0.1174(14) Uani 1 1 d . . .
H3'A H 0.5655 0.4591 0.4356 0.141 Uiso 1 1 calc R . .
C4' C 0.6068(3) 0.3704(3) 0.4880(3) 0.1234(16) Uani 1 1 d . . .
O4' O 0.5395(3) 0.3723(3) 0.5334(3) 0.234(3) Uani 1 1 d . . .
C5' C 0.6706(5) 0.3146(3) 0.4908(3) 0.1425(19) Uani 1 1 d . . .
H5'A H 0.6676 0.2775 0.5232 0.171 Uiso 1 1 calc R . .
C6' C 0.7413(3) 0.3123(3) 0.4448(3) 0.1104(12) Uani 1 1 d . . .
H6'A H 0.7855 0.2747 0.4476 0.132 Uiso 1 1 calc R . .
C7' C 0.4800(5) 0.3327(5) 0.5355(5) 0.230(4) Uani 1 1 d . . .
H7'A H 0.4466 0.3643 0.5732 0.346 Uiso 1 1 calc R . .
H7'B H 0.5007 0.2857 0.5543 0.346 Uiso 1 1 calc R . .
H7'C H 0.4379 0.3117 0.4810 0.346 Uiso 1 1 calc R . .
Si1 Si 0.97538(5) 0.62693(4) 0.24152(4) 0.05922(19) Uani 1 1 d . . .
C1A C 1.0462(2) 0.67228(17) 0.35285(16) 0.0766(7) Uani 1 1 d . . .
H1AA H 1.0982 0.6386 0.3608 0.092 Uiso 1 1 calc R . .
C1B C 0.9876(3) 0.66477(19) 0.41670(18) 0.0939(9) Uani 1 1 d . . .
H1BA H 1.0276 0.6883 0.4719 0.141 Uiso 1 1 calc R . .
H1BB H 0.9645 0.6060 0.4084 0.141 Uiso 1 1 calc R . .
H1BC H 0.9343 0.6953 0.4096 0.141 Uiso 1 1 calc R . .
C1C C 1.0931(3) 0.7645(2) 0.3738(2) 0.1066(11) Uani 1 1 d . . .
H1CA H 1.1283 0.7834 0.4309 0.160 Uiso 1 1 calc R . .
H1CB H 1.0445 0.7996 0.3649 0.160 Uiso 1 1 calc R . .
H1CC H 1.1360 0.7686 0.3386 0.160 Uiso 1 1 calc R . .
C1D C 0.8535(2) 0.6613(2) 0.2183(2) 0.0863(8) Uani 1 1 d . . .
H1DA H 0.8268 0.6347 0.1587 0.104 Uiso 1 1 calc R . .
C1E C 0.7815(3) 0.6288(3) 0.2608(3) 0.1263(14) Uani 1 1 d . . .
H1EA H 0.7220 0.6490 0.2455 0.189 Uiso 1 1 calc R . .
H1EB H 0.8059 0.6490 0.3201 0.189 Uiso 1 1 calc R . .
H1EC H 0.7713 0.5677 0.2437 0.189 Uiso 1 1 calc R . .
C1F C 0.8573(3) 0.7563(3) 0.2300(3) 0.1229(14) Uani 1 1 d . . .
H1FA H 0.7933 0.7693 0.2169 0.184 Uiso 1 1 calc R . .
H1FB H 0.8928 0.7730 0.1938 0.184 Uiso 1 1 calc R . .
H1FC H 0.8881 0.7866 0.2867 0.184 Uiso 1 1 calc R . .
C1G C 1.0447(2) 0.65547(18) 0.16844(18) 0.0805(7) Uani 1 1 d . . .
H1GA H 1.0566 0.7177 0.1831 0.097 Uiso 1 1 calc R . .
C1H C 0.9877(4) 0.6238(2) 0.0773(2) 0.1168(14) Uani 1 1 d . . .
H1HA H 1.0258 0.6398 0.0425 0.175 Uiso 1 1 calc R . .
H1HB H 0.9300 0.6487 0.0710 0.175 Uiso 1 1 calc R . .
H1HC H 0.9718 0.5630 0.0613 0.175 Uiso 1 1 calc R . .
C1I C 1.1421(3) 0.6253(3) 0.1798(4) 0.1359(18) Uani 1 1 d . . .
H1IA H 1.1757 0.6414 0.1420 0.204 Uiso 1 1 calc R . .
H1IB H 1.1334 0.5646 0.1685 0.204 Uiso 1 1 calc R . .
H1IC H 1.1787 0.6511 0.2359 0.204 Uiso 1 1 calc R . .
Si2 Si 1.06194(5) 0.12554(4) 0.32967(4) 0.0655(2) Uani 1 1 d . . .
C2A C 0.9274(2) 0.09515(16) 0.28631(18) 0.0751(7) Uani 1 1 d . . .
H2AA H 0.9078 0.1337 0.2531 0.090 Uiso 1 1 calc R . .
C2B C 0.8717(2) 0.1090(2) 0.3541(2) 0.0936(9) Uani 1 1 d . . .
H2BA H 0.8044 0.0929 0.3290 0.140 Uiso 1 1 calc R . .
H2BB H 0.8842 0.1680 0.3855 0.140 Uiso 1 1 calc R . .
H2BC H 0.8916 0.0750 0.3905 0.140 Uiso 1 1 calc R . .
C2C C 0.8968(3) 0.0040(2) 0.2270(2) 0.1097(11) Uani 1 1 d . . .
H2CA H 0.8283 -0.0071 0.2074 0.165 Uiso 1 1 calc R . .
H2CB H 0.9177 -0.0361 0.2561 0.165 Uiso 1 1 calc R . .
H2CC H 0.9255 -0.0014 0.1805 0.165 Uiso 1 1 calc R . .
C2D C 1.1104(3) 0.07347(19) 0.4126(2) 0.0864(8) Uani 1 1 d . . .
H2DA H 1.1801 0.0891 0.4249 0.104 Uiso 1 1 calc R . .
C2E C 1.0944(4) -0.0204(2) 0.3842(3) 0.1199(13) Uani 1 1 d . . .
H2EA H 1.1218 -0.0421 0.4293 0.180 Uiso 1 1 calc R . .
H2EB H 1.1242 -0.0395 0.3390 0.180 Uiso 1 1 calc R . .
H2EC H 1.0269 -0.0406 0.3658 0.180 Uiso 1 1 calc R . .
C2F C 1.0849(3) 0.1080(2) 0.4960(2) 0.0960(9) Uani 1 1 d . . .
H2FA H 1.1133 0.0786 0.5343 0.144 Uiso 1 1 calc R . .
H2FB H 1.0166 0.0994 0.4881 0.144 Uiso 1 1 calc R . .
H2FC H 1.1089 0.1677 0.5179 0.144 Uiso 1 1 calc R . .
C2G C 1.1253(3) 0.0944(2) 0.2426(2) 0.0919(9) Uani 1 1 d . . .
H2GA H 1.1142 0.0321 0.2232 0.110 Uiso 1 1 calc R . .
C2H C 1.0829(4) 0.1251(3) 0.1675(3) 0.1292(16) Uani 1 1 d . . .
H2HA H 1.1170 0.1075 0.1251 0.194 Uiso 1 1 calc R . .
H2HB H 1.0888 0.1860 0.1844 0.194 Uiso 1 1 calc R . .
H2HC H 1.0165 0.1011 0.1462 0.194 Uiso 1 1 calc R . .
C2I C 1.2342(3) 0.1212(3) 0.2710(3) 0.1284(15) Uani 1 1 d . . .
H2IA H 1.2622 0.1031 0.2245 0.193 Uiso 1 1 calc R . .
H2IB H 1.2600 0.0953 0.3133 0.193 Uiso 1 1 calc R . .
H2IC H 1.2485 0.1819 0.2931 0.193 Uiso 1 1 calc R . .
C21 C 0.50702(16) 0.80619(13) -0.17161(13) 0.0561(5) Uani 1 1 d . . .
O21 O 0.42564(11) 0.77302(9) -0.14779(10) 0.0600(4) Uani 1 1 d . . .
C22 C 0.59893(15) 0.79860(14) -0.11484(13) 0.0557(5) Uani 1 1 d . . .
C23 C 0.64931(16) 0.73704(15) -0.09703(15) 0.0606(5) Uani 1 1 d . . .
C24 C 0.73767(18) 0.78355(19) -0.03123(18) 0.0755(7) Uani 1 1 d . . .
O24 O 0.80302(15) 0.75219(16) 0.00044(18) 0.1121(8) Uani 1 1 d . . .
C25 C 0.73449(18) 0.87847(18) -0.00827(16) 0.0725(6) Uani 1 1 d . . .
H25A H 0.7326 0.9003 0.0495 0.087 Uiso 1 1 calc R . .
H25B H 0.7894 0.9092 -0.0180 0.087 Uiso 1 1 calc R . .
C26 C 0.64331(16) 0.88474(15) -0.06543(13) 0.0594(5) Uani 1 1 d . . .
C27 C 0.59326(18) 0.94451(14) -0.08084(13) 0.0620(5) Uani 1 1 d . . .
H27A H 0.6109 1.0023 -0.0537 0.074 Uiso 1 1 calc R . .
C28 C 0.50389(17) 0.90623(13) -0.14824(13) 0.0572(5) Uani 1 1 d . . .
O28 O 0.41933(12) 0.91495(10) -0.11775(10) 0.0654(4) Uani 1 1 d . . .
C29 C 0.49921(18) 0.92389(15) -0.23099(14) 0.0642(6) Uani 1 1 d . . .
C30 C 0.4996(2) 0.97515(17) -0.28189(15) 0.0705(6) Uani 1 1 d . A .
C31 C 0.4964(3) 0.89535(18) -0.35737(16) 0.0885(9) Uani 1 1 d . . .
H31A H 0.4380 0.8819 -0.4012 0.106 Uiso 1 1 calc R . .
H31B H 0.5531 0.8951 -0.3795 0.106 Uiso 1 1 calc R . .
C32 C 0.4971(2) 0.84621(16) -0.29227(14) 0.0728(7) Uani 1 1 d . . .
C33 C 0.5014(2) 0.77828(15) -0.26457(14) 0.0688(6) Uani 1 1 d . . .
H33A H 0.5010 0.7231 -0.2964 0.083 Uiso 1 1 calc R . .
C34 C 0.36125(17) 0.83316(15) -0.14918(15) 0.0639(5) Uani 1 1 d . . .
H34A H 0.3248 0.8253 -0.2063 0.077 Uiso 1 1 calc R . .
C11' C 0.29418(16) 0.82602(15) -0.09453(15) 0.0639(5) Uani 1 1 d . . .
C12' C 0.23289(18) 0.88412(17) -0.08139(19) 0.0749(7) Uani 1 1 d . . .
H12A H 0.2331 0.9273 -0.1072 0.090 Uiso 1 1 calc R . .
C13' C 0.17002(19) 0.88033(18) -0.0304(2) 0.0806(7) Uani 1 1 d . . .
H13B H 0.1296 0.9210 -0.0218 0.097 Uiso 1 1 calc R . .
C14' C 0.16808(19) 0.81622(18) 0.00703(18) 0.0767(7) Uani 1 1 d . . .
O14' O 0.10873(17) 0.80538(16) 0.05733(16) 0.1031(7) Uani 1 1 d . . .
C15' C 0.2286(2) 0.7572(2) -0.0065(2) 0.0887(8) Uani 1 1 d . . .
H15A H 0.2276 0.7134 0.0184 0.106 Uiso 1 1 calc R . .
C16' C 0.2907(2) 0.7619(2) -0.05621(19) 0.0826(7) Uani 1 1 d . . .
H16A H 0.3312 0.7212 -0.0644 0.099 Uiso 1 1 calc R . .
C17' C 0.0368(3) 0.8552(3) 0.0655(3) 0.1308(15) Uani 1 1 d . . .
H17A H 0.0015 0.8393 0.1022 0.196 Uiso 1 1 calc R . .
H17B H -0.0055 0.8469 0.0120 0.196 Uiso 1 1 calc R . .
H17C H 0.0648 0.9140 0.0881 0.196 Uiso 1 1 calc R . .
Si1' Si 0.50575(5) 1.09095(5) -0.27399(5) 0.0712(2) Uani 1 1 d . . .
C11A C 0.6196(3) 1.1266(3) -0.3034(2) 0.1049(10) Uani 1 1 d . A .
H11C H 0.6210 1.1879 -0.2954 0.126 Uiso 1 1 calc R . .
C11B C 0.6208(5) 1.0911(5) -0.3922(4) 0.198(3) Uani 1 1 d . . .
H11D H 0.6804 1.1129 -0.4012 0.298 Uiso 1 1 calc R A .
H11E H 0.5687 1.1073 -0.4269 0.298 Uiso 1 1 calc R . .
H11F H 0.6141 1.0302 -0.4059 0.298 Uiso 1 1 calc R . .
C11C C 0.7091(3) 1.1190(3) -0.2427(3) 0.1307(15) Uani 1 1 d . . .
H11G H 0.7648 1.1377 -0.2594 0.196 Uiso 1 1 calc R A .
H11H H 0.7087 1.0608 -0.2424 0.196 Uiso 1 1 calc R . .
H11I H 0.7105 1.1537 -0.1879 0.196 Uiso 1 1 calc R . .
C11D C 0.3938(7) 1.0999(6) -0.3506(8) 0.147(5) Uani 0.775(10) 1 d P A 1
H12D H 0.4209 1.0840 -0.3993 0.176 Uiso 0.775(10) 1 calc PR A 1
C11E C 0.3862(6) 1.1907(5) -0.3548(6) 0.196(5) Uani 0.775(10) 1 d P A 1
H11T H 0.3290 1.1907 -0.3952 0.294 Uiso 0.775(10) 1 calc PR A 1
H11U H 0.4411 1.2127 -0.3705 0.294 Uiso 0.775(10) 1 calc PR A 1
H11V H 0.3836 1.2258 -0.3012 0.294 Uiso 0.775(10) 1 calc PR A 1
C11F C 0.3211(7) 1.0384(10) -0.3803(13) 0.300(13) Uani 0.775(10) 1 d P A 1
H11W H 0.2715 1.0546 -0.4175 0.451 Uiso 0.775(10) 1 calc PR A 1
H11X H 0.2969 1.0275 -0.3353 0.451 Uiso 0.775(10) 1 calc PR A 1
H11Y H 0.3414 0.9879 -0.4099 0.451 Uiso 0.775(10) 1 calc PR A 1
C11X C 0.416(2) 1.123(2) -0.3392(19) 0.095(8) Uani 0.225(10) 1 d P A 2
H12E H 0.4283 1.1838 -0.3345 0.115 Uiso 0.225(10) 1 calc PR A 2
C11J C 0.3867(19) 1.0629(18) -0.4367(11) 0.155(12) Uani 0.225(10) 1 d P A 2
H11Q H 0.3294 1.0779 -0.4659 0.233 Uiso 0.225(10) 1 calc PR A 2
H11R H 0.3757 1.0042 -0.4379 0.233 Uiso 0.225(10) 1 calc PR A 2
H11S H 0.4378 1.0718 -0.4629 0.233 Uiso 0.225(10) 1 calc PR A 2
C11K C 0.311(2) 1.095(3) -0.318(3) 0.181(16) Uani 0.225(10) 1 d P A 2
H11Z H 0.2593 1.1045 -0.3582 0.272 Uiso 0.225(10) 1 calc PR A 2
H12B H 0.3101 1.1280 -0.2634 0.272 Uiso 0.225(10) 1 calc PR A 2
H12C H 0.3041 1.0355 -0.3206 0.272 Uiso 0.225(10) 1 calc PR A 2
C11G C 0.5156(3) 1.1514(2) -0.1620(2) 0.0935(9) Uani 1 1 d . A .
H11P H 0.5712 1.1347 -0.1296 0.112 Uiso 1 1 calc R . .
C11H C 0.5393(4) 1.2488(2) -0.1446(3) 0.1221(13) Uani 1 1 d . . .
H11J H 0.5439 1.2761 -0.0870 0.183 Uiso 1 1 calc R A .
H11K H 0.4895 1.2685 -0.1784 0.183 Uiso 1 1 calc R . .
H11L H 0.5992 1.2622 -0.1578 0.183 Uiso 1 1 calc R . .
C11I C 0.4329(4) 1.1292(3) -0.1270(3) 0.1356(18) Uani 1 1 d . . .
H11M H 0.4443 1.1626 -0.0701 0.203 Uiso 1 1 calc R A .
H11N H 0.4264 1.0699 -0.1298 0.203 Uiso 1 1 calc R . .
H11O H 0.3751 1.1408 -0.1587 0.203 Uiso 1 1 calc R . .
Si2' Si 0.63101(5) 0.61652(4) -0.13709(5) 0.0655(2) Uani 1 1 d . . .
C21A C 0.5013(2) 0.57371(16) -0.19344(17) 0.0725(6) Uani 1 1 d . . .
H21H H 0.4817 0.6095 -0.2298 0.087 Uiso 1 1 calc R . .
C21B C 0.4339(2) 0.5810(2) -0.1352(2) 0.0858(8) Uani 1 1 d . . .
H21I H 0.3695 0.5587 -0.1671 0.129 Uiso 1 1 calc R . .
H21J H 0.4371 0.6397 -0.1056 0.129 Uiso 1 1 calc R . .
H21K H 0.4526 0.5493 -0.0963 0.129 Uiso 1 1 calc R . .
C21C C 0.4862(3) 0.4823(2) -0.2500(2) 0.1016(10) Uani 1 1 d . . .
H21L H 0.4194 0.4647 -0.2767 0.152 Uiso 1 1 calc R . .
H21M H 0.5076 0.4452 -0.2173 0.152 Uiso 1 1 calc R . .
H21N H 0.5223 0.4799 -0.2915 0.152 Uiso 1 1 calc R . .
C21D C 0.7087(2) 0.5850(2) -0.2124(2) 0.0920(9) Uani 1 1 d . . .
H21A H 0.6999 0.5228 -0.2302 0.110 Uiso 1 1 calc R . .
C21E C 0.6762(4) 0.6134(3) -0.2917(3) 0.1415(18) Uani 1 1 d . . .
H21B H 0.7168 0.5958 -0.3287 0.212 Uiso 1 1 calc R . .
H21C H 0.6803 0.6741 -0.2767 0.212 Uiso 1 1 calc R . .
H21D H 0.6111 0.5878 -0.3188 0.212 Uiso 1 1 calc R . .
C21F C 0.8155(3) 0.6150(3) -0.1748(4) 0.1360(17) Uani 1 1 d . . .
H21E H 0.8503 0.5962 -0.2165 0.204 Uiso 1 1 calc R . .
H21F H 0.8363 0.5916 -0.1295 0.204 Uiso 1 1 calc R . .
H21G H 0.8272 0.6759 -0.1548 0.204 Uiso 1 1 calc R . .
C21G C 0.6730(2) 0.5768(2) -0.0431(2) 0.0852(8) Uani 1 1 d . . .
H21O H 0.7422 0.5962 -0.0238 0.102 Uiso 1 1 calc R . .
C21H C 0.6310(3) 0.6133(2) 0.0301(2) 0.1017(10) Uani 1 1 d . . .
H21P H 0.6560 0.5904 0.0749 0.153 Uiso 1 1 calc R . .
H21Q H 0.5625 0.5986 0.0136 0.153 Uiso 1 1 calc R . .
H21R H 0.6479 0.6741 0.0481 0.153 Uiso 1 1 calc R . .
C21I C 0.6601(3) 0.4788(2) -0.0649(3) 0.1143(13) Uani 1 1 d . . .
H21S H 0.6829 0.4621 -0.0155 0.172 Uiso 1 1 calc R . .
H21T H 0.6959 0.4571 -0.1050 0.172 Uiso 1 1 calc R . .
H21U H 0.5935 0.4562 -0.0877 0.172 Uiso 1 1 calc R . .
 
loop_
 _atom_site_aniso_label
 _atom_site_aniso_U_11
 _atom_site_aniso_U_22
 _atom_site_aniso_U_33
 _atom_site_aniso_U_23
 _atom_site_aniso_U_13
 _atom_site_aniso_U_12
C1 0.0608(11) 0.0414(10) 0.0482(9) 0.0100(7) 0.0121(8) -0.0009(9)
O1 0.0612(8) 0.0503(8) 0.0617(8) 0.0169(6) 0.0143(6) -0.0023(7)
C2 0.0605(11) 0.0492(11) 0.0498(9) 0.0153(8) 0.0150(8) 0.0004(10)
C3 0.0628(12) 0.0567(13) 0.0655(12) 0.0227(10) 0.0154(10) 0.0036(10)
C4 0.0617(13) 0.0808(18) 0.0861(16) 0.0372(14) 0.0088(12) 0.0021(13)
O4 0.0753(12) 0.1007(18) 0.165(2) 0.0532(16) -0.0109(14) 0.0115(12)
C5 0.0665(13) 0.0732(16) 0.0673(13) 0.0233(11) 0.0053(11) -0.0073(12)
C6 0.0661(12) 0.0556(12) 0.0493(10) 0.0143(9) 0.0102(9) -0.0087(11)
C7 0.0768(13) 0.0457(11) 0.0470(10) 0.0093(8) 0.0130(9) -0.0070(11)
C8 0.0699(12) 0.0423(10) 0.0466(9) 0.0105(8) 0.0163(9) 0.0015(9)
O8 0.0743(9) 0.0498(8) 0.0574(8) 0.0100(6) 0.0245(7) 0.0031(7)
C9 0.0693(12) 0.0460(11) 0.0475(9) 0.0119(8) 0.0156(9) 0.0038(10)
C10 0.0749(13) 0.0530(12) 0.0525(10) 0.0164(9) 0.0201(9) 0.0077(11)
C11 0.1032(18) 0.0591(13) 0.0493(10) 0.0159(9) 0.0168(11) 0.0074(13)
C12 0.0801(14) 0.0506(12) 0.0460(9) 0.0107(8) 0.0137(9) 0.0046(11)
C13 0.0739(13) 0.0463(11) 0.0480(10) 0.0066(8) 0.0108(9) 0.0023(10)
C14 0.0666(12) 0.0552(12) 0.0578(11) 0.0138(9) 0.0139(10) 0.0057(11)
C1' 0.0655(13) 0.0672(15) 0.0680(13) 0.0097(11) 0.0163(11) -0.0048(12)
C2' 0.0692(15) 0.106(2) 0.0930(19) 0.0183(17) 0.0183(14) 0.0163(16)
C3' 0.0703(17) 0.147(4) 0.120(3) 0.006(3) 0.0333(19) 0.008(2)
C4' 0.094(2) 0.118(3) 0.134(3) -0.022(3) 0.062(2) -0.020(2)
O4' 0.172(3) 0.266(5) 0.215(4) -0.057(4) 0.144(3) -0.077(4)
C5' 0.202(5) 0.117(3) 0.127(3) 0.032(3) 0.100(4) -0.015(4)
C6' 0.132(3) 0.108(3) 0.122(3) 0.048(2) 0.075(2) 0.026(2)
C7' 0.187(6) 0.220(7) 0.248(8) -0.052(6) 0.164(6) -0.073(5)
Si1 0.0768(4) 0.0501(3) 0.0578(3) 0.0202(2) 0.0258(3) 0.0086(3)
C1A 0.1003(18) 0.0598(14) 0.0659(13) 0.0176(11) 0.0178(13) -0.0016(14)
C1B 0.142(3) 0.0692(17) 0.0715(15) 0.0134(13) 0.0413(17) 0.0054(18)
C1C 0.141(3) 0.0718(19) 0.091(2) 0.0182(15) 0.017(2) -0.023(2)
C1D 0.0908(18) 0.0813(19) 0.0928(18) 0.0254(15) 0.0284(15) 0.0265(16)
C1E 0.092(2) 0.129(3) 0.178(4) 0.058(3) 0.057(3) 0.019(2)
C1F 0.132(3) 0.099(3) 0.161(4) 0.049(3) 0.053(3) 0.056(2)
C1G 0.112(2) 0.0628(15) 0.0870(17) 0.0319(13) 0.0517(16) 0.0176(15)
C1H 0.195(4) 0.095(2) 0.0756(18) 0.0314(16) 0.061(2) 0.012(3)
C1I 0.138(3) 0.119(3) 0.203(5) 0.072(3) 0.114(4) 0.038(3)
Si2 0.0776(4) 0.0510(4) 0.0765(4) 0.0241(3) 0.0283(3) 0.0127(3)
C2A 0.0864(16) 0.0528(13) 0.0844(16) 0.0237(11) 0.0153(13) 0.0016(12)
C2B 0.0841(17) 0.084(2) 0.125(3) 0.0457(19) 0.0371(18) 0.0052(16)
C2C 0.128(3) 0.0627(18) 0.116(3) 0.0179(17) 0.000(2) -0.0076(19)
C2D 0.106(2) 0.0731(18) 0.099(2) 0.0415(15) 0.0355(17) 0.0346(16)
C2E 0.172(4) 0.080(2) 0.133(3) 0.052(2) 0.057(3) 0.039(2)
C2F 0.125(3) 0.090(2) 0.0887(19) 0.0420(16) 0.0330(18) 0.0297(19)
C2G 0.121(2) 0.0731(17) 0.104(2) 0.0342(15) 0.0585(19) 0.0287(17)
C2H 0.178(4) 0.145(4) 0.113(3) 0.066(3) 0.086(3) 0.066(3)
C2I 0.117(3) 0.129(3) 0.177(4) 0.060(3) 0.089(3) 0.037(3)
C21 0.0662(12) 0.0454(11) 0.0545(10) 0.0136(8) 0.0128(9) 0.0026(10)
O21 0.0601(8) 0.0488(8) 0.0690(8) 0.0186(6) 0.0116(7) 0.0016(7)
C22 0.0606(11) 0.0530(12) 0.0547(10) 0.0168(9) 0.0180(9) 0.0002(10)
C23 0.0574(11) 0.0594(13) 0.0705(12) 0.0259(10) 0.0195(10) 0.0053(10)
C24 0.0622(13) 0.0777(17) 0.0895(17) 0.0343(14) 0.0142(12) 0.0041(13)
O24 0.0706(11) 0.0955(16) 0.159(2) 0.0481(15) -0.0095(13) 0.0108(11)
C25 0.0655(13) 0.0732(16) 0.0716(14) 0.0211(12) 0.0068(11) -0.0049(12)
C26 0.0639(12) 0.0551(12) 0.0563(11) 0.0155(9) 0.0138(9) -0.0036(10)
C27 0.0770(13) 0.0480(11) 0.0553(11) 0.0118(9) 0.0128(10) -0.0038(11)
C28 0.0705(12) 0.0446(11) 0.0548(10) 0.0144(8) 0.0137(9) 0.0027(10)
O28 0.0765(10) 0.0498(8) 0.0718(9) 0.0171(7) 0.0226(8) 0.0087(8)
C29 0.0809(14) 0.0545(12) 0.0551(11) 0.0183(9) 0.0111(10) 0.0043(11)
C30 0.0888(16) 0.0634(14) 0.0601(12) 0.0231(10) 0.0145(11) 0.0073(13)
C31 0.137(3) 0.0681(16) 0.0599(13) 0.0246(12) 0.0175(15) 0.0100(17)
C32 0.1025(18) 0.0572(13) 0.0534(11) 0.0158(10) 0.0111(12) 0.0035(13)
C33 0.0936(17) 0.0530(13) 0.0527(11) 0.0092(9) 0.0125(11) 0.0049(12)
C34 0.0668(12) 0.0545(13) 0.0655(12) 0.0175(10) 0.0060(10) 0.0061(11)
C11' 0.0561(11) 0.0581(13) 0.0681(12) 0.0124(10) 0.0041(10) 0.0019(10)
C12' 0.0653(13) 0.0594(14) 0.0985(18) 0.0258(13) 0.0143(13) 0.0048(12)
C13' 0.0620(13) 0.0662(16) 0.107(2) 0.0152(14) 0.0196(13) 0.0076(12)
C14' 0.0693(14) 0.0690(16) 0.0855(16) 0.0154(13) 0.0174(12) -0.0006(13)
O14' 0.0941(14) 0.1078(17) 0.1207(17) 0.0362(14) 0.0504(13) 0.0155(13)
C15' 0.097(2) 0.086(2) 0.100(2) 0.0427(16) 0.0370(17) 0.0217(17)
C16' 0.0877(17) 0.0819(18) 0.0945(18) 0.0385(15) 0.0343(15) 0.0278(15)
C17' 0.112(3) 0.137(4) 0.167(4) 0.043(3) 0.078(3) 0.032(3)
Si1' 0.0814(4) 0.0638(4) 0.0800(4) 0.0366(3) 0.0229(3) 0.0145(3)
C11A 0.119(3) 0.097(2) 0.112(2) 0.039(2) 0.049(2) 0.008(2)
C11B 0.219(7) 0.257(8) 0.160(5) 0.088(5) 0.105(5) 0.016(6)
C11C 0.094(2) 0.141(4) 0.155(4) 0.035(3) 0.035(2) 0.013(2)
C11D 0.113(6) 0.114(8) 0.199(9) 0.097(7) -0.049(5) -0.011(5)
C11E 0.185(7) 0.149(7) 0.262(10) 0.131(7) -0.032(6) 0.052(5)
C11F 0.105(6) 0.266(18) 0.52(3) 0.23(2) -0.082(13) -0.002(9)
C11X 0.088(14) 0.076(13) 0.109(13) 0.020(9) 0.015(12) -0.017(11)
C11J 0.16(2) 0.18(3) 0.081(11) 0.009(12) -0.035(12) 0.056(18)
C11K 0.104(17) 0.21(4) 0.25(4) 0.07(3) 0.07(2) 0.01(2)
C11G 0.120(2) 0.0720(18) 0.100(2) 0.0274(15) 0.0424(19) 0.0283(18)
C11H 0.157(4) 0.071(2) 0.140(3) 0.019(2) 0.052(3) 0.021(2)
C11I 0.206(5) 0.093(3) 0.155(4) 0.050(3) 0.117(4) 0.046(3)
Si2' 0.0678(4) 0.0552(4) 0.0862(4) 0.0305(3) 0.0318(3) 0.0128(3)
C21A 0.0806(15) 0.0557(13) 0.0838(15) 0.0250(11) 0.0207(13) 0.0055(12)
C21B 0.0721(15) 0.0749(18) 0.120(2) 0.0378(16) 0.0332(15) 0.0085(14)
C21C 0.117(3) 0.0640(17) 0.111(2) 0.0104(16) 0.024(2) 0.0018(18)
C21D 0.106(2) 0.0724(17) 0.125(2) 0.0398(17) 0.067(2) 0.0272(16)
C21E 0.185(5) 0.153(4) 0.143(4) 0.072(3) 0.111(4) 0.056(4)
C21F 0.099(2) 0.129(3) 0.210(5) 0.056(3) 0.088(3) 0.030(2)
C21G 0.0771(15) 0.0804(19) 0.113(2) 0.0508(17) 0.0245(15) 0.0187(14)
C21H 0.119(2) 0.110(3) 0.090(2) 0.0506(19) 0.0269(19) 0.018(2)
C21I 0.133(3) 0.092(2) 0.156(3) 0.074(2) 0.059(3) 0.042(2)
 
_geom_special_details
;
 All esds (except the esd in the dihedral angle between two l.s. planes)
 are estimated using the full covariance matrix.  The cell esds are taken
 into account individually in the estimation of esds in distances, angles
 and torsion angles; correlations between esds in cell parameters are only
 used when they are defined by crystal symmetry.  An approximate (isotropic)
 treatment of cell esds is used for estimating esds involving l.s. planes.
;
 
loop_
 _geom_bond_atom_site_label_1
 _geom_bond_atom_site_label_2
 _geom_bond_distance
 _geom_bond_site_symmetry_2
 _geom_bond_publ_flag
C1 O1 1.440(3) . ?
C1 C2 1.512(3) . ?
C1 C13 1.521(3) . ?
C1 C8 1.607(3) . ?
O1 C14 1.419(3) . ?
C2 C3 1.360(3) . ?
C2 C6 1.463(3) . ?
C3 C4 1.504(3) . ?
C3 Si2 1.888(2) . ?
C4 O4 1.208(3) . ?
C4 C5 1.523(4) . ?
C5 C6 1.486(3) . ?
C6 C7 1.320(3) . ?
C7 C8 1.494(3) . ?
C8 O8 1.432(3) . ?
C8 C9 1.504(3) . ?
O8 C14 1.428(3) . ?
C9 C10 1.368(3) . ?
C9 C12 1.430(3) . ?
C10 C11 1.570(3) . ?
C10 Si1 1.865(2) . ?
C11 C12 1.541(3) . ?
C12 C13 1.330(3) . ?
C14 C1' 1.496(3) . ?
C1' C6' 1.357(4) . ?
C1' C2' 1.374(4) . ?
C2' C3' 1.362(5) . ?
C3' C4' 1.343(7) . ?
C4' C5' 1.360(7) . ?
C4' O4' 1.364(5) . ?
O4' C7' 1.046(6) . ?
C5' C6' 1.412(6) . ?
Si1 C1G 1.881(3) . ?
Si1 C1A 1.887(3) . ?
Si1 C1D 1.890(3) . ?
C1A C1C 1.527(4) . ?
C1A C1B 1.539(4) . ?
C1D C1F 1.520(5) . ?
C1D C1E 1.523(5) . ?
C1G C1I 1.524(5) . ?
C1G C1H 1.535(5) . ?
Si2 C2D 1.889(3) . ?
Si2 C2G 1.894(3) . ?
Si2 C2A 1.899(3) . ?
C2A C2B 1.529(4) . ?
C2A C2C 1.545(4) . ?
C2D C2E 1.477(5) . ?
C2D C2F 1.529(4) . ?
C2G C2I 1.533(6) . ?
C2G C2H 1.533(5) . ?
C21 O21 1.432(3) . ?
C21 C22 1.509(3) . ?
C21 C33 1.523(3) . ?
C21 C28 1.599(3) . ?
O21 C34 1.418(3) . ?
C22 C23 1.359(3) . ?
C22 C26 1.460(3) . ?
C23 C24 1.505(4) . ?
C23 Si2' 1.899(2) . ?
C24 O24 1.212(3) . ?
C24 C25 1.517(4) . ?
C25 C26 1.497(3) . ?
C26 C27 1.319(3) . ?
C27 C28 1.501(3) . ?
C28 O28 1.429(3) . ?
C28 C29 1.510(3) . ?
O28 C34 1.430(3) . ?
C29 C30 1.364(3) . ?
C29 C32 1.423(3) . ?
C30 C31 1.577(4) . ?
C30 Si1' 1.870(3) . ?
C31 C32 1.539(3) . ?
C32 C33 1.325(3) . ?
C34 C11' 1.499(4) . ?
C11' C12' 1.367(4) . ?
C11' C16' 1.384(4) . ?
C12' C13' 1.394(4) . ?
C13' C14' 1.372(4) . ?
C14' O14' 1.368(4) . ?
C14' C15' 1.371(4) . ?
O14' C17' 1.386(5) . ?
C15' C16' 1.369(4) . ?
Si1' C11X 1.74(4) . ?
Si1' C11G 1.890(3) . ?
Si1' C11D 1.901(8) . ?
Si1' C11A 1.905(4) . ?
C11A C11B 1.489(7) . ?
C11A C11C 1.518(6) . ?
C11D C11F 1.308(15) . ?
C11D C11E 1.528(11) . ?
C11X C11J 1.65(3) . ?
C11X C11K 1.69(4) . ?
C11G C11I 1.502(5) . ?
C11G C11H 1.548(5) . ?
Si2' C21D 1.886(3) . ?
Si2' C21A 1.896(3) . ?
Si2' C21G 1.898(3) . ?
C21A C21B 1.524(4) . ?
C21A C21C 1.533(4) . ?
C21D C21F 1.523(6) . ?
C21D C21E 1.544(6) . ?
C21G C21H 1.515(5) . ?
C21G C21I 1.545(5) . ?
 
loop_
 _geom_angle_atom_site_label_1
 _geom_angle_atom_site_label_2
 _geom_angle_atom_site_label_3
 _geom_angle
 _geom_angle_site_symmetry_1
 _geom_angle_site_symmetry_3
 _geom_angle_publ_flag
O1 C1 C2 111.42(16) . . ?
O1 C1 C13 113.32(17) . . ?
C2 C1 C13 118.30(18) . . ?
O1 C1 C8 102.81(15) . . ?
C2 C1 C8 103.15(16) . . ?
C13 C1 C8 105.86(16) . . ?
C14 O1 C1 104.76(15) . . ?
C3 C2 C6 113.4(2) . . ?
C3 C2 C1 139.3(2) . . ?
C6 C2 C1 107.26(18) . . ?
C2 C3 C4 105.4(2) . . ?
C2 C3 Si2 134.59(18) . . ?
C4 C3 Si2 120.00(18) . . ?
O4 C4 C3 126.0(3) . . ?
O4 C4 C5 123.9(2) . . ?
C3 C4 C5 110.2(2) . . ?
C6 C5 C4 102.35(19) . . ?
C7 C6 C2 114.0(2) . . ?
C7 C6 C5 137.5(2) . . ?
C2 C6 C5 108.5(2) . . ?
C6 C7 C8 110.71(18) . . ?
O8 C8 C7 112.69(16) . . ?
O8 C8 C9 113.49(18) . . ?
C7 C8 C9 118.34(18) . . ?
O8 C8 C1 103.57(15) . . ?
C7 C8 C1 104.89(17) . . ?
C9 C8 C1 101.56(15) . . ?
C14 O8 C8 105.31(15) . . ?
C10 C9 C12 96.50(17) . . ?
C10 C9 C8 154.1(2) . . ?
C12 C9 C8 109.41(18) . . ?
C9 C10 C11 90.13(17) . . ?
C9 C10 Si1 135.70(16) . . ?
C11 C10 Si1 134.17(16) . . ?
C12 C11 C10 84.30(16) . . ?
C13 C12 C9 114.77(19) . . ?
C13 C12 C11 156.1(2) . . ?
C9 C12 C11 89.04(17) . . ?
C12 C13 C1 108.31(18) . . ?
O1 C14 O8 105.31(17) . . ?
O1 C14 C1' 112.79(19) . . ?
O8 C14 C1' 109.45(18) . . ?
C6' C1' C2' 118.0(3) . . ?
C6' C1' C14 123.8(3) . . ?
C2' C1' C14 118.2(3) . . ?
C3' C2' C1' 121.9(4) . . ?
C4' C3' C2' 120.7(4) . . ?
C3' C4' C5' 119.2(4) . . ?
C3' C4' O4' 121.1(5) . . ?
C5' C4' O4' 119.7(6) . . ?
C7' O4' C4' 138.5(6) . . ?
C4' C5' C6' 120.5(4) . . ?
C1' C6' C5' 119.6(4) . . ?
C10 Si1 C1G 108.92(11) . . ?
C10 Si1 C1A 106.56(11) . . ?
C1G Si1 C1A 110.59(14) . . ?
C10 Si1 C1D 107.64(13) . . ?
C1G Si1 C1D 108.31(14) . . ?
C1A Si1 C1D 114.66(14) . . ?
C1C C1A C1B 108.8(3) . . ?
C1C C1A Si1 113.8(2) . . ?
C1B C1A Si1 113.4(2) . . ?
C1F C1D C1E 111.2(3) . . ?
C1F C1D Si1 113.8(3) . . ?
C1E C1D Si1 115.1(2) . . ?
C1I C1G C1H 111.4(3) . . ?
C1I C1G Si1 111.7(2) . . ?
C1H C1G Si1 112.5(2) . . ?
C3 Si2 C2D 107.98(13) . . ?
C3 Si2 C2G 108.06(13) . . ?
C2D Si2 C2G 108.60(14) . . ?
C3 Si2 C2A 109.47(11) . . ?
C2D Si2 C2A 112.91(14) . . ?
C2G Si2 C2A 109.69(15) . . ?
C2B C2A C2C 110.3(3) . . ?
C2B C2A Si2 112.9(2) . . ?
C2C C2A Si2 113.9(2) . . ?
C2E C2D C2F 112.2(3) . . ?
C2E C2D Si2 114.4(3) . . ?
C2F C2D Si2 115.3(2) . . ?
C2I C2G C2H 111.0(3) . . ?
C2I C2G Si2 113.4(3) . . ?
C2H C2G Si2 112.6(2) . . ?
O21 C21 C22 110.74(17) . . ?
O21 C21 C33 114.89(18) . . ?
C22 C21 C33 116.6(2) . . ?
O21 C21 C28 103.43(17) . . ?
C22 C21 C28 103.74(17) . . ?
C33 C21 C28 105.77(17) . . ?
C34 O21 C21 106.12(16) . . ?
C23 C22 C26 114.0(2) . . ?
C23 C22 C21 139.0(2) . . ?
C26 C22 C21 106.99(19) . . ?
C22 C23 C24 105.4(2) . . ?
C22 C23 Si2' 134.58(18) . . ?
C24 C23 Si2' 120.02(18) . . ?
O24 C24 C23 126.7(3) . . ?
O24 C24 C25 123.3(3) . . ?
C23 C24 C25 110.0(2) . . ?
C26 C25 C24 102.8(2) . . ?
C27 C26 C22 114.2(2) . . ?
C27 C26 C25 138.0(2) . . ?
C22 C26 C25 107.8(2) . . ?
C26 C27 C28 110.52(19) . . ?
O28 C28 C27 111.98(18) . . ?
O28 C28 C29 115.44(19) . . ?
C27 C28 C29 117.00(19) . . ?
O28 C28 C21 103.85(16) . . ?
C27 C28 C21 104.56(18) . . ?
C29 C28 C21 101.78(17) . . ?
C28 O28 C34 106.23(17) . . ?
C30 C29 C32 96.6(2) . . ?
C30 C29 C28 154.3(2) . . ?
C32 C29 C28 109.0(2) . . ?
C29 C30 C31 90.1(2) . . ?
C29 C30 Si1' 138.3(2) . . ?
C31 C30 Si1' 131.57(18) . . ?
C32 C31 C30 83.81(18) . . ?
C33 C32 C29 115.2(2) . . ?
C33 C32 C31 155.1(2) . . ?
C29 C32 C31 89.5(2) . . ?
C32 C33 C21 108.2(2) . . ?
O21 C34 O28 105.97(18) . . ?
O21 C34 C11' 111.28(19) . . ?
O28 C34 C11' 109.30(19) . . ?
C12' C11' C16' 117.5(3) . . ?
C12' C11' C34 119.9(2) . . ?
C16' C11' C34 122.6(2) . . ?
C11' C12' C13' 121.7(3) . . ?
C14' C13' C12' 119.6(3) . . ?
O14' C14' C15' 116.2(3) . . ?
O14' C14' C13' 124.8(3) . . ?
C15' C14' C13' 119.0(3) . . ?
C14' O14' C17' 119.9(3) . . ?
C16' C15' C14' 120.9(3) . . ?
C15' C16' C11' 121.2(3) . . ?
C11X Si1' C30 118.4(10) . . ?
C11X Si1' C11G 110.0(10) . . ?
C30 Si1' C11G 108.38(12) . . ?
C11X Si1' C11D 13.2(12) . . ?
C30 Si1' C11D 105.4(3) . . ?
C11G Si1' C11D 114.9(4) . . ?
C11X Si1' C11A 103.5(10) . . ?
C30 Si1' C11A 108.16(16) . . ?
C11G Si1' C11A 107.93(17) . . ?
C11D Si1' C11A 111.8(4) . . ?
C11B C11A C11C 113.7(5) . . ?
C11B C11A Si1' 115.4(4) . . ?
C11C C11A Si1' 111.9(3) . . ?
C11F C11D C11E 122.8(8) . . ?
C11F C11D Si1' 121.5(7) . . ?
C11E C11D Si1' 113.6(6) . . ?
C11J C11X Si1' 115(2) . . ?
C11J C11X C11K 95(2) . . ?
Si1' C11X C11K 108(2) . . ?
C11I C11G C11H 110.9(3) . . ?
C11I C11G Si1' 115.4(3) . . ?
C11H C11G Si1' 113.0(3) . . ?
C21D Si2' C21A 108.72(15) . . ?
C21D Si2' C21G 109.38(15) . . ?
C21A Si2' C21G 113.20(13) . . ?
C21D Si2' C23 108.49(12) . . ?
C21A Si2' C23 110.66(11) . . ?
C21G Si2' C23 106.28(13) . . ?
C21B C21A C21C 109.9(2) . . ?
C21B C21A Si2' 113.2(2) . . ?
C21C C21A Si2' 113.7(2) . . ?
C21F C21D C21E 110.3(3) . . ?
C21F C21D Si2' 114.2(3) . . ?
C21E C21D Si2' 111.9(2) . . ?
C21H C21G C21I 110.4(3) . . ?
C21H C21G Si2' 114.7(2) . . ?
C21I C21G Si2' 112.8(3) . . ?
 
loop_
 _geom_torsion_atom_site_label_1
 _geom_torsion_atom_site_label_2
 _geom_torsion_atom_site_label_3
 _geom_torsion_atom_site_label_4
 _geom_torsion
 _geom_torsion_site_symmetry_1
 _geom_torsion_site_symmetry_2
 _geom_torsion_site_symmetry_3
 _geom_torsion_site_symmetry_4
 _geom_torsion_publ_flag
C2 C1 O1 C14 137.00(17) . . . . ?
C13 C1 O1 C14 -86.6(2) . . . . ?
C8 C1 O1 C14 27.13(18) . . . . ?
O1 C1 C2 C3 71.4(3) . . . . ?
C13 C1 C2 C3 -62.6(3) . . . . ?
C8 C1 C2 C3 -179.0(3) . . . . ?
O1 C1 C2 C6 -109.75(18) . . . . ?
C13 C1 C2 C6 116.3(2) . . . . ?
C8 C1 C2 C6 -0.1(2) . . . . ?
C6 C2 C3 C4 -1.5(3) . . . . ?
C1 C2 C3 C4 177.3(2) . . . . ?
C6 C2 C3 Si2 179.38(18) . . . . ?
C1 C2 C3 Si2 -1.8(4) . . . . ?
C2 C3 C4 O4 -176.8(3) . . . . ?
Si2 C3 C4 O4 2.5(4) . . . . ?
C2 C3 C4 C5 3.1(3) . . . . ?
Si2 C3 C4 C5 -177.61(17) . . . . ?
O4 C4 C5 C6 176.5(3) . . . . ?
C3 C4 C5 C6 -3.4(3) . . . . ?
C3 C2 C6 C7 -179.90(19) . . . . ?
C1 C2 C6 C7 0.9(2) . . . . ?
C3 C2 C6 C5 -0.7(3) . . . . ?
C1 C2 C6 C5 -179.86(18) . . . . ?
C4 C5 C6 C7 -178.6(3) . . . . ?
C4 C5 C6 C2 2.5(2) . . . . ?
C2 C6 C7 C8 -1.4(3) . . . . ?
C5 C6 C7 C8 179.7(3) . . . . ?
C6 C7 C8 O8 113.2(2) . . . . ?
C6 C7 C8 C9 -111.1(2) . . . . ?
C6 C7 C8 C1 1.2(2) . . . . ?
O1 C1 C8 O8 -2.98(18) . . . . ?
C2 C1 C8 O8 -118.94(16) . . . . ?
C13 C1 C8 O8 116.13(17) . . . . ?
O1 C1 C8 C7 115.35(16) . . . . ?
C2 C1 C8 C7 -0.6(2) . . . . ?
C13 C1 C8 C7 -125.53(18) . . . . ?
O1 C1 C8 C9 -120.89(17) . . . . ?
C2 C1 C8 C9 123.16(17) . . . . ?
C13 C1 C8 C9 -1.8(2) . . . . ?
C7 C8 O8 C14 -134.95(18) . . . . ?
C9 C8 O8 C14 87.1(2) . . . . ?
C1 C8 O8 C14 -22.16(19) . . . . ?
O8 C8 C9 C10 73.4(5) . . . . ?
C7 C8 C9 C10 -62.0(6) . . . . ?
C1 C8 C9 C10 -176.1(5) . . . . ?
O8 C8 C9 C12 -107.7(2) . . . . ?
C7 C8 C9 C12 116.9(2) . . . . ?
C1 C8 C9 C12 2.8(2) . . . . ?
C12 C9 C10 C11 1.4(2) . . . . ?
C8 C9 C10 C11 -179.7(5) . . . . ?
C12 C9 C10 Si1 -178.0(2) . . . . ?
C8 C9 C10 Si1 1.0(7) . . . . ?
C9 C10 C11 C12 -1.26(19) . . . . ?
Si1 C10 C11 C12 178.1(2) . . . . ?
C10 C9 C12 C13 176.3(2) . . . . ?
C8 C9 C12 C13 -3.2(3) . . . . ?
C10 C9 C12 C11 -1.4(2) . . . . ?
C8 C9 C12 C11 179.1(2) . . . . ?
C10 C11 C12 C13 -173.7(6) . . . . ?
C10 C11 C12 C9 1.20(19) . . . . ?
C9 C12 C13 C1 1.9(3) . . . . ?
C11 C12 C13 C1 176.2(5) . . . . ?
O1 C1 C13 C12 112.0(2) . . . . ?
C2 C1 C13 C12 -114.9(2) . . . . ?
C8 C1 C13 C12 0.1(2) . . . . ?
C1 O1 C14 O8 -43.05(19) . . . . ?
C1 O1 C14 C1' -162.35(17) . . . . ?
C8 O8 C14 O1 41.0(2) . . . . ?
C8 O8 C14 C1' 162.51(18) . . . . ?
O1 C14 C1' C6' 9.0(4) . . . . ?
O8 C14 C1' C6' -107.9(3) . . . . ?
O1 C14 C1' C2' -170.2(2) . . . . ?
O8 C14 C1' C2' 72.9(3) . . . . ?
C6' C1' C2' C3' 2.8(5) . . . . ?
C14 C1' C2' C3' -177.9(3) . . . . ?
C1' C2' C3' C4' -1.5(6) . . . . ?
C2' C3' C4' C5' -1.1(7) . . . . ?
C2' C3' C4' O4' -179.4(4) . . . . ?
C3' C4' O4' C7' 112.8(13) . . . . ?
C5' C4' O4' C7' -65.4(14) . . . . ?
C3' C4' C5' C6' 2.4(7) . . . . ?
O4' C4' C5' C6' -179.3(4) . . . . ?
C2' C1' C6' C5' -1.5(6) . . . . ?
C14 C1' C6' C5' 179.3(3) . . . . ?
C4' C5' C6' C1' -1.1(7) . . . . ?
C9 C10 Si1 C1G 141.7(3) . . . . ?
C11 C10 Si1 C1G -37.3(3) . . . . ?
C9 C10 Si1 C1A 22.4(3) . . . . ?
C11 C10 Si1 C1A -156.7(3) . . . . ?
C9 C10 Si1 C1D -101.0(3) . . . . ?
C11 C10 Si1 C1D 79.9(3) . . . . ?
C10 Si1 C1A C1C 163.2(3) . . . . ?
C1G Si1 C1A C1C 45.0(3) . . . . ?
C1D Si1 C1A C1C -77.8(3) . . . . ?
C10 Si1 C1A C1B -71.7(2) . . . . ?
C1G Si1 C1A C1B 170.1(2) . . . . ?
C1D Si1 C1A C1B 47.3(2) . . . . ?
C10 Si1 C1D C1F -178.2(3) . . . . ?
C1G Si1 C1D C1F -60.6(3) . . . . ?
C1A Si1 C1D C1F 63.4(3) . . . . ?
C10 Si1 C1D C1E 51.7(3) . . . . ?
C1G Si1 C1D C1E 169.3(3) . . . . ?
C1A Si1 C1D C1E -66.7(3) . . . . ?
C10 Si1 C1G C1I -60.0(3) . . . . ?
C1A Si1 C1G C1I 56.8(3) . . . . ?
C1D Si1 C1G C1I -176.8(3) . . . . ?
C10 Si1 C1G C1H 66.2(3) . . . . ?
C1A Si1 C1G C1H -177.1(2) . . . . ?
C1D Si1 C1G C1H -50.6(3) . . . . ?
C2 C3 Si2 C2D -144.4(2) . . . . ?
C4 C3 Si2 C2D 36.6(2) . . . . ?
C2 C3 Si2 C2G 98.3(3) . . . . ?
C4 C3 Si2 C2G -80.7(2) . . . . ?
C2 C3 Si2 C2A -21.1(3) . . . . ?
C4 C3 Si2 C2A 159.86(19) . . . . ?
C3 Si2 C2A C2B -68.1(2) . . . . ?
C2D Si2 C2A C2B 52.2(2) . . . . ?
C2G Si2 C2A C2B 173.5(2) . . . . ?
C3 Si2 C2A C2C 165.2(2) . . . . ?
C2D Si2 C2A C2C -74.5(3) . . . . ?
C2G Si2 C2A C2C 46.8(3) . . . . ?
C3 Si2 C2D C2E -178.5(3) . . . . ?
C2G Si2 C2D C2E -61.6(3) . . . . ?
C2A Si2 C2D C2E 60.3(3) . . . . ?
C3 Si2 C2D C2F 49.2(3) . . . . ?
C2G Si2 C2D C2F 166.1(3) . . . . ?
C2A Si2 C2D C2F -72.0(3) . . . . ?
C3 Si2 C2G C2I 57.4(3) . . . . ?
C2D Si2 C2G C2I -59.5(3) . . . . ?
C2A Si2 C2G C2I 176.7(2) . . . . ?
C3 Si2 C2G C2H -69.7(3) . . . . ?
C2D Si2 C2G C2H 173.4(3) . . . . ?
C2A Si2 C2G C2H 49.6(3) . . . . ?
C22 C21 O21 C34 134.65(18) . . . . ?
C33 C21 O21 C34 -90.7(2) . . . . ?
C28 C21 O21 C34 24.07(19) . . . . ?
O21 C21 C22 C23 68.4(3) . . . . ?
C33 C21 C22 C23 -65.4(4) . . . . ?
C28 C21 C22 C23 178.8(3) . . . . ?
O21 C21 C22 C26 -110.86(19) . . . . ?
C33 C21 C22 C26 115.3(2) . . . . ?
C28 C21 C22 C26 -0.5(2) . . . . ?
C26 C22 C23 C24 -1.5(3) . . . . ?
C21 C22 C23 C24 179.3(3) . . . . ?
C26 C22 C23 Si2' 179.54(18) . . . . ?
C21 C22 C23 Si2' 0.3(4) . . . . ?
C22 C23 C24 O24 -178.0(3) . . . . ?
Si2' C23 C24 O24 1.2(4) . . . . ?
C22 C23 C24 C25 2.2(3) . . . . ?
Si2' C23 C24 C25 -178.60(17) . . . . ?
O24 C24 C25 C26 178.1(3) . . . . ?
C23 C24 C25 C26 -2.1(3) . . . . ?
C23 C22 C26 C27 -178.2(2) . . . . ?
C21 C22 C26 C27 1.3(3) . . . . ?
C23 C22 C26 C25 0.2(3) . . . . ?
C21 C22 C26 C25 179.67(18) . . . . ?
C24 C25 C26 C27 178.9(3) . . . . ?
C24 C25 C26 C22 1.2(3) . . . . ?
C22 C26 C27 C28 -1.6(3) . . . . ?
C25 C26 C27 C28 -179.3(3) . . . . ?
C26 C27 C28 O28 113.0(2) . . . . ?
C26 C27 C28 C29 -110.5(2) . . . . ?
C26 C27 C28 C21 1.2(2) . . . . ?
O21 C21 C28 O28 -2.24(19) . . . . ?
C22 C21 C28 O28 -117.91(17) . . . . ?
C33 C21 C28 O28 118.90(19) . . . . ?
O21 C21 C28 C27 115.31(18) . . . . ?
C22 C21 C28 C27 -0.4(2) . . . . ?
C33 C21 C28 C27 -123.6(2) . . . . ?
O21 C21 C28 C29 -122.46(18) . . . . ?
C22 C21 C28 C29 121.87(19) . . . . ?
C33 C21 C28 C29 -1.3(2) . . . . ?
C27 C28 O28 C34 -132.48(18) . . . . ?
C29 C28 O28 C34 90.3(2) . . . . ?
C21 C28 O28 C34 -20.2(2) . . . . ?
O28 C28 C29 C30 75.1(6) . . . . ?
C27 C28 C29 C30 -60.0(6) . . . . ?
C21 C28 C29 C30 -173.2(5) . . . . ?
O28 C28 C29 C32 -110.2(2) . . . . ?
C27 C28 C29 C32 114.7(2) . . . . ?
C21 C28 C29 C32 1.5(3) . . . . ?
C32 C29 C30 C31 0.5(3) . . . . ?
C28 C29 C30 C31 175.4(5) . . . . ?
C32 C29 C30 Si1' -177.5(3) . . . . ?
C28 C29 C30 Si1' -2.6(8) . . . . ?
C29 C30 C31 C32 -0.4(2) . . . . ?
Si1' C30 C31 C32 177.8(2) . . . . ?
C30 C29 C32 C33 176.5(3) . . . . ?
C28 C29 C32 C33 -1.2(4) . . . . ?
C30 C29 C32 C31 -0.5(3) . . . . ?
C28 C29 C32 C31 -178.1(2) . . . . ?
C30 C31 C32 C33 -173.0(7) . . . . ?
C30 C31 C32 C29 0.4(2) . . . . ?
C29 C32 C33 C21 0.2(4) . . . . ?
C31 C32 C33 C21 173.0(6) . . . . ?
O21 C21 C33 C32 114.1(2) . . . . ?
C22 C21 C33 C32 -113.9(3) . . . . ?
C28 C21 C33 C32 0.7(3) . . . . ?
C21 O21 C34 O28 -38.3(2) . . . . ?
C21 O21 C34 C11' -157.00(18) . . . . ?
C28 O28 C34 O21 36.7(2) . . . . ?
C28 O28 C34 C11' 156.69(17) . . . . ?
O21 C34 C11' C12' 173.7(2) . . . . ?
O28 C34 C11' C12' 57.0(3) . . . . ?
O21 C34 C11' C16' -6.7(3) . . . . ?
O28 C34 C11' C16' -123.4(3) . . . . ?
C16' C11' C12' C13' 1.0(4) . . . . ?
C34 C11' C12' C13' -179.4(2) . . . . ?
C11' C12' C13' C14' -0.9(4) . . . . ?
C12' C13' C14' O14' -179.1(3) . . . . ?
C12' C13' C14' C15' 0.2(4) . . . . ?
C15' C14' O14' C17' -171.6(4) . . . . ?
C13' C14' O14' C17' 7.8(5) . . . . ?
O14' C14' C15' C16' 179.7(3) . . . . ?
C13' C14' C15' C16' 0.3(5) . . . . ?
C14' C15' C16' C11' -0.2(5) . . . . ?
C12' C11' C16' C15' -0.5(4) . . . . ?
C34 C11' C16' C15' 179.9(3) . . . . ?
C29 C30 Si1' C11X -125.1(11) . . . . ?
C31 C30 Si1' C11X 57.6(11) . . . . ?
C29 C30 Si1' C11G 0.9(4) . . . . ?
C31 C30 Si1' C11G -176.3(3) . . . . ?
C29 C30 Si1' C11D -122.6(5) . . . . ?
C31 C30 Si1' C11D 60.1(5) . . . . ?
C29 C30 Si1' C11A 117.7(3) . . . . ?
C31 C30 Si1' C11A -59.5(3) . . . . ?
C11X Si1' C11A C11B -58.3(11) . . . . ?
C30 Si1' C11A C11B 68.1(4) . . . . ?
C11G Si1' C11A C11B -174.8(4) . . . . ?
C11D Si1' C11A C11B -47.5(6) . . . . ?
C11X Si1' C11A C11C 169.6(11) . . . . ?
C30 Si1' C11A C11C -64.0(3) . . . . ?
C11G Si1' C11A C11C 53.1(3) . . . . ?
C11D Si1' C11A C11C -179.6(5) . . . . ?
C11X Si1' C11D C11F -173(6) . . . . ?
C30 Si1' C11D C11F 16.8(17) . . . . ?
C11G Si1' C11D C11F -102.5(16) . . . . ?
C11A Si1' C11D C11F 134.1(16) . . . . ?
C11X Si1' C11D C11E -9(5) . . . . ?
C30 Si1' C11D C11E -178.9(7) . . . . ?
C11G Si1' C11D C11E 61.8(9) . . . . ?
C11A Si1' C11D C11E -61.7(9) . . . . ?
C30 Si1' C11X C11J -44(2) . . . . ?
C11G Si1' C11X C11J -169.2(18) . . . . ?
C11D Si1' C11X C11J -55(5) . . . . ?
C11A Si1' C11X C11J 76(2) . . . . ?
C30 Si1' C11X C11K 61(2) . . . . ?
C11G Si1' C11X C11K -65(2) . . . . ?
C11D Si1' C11X C11K 50(5) . . . . ?
C11A Si1' C11X C11K -179.8(19) . . . . ?
C11X Si1' C11G C11I 69.6(11) . . . . ?
C30 Si1' C11G C11I -61.2(3) . . . . ?
C11D Si1' C11G C11I 56.4(4) . . . . ?
C11A Si1' C11G C11I -178.1(3) . . . . ?
C11X Si1' C11G C11H -59.4(11) . . . . ?
C30 Si1' C11G C11H 169.7(3) . . . . ?
C11D Si1' C11G C11H -72.7(4) . . . . ?
C11A Si1' C11G C11H 52.8(3) . . . . ?
C22 C23 Si2' C21D 101.2(3) . . . . ?
C24 C23 Si2' C21D -77.7(2) . . . . ?
C22 C23 Si2' C21A -18.0(3) . . . . ?
C24 C23 Si2' C21A 163.12(19) . . . . ?
C22 C23 Si2' C21G -141.3(2) . . . . ?
C24 C23 Si2' C21G 39.8(2) . . . . ?
C21D Si2' C21A C21B 169.34(19) . . . . ?
C21G Si2' C21A C21B 47.6(2) . . . . ?
C23 Si2' C21A C21B -71.6(2) . . . . ?
C21D Si2' C21A C21C 43.0(3) . . . . ?
C21G Si2' C21A C21C -78.8(3) . . . . ?
C23 Si2' C21A C21C 162.0(2) . . . . ?
C21A Si2' C21D C21F -179.5(3) . . . . ?
C21G Si2' C21D C21F -55.4(3) . . . . ?
C23 Si2' C21D C21F 60.1(3) . . . . ?
C21A Si2' C21D C21E 54.3(3) . . . . ?
C21G Si2' C21D C21E 178.3(3) . . . . ?
C23 Si2' C21D C21E -66.1(3) . . . . ?
C21D Si2' C21G C21H 167.6(3) . . . . ?
C21A Si2' C21G C21H -71.0(3) . . . . ?
C23 Si2' C21G C21H 50.7(3) . . . . ?
C21D Si2' C21G C21I -64.7(3) . . . . ?
C21A Si2' C21G C21I 56.7(3) . . . . ?
C23 Si2' C21G C21I 178.3(2) . . . . ?
 
_diffrn_measured_fraction_theta_max    0.902
_diffrn_reflns_theta_full              67.14
_diffrn_measured_fraction_theta_full   0.902
_refine_diff_density_max    0.491
_refine_diff_density_min   -0.546
_refine_diff_density_rms    0.070

#===END

data_9c
 
_audit_creation_method            SHELXL-97
_chemical_name_systematic
;
 ?
;
_chemical_name_common             ?
_chemical_melting_point           ?
_chemical_formula_moiety          ?
_chemical_formula_sum
 'C42 H56 O5 Si2'
_chemical_formula_weight          697.05
 
loop_
 _atom_type_symbol
 _atom_type_description
 _atom_type_scat_dispersion_real
 _atom_type_scat_dispersion_imag
 _atom_type_scat_source
 'C'  'C'   0.0033   0.0016
 'International Tables Vol C Tables 4.2.6.8 and 6.1.1.4'
 'H'  'H'   0.0000   0.0000
 'International Tables Vol C Tables 4.2.6.8 and 6.1.1.4'
 'O'  'O'   0.0106   0.0060
 'International Tables Vol C Tables 4.2.6.8 and 6.1.1.4'
 'Si'  'Si'   0.0817   0.0704
 'International Tables Vol C Tables 4.2.6.8 and 6.1.1.4'
 
_symmetry_cell_setting            Monoclinic
_symmetry_space_group_name_H-M    P2(1)/c
 
loop_
 _symmetry_equiv_pos_as_xyz
 'x, y, z'
 '-x, y+1/2, -z+1/2'
 '-x, -y, -z'
 'x, -y-1/2, z-1/2'
 
_cell_length_a                    14.89360(10)
_cell_length_b                    19.11160(10)
_cell_length_c                    16.22800(10)
_cell_angle_alpha                 90.00
_cell_angle_beta                  111.94
_cell_angle_gamma                 90.00
_cell_volume                      4284.67(5)
_cell_formula_units_Z             4
_cell_measurement_temperature     293(2)
_cell_measurement_reflns_used     ?
_cell_measurement_theta_min       ?
_cell_measurement_theta_max       ?
 
_exptl_crystal_description        ?
_exptl_crystal_colour             ?
_exptl_crystal_size_max           ?
_exptl_crystal_size_mid           ?
_exptl_crystal_size_min           ?
_exptl_crystal_density_meas       ?
_exptl_crystal_density_diffrn     1.081
_exptl_crystal_density_method     'not measured'
_exptl_crystal_F_000              1504
_exptl_absorpt_coefficient_mu     0.121
_exptl_absorpt_correction_type    none
_exptl_absorpt_correction_T_min   ?
_exptl_absorpt_correction_T_max   ?
_exptl_absorpt_process_details    ?
 
_exptl_special_details
;
 ?
;
 
_diffrn_ambient_temperature       293(2)
_diffrn_radiation_wavelength      0.71073
_diffrn_radiation_type            MoK\a
_diffrn_radiation_source          'fine-focus sealed tube'
_diffrn_radiation_monochromator   graphite
_diffrn_measurement_device_type   'CCD area detector'
_diffrn_measurement_method        'phi and omega scans'
_diffrn_detector_area_resol_mean  ?
_diffrn_standards_number          ?
_diffrn_standards_interval_count  ?
_diffrn_standards_interval_time   ?
_diffrn_standards_decay_%         ?
_diffrn_reflns_number             22538
_diffrn_reflns_av_R_equivalents   0.0227
_diffrn_reflns_av_sigmaI/netI     0.0171
_diffrn_reflns_limit_h_min        -17
_diffrn_reflns_limit_h_max        15
_diffrn_reflns_limit_k_min        -22
_diffrn_reflns_limit_k_max        19
_diffrn_reflns_limit_l_min        -17
_diffrn_reflns_limit_l_max        19
_diffrn_reflns_theta_min          1.47
_diffrn_reflns_theta_max          25.15
_reflns_number_total              7343
_reflns_number_gt                 6848
_reflns_threshold_expression      >2sigma(I)
 
_computing_data_collection        'Bruker SMART'
_computing_cell_refinement        'Bruker SMART'
_computing_data_reduction         'Bruker SHELXTL'
_computing_structure_solution     'SHELXS-97 (Sheldrick, 1990)'
_computing_structure_refinement   'SHELXL-97 (Sheldrick, 1997)'
_computing_molecular_graphics     'Bruker SHELXTL'
_computing_publication_material   'Bruker SHELXTL'
 
_refine_special_details
;
 Refinement of F^2^ against ALL reflections.  The weighted R-factor wR and
 goodness of fit S are based on F^2^, conventional R-factors R are based
 on F, with F set to zero for negative F^2^. The threshold expression of
 F^2^ > 2sigma(F^2^) is used only for calculating R-factors(gt) etc. and is
 not relevant to the choice of reflections for refinement.  R-factors based
 on F^2^ are statistically about twice as large as those based on F, and R-
 factors based on ALL data will be even larger.
;
 
_refine_ls_structure_factor_coef  Fsqd
_refine_ls_matrix_type            full
_refine_ls_weighting_scheme       calc
_refine_ls_weighting_details
 'calc w=1/[\s^2^(Fo^2^)+(0.1170P)^2^+0.9789P] where P=(Fo^2^+2Fc^2^)/3'
_atom_sites_solution_primary      direct
_atom_sites_solution_secondary    difmap
_atom_sites_solution_hydrogens    geom
_refine_ls_hydrogen_treatment     mixed
_refine_ls_extinction_method      SHELXL
_refine_ls_extinction_coef        0.087(3)
_refine_ls_extinction_expression
 'Fc^*^=kFc[1+0.001xFc^2^\l^3^/sin(2\q)]^-1/4^'
_refine_ls_number_reflns          7343
_refine_ls_number_parameters      668
_refine_ls_number_restraints      2
_refine_ls_R_factor_all           0.0647
_refine_ls_R_factor_gt            0.0628
_refine_ls_wR_factor_ref          0.1911
_refine_ls_wR_factor_gt           0.1884
_refine_ls_goodness_of_fit_ref    1.086
_refine_ls_restrained_S_all       1.086
_refine_ls_shift/su_max           0.366
_refine_ls_shift/su_mean          0.025
 
loop_
 _atom_site_label
 _atom_site_type_symbol
 _atom_site_fract_x
 _atom_site_fract_y
 _atom_site_fract_z
 _atom_site_U_iso_or_equiv
 _atom_site_adp_type
 _atom_site_occupancy
 _atom_site_symmetry_multiplicity
 _atom_site_calc_flag
 _atom_site_refinement_flags
 _atom_site_disorder_assembly
 _atom_site_disorder_group
C1 C 0.58502(12) 0.76740(10) 0.34669(12) 0.0566(4) Uani 1 1 d . A .
O1 O 0.56078(9) 0.81366(7) 0.40483(9) 0.0626(3) Uani 1 1 d . . .
C2 C 0.56953(13) 0.69187(10) 0.36560(12) 0.0556(4) Uani 1 1 d . . .
C3 C 0.49564(13) 0.64805(10) 0.35873(12) 0.0580(4) Uani 1 1 d . A .
C4 C 0.54183(15) 0.57775(11) 0.39005(14) 0.0669(5) Uani 1 1 d . . .
O4 O 0.49848(13) 0.52344(8) 0.38723(13) 0.0898(5) Uani 1 1 d . A .
C5 C 0.65178(15) 0.58472(11) 0.42395(14) 0.0677(5) Uani 1 1 d . A .
H5A H 0.6810 0.5762 0.4874 0.081 Uiso 1 1 calc R . .
H5B H 0.6794 0.5527 0.3935 0.081 Uiso 1 1 calc R . .
C7 C 0.73671(13) 0.70257(11) 0.40883(13) 0.0627(5) Uani 1 1 d . . .
H7A H 0.8018 0.6902 0.4295 0.075 Uiso 1 1 calc R A .
C8 C 0.69863(12) 0.77500(10) 0.37819(12) 0.0573(4) Uani 1 1 d . A .
O8 O 0.72347(9) 0.82294(7) 0.45135(9) 0.0634(3) Uani 1 1 d . . .
C9 C 0.71405(13) 0.80739(10) 0.29911(12) 0.0591(4) Uani 1 1 d . . .
C10 C 0.78720(14) 0.83132(11) 0.27610(13) 0.0626(5) Uani 1 1 d . A .
C11 C 0.74000(17) 0.85796(16) 0.18285(15) 0.0809(6) Uani 1 1 d . . .
O11 O 0.78130(14) 0.88335(16) 0.13806(12) 0.1251(9) Uani 1 1 d . A .
C12 C 0.63015(16) 0.84947(14) 0.15068(15) 0.0778(6) Uani 1 1 d . A .
H12A H 0.5976 0.8944 0.1378 0.093 Uiso 1 1 calc R . .
H12B H 0.6057 0.8201 0.0982 0.093 Uiso 1 1 calc R . .
C13 C 0.61853(14) 0.81513(11) 0.22875(13) 0.0641(5) Uani 1 1 d . A .
C14 C 0.54728(13) 0.79246(11) 0.25220(13) 0.0633(5) Uani 1 1 d . . .
H14A H 0.4823 0.7921 0.2149 0.076 Uiso 1 1 calc R A .
C15 C 0.6365(2) 0.86413(15) 0.43400(19) 0.0664(7) Uani 0.743(3) 1 d P A 1
H15A H 0.6289 0.8989 0.3875 0.080 Uiso 0.743(3) 1 calc PR A 1
C1' C 0.63542(19) 0.89838(11) 0.51583(13) 0.0693(9) Uani 0.743(3) 1 d PG A 1
C2' C 0.6482(2) 0.85785(9) 0.59049(16) 0.1068(16) Uani 0.743(3) 1 d PG A 1
H2'A H 0.6613 0.8103 0.5902 0.128 Uiso 0.743(3) 1 calc PR A 1
C3' C 0.6412(3) 0.88838(12) 0.66564(15) 0.1197(17) Uani 0.743(3) 1 d PG A 1
H3'A H 0.6498 0.8613 0.7156 0.144 Uiso 0.743(3) 1 calc PR A 1
C4' C 0.6216(3) 0.95945(12) 0.66613(15) 0.0725(9) Uani 0.743(3) 1 d PG A 1
C5' C 0.6089(3) 0.99998(9) 0.59147(17) 0.1172(16) Uani 0.743(3) 1 d PG A 1
H5'A H 0.5957 1.0475 0.5918 0.141 Uiso 0.743(3) 1 calc PR A 1
C6' C 0.6158(3) 0.96944(11) 0.51632(14) 0.1106(14) Uani 0.743(3) 1 d PG A 1
H6'A H 0.6072 0.9966 0.4664 0.133 Uiso 0.743(3) 1 calc PR A 1
O4' O 0.6149(2) 0.98777(13) 0.74088(16) 0.1055(9) Uani 0.743(3) 1 d P A 1
C7' C 0.5969(5) 1.0587(3) 0.7475(4) 0.115(2) Uani 0.743(3) 1 d P A 1
H7'A H 0.5786 1.0662 0.7976 0.172 Uiso 0.743(3) 1 calc PR A 1
H7'B H 0.5453 1.0737 0.6942 0.172 Uiso 0.743(3) 1 calc PR A 1
H7'C H 0.6543 1.0851 0.7551 0.172 Uiso 0.743(3) 1 calc PR A 1
C15A C 0.6535(5) 0.8134(4) 0.4884(4) 0.0536(16) Uani 0.257(3) 1 d P A 2
H15B H 0.6623 0.7695 0.5218 0.064 Uiso 0.257(3) 1 calc PR A 2
C1'A C 0.6528(5) 0.8767(3) 0.5439(4) 0.057(2) Uani 0.257(3) 1 d PG A 2
C2'A C 0.6747(6) 0.9438(4) 0.5241(5) 0.094(3) Uani 0.257(3) 1 d PG A 2
H2'B H 0.6915 0.9512 0.4750 0.113 Uiso 0.257(3) 1 calc PR A 2
C3'A C 0.6715(7) 0.9998(3) 0.5775(7) 0.154(7) Uani 0.257(3) 1 d PG A 2
H3'B H 0.6861 1.0447 0.5643 0.185 Uiso 0.257(3) 1 calc PR A 2
C4'A C 0.6464(7) 0.9887(4) 0.6509(6) 0.100(4) Uani 0.257(3) 1 d PGD A 2
C5'A C 0.6245(7) 0.9217(5) 0.6707(5) 0.118(5) Uani 0.257(3) 1 d PG A 2
H5'B H 0.6077 0.9143 0.7198 0.142 Uiso 0.257(3) 1 calc PR A 2
C6'A C 0.6277(6) 0.8657(3) 0.6172(5) 0.106(4) Uani 0.257(3) 1 d PG A 2
H6'B H 0.6130 0.8208 0.6305 0.127 Uiso 0.257(3) 1 calc PR A 2
O4'A O 0.6430(8) 1.0569(4) 0.6826(9) 0.197(6) Uani 0.257(3) 1 d PD A 2
C7'A C 0.5907(17) 1.0593(12) 0.7382(14) 0.207(14) Uani 0.257(3) 1 d PD A 2
H7'D H 0.6347 1.0642 0.7988 0.310 Uiso 0.257(3) 1 calc PR A 2
H7'E H 0.5544 1.0168 0.7320 0.310 Uiso 0.257(3) 1 calc PR A 2
H7'F H 0.5472 1.0984 0.7222 0.310 Uiso 0.257(3) 1 calc PR A 2
Si1 Si 0.35944(4) 0.65917(3) 0.31644(4) 0.05892(15) Uani 1 1 d . . .
C1A C 0.30992(17) 0.60558(13) 0.38755(17) 0.0785(6) Uani 1 1 d . A .
H1AA H 0.3169 0.5565 0.3735 0.094 Uiso 1 1 calc R . .
C1B C 0.2006(2) 0.61788(19) 0.3627(2) 0.1083(10) Uani 1 1 d . . .
H1BA H 0.1748 0.5819 0.3888 0.162 Uiso 1 1 calc R A .
H1BB H 0.1683 0.6167 0.2993 0.162 Uiso 1 1 calc R . .
H1BC H 0.1907 0.6627 0.3847 0.162 Uiso 1 1 calc R . .
C1C C 0.3638(2) 0.61304(19) 0.4880(2) 0.1069(9) Uani 1 1 d . . .
H1CA H 0.3356 0.5821 0.5184 0.160 Uiso 1 1 calc R A .
H1CB H 0.3587 0.6604 0.5054 0.160 Uiso 1 1 calc R . .
H1CC H 0.4307 0.6012 0.5033 0.160 Uiso 1 1 calc R . .
C1D C 0.30706(17) 0.62435(15) 0.19886(16) 0.0822(6) Uani 1 1 d . A .
H1DA H 0.2370 0.6317 0.1780 0.099 Uiso 1 1 calc R . .
C1E C 0.3223(3) 0.54543(18) 0.1914(2) 0.1192(11) Uani 1 1 d . . .
H1EA H 0.2859 0.5301 0.1319 0.179 Uiso 1 1 calc R A .
H1EB H 0.3008 0.5206 0.2321 0.179 Uiso 1 1 calc R . .
H1EC H 0.3898 0.5362 0.2057 0.179 Uiso 1 1 calc R . .
C1F C 0.3422(3) 0.6651(2) 0.13546(19) 0.1176(12) Uani 1 1 d . . .
H1FA H 0.3068 0.6501 0.0756 0.176 Uiso 1 1 calc R A .
H1FB H 0.4100 0.6564 0.1505 0.176 Uiso 1 1 calc R . .
H1FC H 0.3319 0.7142 0.1405 0.176 Uiso 1 1 calc R . .
C1G C 0.33090(15) 0.75535(11) 0.31706(16) 0.0712(5) Uani 1 1 d . A .
H1GA H 0.3768 0.7798 0.2969 0.085 Uiso 1 1 calc R . .
C1H C 0.23020(19) 0.77557(18) 0.2520(2) 0.1080(10) Uani 1 1 d . . .
H1HA H 0.2190 0.8243 0.2590 0.162 Uiso 1 1 calc R A .
H1HB H 0.1824 0.7480 0.2638 0.162 Uiso 1 1 calc R . .
H1HC H 0.2259 0.7671 0.1923 0.162 Uiso 1 1 calc R . .
C1I C 0.3480(2) 0.78386(15) 0.4095(2) 0.0927(7) Uani 1 1 d . . .
H1IA H 0.3413 0.8339 0.4067 0.139 Uiso 1 1 calc R A .
H1IB H 0.4121 0.7716 0.4493 0.139 Uiso 1 1 calc R . .
H1IC H 0.3014 0.7640 0.4306 0.139 Uiso 1 1 calc R . .
Si2 Si 0.92393(4) 0.83052(3) 0.33369(4) 0.06745(17) Uani 1 1 d . . .
C2A C 0.95560(18) 0.82285(17) 0.45720(17) 0.0907(8) Uani 1 1 d . A .
H2AA H 0.9111 0.7881 0.4651 0.109 Uiso 1 1 calc R . .
C2B C 1.0589(2) 0.7943(3) 0.5077(3) 0.1519(18) Uani 1 1 d . . .
H2BA H 1.0691 0.7880 0.5692 0.228 Uiso 1 1 calc R A .
H2BB H 1.1055 0.8269 0.5025 0.228 Uiso 1 1 calc R . .
H2BC H 1.0662 0.7502 0.4826 0.228 Uiso 1 1 calc R . .
C2C C 0.9368(3) 0.8908(2) 0.4976(2) 0.1270(12) Uani 1 1 d . . .
H2CA H 0.9367 0.8815 0.5557 0.190 Uiso 1 1 calc R A .
H2CB H 0.8751 0.9095 0.4605 0.190 Uiso 1 1 calc R . .
H2CC H 0.9867 0.9240 0.5021 0.190 Uiso 1 1 calc R . .
C2D C 0.97682(19) 0.91093(16) 0.30226(19) 0.0903(7) Uani 1 1 d . A .
H2DA H 0.9678 0.9046 0.2397 0.108 Uiso 1 1 calc R . .
C2E C 1.0867(2) 0.9173(2) 0.3529(3) 0.1301(13) Uani 1 1 d . . .
H2EA H 1.1109 0.9562 0.3299 0.195 Uiso 1 1 calc R A .
H2EB H 1.1178 0.8751 0.3455 0.195 Uiso 1 1 calc R . .
H2EC H 1.1000 0.9247 0.4149 0.195 Uiso 1 1 calc R . .
C2F C 0.9280(3) 0.9795(2) 0.3063(3) 0.1311(13) Uani 1 1 d . . .
H2FA H 0.9568 1.0164 0.2844 0.197 Uiso 1 1 calc R A .
H2FB H 0.9360 0.9892 0.3666 0.197 Uiso 1 1 calc R . .
H2FC H 0.8603 0.9764 0.2703 0.197 Uiso 1 1 calc R . .
C2G C 0.9679(2) 0.75103(17) 0.2907(2) 0.1062(9) Uani 1 1 d . A .
H2GA H 1.0384 0.7499 0.3209 0.127 Uiso 1 1 calc R . .
C2H C 0.9463(4) 0.7545(3) 0.1904(3) 0.1599(17) Uani 1 1 d . . .
H2HA H 0.9909 0.7250 0.1766 0.240 Uiso 1 1 calc R A .
H2HB H 0.9532 0.8019 0.1740 0.240 Uiso 1 1 calc R . .
H2HC H 0.8814 0.7388 0.1581 0.240 Uiso 1 1 calc R . .
C2I C 0.9296(3) 0.6830(2) 0.3134(4) 0.1593(18) Uani 1 1 d . . .
H2IA H 0.9549 0.6443 0.2911 0.239 Uiso 1 1 calc R A .
H2IB H 0.8602 0.6828 0.2866 0.239 Uiso 1 1 calc R . .
H2IC H 0.9496 0.6790 0.3767 0.239 Uiso 1 1 calc R . .
C6 C 0.66478(14) 0.65857(10) 0.40240(13) 0.0592(4) Uani 1 1 d . A .
C1S C 1.125(3) 0.539(3) 0.594(3) 0.165(16) Uani 0.15 1 d P . .
C2S C 0.954(2) 0.5457(12) 0.510(3) 0.113(10) Uani 0.15 1 d P . .
C3S C 1.006(5) 0.587(3) 0.545(6) 0.20(3) Uani 0.10 1 d P . .
C4S C 0.952(3) 0.5656(19) 0.538(3) 0.130(11) Uani 0.15 1 d P . .
C5S C 1.061(4) 0.582(3) 0.573(3) 0.135(18) Uani 0.15 1 d P . .
C6S C 0.882(3) 0.480(3) 0.441(3) 0.130(11) Uani 0.15 1 d P . .
C7S C 1.049(5) 0.559(4) 0.592(4) 0.19(3) Uani 0.15 1 d P . .
C8S C 0.966(6) 0.478(3) 0.520(8) 0.22(4) Uani 0.05 1 d P . .
C9S C 0.930(3) 0.5188(19) 0.480(3) 0.121(15) Uani 0.15 1 d P . .
C10S C 1.051(6) 0.572(5) 0.514(5) 0.14(2) Uani 0.05 1 d P . .
C11S C 0.880(6) 0.465(4) 0.361(4) 0.12(2) Uani 0.07 1 d P . .
C12S C 1.083(9) 0.559(3) 0.549(4) 0.16(3) Uani 0.07 1 d P . .
C13S C 0.947(4) 0.516(3) 0.521(3) 0.085(15) Uani 0.10 1 d P . .
C14S C 0.978(5) 0.518(3) 0.563(4) 0.131(17) Uani 0.10 1 d P . .
C15S C 0.889(4) 0.514(3) 0.425(7) 0.20(4) Uani 0.10 1 d P . .
C16S C 0.983(6) 0.489(3) 0.465(5) 0.16(2) Uani 0.10 1 d P . .
C17S C 1.066(4) 0.529(4) 0.629(5) 0.16(3) Uani 0.10 1 d P . .
C18S C 0.900(5) 0.436(4) 0.402(7) 0.13(3) Uani 0.10 1 d P . .
 
loop_
 _atom_site_aniso_label
 _atom_site_aniso_U_11
 _atom_site_aniso_U_22
 _atom_site_aniso_U_33
 _atom_site_aniso_U_23
 _atom_site_aniso_U_13
 _atom_site_aniso_U_12
C1 0.0486(8) 0.0605(10) 0.0590(10) -0.0015(7) 0.0182(7) 0.0023(7)
O1 0.0575(7) 0.0607(7) 0.0717(8) -0.0070(6) 0.0266(6) 0.0010(6)
C2 0.0520(9) 0.0605(10) 0.0509(9) -0.0021(7) 0.0153(7) 0.0045(7)
C3 0.0555(9) 0.0602(10) 0.0569(10) -0.0021(8) 0.0195(8) 0.0021(8)
C4 0.0708(11) 0.0611(11) 0.0682(11) -0.0007(9) 0.0251(9) 0.0027(9)
O4 0.0840(10) 0.0617(9) 0.1189(13) 0.0067(8) 0.0326(9) -0.0024(8)
C5 0.0675(11) 0.0633(11) 0.0677(11) 0.0022(9) 0.0199(9) 0.0111(9)
C7 0.0492(9) 0.0749(12) 0.0581(10) 0.0028(8) 0.0131(8) 0.0080(8)
C8 0.0478(8) 0.0673(11) 0.0532(9) -0.0033(8) 0.0149(7) -0.0002(7)
O8 0.0578(7) 0.0765(8) 0.0553(7) -0.0086(6) 0.0205(6) -0.0055(6)
C9 0.0533(9) 0.0673(11) 0.0533(9) -0.0044(8) 0.0162(8) 0.0021(8)
C10 0.0554(10) 0.0790(12) 0.0525(10) -0.0016(8) 0.0190(8) -0.0004(8)
C11 0.0670(12) 0.1177(18) 0.0556(11) 0.0056(11) 0.0203(10) -0.0083(12)
O11 0.0852(11) 0.219(3) 0.0674(10) 0.0343(13) 0.0239(9) -0.0260(14)
C12 0.0674(12) 0.0988(16) 0.0581(12) 0.0086(10) 0.0129(9) -0.0064(11)
C13 0.0552(10) 0.0734(12) 0.0570(10) 0.0029(8) 0.0133(8) 0.0019(9)
C14 0.0491(9) 0.0693(11) 0.0621(11) 0.0033(8) 0.0100(8) 0.0017(8)
C15 0.0720(15) 0.0639(15) 0.0646(15) -0.0003(12) 0.0270(12) -0.0040(12)
C1' 0.080(2) 0.0670(19) 0.0628(18) 0.0042(15) 0.0286(15) -0.0006(15)
C2' 0.185(4) 0.064(2) 0.087(3) 0.0042(18) 0.068(3) 0.034(2)
C3' 0.224(5) 0.064(2) 0.097(3) 0.0171(18) 0.089(3) 0.054(3)
C4' 0.106(2) 0.0516(18) 0.0704(17) 0.0100(15) 0.0452(16) 0.0120(18)
C5' 0.214(5) 0.0605(19) 0.106(3) 0.0053(19) 0.093(3) 0.006(3)
C6' 0.186(4) 0.077(2) 0.088(2) 0.0170(18) 0.074(3) 0.018(3)
O4' 0.171(2) 0.0853(15) 0.0770(13) 0.0018(11) 0.0659(15) 0.0353(15)
C7' 0.181(5) 0.080(3) 0.093(3) 0.006(3) 0.063(3) 0.023(3)
C15A 0.059(4) 0.053(3) 0.050(3) 0.005(3) 0.023(3) 0.000(3)
C1'A 0.057(4) 0.079(6) 0.035(4) -0.008(4) 0.017(3) 0.002(4)
C2'A 0.082(6) 0.075(7) 0.125(9) 0.010(6) 0.037(6) -0.008(5)
C3'A 0.110(9) 0.103(9) 0.25(2) -0.096(11) 0.065(11) -0.024(7)
C4'A 0.107(9) 0.073(7) 0.108(10) -0.041(7) 0.028(7) 0.001(6)
C5'A 0.183(11) 0.127(13) 0.061(5) 0.025(7) 0.064(6) 0.094(11)
C6'A 0.169(11) 0.063(6) 0.114(10) -0.017(6) 0.087(9) 0.029(6)
O4'A 0.242(15) 0.121(9) 0.278(18) -0.038(9) 0.155(13) -0.053(9)
C7'A 0.40(4) 0.126(16) 0.164(15) -0.067(12) 0.178(19) 0.038(19)
Si1 0.0508(3) 0.0639(3) 0.0615(3) -0.0032(2) 0.0203(2) -0.0022(2)
C1A 0.0786(13) 0.0739(13) 0.0922(15) 0.0017(11) 0.0426(12) -0.0061(10)
C1B 0.0823(15) 0.126(2) 0.130(2) 0.0047(18) 0.0554(16) -0.0189(16)
C1C 0.109(2) 0.129(2) 0.0898(18) 0.0301(17) 0.0453(15) 0.0062(18)
C1D 0.0616(11) 0.1065(18) 0.0739(13) -0.0168(12) 0.0200(10) -0.0091(11)
C1E 0.119(2) 0.120(2) 0.113(2) -0.0509(19) 0.0374(18) -0.0114(19)
C1F 0.111(2) 0.176(3) 0.0650(15) -0.0133(17) 0.0318(15) -0.031(2)
C1G 0.0602(10) 0.0690(12) 0.0883(14) 0.0046(10) 0.0323(10) 0.0053(9)
C1H 0.0732(15) 0.104(2) 0.140(3) 0.0209(18) 0.0314(16) 0.0228(14)
C1I 0.1098(18) 0.0760(15) 0.1098(19) -0.0133(13) 0.0612(15) -0.0028(13)
Si2 0.0503(3) 0.0864(4) 0.0646(3) -0.0018(3) 0.0202(2) -0.0028(2)
C2A 0.0656(13) 0.124(2) 0.0692(14) 0.0093(13) 0.0097(11) -0.0218(13)
C2B 0.0735(18) 0.239(5) 0.111(3) 0.052(3) -0.0033(17) -0.011(2)
C2C 0.151(3) 0.154(3) 0.0805(17) -0.0349(18) 0.0487(18) -0.069(2)
C2D 0.0810(14) 0.1049(18) 0.0869(16) 0.0031(13) 0.0333(12) -0.0165(13)
C2E 0.0851(18) 0.154(3) 0.152(3) 0.006(2) 0.0455(19) -0.040(2)
C2F 0.122(3) 0.109(2) 0.153(3) 0.019(2) 0.040(2) -0.012(2)
C2G 0.0798(14) 0.107(2) 0.148(3) -0.0182(18) 0.0617(16) -0.0002(14)
C2H 0.173(3) 0.180(4) 0.161(3) -0.065(3) 0.102(3) -0.010(3)
C2I 0.147(3) 0.094(2) 0.278(6) -0.027(3) 0.127(4) 0.003(2)
C6 0.0551(9) 0.0640(11) 0.0540(10) -0.0018(8) 0.0151(8) 0.0085(8)
C1S 0.22(3) 0.21(4) 0.095(18) 0.06(2) 0.10(2) 0.14(3)
C2S 0.185(19) 0.022(10) 0.18(2) -0.020(12) 0.128(19) 0.029(13)
C3S 0.22(4) 0.15(4) 0.34(7) 0.14(4) 0.21(5) 0.07(4)
C4S 0.20(3) 0.07(2) 0.18(3) 0.015(18) 0.14(2) 0.048(19)
C5S 0.13(3) 0.17(4) 0.10(2) -0.04(3) 0.04(2) 0.03(3)
C6S 0.18(2) 0.14(3) 0.11(2) 0.03(2) 0.105(19) 0.07(2)
C7S 0.14(4) 0.27(6) 0.17(4) 0.13(4) 0.08(3) 0.07(4)
C8S 0.31(7) 0.02(2) 0.37(11) 0.08(4) 0.19(8) -0.07(4)
C9S 0.18(3) 0.055(17) 0.09(2) 0.009(17) 0.01(2) 0.04(2)
C10S 0.20(5) 0.18(6) 0.09(3) 0.12(4) 0.11(3) 0.06(5)
C11S 0.17(5) 0.11(4) 0.09(3) -0.03(3) 0.07(3) -0.06(4)
C12S 0.39(9) 0.07(3) 0.07(2) 0.07(2) 0.15(4) 0.08(4)
C13S 0.11(3) 0.06(3) 0.07(2) 0.03(2) 0.03(2) -0.01(2)
C14S 0.23(4) 0.07(3) 0.18(4) -0.03(3) 0.17(4) -0.03(3)
C15S 0.12(3) 0.10(3) 0.41(11) 0.17(5) 0.12(4) 0.08(2)
C16S 0.17(4) 0.10(3) 0.19(4) -0.11(3) 0.04(4) 0.04(3)
C17S 0.09(3) 0.20(6) 0.17(5) 0.10(4) 0.03(3) -0.03(3)
C18S 0.10(3) 0.11(4) 0.14(6) -0.01(4) 0.01(4) 0.03(3)
 
_geom_special_details
;
 All esds (except the esd in the dihedral angle between two l.s. planes)
 are estimated using the full covariance matrix.  The cell esds are taken
 into account individually in the estimation of esds in distances, angles
 and torsion angles; correlations between esds in cell parameters are only
 used when they are defined by crystal symmetry.  An approximate (isotropic)
 treatment of cell esds is used for estimating esds involving l.s. planes.
;
 
loop_
 _geom_bond_atom_site_label_1
 _geom_bond_atom_site_label_2
 _geom_bond_distance
 _geom_bond_site_symmetry_2
 _geom_bond_publ_flag
C1 O1 1.434(2) . ?
C1 C14 1.501(3) . ?
C1 C2 1.511(3) . ?
C1 C8 1.581(2) . ?
O1 C15 1.424(3) . ?
O1 C15A 1.532(7) . ?
C2 C3 1.354(3) . ?
C2 C6 1.463(2) . ?
C3 C4 1.508(3) . ?
C3 Si1 1.8950(19) . ?
C4 O4 1.214(3) . ?
C4 C5 1.526(3) . ?
C5 C6 1.484(3) . ?
C7 C6 1.335(3) . ?
C7 C8 1.508(3) . ?
C8 O8 1.435(2) . ?
C8 C9 1.517(3) . ?
O8 C15A 1.396(7) . ?
O8 C15 1.451(3) . ?
C9 C10 1.356(3) . ?
C9 C13 1.461(3) . ?
C10 C11 1.500(3) . ?
C10 Si2 1.897(2) . ?
C11 O11 1.215(3) . ?
C11 C12 1.529(3) . ?
C12 C13 1.493(3) . ?
C13 C14 1.327(3) . ?
C15 C1' 1.486(3) . ?
C1' C2' 1.3900 . ?
C1' C6' 1.3900 . ?
C2' C3' 1.3900 . ?
C3' C4' 1.3900 . ?
C4' O4' 1.366(3) . ?
C4' C5' 1.3900 . ?
C5' C6' 1.3900 . ?
O4' C7' 1.393(6) . ?
C15A C1'A 1.512(8) . ?
C1'A C2'A 1.3900 . ?
C1'A C6'A 1.3900 . ?
C2'A C3'A 1.3900 . ?
C3'A C4'A 1.3900 . ?
C4'A C5'A 1.3900 . ?
C4'A O4'A 1.408(5) . ?
C5'A C6'A 1.3900 . ?
O4'A C7'A 1.395(5) . ?
Si1 C1A 1.887(2) . ?
Si1 C1G 1.887(2) . ?
Si1 C1D 1.892(2) . ?
C1A C1C 1.531(4) . ?
C1A C1B 1.542(4) . ?
C1D C1F 1.530(4) . ?
C1D C1E 1.537(4) . ?
C1G C1I 1.525(4) . ?
C1G C1H 1.526(3) . ?
Si2 C2D 1.882(3) . ?
Si2 C2A 1.885(3) . ?
Si2 C2G 1.887(3) . ?
C2A C2C 1.527(5) . ?
C2A C2B 1.547(4) . ?
C2D C2F 1.512(5) . ?
C2D C2E 1.537(4) . ?
C2G C2I 1.518(5) . ?
C2G C2H 1.539(6) . ?
C1S C18S 0.63(7) 3_766 ?
C1S C6S 0.64(4) 3_766 ?
C1S C12S 0.84(9) . ?
C1S C11S 0.76(7) 3_766 ?
C1S C15S 1.04(9) 3_766 ?
C1S C7S 1.18(7) . ?
C1S C5S 1.20(7) . ?
C1S C17S 1.22(7) . ?
C1S C10S 1.49(8) . ?
C1S C9S 1.60(6) 3_766 ?
C1S C16S 1.61(9) 3_766 ?
C1S C3S 1.88(8) . ?
C2S C13S 0.62(5) . ?
C2S C4S 0.60(3) . ?
C2S C9S 0.71(4) . ?
C2S C14S 0.96(7) . ?
C2S C16S 1.10(8) 3_766 ?
C2S C3S 1.10(9) . ?
C2S C8S 1.32(6) . ?
C2S C10S 1.51(9) . ?
C2S C8S 1.52(11) 3_766 ?
C2S C16S 1.46(5) . ?
C2S C15S 1.50(11) . ?
C2S C7S 1.56(8) . ?
C3S C5S 0.78(9) . ?
C3S C4S 0.88(7) . ?
C3S C7S 0.95(9) . ?
C3S C10S 1.02(10) . ?
C3S C18S 1.41(9) 3_766 ?
C3S C14S 1.44(8) . ?
C3S C12S 1.25(12) . ?
C3S C16S 1.48(8) 3_766 ?
C3S C13S 1.58(9) . ?
C3S C17S 1.72(9) . ?
C3S C8S 1.77(15) 3_766 ?
C4S C14S 1.01(8) . ?
C4S C13S 0.98(6) . ?
C4S C9S 1.25(5) . ?
C4S C7S 1.39(8) . ?
C4S C16S 1.45(6) 3_766 ?
C4S C5S 1.55(7) . ?
C4S C10S 1.68(8) . ?
C4S C8S 1.73(9) . ?
C4S C17S 1.92(8) . ?
C4S C8S 1.99(12) 3_766 ?
C5S C7S 0.60(10) . ?
C5S C18S 0.66(7) 3_766 ?
C5S C12S 0.74(8) . ?
C5S C10S 0.94(8) . ?
C5S C17S 1.34(8) . ?
C5S C11S 1.41(10) 3_766 ?
C5S C6S 1.52(6) 3_766 ?
C5S C16S 1.54(8) 3_766 ?
C6S C15S 0.73(5) . ?
C6S C1S 0.64(4) 3_766 ?
C6S C12S 0.88(8) 3_766 ?
C6S C9S 1.07(6) . ?
C6S C18S 1.15(9) . ?
C6S C11S 1.32(7) . ?
C6S C10S 1.40(9) 3_766 ?
C6S C16S 1.42(9) . ?
C6S C8S 1.42(10) . ?
C6S C13S 1.47(7) . ?
C6S C7S 1.53(8) 3_766 ?
C6S C5S 1.52(6) 3_766 ?
C7S C18S 0.73(10) 3_766 ?
C7S C17S 0.80(7) . ?
C7S C12S 1.00(11) . ?
C7S C11S 1.14(10) 3_766 ?
C7S C10S 1.31(8) . ?
C7S C16S 1.26(9) 3_766 ?
C7S C14S 1.26(9) . ?
C7S C6S 1.53(8) 3_766 ?
C8S C13S 0.79(9) . ?
C8S C16S 0.95(9) 3_766 ?
C8S C10S 1.08(14) 3_766 ?
C8S C14S 1.00(12) . ?
C8S C9S 1.04(7) . ?
C8S C16S 1.04(12) . ?
C8S C12S 1.30(13) 3_766 ?
C8S C2S 1.52(11) 3_766 ?
C8S C9S 1.55(9) 3_766 ?
C8S C8S 1.65(13) 3_766 ?
C9S C13S 0.62(4) . ?
C9S C15S 0.89(10) . ?
C9S C16S 1.06(7) . ?
C9S C14S 1.26(7) . ?
C9S C16S 1.28(8) 3_766 ?
C9S C8S 1.55(9) 3_766 ?
C9S C12S 1.55(7) 3_766 ?
C9S C1S 1.60(6) 3_766 ?
C10S C12S 0.65(9) . ?
C10S C8S 1.08(14) 3_766 ?
C10S C18S 1.30(11) 3_766 ?
C10S C16S 1.37(10) 3_766 ?
C10S C6S 1.40(9) 3_766 ?
C10S C9S 1.75(9) 3_766 ?
C11S C1S 0.76(7) 3_766 ?
C11S C17S 0.77(8) 3_766 ?
C11S C18S 0.82(10) . ?
C11S C7S 1.14(10) 3_766 ?
C11S C15S 1.35(13) . ?
C11S C12S 1.42(8) 3_766 ?
C11S C5S 1.41(10) 3_766 ?
C11S C16S 1.86(9) . ?
C12S C18S 0.75(11) 3_766 ?
C12S C6S 0.88(8) 3_766 ?
C12S C11S 1.42(8) 3_766 ?
C12S C8S 1.30(13) 3_766 ?
C12S C15S 1.46(6) 3_766 ?
C12S C16S 1.30(12) 3_766 ?
C12S C17S 1.52(7) . ?
C13S C14S 0.66(7) . ?
C13S C16S 0.99(8) 3_766 ?
C13S C16S 1.32(9) . ?
C13S C15S 1.48(11) . ?
C13S C8S 1.68(11) 3_766 ?
C13S C10S 1.77(11) 3_766 ?
C14S C16S 0.88(9) 3_766 ?
C14S C17S 1.37(10) . ?
C14S C16S 1.71(9) . ?
C14S C8S 1.84(12) 3_766 ?
C15S C1S 1.04(9) 3_766 ?
C15S C16S 1.39(9) . ?
C15S C12S 1.46(6) 3_766 ?
C15S C17S 1.52(13) 3_766 ?
C15S C18S 1.55(10) . ?
C15S C7S 1.75(11) 3_766 ?
C16S C14S 0.88(9) 3_766 ?
C16S C8S 0.95(9) 3_766 ?
C16S C13S 0.99(8) 3_766 ?
C16S C2S 1.10(8) 3_766 ?
C16S C16S 1.14(12) 3_766 ?
C16S C9S 1.28(8) 3_766 ?
C16S C7S 1.26(9) 3_766 ?
C16S C10S 1.37(10) 3_766 ?
C16S C17S 1.46(10) 3_766 ?
C17S C11S 0.77(8) 3_766 ?
C17S C18S 1.06(12) 3_766 ?
C17S C16S 1.46(10) 3_766 ?
C17S C15S 1.52(13) 3_766 ?
C17S C6S 1.61(8) 3_766 ?
C18S C1S 0.63(7) 3_766 ?
C18S C7S 0.73(9) 3_766 ?
C18S C5S 0.66(7) 3_766 ?
C18S C12S 0.75(11) 3_766 ?
C18S C17S 1.06(12) 3_766 ?
C18S C10S 1.30(11) 3_766 ?
C18S C3S 1.41(9) 3_766 ?
C18S C14S 1.91(10) 3_766 ?
 
loop_
 _geom_angle_atom_site_label_1
 _geom_angle_atom_site_label_2
 _geom_angle_atom_site_label_3
 _geom_angle
 _geom_angle_site_symmetry_1
 _geom_angle_site_symmetry_3
 _geom_angle_publ_flag
O1 C1 C14 112.65(15) . . ?
O1 C1 C2 111.11(15) . . ?
C14 C1 C2 119.01(16) . . ?
O1 C1 C8 103.46(13) . . ?
C14 C1 C8 104.37(15) . . ?
C2 C1 C8 104.37(14) . . ?
C15 O1 C1 105.89(16) . . ?
C15 O1 C15A 50.8(3) . . ?
C1 O1 C15A 102.4(3) . . ?
C3 C2 C6 113.51(17) . . ?
C3 C2 C1 139.03(17) . . ?
C6 C2 C1 107.45(16) . . ?
C2 C3 C4 105.59(16) . . ?
C2 C3 Si1 133.45(15) . . ?
C4 C3 Si1 120.91(14) . . ?
O4 C4 C3 125.42(19) . . ?
O4 C4 C5 124.89(19) . . ?
C3 C4 C5 109.67(17) . . ?
C6 C5 C4 102.41(16) . . ?
C6 C7 C8 111.13(16) . . ?
O8 C8 C7 111.37(15) . . ?
O8 C8 C9 111.45(16) . . ?
C7 C8 C9 119.75(16) . . ?
O8 C8 C1 103.90(14) . . ?
C7 C8 C1 104.33(15) . . ?
C9 C8 C1 104.23(14) . . ?
C15A O8 C8 105.6(3) . . ?
C15A O8 C15 53.0(3) . . ?
C8 O8 C15 104.50(15) . . ?
C10 C9 C13 113.48(18) . . ?
C10 C9 C8 139.57(17) . . ?
C13 C9 C8 106.94(16) . . ?
C9 C10 C11 105.68(17) . . ?
C9 C10 Si2 133.36(16) . . ?
C11 C10 Si2 120.81(15) . . ?
O11 C11 C10 126.0(2) . . ?
O11 C11 C12 123.7(2) . . ?
C10 C11 C12 110.31(19) . . ?
C13 C12 C11 101.85(17) . . ?
C14 C13 C9 113.10(18) . . ?
C14 C13 C12 138.20(19) . . ?
C9 C13 C12 108.65(18) . . ?
C13 C14 C1 111.27(16) . . ?
O1 C15 O8 103.64(19) . . ?
O1 C15 C1' 108.9(2) . . ?
O8 C15 C1' 111.9(2) . . ?
C2' C1' C6' 120.0 . . ?
C2' C1' C15 119.33(18) . . ?
C6' C1' C15 120.54(18) . . ?
C3' C2' C1' 120.0 . . ?
C4' C3' C2' 120.0 . . ?
O4' C4' C3' 118.54(19) . . ?
O4' C4' C5' 121.46(19) . . ?
C3' C4' C5' 120.0 . . ?
C4' C5' C6' 120.0 . . ?
C5' C6' C1' 120.0 . . ?
C4' O4' C7' 122.2(3) . . ?
O8 C15A C1'A 108.9(5) . . ?
O8 C15A O1 100.9(4) . . ?
C1'A C15A O1 108.7(5) . . ?
C2'A C1'A C6'A 120.0 . . ?
C2'A C1'A C15A 123.1(5) . . ?
C6'A C1'A C15A 116.9(5) . . ?
C3'A C2'A C1'A 120.0 . . ?
C2'A C3'A C4'A 120.0 . . ?
C5'A C4'A C3'A 120.0 . . ?
C5'A C4'A O4'A 136.4(9) . . ?
C3'A C4'A O4'A 103.3(9) . . ?
C4'A C5'A C6'A 120.0 . . ?
C5'A C6'A C1'A 120.0 . . ?
C7'A O4'A C4'A 111.9(11) . . ?
C1A Si1 C1G 112.65(11) . . ?
C1A Si1 C1D 108.53(12) . . ?
C1G Si1 C1D 109.82(11) . . ?
C1A Si1 C3 109.13(10) . . ?
C1G Si1 C3 108.66(9) . . ?
C1D Si1 C3 107.94(10) . . ?
C1C C1A C1B 110.2(2) . . ?
C1C C1A Si1 115.59(18) . . ?
C1B C1A Si1 111.91(19) . . ?
C1F C1D C1E 110.4(3) . . ?
C1F C1D Si1 112.56(19) . . ?
C1E C1D Si1 114.0(2) . . ?
C1I C1G C1H 110.5(2) . . ?
C1I C1G Si1 113.46(17) . . ?
C1H C1G Si1 114.08(18) . . ?
C2D Si2 C2A 112.82(13) . . ?
C2D Si2 C2G 108.61(14) . . ?
C2A Si2 C2G 110.26(16) . . ?
C2D Si2 C10 109.93(11) . . ?
C2A Si2 C10 108.70(10) . . ?
C2G Si2 C10 106.32(12) . . ?
C2C C2A C2B 112.3(3) . . ?
C2C C2A Si2 112.2(2) . . ?
C2B C2A Si2 113.2(2) . . ?
C2F C2D C2E 109.9(3) . . ?
C2F C2D Si2 116.1(2) . . ?
C2E C2D Si2 112.9(2) . . ?
C2I C2G C2H 110.1(4) . . ?
C2I C2G Si2 112.8(2) . . ?
C2H C2G Si2 113.1(3) . . ?
C7 C6 C2 112.66(17) . . ?
C7 C6 C5 138.78(18) . . ?
C2 C6 C5 108.53(17) . . ?
C18S C1S C6S 129(10) 3_766 3_766 ?
C18S C1S C12S 59(10) 3_766 . ?
C6S C1S C12S 71(6) 3_766 . ?
C18S C1S C11S 72(10) 3_766 3_766 ?
C6S C1S C11S 140(10) 3_766 3_766 ?
C12S C1S C11S 124(10) . 3_766 ?
C18S C1S C15S 136(10) 3_766 3_766 ?
C6S C1S C15S 44(8) 3_766 3_766 ?
C12S C1S C15S 101(8) . 3_766 ?
C11S C1S C15S 96(10) 3_766 3_766 ?
C18S C1S C7S 32(9) 3_766 . ?
C6S C1S C7S 110(8) 3_766 . ?
C12S C1S C7S 56(8) . . ?
C11S C1S C7S 68(8) 3_766 . ?
C15S C1S C7S 103(7) 3_766 . ?
C18S C1S C5S 22(9) 3_766 . ?
C6S C1S C5S 107(7) 3_766 . ?
C12S C1S C5S 37(6) . . ?
C11S C1S C5S 89(9) 3_766 . ?
C15S C1S C5S 123(6) 3_766 . ?
C7S C1S C5S 29(5) . . ?
C18S C1S C17S 60(10) 3_766 . ?
C6S C1S C17S 116(9) 3_766 . ?
C12S C1S C17S 93(9) . . ?
C11S C1S C17S 37(7) 3_766 . ?
C15S C1S C17S 84(7) 3_766 . ?
C7S C1S C17S 39(4) . . ?
C5S C1S C17S 67(5) . . ?
C18S C1S C10S 60(10) 3_766 . ?
C6S C1S C10S 69(7) 3_766 . ?
C12S C1S C10S 2(6) . . ?
C11S C1S C10S 125(9) 3_766 . ?
C15S C1S C10S 99(7) 3_766 . ?
C7S C1S C10S 57(4) . . ?
C5S C1S C10S 39(4) . . ?
C17S C1S C10S 93(5) . . ?
C18S C1S C9S 117(8) 3_766 3_766 ?
C6S C1S C9S 27(6) 3_766 3_766 ?
C12S C1S C9S 71(6) . 3_766 ?
C11S C1S C9S 117(7) 3_766 3_766 ?
C15S C1S C9S 31(5) 3_766 3_766 ?
C7S C1S C9S 90(5) . 3_766 ?
C5S C1S C9S 98(4) . 3_766 ?
C17S C1S C9S 90(6) . 3_766 ?
C10S C1S C9S 69(4) . 3_766 ?
C18S C1S C16S 80(8) 3_766 3_766 ?
C6S C1S C16S 61(6) 3_766 3_766 ?
C12S C1S C16S 53(7) . 3_766 ?
C11S C1S C16S 96(8) 3_766 3_766 ?
C15S C1S C16S 58(4) 3_766 3_766 ?
C7S C1S C16S 51(5) . 3_766 ?
C5S C1S C16S 64(4) . 3_766 ?
C17S C1S C16S 60(5) . 3_766 ?
C10S C1S C16S 52(4) . 3_766 ?
C9S C1S C16S 39(3) 3_766 3_766 ?
C18S C1S C3S 35(8) 3_766 . ?
C6S C1S C3S 95(7) 3_766 . ?
C12S C1S C3S 32(7) . . ?
C11S C1S C3S 92(9) 3_766 . ?
C15S C1S C3S 108(5) 3_766 . ?
C7S C1S C3S 25(4) . . ?
C5S C1S C3S 15(4) . . ?
C17S C1S C3S 63(4) . . ?
C10S C1S C3S 33(4) . . ?
C9S C1S C3S 83(4) 3_766 . ?
C16S C1S C3S 49(3) 3_766 . ?
C13S C2S C4S 107(9) . . ?
C13S C2S C9S 56(5) . . ?
C4S C2S C9S 146(8) . . ?
C13S C2S C14S 43(6) . . ?
C4S C2S C14S 77(7) . . ?
C9S C2S C14S 98(5) . . ?
C13S C2S C16S 63(7) . 3_766 ?
C4S C2S C16S 113(7) . 3_766 ?
C9S C2S C16S 87(4) . 3_766 ?
C14S C2S C16S 50(5) . 3_766 ?
C13S C2S C3S 132(8) . . ?
C4S C2S C3S 53(5) . . ?
C9S C2S C3S 161(8) . . ?
C14S C2S C3S 89(6) . . ?
C16S C2S C3S 84(5) 3_766 . ?
C13S C2S C8S 23(7) . . ?
C4S C2S C8S 125(8) . . ?
C9S C2S C8S 51(5) . . ?
C14S C2S C8S 49(6) . . ?
C16S C2S C8S 45(5) 3_766 . ?
C3S C2S C8S 127(6) . . ?
C13S C2S C10S 124(7) . . ?
C4S C2S C10S 95(6) . . ?
C9S C2S C10S 119(6) . . ?
C14S C2S C10S 97(5) . . ?
C16S C2S C10S 61(5) 3_766 . ?
C3S C2S C10S 43(6) . . ?
C8S C2S C10S 104(5) . . ?
C13S C2S C8S 94(7) . 3_766 ?
C4S C2S C8S 135(7) . 3_766 ?
C9S C2S C8S 79(6) . 3_766 ?
C14S C2S C8S 93(5) . 3_766 ?
C16S C2S C8S 43(5) 3_766 3_766 ?
C3S C2S C8S 84(6) . 3_766 ?
C8S C2S C8S 70(4) . 3_766 ?
C10S C2S C8S 42(5) . 3_766 ?
C13S C2S C16S 65(7) . . ?
C4S C2S C16S 163(6) . . ?
C9S C2S C16S 43(5) . . ?
C14S C2S C16S 88(5) . . ?
C16S C2S C16S 50(5) 3_766 . ?
C3S C2S C16S 120(6) . . ?
C8S C2S C16S 44(5) . . ?
C10S C2S C16S 79(5) . . ?
C8S C2S C16S 37(4) 3_766 . ?
C13S C2S C15S 77(6) . . ?
C4S C2S C15S 139(6) . . ?
C9S C2S C15S 23(4) . . ?
C14S C2S C15S 120(5) . . ?
C16S C2S C15S 105(4) 3_766 . ?
C3S C2S C15S 149(6) . . ?
C8S C2S C15S 74(5) . . ?
C10S C2S C15S 117(5) . . ?
C8S C2S C15S 84(5) 3_766 . ?
C16S C2S C15S 56(4) . . ?
C13S C2S C7S 96(7) . . ?
C4S C2S C7S 63(6) . . ?
C9S C2S C7S 140(5) . . ?
C14S C2S C7S 54(5) . . ?
C16S C2S C7S 54(4) 3_766 . ?
C3S C2S C7S 37(4) . . ?
C8S C2S C7S 91(5) . . ?
C10S C2S C7S 50(4) . . ?
C8S C2S C7S 76(5) 3_766 . ?
C16S C2S C7S 102(5) . . ?
C15S C2S C7S 158(4) . . ?
C5S C3S C4S 138(10) . . ?
C5S C3S C7S 39(8) . . ?
C4S C3S C7S 99(7) . . ?
C5S C3S C10S 61(7) . . ?
C4S C3S C10S 124(10) . . ?
C7S C3S C10S 83(8) . . ?
C5S C3S C2S 127(9) . . ?
C4S C3S C2S 33(4) . . ?
C7S C3S C2S 99(7) . . ?
C10S C3S C2S 91(10) . . ?
C5S C3S C18S 12(7) . 3_766 ?
C4S C3S C18S 127(8) . 3_766 ?
C7S C3S C18S 29(7) . 3_766 ?
C10S C3S C18S 62(7) . 3_766 ?
C2S C3S C18S 116(6) . 3_766 ?
C5S C3S C14S 96(8) . . ?
C4S C3S C14S 44(5) . . ?
C7S C3S C14S 59(6) . . ?
C10S C3S C14S 98(8) . . ?
C2S C3S C14S 41(4) . . ?
C18S C3S C14S 84(6) 3_766 . ?
C5S C3S C12S 34(5) . . ?
C4S C3S C12S 127(9) . . ?
C7S C3S C12S 52(6) . . ?
C10S C3S C12S 31(4) . . ?
C2S C3S C12S 101(8) . . ?
C18S C3S C12S 32(5) 3_766 . ?
C14S C3S C12S 86(6) . . ?
C5S C3S C16S 79(7) . 3_766 ?
C4S C3S C16S 71(6) . 3_766 ?
C7S C3S C16S 58(6) . 3_766 ?
C10S C3S C16S 63(7) . 3_766 ?
C2S C3S C16S 48(5) . 3_766 ?
C18S C3S C16S 69(5) 3_766 3_766 ?
C14S C3S C16S 35(4) . 3_766 ?
C12S C3S C16S 56(6) . 3_766 ?
C5S C3S C13S 115(8) . . ?
C4S C3S C13S 34(5) . . ?
C7S C3S C13S 82(7) . . ?
C10S C3S C13S 93(9) . . ?
C2S C3S C13S 17(3) . . ?
C18S C3S C13S 103(5) 3_766 . ?
C14S C3S C13S 25(3) . . ?
C12S C3S C13S 94(6) . . ?
C16S C3S C13S 38(4) 3_766 . ?
C5S C3S C17S 49(7) . . ?
C4S C3S C17S 89(5) . . ?
C7S C3S C17S 10(6) . . ?
C10S C3S C17S 88(6) . . ?
C2S C3S C17S 91(4) . . ?
C18S C3S C17S 38(5) 3_766 . ?
C14S C3S C17S 50(4) . . ?
C12S C3S C17S 59(4) . . ?
C16S C3S C17S 54(4) 3_766 . ?
C13S C3S C17S 74(4) . . ?
C5S C3S C8S 81(7) . 3_766 ?
C4S C3S C8S 91(8) . 3_766 ?
C7S C3S C8S 82(8) . 3_766 ?
C10S C3S C8S 33(7) . 3_766 ?
C2S C3S C8S 58(5) . 3_766 ?
C18S C3S C8S 76(6) 3_766 3_766 ?
C14S C3S C8S 69(4) . 3_766 ?
C12S C3S C8S 47(6) . 3_766 ?
C16S C3S C8S 36(4) 3_766 3_766 ?
C13S C3S C8S 60(4) . 3_766 ?
C17S C3S C8S 82(5) . 3_766 ?
C2S C4S C3S 94(8) . . ?
C2S C4S C14S 67(5) . . ?
C3S C4S C14S 99(6) . . ?
C2S C4S C13S 37(5) . . ?
C3S C4S C13S 116(7) . . ?
C14S C4S C13S 39(4) . . ?
C2S C4S C9S 18(4) . . ?
C3S C4S C9S 113(7) . . ?
C14S C4S C9S 67(4) . . ?
C13S C4S C9S 29(2) . . ?
C2S C4S C7S 94(6) . . ?
C3S C4S C7S 42(5) . . ?
C14S C4S C7S 61(5) . . ?
C13S C4S C7S 92(5) . . ?
C9S C4S C7S 108(5) . . ?
C2S C4S C16S 45(5) . 3_766 ?
C3S C4S C16S 74(6) . 3_766 ?
C14S C4S C16S 37(5) . 3_766 ?
C13S C4S C16S 43(4) . 3_766 ?
C9S C4S C16S 56(3) . 3_766 ?
C7S C4S C16S 53(4) . 3_766 ?
C2S C4S C5S 93(5) . . ?
C3S C4S C5S 20(5) . . ?
C14S C4S C5S 81(5) . . ?
C13S C4S C5S 105(5) . . ?
C9S C4S C5S 111(4) . . ?
C7S C4S C5S 23(4) . . ?
C16S C4S C5S 62(4) 3_766 . ?
C2S C4S C10S 64(6) . . ?
C3S C4S C10S 30(7) . . ?
C14S C4S C10S 85(5) . . ?
C13S C4S C10S 89(5) . . ?
C9S C4S C10S 82(5) . . ?
C7S C4S C10S 49(4) . . ?
C16S C4S C10S 51(4) 3_766 . ?
C5S C4S C10S 34(3) . . ?
C2S C4S C8S 39(6) . . ?
C3S C4S C8S 108(6) . . ?
C14S C4S C8S 31(5) . . ?
C13S C4S C8S 11(4) . . ?
C9S C4S C8S 36(4) . . ?
C7S C4S C8S 81(5) . . ?
C16S C4S C8S 33(4) 3_766 . ?
C5S C4S C8S 94(4) . . ?
C10S C4S C8S 82(5) . . ?
C2S C4S C17S 94(5) . . ?
C3S C4S C17S 64(5) . . ?
C14S C4S C17S 43(5) . . ?
C13S C4S C17S 79(4) . . ?
C9S C4S C17S 103(4) . . ?
C7S C4S C17S 21(4) . . ?
C16S C4S C17S 49(4) 3_766 . ?
C5S C4S C17S 44(3) . . ?
C10S C4S C17S 66(3) . . ?
C8S C4S C17S 69(4) . . ?
C2S C4S C8S 33(5) . 3_766 ?
C3S C4S C8S 63(7) . 3_766 ?
C14S C4S C8S 66(3) . 3_766 ?
C13S C4S C8S 57(4) . 3_766 ?
C9S C4S C8S 51(3) . 3_766 ?
C7S C4S C8S 65(4) . 3_766 ?
C16S C4S C8S 30(4) 3_766 3_766 ?
C5S C4S C8S 60(3) . 3_766 ?
C10S C4S C8S 33(4) . 3_766 ?
C8S C4S C8S 52(3) . 3_766 ?
C17S C4S C8S 72(4) . 3_766 ?
C7S C5S C18S 71(10) . 3_766 ?
C7S C5S C3S 85(10) . . ?
C18S C5S C3S 154(10) 3_766 . ?
C7S C5S C12S 96(10) . . ?
C18S C5S C12S 64(10) 3_766 . ?
C3S C5S C12S 110(10) . . ?
C7S C5S C10S 114(10) . . ?
C18S C5S C10S 107(10) 3_766 . ?
C3S C5S C10S 72(9) . . ?
C12S C5S C10S 43(7) . . ?
C7S C5S C1S 74(10) . . ?
C18S C5S C1S 21(9) 3_766 . ?
C3S C5S C1S 141(9) . . ?
C12S C5S C1S 44(7) . . ?
C10S C5S C1S 87(7) . . ?
C7S C5S C17S 19(8) . . ?
C18S C5S C17S 51(10) 3_766 . ?
C3S C5S C17S 105(8) . . ?
C12S C5S C17S 89(7) . . ?
C10S C5S C17S 119(8) . . ?
C1S C5S C17S 57(5) . . ?
C7S C5S C11S 52(9) . 3_766 ?
C18S C5S C11S 20(10) 3_766 3_766 ?
C3S C5S C11S 137(9) . 3_766 ?
C12S C5S C11S 75(7) . 3_766 ?
C10S C5S C11S 117(8) . 3_766 ?
C1S C5S C11S 33(4) . 3_766 ?
C17S C5S C11S 32(3) . 3_766 ?
C7S C5S C4S 63(9) . . ?
C18S C5S C4S 132(10) 3_766 . ?
C3S C5S C4S 22(5) . . ?
C12S C5S C4S 107(10) . . ?
C10S C5S C4S 81(6) . . ?
C1S C5S C4S 125(5) . . ?
C17S C5S C4S 83(5) . . ?
C11S C5S C4S 114(5) 3_766 . ?
C7S C5S C6S 79(10) . 3_766 ?
C18S C5S C6S 45(9) 3_766 3_766 ?
C3S C5S C6S 122(8) . 3_766 ?
C12S C5S C6S 22(5) . 3_766 ?
C10S C5S C6S 64(6) . 3_766 ?
C1S C5S C6S 24(3) . 3_766 ?
C17S C5S C6S 68(5) . 3_766 ?
C11S C5S C6S 53(4) 3_766 3_766 ?
C4S C5S C6S 111(4) . 3_766 ?
C7S C5S C16S 52(10) . 3_766 ?
C18S C5S C16S 86(9) 3_766 3_766 ?
C3S C5S C16S 71(7) . 3_766 ?
C12S C5S C16S 57(9) . 3_766 ?
C10S C5S C16S 61(6) . 3_766 ?
C1S C5S C16S 71(4) . 3_766 ?
C17S C5S C16S 61(5) . 3_766 ?
C11S C5S C16S 78(5) 3_766 3_766 ?
C4S C5S C16S 56(3) . 3_766 ?
C6S C5S C16S 55(4) 3_766 3_766 ?
C7S C5S C2S 67(9) . . ?
C18S C5S C2S 124(10) 3_766 . ?
C3S C5S C2S 31(6) . . ?
C12S C5S C2S 87(10) . . ?
C10S C5S C2S 63(6) . . ?
C1S C5S C2S 110(4) . . ?
C17S C5S C2S 84(5) . . ?
C11S C5S C2S 112(5) 3_766 . ?
C4S C5S C2S 20.9(14) . . ?
C6S C5S C2S 93(3) 3_766 . ?
C16S C5S C2S 40(3) 3_766 . ?
C15S C6S C1S 99(10) . 3_766 ?
C15S C6S C12S 131(10) . 3_766 ?
C1S C6S C12S 65(6) 3_766 3_766 ?
C15S C6S C9S 55(9) . . ?
C1S C6S C9S 138(8) 3_766 . ?
C12S C6S C9S 105(8) 3_766 . ?
C15S C6S C18S 110(10) . . ?
C1S C6S C18S 25(6) 3_766 . ?
C12S C6S C18S 41(6) 3_766 . ?
C9S C6S C18S 126(6) . . ?
C15S C6S C11S 77(10) . . ?
C1S C6S C11S 22(6) 3_766 . ?
C12S C6S C11S 77(6) 3_766 . ?
C9S C6S C11S 119(5) . . ?
C18S C6S C11S 38(5) . . ?
C15S C6S C10S 131(7) . 3_766 ?
C1S C6S C10S 85(7) 3_766 3_766 ?
C12S C6S C10S 20(6) 3_766 3_766 ?
C9S C6S C10S 89(5) . 3_766 ?
C18S C6S C10S 60(6) . 3_766 ?
C11S C6S C10S 96(6) . 3_766 ?
C15S C6S C16S 73(6) . . ?
C1S C6S C16S 96(6) 3_766 . ?
C12S C6S C16S 64(7) 3_766 . ?
C9S C6S C16S 48(3) . . ?
C18S C6S C16S 78(4) . . ?
C11S C6S C16S 85(5) . . ?
C10S C6S C16S 58(4) 3_766 . ?
C15S C6S C8S 99(9) . . ?
C1S C6S C8S 125(8) 3_766 . ?
C12S C6S C8S 64(7) 3_766 . ?
C9S C6S C8S 47(3) . . ?
C18S C6S C8S 100(6) . . ?
C11S C6S C8S 125(7) . . ?
C10S C6S C8S 45(5) 3_766 . ?
C16S C6S C8S 43(5) . . ?
C15S C6S C13S 77(10) . . ?
C1S C6S C13S 150(7) 3_766 . ?
C12S C6S C13S 95(7) 3_766 . ?
C9S C6S C13S 22(3) . . ?
C18S C6S C13S 128(5) . . ?
C11S C6S C13S 137(5) . . ?
C10S C6S C13S 76(5) 3_766 . ?
C16S C6S C13S 54(3) . . ?
C8S C6S C13S 32(4) . . ?
C15S C6S C7S 95(8) . 3_766 ?
C1S C6S C7S 47(5) 3_766 3_766 ?
C12S C6S C7S 39(5) 3_766 3_766 ?
C9S C6S C7S 98(5) . 3_766 ?
C18S C6S C7S 28(5) . 3_766 ?
C11S C6S C7S 47(5) . 3_766 ?
C10S C6S C7S 53(3) 3_766 3_766 ?
C16S C6S C7S 51(3) . 3_766 ?
C8S C6S C7S 80(6) . 3_766 ?
C13S C6S C7S 103(4) . 3_766 ?
C15S C6S C5S 118(9) . 3_766 ?
C1S C6S C5S 49(5) 3_766 3_766 ?
C12S C6S C5S 18(4) 3_766 3_766 ?
C9S C6S C5S 110(4) . 3_766 ?
C18S C6S C5S 24(4) . 3_766 ?
C11S C6S C5S 59(5) . 3_766 ?
C10S C6S C5S 37(3) 3_766 3_766 ?
C16S C6S C5S 63(3) . 3_766 ?
C8S C6S C5S 76(5) . 3_766 ?
C13S C6S C5S 106(4) . 3_766 ?
C7S C6S C5S 23(4) 3_766 3_766 ?
C5S C7S C18S 58(10) . 3_766 ?
C5S C7S C17S 146(10) . . ?
C18S C7S C17S 88(10) 3_766 . ?
C5S C7S C3S 55(9) . . ?
C18S C7S C3S 113(10) 3_766 . ?
C17S C7S C3S 159(10) . . ?
C5S C7S C12S 47(8) . . ?
C18S C7S C12S 48(10) 3_766 . ?
C17S C7S C12S 114(10) . . ?
C3S C7S C12S 79(8) . . ?
C5S C7S C1S 77(10) . . ?
C18S C7S C1S 27(7) 3_766 . ?
C17S C7S C1S 73(7) . . ?
C3S C7S C1S 123(9) . . ?
C12S C7S C1S 44(6) . . ?
C5S C7S C11S 104(10) . 3_766 ?
C18S C7S C11S 46(10) 3_766 3_766 ?
C17S C7S C11S 42(5) . 3_766 ?
C3S C7S C11S 159(10) . 3_766 ?
C12S C7S C11S 82(9) . 3_766 ?
C1S C7S C11S 38(4) . 3_766 ?
C5S C7S C10S 41(8) . . ?
C18S C7S C10S 73(10) 3_766 . ?
C17S C7S C10S 138(10) . . ?
C3S C7S C10S 51(7) . . ?
C12S C7S C10S 29(6) . . ?
C1S C7S C10S 73(6) . . ?
C11S C7S C10S 111(8) 3_766 . ?
C5S C7S C16S 105(10) . 3_766 ?
C18S C7S C16S 106(10) 3_766 3_766 ?
C17S C7S C16S 87(10) . 3_766 ?
C3S C7S C16S 82(8) . 3_766 ?
C12S C7S C16S 69(8) . 3_766 ?
C1S C7S C16S 82(7) . 3_766 ?
C11S C7S C16S 101(8) 3_766 3_766 ?
C10S C7S C16S 64(7) . 3_766 ?
C5S C7S C14S 130(10) . . ?
C18S C7S C14S 144(10) 3_766 . ?
C17S C7S C14S 80(9) . . ?
C3S C7S C14S 80(7) . . ?
C12S C7S C14S 108(9) . . ?
C1S C7S C14S 118(8) . . ?
C11S C7S C14S 116(9) 3_766 . ?
C10S C7S C14S 94(7) . . ?
C16S C7S C14S 41(5) 3_766 . ?
C5S C7S C4S 94(10) . . ?
C18S C7S C4S 149(10) 3_766 . ?
C17S C7S C4S 120(10) . . ?
C3S C7S C4S 38(5) . . ?
C12S C7S C4S 105(8) . . ?
C1S C7S C4S 144(7) . . ?
C11S C7S C4S 160(9) 3_766 . ?
C10S C7S C4S 77(5) . . ?
C16S C7S C4S 66(5) 3_766 . ?
C14S C7S C4S 45(4) . . ?
C5S C7S C6S 78(10) . 3_766 ?
C18S C7S C6S 46(8) 3_766 3_766 ?
C17S C7S C6S 81(9) . 3_766 ?
C3S C7S C6S 109(8) . 3_766 ?
C12S C7S C6S 33(5) . 3_766 ?
C1S C7S C6S 23(3) . 3_766 ?
C11S C7S C6S 57(5) 3_766 3_766 ?
C10S C7S C6S 59(5) . 3_766 ?
C16S C7S C6S 60(6) 3_766 3_766 ?
C14S C7S C6S 99(6) . 3_766 ?
C4S C7S C6S 121(6) . 3_766 ?
C13S C8S C16S 69(6) . 3_766 ?
C13S C8S C10S 144(10) . 3_766 ?
C16S C8S C10S 136(10) 3_766 3_766 ?
C13S C8S C14S 41(7) . . ?
C16S C8S C14S 53(7) 3_766 . ?
C10S C8S C14S 167(10) 3_766 . ?
C13S C8S C9S 37(5) . . ?
C16S C8S C9S 80(5) 3_766 . ?
C10S C8S C9S 112(10) 3_766 . ?
C14S C8S C9S 77(7) . . ?
C13S C8S C16S 91(6) . . ?
C16S C8S C16S 69(7) 3_766 . ?
C10S C8S C16S 80(10) 3_766 . ?
C14S C8S C16S 113(5) . . ?
C9S C8S C16S 61(6) . . ?
C13S C8S C2S 18(4) . . ?
C16S C8S C2S 55(5) 3_766 . ?
C10S C8S C2S 144(10) 3_766 . ?
C14S C8S C2S 46(5) . . ?
C9S C8S C2S 32(3) . . ?
C16S C8S C2S 75(3) . . ?
C13S C8S C12S 115(10) . 3_766 ?
C16S C8S C12S 135(10) 3_766 3_766 ?
C10S C8S C12S 30(5) 3_766 3_766 ?
C14S C8S C12S 155(10) . 3_766 ?
C9S C8S C12S 82(8) . 3_766 ?
C16S C8S C12S 66(9) . 3_766 ?
C2S C8S C12S 114(7) . 3_766 ?
C13S C8S C6S 78(7) . . ?
C16S C8S C6S 124(8) 3_766 . ?
C10S C8S C6S 66(7) 3_766 . ?
C14S C8S C6S 118(8) . . ?
C9S C8S C6S 48(5) . . ?
C16S C8S C6S 68(8) . . ?
C2S C8S C6S 80(5) . . ?
C12S C8S C6S 37(5) 3_766 . ?
C13S C8S C2S 128(6) . 3_766 ?
C16S C8S C2S 68(7) 3_766 3_766 ?
C10S C8S C2S 69(8) 3_766 3_766 ?
C14S C8S C2S 119(6) . 3_766 ?
C9S C8S C2S 107(8) . 3_766 ?
C16S C8S C2S 46(6) . 3_766 ?
C2S C8S C2S 110(4) . 3_766 ?
C12S C8S C2S 79(8) 3_766 3_766 ?
C6S C8S C2S 104(8) . 3_766 ?
C13S C8S C9S 109(5) . 3_766 ?
C16S C8S C9S 43(5) 3_766 3_766 ?
C10S C8S C9S 95(9) 3_766 3_766 ?
C14S C8S C9S 93(6) . 3_766 ?
C9S C8S C9S 104(5) . 3_766 ?
C16S C8S C9S 55(5) . 3_766 ?
C2S C8S C9S 93(3) . 3_766 ?
C12S C8S C9S 105(10) 3_766 3_766 ?
C6S C8S C9S 123(8) . 3_766 ?
C2S C8S C9S 27(2) 3_766 3_766 ?
C13S C8S C8S 79(4) . 3_766 ?
C16S C8S C8S 36(5) 3_766 3_766 ?
C10S C8S C8S 108(10) 3_766 3_766 ?
C14S C8S C8S 84(5) . 3_766 ?
C9S C8S C8S 66(5) . 3_766 ?
C16S C8S C8S 33(5) . 3_766 ?
C2S C8S C8S 61(3) . 3_766 ?
C12S C8S C8S 99(10) 3_766 3_766 ?
C6S C8S C8S 95(8) . 3_766 ?
C2S C8S C8S 49(6) 3_766 3_766 ?
C9S C8S C8S 38(4) 3_766 3_766 ?
C13S C9S C2S 55(6) . . ?
C13S C9S C15S 157(10) . . ?
C2S C9S C15S 140(7) . . ?
C13S C9S C6S 118(8) . . ?
C2S C9S C6S 166(8) . . ?
C15S C9S C6S 42(4) . . ?
C13S C9S C8S 49(9) . . ?
C2S C9S C8S 96(7) . . ?
C15S C9S C8S 124(8) . . ?
C6S C9S C8S 85(6) . . ?
C13S C9S C16S 100(8) . . ?
C2S C9S C16S 109(7) . . ?
C15S C9S C16S 90(8) . . ?
C6S C9S C16S 84(5) . . ?
C8S C9S C16S 60(7) . . ?
C13S C9S C14S 11(6) . . ?
C2S C9S C14S 48(4) . . ?
C15S C9S C14S 168(8) . . ?
C6S C9S C14S 127(5) . . ?
C8S C9S C14S 51(7) . . ?
C16S C9S C14S 94(6) . . ?
C13S C9S C4S 51(6) . . ?
C2S C9S C4S 16(3) . . ?
C15S C9S C4S 137(6) . . ?
C6S C9S C4S 150(6) . . ?
C8S C9S C4S 98(7) . . ?
C16S C9S C4S 124(6) . . ?
C14S C9S C4S 47(4) . . ?
C13S C9S C16S 49(7) . 3_766 ?
C2S C9S C16S 60(4) . 3_766 ?
C15S C9S C16S 147(9) . 3_766 ?
C6S C9S C16S 128(5) . 3_766 ?
C8S C9S C16S 47(5) . 3_766 ?
C16S C9S C16S 57(6) . 3_766 ?
C14S C9S C16S 40(4) . 3_766 ?
C4S C9S C16S 70(3) . 3_766 ?
C13S C9S C8S 91(8) . 3_766 ?
C2S C9S C8S 75(6) . 3_766 ?
C15S C9S C8S 109(8) . 3_766 ?
C6S C9S C8S 119(6) . 3_766 ?
C8S C9S C8S 76(5) . 3_766 ?
C16S C9S C8S 37(5) . 3_766 ?
C14S C9S C8S 81(6) . 3_766 ?
C4S C9S C8S 90(5) . 3_766 ?
C16S C9S C8S 42(5) 3_766 3_766 ?
C13S C9S C12S 101(7) . 3_766 ?
C2S C9S C12S 152(6) . 3_766 ?
C15S C9S C12S 68(5) . 3_766 ?
C6S C9S C12S 33(5) . 3_766 ?
C8S C9S C12S 56(7) . 3_766 ?
C16S C9S C12S 56(6) . 3_766 ?
C14S C9S C12S 106(5) . 3_766 ?
C4S C9S C12S 152(4) . 3_766 ?
C16S C9S C12S 95(5) 3_766 3_766 ?
C8S C9S C12S 93(6) 3_766 3_766 ?
C13S C9S C1S 129(7) . 3_766 ?
C2S C9S C1S 176(6) . 3_766 ?
C15S C9S C1S 37(4) . 3_766 ?
C6S C9S C1S 16(3) . 3_766 ?
C8S C9S C1S 87(6) . 3_766 ?
C16S C9S C1S 71(5) . 3_766 ?
C14S C9S C1S 135(5) . 3_766 ?
C4S C9S C1S 165(5) . 3_766 ?
C16S C9S C1S 123(4) 3_766 3_766 ?
C8S C9S C1S 105(5) 3_766 3_766 ?
C12S C9S C1S 31(4) 3_766 3_766 ?
C12S C10S C5S 52(8) . . ?
C12S C10S C8S 94(10) . 3_766 ?
C5S C10S C8S 129(9) . 3_766 ?
C12S C10S C3S 94(10) . . ?
C5S C10S C3S 47(7) . . ?
C8S C10S C3S 115(10) 3_766 . ?
C12S C10S C7S 49(9) . . ?
C5S C10S C7S 25(6) . . ?
C8S C10S C7S 104(8) 3_766 . ?
C3S C10S C7S 46(5) . . ?
C12S C10S C18S 23(8) . 3_766 ?
C5S C10S C18S 29(5) . 3_766 ?
C8S C10S C18S 112(8) 3_766 3_766 ?
C3S C10S C18S 74(8) . 3_766 ?
C7S C10S C18S 33(5) . 3_766 ?
C12S C10S C16S 70(10) . 3_766 ?
C5S C10S C16S 81(6) . 3_766 ?
C8S C10S C16S 49(6) 3_766 3_766 ?
C3S C10S C16S 75(6) . 3_766 ?
C7S C10S C16S 56(5) . 3_766 ?
C18S C10S C16S 75(6) 3_766 3_766 ?
C12S C10S C6S 28(8) . 3_766 ?
C5S C10S C6S 79(6) . 3_766 ?
C8S C10S C6S 69(6) 3_766 3_766 ?
C3S C10S C6S 114(6) . 3_766 ?
C7S C10S C6S 69(5) . 3_766 ?
C18S C10S C6S 50(4) 3_766 3_766 ?
C16S C10S C6S 62(5) 3_766 3_766 ?
C12S C10S C2S 107(10) . . ?
C5S C10S C2S 84(6) . . ?
C8S C10S C2S 70(7) 3_766 . ?
C3S C10S C2S 47(6) . . ?
C7S C10S C2S 67(5) . . ?
C18S C10S C2S 99(6) 3_766 . ?
C16S C10S C2S 45(4) 3_766 . ?
C6S C10S C2S 106(5) 3_766 . ?
C12S C10S C1S 3(7) . . ?
C5S C10S C1S 54(5) . . ?
C8S C10S C1S 92(7) 3_766 . ?
C3S C10S C1S 95(7) . . ?
C7S C10S C1S 50(4) . . ?
C18S C10S C1S 25(4) 3_766 . ?
C16S C10S C1S 69(5) 3_766 . ?
C6S C10S C1S 25(2) 3_766 . ?
C2S C10S C1S 106(4) . . ?
C12S C10S C4S 101(10) . . ?
C5S C10S C4S 66(5) . . ?
C8S C10S C4S 90(7) 3_766 . ?
C3S C10S C4S 26(6) . . ?
C7S C10S C4S 54(4) . . ?
C18S C10S C4S 86(6) 3_766 . ?
C16S C10S C4S 56(4) 3_766 . ?
C6S C10S C4S 111(4) 3_766 . ?
C2S C10S C4S 21.0(18) . . ?
C1S C10S C4S 101(3) . . ?
C12S C10S C9S 61(9) . 3_766 ?
C5S C10S C9S 101(6) . 3_766 ?
C8S C10S C9S 33(5) 3_766 3_766 ?
C3S C10S C9S 111(6) . 3_766 ?
C7S C10S C9S 80(5) . 3_766 ?
C18S C10S C9S 79(5) 3_766 3_766 ?
C16S C10S C9S 37(4) 3_766 3_766 ?
C6S C10S C9S 38(3) 3_766 3_766 ?
C2S C10S C9S 79(4) . 3_766 ?
C1S C10S C9S 59(4) . 3_766 ?
C4S C10S C9S 93(4) . 3_766 ?
C1S C11S C17S 107(10) 3_766 3_766 ?
C1S C11S C18S 47(7) 3_766 . ?
C17S C11S C18S 84(10) 3_766 . ?
C1S C11S C7S 74(8) 3_766 3_766 ?
C17S C11S C7S 44(7) 3_766 3_766 ?
C18S C11S C7S 40(9) . 3_766 ?
C1S C11S C6S 18(6) 3_766 . ?
C17S C11S C6S 98(8) 3_766 . ?
C18S C11S C6S 60(8) . . ?
C7S C11S C6S 76(6) 3_766 . ?
C1S C11S C15S 50(7) 3_766 . ?
C17S C11S C15S 87(8) 3_766 . ?
C18S C11S C15S 88(9) . . ?
C7S C11S C15S 89(6) 3_766 . ?
C6S C11S C15S 32(3) . . ?
C1S C11S C12S 30(7) 3_766 3_766 ?
C17S C11S C12S 82(9) 3_766 3_766 ?
C18S C11S C12S 24(7) . 3_766 ?
C7S C11S C12S 45(7) 3_766 3_766 ?
C6S C11S C12S 37(4) . 3_766 ?
C15S C11S C12S 64(4) . 3_766 ?
C1S C11S C5S 58(7) 3_766 3_766 ?
C17S C11S C5S 69(8) 3_766 3_766 ?
C18S C11S C5S 16(9) . 3_766 ?
C7S C11S C5S 25(5) 3_766 3_766 ?
C6S C11S C5S 68(4) . 3_766 ?
C15S C11S C5S 91(5) . 3_766 ?
C12S C11S C5S 30(4) 3_766 3_766 ?
C1S C11S C16S 60(6) 3_766 . ?
C17S C11S C16S 48(8) 3_766 . ?
C18S C11S C16S 61(7) . . ?
C7S C11S C16S 42(5) 3_766 . ?
C6S C11S C16S 50(4) . . ?
C15S C11S C16S 48(3) . . ?
C12S C11S C16S 44(5) 3_766 . ?
C5S C11S C16S 54(4) 3_766 . ?
C1S C12S C10S 176(10) . . ?
C1S C12S C18S 46(7) . 3_766 ?
C10S C12S C18S 138(10) . 3_766 ?
C1S C12S C6S 44(5) . 3_766 ?
C10S C12S C6S 132(10) . 3_766 ?
C18S C12S C6S 89(10) 3_766 3_766 ?
C1S C12S C5S 99(8) . . ?
C10S C12S C5S 85(10) . . ?
C18S C12S C5S 53(8) 3_766 . ?
C6S C12S C5S 140(8) 3_766 . ?
C1S C12S C7S 79(5) . . ?
C10S C12S C7S 102(10) . . ?
C18S C12S C7S 47(9) 3_766 . ?
C6S C12S C7S 108(6) 3_766 . ?
C5S C12S C7S 37(8) . . ?
C1S C12S C11S 26(5) . 3_766 ?
C10S C12S C11S 155(10) . 3_766 ?
C18S C12S C11S 27(8) 3_766 3_766 ?
C6S C12S C11S 65(5) 3_766 3_766 ?
C5S C12S C11S 75(7) . 3_766 ?
C7S C12S C11S 53(5) . 3_766 ?
C1S C12S C8S 120(8) . 3_766 ?
C10S C12S C8S 56(10) . 3_766 ?
C18S C12S C8S 149(10) 3_766 3_766 ?
C6S C12S C8S 79(7) 3_766 3_766 ?
C5S C12S C8S 124(10) . 3_766 ?
C7S C12S C8S 110(10) . 3_766 ?
C11S C12S C8S 127(6) 3_766 3_766 ?
C1S C12S C15S 44(6) . 3_766 ?
C10S C12S C15S 131(10) . 3_766 ?
C18S C12S C15S 83(9) 3_766 3_766 ?
C6S C12S C15S 22(4) 3_766 3_766 ?
C5S C12S C15S 124(8) . 3_766 ?
C7S C12S C15S 88(6) . 3_766 ?
C11S C12S C15S 56(5) 3_766 3_766 ?
C8S C12S C15S 76(6) 3_766 3_766 ?
C1S C12S C3S 127(9) . . ?
C10S C12S C3S 55(10) . . ?
C18S C12S C3S 86(10) 3_766 . ?
C6S C12S C3S 147(10) 3_766 . ?
C5S C12S C3S 36(8) . . ?
C7S C12S C3S 48(7) . . ?
C11S C12S C3S 101(8) 3_766 . ?
C8S C12S C3S 88(10) 3_766 . ?
C15S C12S C3S 125(8) 3_766 . ?
C1S C12S C16S 95(7) . 3_766 ?
C10S C12S C16S 82(10) . 3_766 ?
C18S C12S C16S 102(10) 3_766 3_766 ?
C6S C12S C16S 79(6) 3_766 3_766 ?
C5S C12S C16S 94(10) . 3_766 ?
C7S C12S C16S 65(7) . 3_766 ?
C11S C12S C16S 86(5) 3_766 3_766 ?
C8S C12S C16S 47(6) 3_766 3_766 ?
C15S C12S C16S 60(4) 3_766 3_766 ?
C3S C12S C16S 71(8) . 3_766 ?
C1S C12S C17S 54(5) . . ?
C10S C12S C17S 127(10) . . ?
C18S C12S C17S 40(9) 3_766 . ?
C6S C12S C17S 80(5) 3_766 . ?
C5S C12S C17S 62(6) . . ?
C7S C12S C17S 29(5) . . ?
C11S C12S C17S 30(4) 3_766 . ?
C8S C12S C17S 109(7) 3_766 . ?
C15S C12S C17S 61(5) 3_766 . ?
C3S C12S C17S 76(6) . . ?
C16S C12S C17S 62(5) 3_766 . ?
C9S C13S C2S 69(6) . . ?
C9S C13S C14S 159(10) . . ?
C2S C13S C14S 97(10) . . ?
C9S C13S C8S 94(10) . . ?
C2S C13S C8S 139(10) . . ?
C14S C13S C8S 87(10) . . ?
C9S C13S C16S 102(10) . 3_766 ?
C2S C13S C16S 83(7) . 3_766 ?
C14S C13S C16S 60(7) . 3_766 ?
C8S C13S C16S 63(7) . 3_766 ?
C9S C13S C4S 100(7) . . ?
C2S C13S C4S 36(5) . . ?
C14S C13S C4S 73(9) . . ?
C8S C13S C4S 156(9) . . ?
C16S C13S C4S 94(5) 3_766 . ?
C9S C13S C16S 52(7) . . ?
C2S C13S C16S 90(7) . . ?
C14S C13S C16S 115(10) . . ?
C8S C13S C16S 52(8) . . ?
C16S C13S C16S 57(7) 3_766 . ?
C4S C13S C16S 124(5) . . ?
C9S C13S C6S 40(6) . . ?
C2S C13S C6S 108(7) . . ?
C14S C13S C6S 155(9) . . ?
C8S C13S C6S 71(8) . . ?
C16S C13S C6S 116(6) 3_766 . ?
C4S C13S C6S 131(5) . . ?
C16S C13S C6S 61(4) . . ?
C9S C13S C15S 13(6) . . ?
C2S C13S C15S 79(6) . . ?
C14S C13S C15S 172(9) . . ?
C8S C13S C15S 92(10) . . ?
C16S C13S C15S 113(7) 3_766 . ?
C4S C13S C15S 106(5) . . ?
C16S C13S C15S 59(5) . . ?
C6S C13S C15S 28(3) . . ?
C9S C13S C3S 98(7) . . ?
C2S C13S C3S 31(6) . . ?
C14S C13S C3S 66(8) . . ?
C8S C13S C3S 129(7) . . ?
C16S C13S C3S 65(4) 3_766 . ?
C4S C13S C3S 30(3) . . ?
C16S C13S C3S 100(6) . . ?
C6S C13S C3S 138(5) . . ?
C15S C13S C3S 110(5) . . ?
C9S C13S C8S 67(8) . 3_766 ?
C2S C13S C8S 65(6) . 3_766 ?
C14S C13S C8S 93(8) . 3_766 ?
C8S C13S C8S 74(6) . 3_766 ?
C16S C13S C8S 36(6) 3_766 3_766 ?
C4S C13S C8S 93(4) . 3_766 ?
C16S C13S C8S 35(4) . 3_766 ?
C6S C13S C8S 92(5) . 3_766 ?
C15S C13S C8S 79(5) . 3_766 ?
C3S C13S C8S 66(5) . 3_766 ?
C9S C13S C10S 78(7) . 3_766 ?
C2S C13S C10S 139(8) . 3_766 ?
C14S C13S C10S 107(9) . 3_766 ?
C8S C13S C10S 21(8) . 3_766 ?
C16S C13S C10S 81(5) 3_766 3_766 ?
C4S C13S C10S 174(6) . 3_766 ?
C16S C13S C10S 50(4) . 3_766 ?
C6S C13S C10S 50(4) . 3_766 ?
C15S C13S C10S 73(4) . 3_766 ?
C3S C13S C10S 144(5) . 3_766 ?
C8S C13S C10S 80(4) 3_766 3_766 ?
C13S C14S C16S 79(8) . 3_766 ?
C13S C14S C2S 40(6) . . ?
C16S C14S C2S 74(7) 3_766 . ?
C13S C14S C4S 68(9) . . ?
C16S C14S C4S 100(8) 3_766 . ?
C2S C14S C4S 36(4) . . ?
C13S C14S C8S 52(7) . . ?
C16S C14S C8S 60(7) 3_766 . ?
C2S C14S C8S 84(7) . . ?
C4S C14S C8S 119(9) . . ?
C13S C14S C9S 10(6) . . ?
C16S C14S C9S 71(7) 3_766 . ?
C2S C14S C9S 34(3) . . ?
C4S C14S C9S 66(5) . . ?
C8S C14S C9S 53(6) . . ?
C13S C14S C7S 126(9) . . ?
C16S C14S C7S 70(6) 3_766 . ?
C2S C14S C7S 88(5) . . ?
C4S C14S C7S 74(5) . . ?
C8S C14S C7S 130(8) . . ?
C9S C14S C7S 117(6) . . ?
C13S C14S C17S 155(9) . . ?
C16S C14S C17S 78(8) 3_766 . ?
C2S C14S C17S 123(6) . . ?
C4S C14S C17S 107(6) . . ?
C8S C14S C17S 122(9) . . ?
C9S C14S C17S 145(6) . . ?
C7S C14S C17S 35(4) . . ?
C13S C14S C3S 90(9) . . ?
C16S C14S C3S 75(7) 3_766 . ?
C2S C14S C3S 50(5) . . ?
C4S C14S C3S 37(4) . . ?
C8S C14S C3S 124(8) . . ?
C9S C14S C3S 82(6) . . ?
C7S C14S C3S 40(4) . . ?
C17S C14S C3S 75(5) . . ?
C13S C14S C5S 110(8) . . ?
C16S C14S C5S 64(6) 3_766 . ?
C2S C14S C5S 73(4) . . ?
C4S C14S C5S 63(4) . . ?
C8S C14S C5S 123(6) . . ?
C9S C14S C5S 101(5) . . ?
C7S C14S C5S 16(4) . . ?
C17S C14S C5S 50(3) . . ?
C3S C14S C5S 27(4) . . ?
C13S C14S C16S 45(7) . . ?
C16S C14S C16S 37(7) 3_766 . ?
C2S C14S C16S 59(4) . . ?
C4S C14S C16S 94(5) . . ?
C8S C14S C16S 34(5) . . ?
C9S C14S C16S 38(3) . . ?
C7S C14S C16S 103(5) . . ?
C17S C14S C16S 115(6) . . ?
C3S C14S C16S 89(5) . . ?
C5S C14S C16S 92(4) . . ?
C13S C14S C8S 66(7) . 3_766 ?
C16S C14S C8S 18(6) 3_766 3_766 ?
C2S C14S C8S 56(4) . 3_766 ?
C4S C14S C8S 83(4) . 3_766 ?
C8S C14S C8S 63(4) . 3_766 ?
C9S C14S C8S 56(4) . 3_766 ?
C7S C14S C8S 72(5) . 3_766 ?
C17S C14S C8S 90(5) . 3_766 ?
C3S C14S C8S 64(5) . 3_766 ?
C5S C14S C8S 62(4) . 3_766 ?
C16S C14S C8S 31(3) . 3_766 ?
C6S C15S C9S 82(9) . . ?
C6S C15S C1S 38(6) . 3_766 ?
C9S C15S C1S 113(5) . 3_766 ?
C6S C15S C11S 72(9) . . ?
C9S C15S C11S 133(6) . . ?
C1S C15S C11S 34(5) 3_766 . ?
C6S C15S C16S 77(6) . . ?
C9S C15S C16S 50(4) . . ?
C1S C15S C16S 82(4) 3_766 . ?
C11S C15S C16S 85(6) . . ?
C6S C15S C12S 27(6) . 3_766 ?
C9S C15S C12S 78(5) . 3_766 ?
C1S C15S C12S 35(4) 3_766 3_766 ?
C11S C15S C12S 60(4) . 3_766 ?
C16S C15S C12S 54(5) . 3_766 ?
C6S C15S C17S 84(9) . 3_766 ?
C9S C15S C17S 110(6) . 3_766 ?
C1S C15S C17S 53(6) 3_766 3_766 ?
C11S C15S C17S 30(4) . 3_766 ?
C16S C15S C17S 60(4) . 3_766 ?
C12S C15S C17S 61(4) 3_766 3_766 ?
C6S C15S C13S 75(9) . . ?
C9S C15S C13S 9(5) . . ?
C1S C15S C13S 108(6) 3_766 . ?
C11S C15S C13S 132(5) . . ?
C16S C15S C13S 55(5) . . ?
C12S C15S C13S 74(5) 3_766 . ?
C17S C15S C13S 114(4) 3_766 . ?
C6S C15S C2S 99(10) . . ?
C9S C15S C2S 18(4) . . ?
C1S C15S C2S 130(6) 3_766 . ?
C11S C15S C2S 146(5) . . ?
C16S C15S C2S 61(4) . . ?
C12S C15S C2S 96(6) 3_766 . ?
C17S C15S C2S 119(4) 3_766 . ?
C13S C15S C2S 24(3) . . ?
C6S C15S C18S 44(8) . . ?
C9S C15S C18S 105(5) . . ?
C1S C15S C18S 16(4) 3_766 . ?
C11S C15S C18S 32(4) . . ?
C16S C15S C18S 67(4) . . ?
C12S C15S C18S 28(4) 3_766 . ?
C17S C15S C18S 40(5) 3_766 . ?
C13S C15S C18S 102(5) . . ?
C2S C15S C18S 122(4) . . ?
C6S C15S C8S 56(7) . . ?
C9S C15S C8S 30(4) . . ?
C1S C15S C8S 82(4) 3_766 . ?
C11S C15S C8S 105(6) . . ?
C16S C15S C8S 38(5) . . ?
C12S C15S C8S 48(5) 3_766 . ?
C17S C15S C8S 91(5) 3_766 . ?
C13S C15S C8S 28(4) . . ?
C2S C15S C8S 48(4) . . ?
C18S C15S C8S 75(5) . . ?
C6S C15S C7S 60(7) . 3_766 ?
C9S C15S C7S 92(5) . 3_766 ?
C1S C15S C7S 41(4) 3_766 3_766 ?
C11S C15S C7S 41(5) . 3_766 ?
C16S C15S C7S 46(3) . 3_766 ?
C12S C15S C7S 35(4) 3_766 3_766 ?
C17S C15S C7S 27(3) 3_766 3_766 ?
C13S C15S C7S 93(4) . 3_766 ?
C2S C15S C7S 106(4) . 3_766 ?
C18S C15S C7S 25(4) . 3_766 ?
C8S C15S C7S 66(5) . 3_766 ?
C14S C16S C8S 66(10) 3_766 3_766 ?
C14S C16S C13S 41(6) 3_766 3_766 ?
C8S C16S C13S 48(8) 3_766 3_766 ?
C14S C16S C8S 147(10) 3_766 . ?
C8S C16S C8S 111(7) 3_766 . ?
C13S C16S C8S 111(9) 3_766 . ?
C14S C16S C2S 56(6) 3_766 3_766 ?
C8S C16S C2S 79(8) 3_766 3_766 ?
C13S C16S C2S 34(4) 3_766 3_766 ?
C8S C16S C2S 90(8) . 3_766 ?
C14S C16S C9S 153(10) 3_766 . ?
C8S C16S C9S 100(7) 3_766 . ?
C13S C16S C9S 144(7) 3_766 . ?
C8S C16S C9S 59(6) . . ?
C2S C16S C9S 147(9) 3_766 . ?
C14S C16S C16S 116(10) 3_766 3_766 ?
C8S C16S C16S 59(8) 3_766 3_766 ?
C13S C16S C16S 76(9) 3_766 3_766 ?
C8S C16S C16S 52(8) . 3_766 ?
C2S C16S C16S 81(8) 3_766 3_766 ?
C9S C16S C16S 71(6) . 3_766 ?
C14S C16S C9S 69(8) 3_766 3_766 ?
C8S C16S C9S 53(6) 3_766 3_766 ?
C13S C16S C9S 29(4) 3_766 3_766 ?
C8S C16S C9S 83(7) . 3_766 ?
C2S C16S C9S 34(3) 3_766 3_766 ?
C9S C16S C9S 123(6) . 3_766 ?
C16S C16S C9S 52(6) 3_766 3_766 ?
C14S C16S C7S 69(6) 3_766 3_766 ?
C8S C16S C7S 135(10) 3_766 3_766 ?
C13S C16S C7S 100(7) 3_766 3_766 ?
C8S C16S C7S 109(10) . 3_766 ?
C2S C16S C7S 82(4) 3_766 3_766 ?
C9S C16S C7S 117(8) . 3_766 ?
C16S C16S C7S 154(10) 3_766 3_766 ?
C9S C16S C7S 115(6) 3_766 3_766 ?
C14S C16S C10S 112(6) 3_766 3_766 ?
C8S C16S C10S 148(10) 3_766 3_766 ?
C13S C16S C10S 109(7) 3_766 3_766 ?
C8S C16S C10S 51(8) . 3_766 ?
C2S C16S C10S 75(5) 3_766 3_766 ?
C9S C16S C10S 91(8) . 3_766 ?
C16S C16S C10S 97(10) 3_766 3_766 ?
C9S C16S C10S 95(7) 3_766 3_766 ?
C7S C16S C10S 59(5) 3_766 3_766 ?
C14S C16S C13S 160(9) 3_766 . ?
C8S C16S C13S 94(9) 3_766 . ?
C13S C16S C13S 123(7) 3_766 . ?
C8S C16S C13S 37(5) . . ?
C2S C16S C13S 120(7) 3_766 . ?
C9S C16S C13S 28(3) . . ?
C16S C16S C13S 47(6) 3_766 . ?
C9S C16S C13S 97(5) 3_766 . ?
C7S C16S C13S 131(9) 3_766 . ?
C10S C16S C13S 83(7) 3_766 . ?
C14S C16S C17S 66(7) 3_766 3_766 ?
C8S C16S C17S 117(10) 3_766 3_766 ?
C13S C16S C17S 106(7) 3_766 3_766 ?
C8S C16S C17S 131(9) . 3_766 ?
C2S C16S C17S 105(5) 3_766 3_766 ?
C9S C16S C17S 104(7) . 3_766 ?
C16S C16S C17S 172(9) 3_766 3_766 ?
C9S C16S C17S 133(7) 3_766 3_766 ?
C7S C16S C17S 33(4) 3_766 3_766 ?
C10S C16S C17S 89(5) 3_766 3_766 ?
C13S C16S C17S 130(7) . 3_766 ?
C11S C17S C7S 94(9) 3_766 . ?
C11S C17S C18S 50(6) 3_766 3_766 ?
C7S C17S C18S 44(6) . 3_766 ?
C11S C17S C1S 37(6) 3_766 . ?
C7S C17S C1S 68(6) . . ?
C18S C17S C1S 31(4) 3_766 . ?
C11S C17S C5S 79(7) 3_766 . ?
C7S C17S C5S 15(7) . . ?
C18S C17S C5S 29(4) 3_766 . ?
C1S C17S C5S 56(4) . . ?
C11S C17S C14S 144(10) 3_766 . ?
C7S C17S C14S 65(8) . . ?
C18S C17S C14S 102(7) 3_766 . ?
C1S C17S C14S 107(6) . . ?
C5S C17S C14S 78(5) . . ?
C11S C17S C16S 109(10) 3_766 3_766 ?
C7S C17S C16S 60(8) . 3_766 ?
C18S C17S C16S 78(8) 3_766 3_766 ?
C1S C17S C16S 73(6) . 3_766 ?
C5S C17S C16S 66(5) . 3_766 ?
C14S C17S C16S 36(4) . 3_766 ?
C11S C17S C15S 63(8) 3_766 3_766 ?
C7S C17S C15S 92(9) . 3_766 ?
C18S C17S C15S 71(7) 3_766 3_766 ?
C1S C17S C15S 43(4) . 3_766 ?
C5S C17S C15S 87(5) . 3_766 ?
C14S C17S C15S 88(6) . 3_766 ?
C16S C17S C15S 55(5) 3_766 3_766 ?
C11S C17S C6S 54(7) 3_766 3_766 ?
C7S C17S C6S 69(7) . 3_766 ?
C18S C17S C6S 45(6) 3_766 3_766 ?
C1S C17S C6S 21(3) . 3_766 ?
C5S C17S C6S 61(4) . 3_766 ?
C14S C17S C6S 90(5) . 3_766 ?
C16S C17S C6S 55(5) 3_766 3_766 ?
C15S C17S C6S 27(2) 3_766 3_766 ?
C11S C17S C12S 68(8) 3_766 . ?
C7S C17S C12S 37(8) . . ?
C18S C17S C12S 27(6) 3_766 . ?
C1S C17S C12S 34(5) . . ?
C5S C17S C12S 29(3) . . ?
C14S C17S C12S 79(6) . . ?
C16S C17S C12S 52(6) 3_766 . ?
C15S C17S C12S 57(4) 3_766 . ?
C6S C17S C12S 32(3) 3_766 . ?
C11S C17S C3S 105(8) 3_766 . ?
C7S C17S C3S 12(7) . . ?
C18S C17S C3S 55(5) 3_766 . ?
C1S C17S C3S 78(4) . . ?
C5S C17S C3S 26(3) . . ?
C14S C17S C3S 54(4) . . ?
C16S C17S C3S 55(5) 3_766 . ?
C15S C17S C3S 96(6) 3_766 . ?
C6S C17S C3S 76(4) 3_766 . ?
C12S C17S C3S 45(5) . . ?
C11S C17S C4S 132(8) 3_766 . ?
C7S C17S C4S 39(7) . . ?
C18S C17S C4S 82(6) 3_766 . ?
C1S C17S C4S 100(4) . . ?
C5S C17S C4S 53(4) . . ?
C14S C17S C4S 30(3) . . ?
C16S C17S C4S 48(3) 3_766 . ?
C15S C17S C4S 102(5) 3_766 . ?
C6S C17S C4S 91(4) 3_766 . ?
C12S C17S C4S 66(5) . . ?
C3S C17S C4S 27(2) . . ?
C1S C18S C7S 120(10) 3_766 3_766 ?
C1S C18S C5S 137(10) 3_766 3_766 ?
C7S C18S C5S 51(9) 3_766 3_766 ?
C1S C18S C12S 75(10) 3_766 3_766 ?
C7S C18S C12S 85(10) 3_766 3_766 ?
C5S C18S C12S 63(10) 3_766 3_766 ?
C1S C18S C11S 62(9) 3_766 . ?
C7S C18S C11S 94(10) 3_766 . ?
C5S C18S C11S 145(10) 3_766 . ?
C12S C18S C11S 129(10) 3_766 . ?
C1S C18S C17S 89(10) 3_766 3_766 ?
C7S C18S C17S 49(10) 3_766 3_766 ?
C5S C18S C17S 99(10) 3_766 3_766 ?
C12S C18S C17S 113(10) 3_766 3_766 ?
C11S C18S C17S 46(9) . 3_766 ?
C1S C18S C6S 26(7) 3_766 . ?
C7S C18S C6S 106(10) 3_766 . ?
C5S C18S C6S 111(10) 3_766 . ?
C12S C18S C6S 50(9) 3_766 . ?
C11S C18S C6S 82(9) . . ?
C17S C18S C6S 94(8) 3_766 . ?
C1S C18S C10S 95(10) 3_766 3_766 ?
C7S C18S C10S 74(9) 3_766 3_766 ?
C5S C18S C10S 44(9) 3_766 3_766 ?
C12S C18S C10S 20(8) 3_766 3_766 ?
C11S C18S C10S 144(10) . 3_766 ?
C17S C18S C10S 113(8) 3_766 3_766 ?
C6S C18S C10S 69(7) . 3_766 ?
C1S C18S C3S 131(10) 3_766 3_766 ?
C7S C18S C3S 38(8) 3_766 3_766 ?
C5S C18S C3S 14(8) 3_766 3_766 ?
C12S C18S C3S 62(10) 3_766 3_766 ?
C11S C18S C3S 133(10) . 3_766 ?
C17S C18S C3S 87(7) 3_766 3_766 ?
C6S C18S C3S 106(7) . 3_766 ?
C10S C18S C3S 44(5) 3_766 3_766 ?
C1S C18S C15S 28(7) 3_766 . ?
C7S C18S C15S 93(10) 3_766 . ?
C5S C18S C15S 120(10) 3_766 . ?
C12S C18S C15S 69(8) 3_766 . ?
C11S C18S C15S 60(8) . . ?
C17S C18S C15S 68(7) 3_766 . ?
C6S C18S C15S 26(4) . . ?
C10S C18S C15S 86(7) 3_766 . ?
C3S C18S C15S 109(6) 3_766 . ?
C1S C18S C16S 77(8) 3_766 . ?
C7S C18S C16S 48(8) 3_766 . ?
C5S C18S C16S 70(8) 3_766 . ?
C12S C18S C16S 51(9) 3_766 . ?
C11S C18S C16S 93(9) . . ?
C17S C18S C16S 62(6) 3_766 . ?
C6S C18S C16S 58(4) . . ?
C10S C18S C16S 54(5) 3_766 . ?
C3S C18S C16S 58(5) 3_766 . ?
C15S C18S C16S 52(4) . . ?
C1S C18S C14S 98(10) 3_766 3_766 ?
C7S C18S C14S 23(8) 3_766 3_766 ?
C5S C18S C14S 63(9) 3_766 3_766 ?
C12S C18S C14S 74(10) 3_766 3_766 ?
C11S C18S C14S 87(10) . 3_766 ?
C17S C18S C14S 44(5) 3_766 3_766 ?
C6S C18S C14S 84(5) . 3_766 ?
C10S C18S C14S 69(5) 3_766 3_766 ?
C3S C18S C14S 49(4) 3_766 3_766 ?
C15S C18S C14S 70(4) . 3_766 ?
C16S C18S C14S 27(3) . 3_766 ?
 
loop_
 _geom_torsion_atom_site_label_1
 _geom_torsion_atom_site_label_2
 _geom_torsion_atom_site_label_3
 _geom_torsion_atom_site_label_4
 _geom_torsion
 _geom_torsion_site_symmetry_1
 _geom_torsion_site_symmetry_2
 _geom_torsion_site_symmetry_3
 _geom_torsion_site_symmetry_4
 _geom_torsion_publ_flag
C14 C1 O1 C15 -87.80(19) . . . . ?
C2 C1 O1 C15 135.78(17) . . . . ?
C8 C1 O1 C15 24.3(2) . . . . ?
C14 C1 O1 C15A -140.2(3) . . . . ?
C2 C1 O1 C15A 83.4(3) . . . . ?
C8 C1 O1 C15A -28.1(3) . . . . ?
O1 C1 C2 C3 67.6(3) . . . . ?
C14 C1 C2 C3 -65.7(3) . . . . ?
C8 C1 C2 C3 178.5(2) . . . . ?
O1 C1 C2 C6 -112.16(16) . . . . ?
C14 C1 C2 C6 114.52(18) . . . . ?
C8 C1 C2 C6 -1.27(19) . . . . ?
C6 C2 C3 C4 -2.1(2) . . . . ?
C1 C2 C3 C4 178.2(2) . . . . ?
C6 C2 C3 Si1 -179.32(15) . . . . ?
C1 C2 C3 Si1 0.9(4) . . . . ?
C2 C3 C4 O4 -173.9(2) . . . . ?
Si1 C3 C4 O4 3.8(3) . . . . ?
C2 C3 C4 C5 4.8(2) . . . . ?
Si1 C3 C4 C5 -177.58(14) . . . . ?
O4 C4 C5 C6 173.3(2) . . . . ?
C3 C4 C5 C6 -5.4(2) . . . . ?
C6 C7 C8 O8 109.29(18) . . . . ?
C6 C7 C8 C9 -118.18(19) . . . . ?
C6 C7 C8 C1 -2.2(2) . . . . ?
O1 C1 C8 O8 1.56(18) . . . . ?
C14 C1 C8 O8 119.60(16) . . . . ?
C2 C1 C8 O8 -114.78(16) . . . . ?
O1 C1 C8 C7 118.34(16) . . . . ?
C14 C1 C8 C7 -123.61(16) . . . . ?
C2 C1 C8 C7 2.01(18) . . . . ?
O1 C1 C8 C9 -115.27(16) . . . . ?
C14 C1 C8 C9 2.77(19) . . . . ?
C2 C1 C8 C9 128.39(16) . . . . ?
C7 C8 O8 C15A -82.9(3) . . . . ?
C9 C8 O8 C15A 140.5(3) . . . . ?
C1 C8 O8 C15A 28.9(3) . . . . ?
C7 C8 O8 C15 -137.93(18) . . . . ?
C9 C8 O8 C15 85.50(19) . . . . ?
C1 C8 O8 C15 -26.2(2) . . . . ?
O8 C8 C9 C10 65.4(3) . . . . ?
C7 C8 C9 C10 -67.1(3) . . . . ?
C1 C8 C9 C10 176.9(2) . . . . ?
O8 C8 C9 C13 -113.16(17) . . . . ?
C7 C8 C9 C13 114.35(18) . . . . ?
C1 C8 C9 C13 -1.7(2) . . . . ?
C13 C9 C10 C11 0.1(3) . . . . ?
C8 C9 C10 C11 -178.4(2) . . . . ?
C13 C9 C10 Si2 -175.35(17) . . . . ?
C8 C9 C10 Si2 6.2(4) . . . . ?
C9 C10 C11 O11 -179.5(3) . . . . ?
Si2 C10 C11 O11 -3.4(4) . . . . ?
C9 C10 C11 C12 1.0(3) . . . . ?
Si2 C10 C11 C12 177.13(17) . . . . ?
O11 C11 C12 C13 178.9(3) . . . . ?
C10 C11 C12 C13 -1.6(3) . . . . ?
C10 C9 C13 C14 -179.15(19) . . . . ?
C8 C9 C13 C14 -0.2(2) . . . . ?
C10 C9 C13 C12 -1.1(3) . . . . ?
C8 C9 C13 C12 177.84(18) . . . . ?
C11 C12 C13 C14 178.9(3) . . . . ?
C11 C12 C13 C9 1.6(3) . . . . ?
C9 C13 C14 C1 2.1(3) . . . . ?
C12 C13 C14 C1 -175.0(3) . . . . ?
O1 C1 C14 C13 108.48(19) . . . . ?
C2 C1 C14 C13 -118.9(2) . . . . ?
C8 C1 C14 C13 -3.1(2) . . . . ?
C1 O1 C15 O8 -41.7(2) . . . . ?
C15A O1 C15 O8 51.5(4) . . . . ?
C1 O1 C15 C1' -160.97(18) . . . . ?
C15A O1 C15 C1' -67.7(4) . . . . ?
C15A O8 C15 O1 -56.4(4) . . . . ?
C8 O8 C15 O1 42.4(2) . . . . ?
C15A O8 C15 C1' 60.8(4) . . . . ?
C8 O8 C15 C1' 159.6(2) . . . . ?
O1 C15 C1' C2' 59.9(3) . . . . ?
O8 C15 C1' C2' -54.0(3) . . . . ?
O1 C15 C1' C6' -116.0(2) . . . . ?
O8 C15 C1' C6' 130.1(2) . . . . ?
C6' C1' C2' C3' 0.0 . . . . ?
C15 C1' C2' C3' -175.9(2) . . . . ?
C1' C2' C3' C4' 0.0 . . . . ?
C2' C3' C4' O4' 179.7(3) . . . . ?
C2' C3' C4' C5' 0.0 . . . . ?
O4' C4' C5' C6' -179.7(3) . . . . ?
C3' C4' C5' C6' 0.0 . . . . ?
C4' C5' C6' C1' 0.0 . . . . ?
C2' C1' C6' C5' 0.0 . . . . ?
C15 C1' C6' C5' 175.9(2) . . . . ?
C3' C4' O4' C7' 179.0(4) . . . . ?
C5' C4' O4' C7' -1.3(5) . . . . ?
C8 O8 C15A C1'A -160.8(4) . . . . ?
C15 O8 C15A C1'A -64.3(5) . . . . ?
C8 O8 C15A O1 -46.6(4) . . . . ?
C15 O8 C15A O1 50.0(3) . . . . ?
C15 O1 C15A O8 -53.6(3) . . . . ?
C1 O1 C15A O8 46.9(4) . . . . ?
C15 O1 C15A C1'A 60.9(4) . . . . ?
C1 O1 C15A C1'A 161.4(4) . . . . ?
O8 C15A C1'A C2'A 31.6(7) . . . . ?
O1 C15A C1'A C2'A -77.6(6) . . . . ?
O8 C15A C1'A C6'A -149.2(5) . . . . ?
O1 C15A C1'A C6'A 101.7(5) . . . . ?
C6'A C1'A C2'A C3'A 0.0 . . . . ?
C15A C1'A C2'A C3'A 179.2(6) . . . . ?
C1'A C2'A C3'A C4'A 0.0 . . . . ?
C2'A C3'A C4'A C5'A 0.0 . . . . ?
C2'A C3'A C4'A O4'A -175.1(8) . . . . ?
C3'A C4'A C5'A C6'A 0.0 . . . . ?
O4'A C4'A C5'A C6'A 173.1(12) . . . . ?
C4'A C5'A C6'A C1'A 0.0 . . . . ?
C2'A C1'A C6'A C5'A 0.0 . . . . ?
C15A C1'A C6'A C5'A -179.3(6) . . . . ?
C5'A C4'A O4'A C7'A -12(2) . . . . ?
C3'A C4'A O4'A C7'A 161.4(14) . . . . ?
C2 C3 Si1 C1A -143.5(2) . . . . ?
C4 C3 Si1 C1A 39.60(19) . . . . ?
C2 C3 Si1 C1G -20.3(2) . . . . ?
C4 C3 Si1 C1G 162.78(16) . . . . ?
C2 C3 Si1 C1D 98.7(2) . . . . ?
C4 C3 Si1 C1D -78.17(19) . . . . ?
C1G Si1 C1A C1C -73.7(2) . . . . ?
C1D Si1 C1A C1C 164.5(2) . . . . ?
C3 Si1 C1A C1C 47.1(2) . . . . ?
C1G Si1 C1A C1B 53.6(2) . . . . ?
C1D Si1 C1A C1B -68.3(2) . . . . ?
C3 Si1 C1A C1B 174.33(19) . . . . ?
C1A Si1 C1D C1F 179.4(2) . . . . ?
C1G Si1 C1D C1F 55.9(2) . . . . ?
C3 Si1 C1D C1F -62.4(2) . . . . ?
C1A Si1 C1D C1E -53.8(2) . . . . ?
C1G Si1 C1D C1E -177.4(2) . . . . ?
C3 Si1 C1D C1E 64.3(2) . . . . ?
C1A Si1 C1G C1I 44.8(2) . . . . ?
C1D Si1 C1G C1I 165.88(17) . . . . ?
C3 Si1 C1G C1I -76.26(18) . . . . ?
C1A Si1 C1G C1H -82.9(2) . . . . ?
C1D Si1 C1G C1H 38.2(2) . . . . ?
C3 Si1 C1G C1H 156.1(2) . . . . ?
C9 C10 Si2 C2D -147.5(2) . . . . ?
C11 C10 Si2 C2D 37.6(2) . . . . ?
C9 C10 Si2 C2A -23.6(3) . . . . ?
C11 C10 Si2 C2A 161.6(2) . . . . ?
C9 C10 Si2 C2G 95.1(2) . . . . ?
C11 C10 Si2 C2G -79.7(2) . . . . ?
C2D Si2 C2A C2C 48.9(2) . . . . ?
C2G Si2 C2A C2C 170.5(2) . . . . ?
C10 Si2 C2A C2C -73.3(2) . . . . ?
C2D Si2 C2A C2B -79.4(3) . . . . ?
C2G Si2 C2A C2B 42.2(3) . . . . ?
C10 Si2 C2A C2B 158.4(3) . . . . ?
C2A Si2 C2D C2F -74.9(3) . . . . ?
C2G Si2 C2D C2F 162.5(3) . . . . ?
C10 Si2 C2D C2F 46.6(3) . . . . ?
C2A Si2 C2D C2E 53.4(3) . . . . ?
C2G Si2 C2D C2E -69.2(3) . . . . ?
C10 Si2 C2D C2E 174.9(2) . . . . ?
C2D Si2 C2G C2I 179.6(3) . . . . ?
C2A Si2 C2G C2I 55.5(3) . . . . ?
C10 Si2 C2G C2I -62.2(3) . . . . ?
C2D Si2 C2G C2H -54.7(3) . . . . ?
C2A Si2 C2G C2H -178.8(2) . . . . ?
C10 Si2 C2G C2H 63.6(3) . . . . ?
C8 C7 C6 C2 1.5(2) . . . . ?
C8 C7 C6 C5 -176.3(2) . . . . ?
C3 C2 C6 C7 -179.88(17) . . . . ?
C1 C2 C6 C7 -0.1(2) . . . . ?
C3 C2 C6 C5 -1.4(2) . . . . ?
C1 C2 C6 C5 178.43(16) . . . . ?
C4 C5 C6 C7 -178.0(2) . . . . ?
C4 C5 C6 C2 4.1(2) . . . . ?
C13S C2S C3S C5S 44(19) . . . . ?
C4S C2S C3S C5S 123(15) . . . . ?
C9S C2S C3S C5S -64(26) . . . . ?
C14S C2S C3S C5S 48(13) . . . . ?
C16S C2S C3S C5S -1(13) 3_766 . . . ?
C8S C2S C3S C5S 14(18) . . . . ?
C10S C2S C3S C5S -53(10) . . . . ?
C8S C2S C3S C5S -45(13) 3_766 . . . ?
C16S C2S C3S C5S -38(16) . . . . ?
C15S C2S C3S C5S -111(13) . . . . ?
C7S C2S C3S C5S 30(10) . . . . ?
C13S C2S C3S C4S -79(14) . . . . ?
C9S C2S C3S C4S 173(20) . . . . ?
C14S C2S C3S C4S -75(7) . . . . ?
C16S C2S C3S C4S -125(9) 3_766 . . . ?
C8S C2S C3S C4S -109(11) . . . . ?
C10S C2S C3S C4S -176(10) . . . . ?
C8S C2S C3S C4S -168(7) 3_766 . . . ?
C16S C2S C3S C4S -162(8) . . . . ?
C15S C2S C3S C4S 125(10) . . . . ?
C7S C2S C3S C4S -94(10) . . . . ?
C13S C2S C3S C7S 14(15) . . . . ?
C4S C2S C3S C7S 94(10) . . . . ?
C9S C2S C3S C7S -93(21) . . . . ?
C14S C2S C3S C7S 19(9) . . . . ?
C16S C2S C3S C7S -31(9) 3_766 . . . ?
C8S C2S C3S C7S -15(13) . . . . ?
C10S C2S C3S C7S -83(8) . . . . ?
C8S C2S C3S C7S -75(8) 3_766 . . . ?
C16S C2S C3S C7S -68(10) . . . . ?
C15S C2S C3S C7S -141(9) . . . . ?
C13S C2S C3S C10S 97(12) . . . . ?
C4S C2S C3S C10S 176(10) . . . . ?
C9S C2S C3S C10S -10(22) . . . . ?
C14S C2S C3S C10S 101(7) . . . . ?
C16S C2S C3S C10S 52(7) 3_766 . . . ?
C8S C2S C3S C10S 68(11) . . . . ?
C8S C2S C3S C10S 8(6) 3_766 . . . ?
C16S C2S C3S C10S 15(9) . . . . ?
C15S C2S C3S C10S -58(11) . . . . ?
C7S C2S C3S C10S 83(8) . . . . ?
C13S C2S C3S C18S 38(16) . . . 3_766 ?
C4S C2S C3S C18S 117(11) . . . 3_766 ?
C9S C2S C3S C18S -70(23) . . . 3_766 ?
C14S C2S C3S C18S 42(10) . . . 3_766 ?
C16S C2S C3S C18S -7(10) 3_766 . . 3_766 ?
C8S C2S C3S C18S 8(14) . . . 3_766 ?
C10S C2S C3S C18S -59(8) . . . 3_766 ?
C8S C2S C3S C18S -51(9) 3_766 . . 3_766 ?
C16S C2S C3S C18S -44(11) . . . 3_766 ?
C15S C2S C3S C18S -117(10) . . . 3_766 ?
C7S C2S C3S C18S 24(7) . . . 3_766 ?
C13S C2S C3S C14S -4(11) . . . . ?
C4S C2S C3S C14S 75(7) . . . . ?
C9S C2S C3S C14S -112(19) . . . . ?
C16S C2S C3S C14S -50(5) 3_766 . . . ?
C8S C2S C3S C14S -34(8) . . . . ?
C10S C2S C3S C14S -101(7) . . . . ?
C8S C2S C3S C14S -93(5) 3_766 . . . ?
C16S C2S C3S C14S -86(6) . . . . ?
C15S C2S C3S C14S -160(11) . . . . ?
C7S C2S C3S C14S -19(9) . . . . ?
C13S C2S C3S C12S 67(13) . . . . ?
C4S C2S C3S C12S 147(9) . . . . ?
C9S C2S C3S C12S -40(22) . . . . ?
C14S C2S C3S C12S 72(7) . . . . ?
C16S C2S C3S C12S 22(7) 3_766 . . . ?
C8S C2S C3S C12S 38(11) . . . . ?
C10S C2S C3S C12S -30(3) . . . . ?
C8S C2S C3S C12S -22(6) 3_766 . . . ?
C16S C2S C3S C12S -15(9) . . . . ?
C15S C2S C3S C12S -88(10) . . . . ?
C7S C2S C3S C12S 53(6) . . . . ?
C13S C2S C3S C16S 46(11) . . . 3_766 ?
C4S C2S C3S C16S 125(9) . . . 3_766 ?
C9S C2S C3S C16S -62(19) . . . 3_766 ?
C14S C2S C3S C16S 50(5) . . . 3_766 ?
C8S C2S C3S C16S 16(10) . . . 3_766 ?
C10S C2S C3S C16S -52(7) . . . 3_766 ?
C8S C2S C3S C16S -44(5) 3_766 . . 3_766 ?
C16S C2S C3S C16S -37(9) . . . 3_766 ?
C15S C2S C3S C16S -110(10) . . . 3_766 ?
C7S C2S C3S C16S 31(9) . . . 3_766 ?
C4S C2S C3S C13S 79(14) . . . . ?
C9S C2S C3S C13S -108(21) . . . . ?
C14S C2S C3S C13S 4(11) . . . . ?
C16S C2S C3S C13S -46(11) 3_766 . . . ?
C8S C2S C3S C13S -30(10) . . . . ?
C10S C2S C3S C13S -97(12) . . . . ?
C8S C2S C3S C13S -89(11) 3_766 . . . ?
C16S C2S C3S C13S -82(10) . . . . ?
C15S C2S C3S C13S -155(17) . . . . ?
C7S C2S C3S C13S -14(15) . . . . ?
C13S C2S C3S C17S 9(13) . . . . ?
C4S C2S C3S C17S 88(7) . . . . ?
C9S C2S C3S C17S -99(20) . . . . ?
C14S C2S C3S C17S 13(6) . . . . ?
C16S C2S C3S C17S -37(6) 3_766 . . . ?
C8S C2S C3S C17S -21(10) . . . . ?
C10S C2S C3S C17S -88(6) . . . . ?
C8S C2S C3S C17S -80(5) 3_766 . . . ?
C16S C2S C3S C17S -74(7) . . . . ?
C15S C2S C3S C17S -147(8) . . . . ?
C7S C2S C3S C17S -6(6) . . . . ?
C13S C2S C3S C8S 89(11) . . . 3_766 ?
C4S C2S C3S C8S 168(7) . . . 3_766 ?
C9S C2S C3S C8S -19(19) . . . 3_766 ?
C14S C2S C3S C8S 93(5) . . . 3_766 ?
C16S C2S C3S C8S 44(5) 3_766 . . 3_766 ?
C8S C2S C3S C8S 59(10) . . . 3_766 ?
C10S C2S C3S C8S -8(6) . . . 3_766 ?
C16S C2S C3S C8S 7(6) . . . 3_766 ?
C15S C2S C3S C8S -66(9) . . . 3_766 ?
C7S C2S C3S C8S 75(8) . . . 3_766 ?
C13S C2S C4S C3S 130(9) . . . . ?
C9S C2S C4S C3S -176(12) . . . . ?
C14S C2S C4S C3S 98(7) . . . . ?
C16S C2S C4S C3S 63(9) 3_766 . . . ?
C8S C2S C4S C3S 113(8) . . . . ?
C10S C2S C4S C3S 2(7) . . . . ?
C8S C2S C4S C3S 16(10) 3_766 . . . ?
C16S C2S C4S C3S 70(23) . . . . ?
C15S C2S C4S C3S -140(8) . . . . ?
C7S C2S C4S C3S 43(5) . . . . ?
C13S C2S C4S C14S 32(8) . . . . ?
C9S C2S C4S C14S 86(13) . . . . ?
C16S C2S C4S C14S -36(8) 3_766 . . . ?
C3S C2S C4S C14S -98(7) . . . . ?
C8S C2S C4S C14S 15(7) . . . . ?
C10S C2S C4S C14S -96(5) . . . . ?
C8S C2S C4S C14S -82(8) 3_766 . . . ?
C16S C2S C4S C14S -28(22) . . . . ?
C15S C2S C4S C14S 121(9) . . . . ?
C7S C2S C4S C14S -56(5) . . . . ?
C9S C2S C4S C13S 54(11) . . . . ?
C14S C2S C4S C13S -32(8) . . . . ?
C16S C2S C4S C13S -68(8) 3_766 . . . ?
C3S C2S C4S C13S -130(9) . . . . ?
C8S C2S C4S C13S -17(6) . . . . ?
C10S C2S C4S C13S -128(8) . . . . ?
C8S C2S C4S C13S -114(10) 3_766 . . . ?
C16S C2S C4S C13S -60(21) . . . . ?
C15S C2S C4S C13S 89(10) . . . . ?
C7S C2S C4S C13S -88(8) . . . . ?
C13S C2S C4S C9S -54(11) . . . . ?
C14S C2S C4S C9S -86(13) . . . . ?
C16S C2S C4S C9S -121(16) 3_766 . . . ?
C3S C2S C4S C9S 176(12) . . . . ?
C8S C2S C4S C9S -71(12) . . . . ?
C10S C2S C4S C9S 178(14) . . . . ?
C8S C2S C4S C9S -167(18) 3_766 . . . ?
C16S C2S C4S C9S -114(28) . . . . ?
C15S C2S C4S C9S 36(9) . . . . ?
C7S C2S C4S C9S -141(12) . . . . ?
C13S C2S C4S C7S 88(8) . . . . ?
C9S C2S C4S C7S 141(12) . . . . ?
C14S C2S C4S C7S 56(5) . . . . ?
C16S C2S C4S C7S 20(8) 3_766 . . . ?
C3S C2S C4S C7S -43(5) . . . . ?
C8S C2S C4S C7S 71(8) . . . . ?
C10S C2S C4S C7S -40(5) . . . . ?
C8S C2S C4S C7S -26(9) 3_766 . . . ?
C16S C2S C4S C7S 28(23) . . . . ?
C15S C2S C4S C7S 177(8) . . . . ?
C13S C2S C4S C16S 68(8) . . . 3_766 ?
C9S C2S C4S C16S 121(16) . . . 3_766 ?
C14S C2S C4S C16S 36(8) . . . 3_766 ?
C3S C2S C4S C16S -63(9) . . . 3_766 ?
C8S C2S C4S C16S 51(8) . . . 3_766 ?
C10S C2S C4S C16S -60(7) . . . 3_766 ?
C8S C2S C4S C16S -46(7) 3_766 . . 3_766 ?
C16S C2S C4S C16S 8(22) . . . 3_766 ?
C15S C2S C4S C16S 157(13) . . . 3_766 ?
C7S C2S C4S C16S -20(9) . . . 3_766 ?
C13S C2S C4S C5S 111(7) . . . . ?
C9S C2S C4S C5S 164(12) . . . . ?
C14S C2S C4S C5S 79(5) . . . . ?
C16S C2S C4S C5S 43(7) 3_766 . . . ?
C3S C2S C4S C5S -20(6) . . . . ?
C8S C2S C4S C5S 93(7) . . . . ?
C10S C2S C4S C5S -17(4) . . . . ?
C8S C2S C4S C5S -3(8) 3_766 . . . ?
C16S C2S C4S C5S 51(23) . . . . ?
C15S C2S C4S C5S -160(7) . . . . ?
C7S C2S C4S C5S 23(4) . . . . ?
C13S C2S C4S C10S 128(8) . . . . ?
C9S C2S C4S C10S -178(14) . . . . ?
C14S C2S C4S C10S 96(5) . . . . ?
C16S C2S C4S C10S 60(7) 3_766 . . . ?
C3S C2S C4S C10S -2(7) . . . . ?
C8S C2S C4S C10S 111(7) . . . . ?
C8S C2S C4S C10S 14(6) 3_766 . . . ?
C16S C2S C4S C10S 68(22) . . . . ?
C15S C2S C4S C10S -143(9) . . . . ?
C7S C2S C4S C10S 40(5) . . . . ?
C13S C2S C4S C8S 17(6) . . . . ?
C9S C2S C4S C8S 71(12) . . . . ?
C14S C2S C4S C8S -15(7) . . . . ?
C16S C2S C4S C8S -51(8) 3_766 . . . ?
C3S C2S C4S C8S -113(8) . . . . ?
C10S C2S C4S C8S -111(7) . . . . ?
C8S C2S C4S C8S -97(9) 3_766 . . . ?
C16S C2S C4S C8S -43(19) . . . . ?
C15S C2S C4S C8S 107(11) . . . . ?
C7S C2S C4S C8S -71(8) . . . . ?
C13S C2S C4S C17S 67(7) . . . . ?
C9S C2S C4S C17S 120(12) . . . . ?
C14S C2S C4S C17S 35(5) . . . . ?
C16S C2S C4S C17S -1(7) 3_766 . . . ?
C3S C2S C4S C17S -64(6) . . . . ?
C8S C2S C4S C17S 49(7) . . . . ?
C10S C2S C4S C17S -61(4) . . . . ?
C8S C2S C4S C17S -47(8) 3_766 . . . ?
C16S C2S C4S C17S 6(23) . . . . ?
C15S C2S C4S C17S 156(7) . . . . ?
C7S C2S C4S C17S -21(4) . . . . ?
C13S C2S C4S C8S 114(10) . . . 3_766 ?
C9S C2S C4S C8S 167(18) . . . 3_766 ?
C14S C2S C4S C8S 82(8) . . . 3_766 ?
C16S C2S C4S C8S 46(7) 3_766 . . 3_766 ?
C3S C2S C4S C8S -16(10) . . . 3_766 ?
C8S C2S C4S C8S 97(9) . . . 3_766 ?
C10S C2S C4S C8S -14(6) . . . 3_766 ?
C16S C2S C4S C8S 54(20) . . . 3_766 ?
C15S C2S C4S C8S -157(14) . . . 3_766 ?
C7S C2S C4S C8S 26(9) . . . 3_766 ?
C5S C3S C4S C2S -87(20) . . . . ?
C7S C3S C4S C2S -92(10) . . . . ?
C10S C3S C4S C2S -4(12) . . . . ?
C18S C3S C4S C2S -83(13) 3_766 . . . ?
C14S C3S C4S C2S -67(6) . . . . ?
C12S C3S C4S C2S -43(13) . . . . ?
C16S C3S C4S C2S -40(6) 3_766 . . . ?
C13S C3S C4S C2S -31(6) . . . . ?
C17S C3S C4S C2S -92(7) . . . . ?
C8S C3S C4S C2S -10(6) 3_766 . . . ?
C5S C3S C4S C14S -20(21) . . . . ?
C7S C3S C4S C14S -24(11) . . . . ?
C10S C3S C4S C14S 63(12) . . . . ?
C2S C3S C4S C14S 67(6) . . . . ?
C18S C3S C4S C14S -16(14) 3_766 . . . ?
C12S C3S C4S C14S 25(13) . . . . ?
C16S C3S C4S C14S 27(6) 3_766 . . . ?
C13S C3S C4S C14S 37(5) . . . . ?
C17S C3S C4S C14S -25(7) . . . . ?
C8S C3S C4S C14S 57(6) 3_766 . . . ?
C5S C3S C4S C13S -56(22) . . . . ?
C7S C3S C4S C13S -61(12) . . . . ?
C10S C3S C4S C13S 26(14) . . . . ?
C2S C3S C4S C13S 31(6) . . . . ?
C18S C3S C4S C13S -52(15) 3_766 . . . ?
C14S C3S C4S C13S -37(5) . . . . ?
C12S C3S C4S C13S -12(15) . . . . ?
C16S C3S C4S C13S -10(7) 3_766 . . . ?
C17S C3S C4S C13S -61(8) . . . . ?
C8S C3S C4S C13S 21(8) 3_766 . . . ?
C5S C3S C4S C9S -88(20) . . . . ?
C7S C3S C4S C9S -93(10) . . . . ?
C10S C3S C4S C9S -6(13) . . . . ?
C2S C3S C4S C9S -1(4) . . . . ?
C18S C3S C4S C9S -84(13) 3_766 . . . ?
C14S C3S C4S C9S -69(5) . . . . ?
C12S C3S C4S C9S -44(14) . . . . ?
C16S C3S C4S C9S -42(6) 3_766 . . . ?
C13S C3S C4S C9S -32(4) . . . . ?
C17S C3S C4S C9S -93(6) . . . . ?
C8S C3S C4S C9S -11(6) 3_766 . . . ?
C5S C3S C4S C7S 5(14) . . . . ?
C10S C3S C4S C7S 87(11) . . . . ?
C2S C3S C4S C7S 92(10) . . . . ?
C18S C3S C4S C7S 9(8) 3_766 . . . ?
C14S C3S C4S C7S 24(11) . . . . ?
C12S C3S C4S C7S 49(8) . . . . ?
C16S C3S C4S C7S 51(8) 3_766 . . . ?
C13S C3S C4S C7S 61(12) . . . . ?
C17S C3S C4S C7S 0(7) . . . . ?
C8S C3S C4S C7S 82(8) 3_766 . . . ?
C5S C3S C4S C16S -47(18) . . . 3_766 ?
C7S C3S C4S C16S -51(8) . . . 3_766 ?
C10S C3S C4S C16S 36(10) . . . 3_766 ?
C2S C3S C4S C16S 40(6) . . . 3_766 ?
C18S C3S C4S C16S -43(11) 3_766 . . 3_766 ?
C14S C3S C4S C16S -27(6) . . . 3_766 ?
C12S C3S C4S C16S -2(10) . . . 3_766 ?
C13S C3S C4S C16S 10(7) . . . 3_766 ?
C17S C3S C4S C16S -52(5) . . . 3_766 ?
C8S C3S C4S C16S 30(4) 3_766 . . 3_766 ?
C7S C3S C4S C5S -5(14) . . . . ?
C10S C3S C4S C5S 83(17) . . . . ?
C2S C3S C4S C5S 87(20) . . . . ?
C18S C3S C4S C5S 4(11) 3_766 . . . ?
C14S C3S C4S C5S 20(21) . . . . ?
C12S C3S C4S C5S 44(11) . . . . ?
C16S C3S C4S C5S 47(18) 3_766 . . . ?
C13S C3S C4S C5S 56(22) . . . . ?
C17S C3S C4S C5S -5(16) . . . . ?
C8S C3S C4S C5S 77(18) 3_766 . . . ?
C5S C3S C4S C10S -83(17) . . . . ?
C7S C3S C4S C10S -87(11) . . . . ?
C2S C3S C4S C10S 4(12) . . . . ?
C18S C3S C4S C10S -79(12) 3_766 . . . ?
C14S C3S C4S C10S -63(12) . . . . ?
C12S C3S C4S C10S -38(7) . . . . ?
C16S C3S C4S C10S -36(10) 3_766 . . . ?
C13S C3S C4S C10S -26(14) . . . . ?
C17S C3S C4S C10S -88(10) . . . . ?
C8S C3S C4S C10S -6(8) 3_766 . . . ?
C5S C3S C4S C8S -50(21) . . . . ?
C7S C3S C4S C8S -55(12) . . . . ?
C10S C3S C4S C8S 33(12) . . . . ?
C2S C3S C4S C8S 37(6) . . . . ?
C18S C3S C4S C8S -46(15) 3_766 . . . ?
C14S C3S C4S C8S -30(5) . . . . ?
C12S C3S C4S C8S -6(14) . . . . ?
C16S C3S C4S C8S -3(7) 3_766 . . . ?
C13S C3S C4S C8S 6(5) . . . . ?
C17S C3S C4S C8S -55(7) . . . . ?
C8S C3S C4S C8S 27(8) 3_766 . . . ?
C5S C3S C4S C17S 5(16) . . . . ?
C7S C3S C4S C17S 0(7) . . . . ?
C10S C3S C4S C17S 88(10) . . . . ?
C2S C3S C4S C17S 92(7) . . . . ?
C18S C3S C4S C17S 9(10) 3_766 . . . ?
C14S C3S C4S C17S 25(7) . . . . ?
C12S C3S C4S C17S 49(9) . . . . ?
C16S C3S C4S C17S 52(5) 3_766 . . . ?
C13S C3S C4S C17S 61(8) . . . . ?
C8S C3S C4S C17S 82(5) 3_766 . . . ?
C5S C3S C4S C8S -77(18) . . . 3_766 ?
C7S C3S C4S C8S -82(8) . . . 3_766 ?
C10S C3S C4S C8S 6(8) . . . 3_766 ?
C2S C3S C4S C8S 10(6) . . . 3_766 ?
C18S C3S C4S C8S -73(11) 3_766 . . 3_766 ?
C14S C3S C4S C8S -57(6) . . . 3_766 ?
C12S C3S C4S C8S -33(10) . . . 3_766 ?
C16S C3S C4S C8S -30(4) 3_766 . . 3_766 ?
C13S C3S C4S C8S -21(8) . . . 3_766 ?
C17S C3S C4S C8S -82(5) . . . 3_766 ?
C4S C3S C5S C7S -7(21) . . . . ?
C10S C3S C5S C7S -117(12) . . . . ?
C2S C3S C5S C7S -51(15) . . . . ?
C18S C3S C5S C7S -24(31) 3_766 . . . ?
C14S C3S C5S C7S -21(11) . . . . ?
C12S C3S C5S C7S -95(14) . . . . ?
C16S C3S C5S C7S -52(10) 3_766 . . . ?
C13S C3S C5S C7S -38(12) . . . . ?
C17S C3S C5S C7S -1(10) . . . . ?
C8S C3S C5S C7S -88(10) 3_766 . . . ?
C4S C3S C5S C18S 17(44) . . . 3_766 ?
C7S C3S C5S C18S 24(31) . . . 3_766 ?
C10S C3S C5S C18S -93(33) . . . 3_766 ?
C2S C3S C5S C18S -27(39) . . . 3_766 ?
C14S C3S C5S C18S 3(35) . . . 3_766 ?
C12S C3S C5S C18S -71(32) . . . 3_766 ?
C16S C3S C5S C18S -28(33) 3_766 . . 3_766 ?
C13S C3S C5S C18S -14(37) . . . 3_766 ?
C17S C3S C5S C18S 23(31) . . . 3_766 ?
C8S C3S C5S C18S -65(33) 3_766 . . 3_766 ?
C4S C3S C5S C12S 87(21) . . . . ?
C7S C3S C5S C12S 95(14) . . . . ?
C10S C3S C5S C12S -22(8) . . . . ?
C2S C3S C5S C12S 44(16) . . . . ?
C18S C3S C5S C12S 71(32) 3_766 . . . ?
C14S C3S C5S C12S 74(10) . . . . ?
C16S C3S C5S C12S 43(9) 3_766 . . . ?
C13S C3S C5S C12S 57(12) . . . . ?
C17S C3S C5S C12S 94(10) . . . . ?
C8S C3S C5S C12S 6(8) 3_766 . . . ?
C4S C3S C5S C10S 110(20) . . . . ?
C7S C3S C5S C10S 117(12) . . . . ?
C2S C3S C5S C10S 66(13) . . . . ?
C18S C3S C5S C10S 93(33) 3_766 . . . ?
C14S C3S C5S C10S 96(8) . . . . ?
C12S C3S C5S C10S 22(8) . . . . ?
C16S C3S C5S C10S 65(7) 3_766 . . . ?
C13S C3S C5S C10S 79(10) . . . . ?
C17S C3S C5S C10S 116(8) . . . . ?
C8S C3S C5S C10S 29(6) 3_766 . . . ?
C4S C3S C5S C1S 49(28) . . . . ?
C7S C3S C5S C1S 56(16) . . . . ?
C10S C3S C5S C1S -61(13) . . . . ?
C2S C3S C5S C1S 5(23) . . . . ?
C18S C3S C5S C1S 32(26) 3_766 . . . ?
C14S C3S C5S C1S 35(16) . . . . ?
C12S C3S C5S C1S -39(10) . . . . ?
C16S C3S C5S C1S 4(15) 3_766 . . . ?
C13S C3S C5S C1S 18(19) . . . . ?
C17S C3S C5S C1S 55(13) . . . . ?
C8S C3S C5S C1S -32(13) 3_766 . . . ?
C4S C3S C5S C17S -6(21) . . . . ?
C7S C3S C5S C17S 1(10) . . . . ?
C10S C3S C5S C17S -116(8) . . . . ?
C2S C3S C5S C17S -50(13) . . . . ?
C18S C3S C5S C17S -23(31) 3_766 . . . ?
C14S C3S C5S C17S -20(8) . . . . ?
C12S C3S C5S C17S -94(10) . . . . ?
C16S C3S C5S C17S -51(7) 3_766 . . . ?
C13S C3S C5S C17S -37(10) . . . . ?
C8S C3S C5S C17S -88(6) 3_766 . . . ?
C4S C3S C5S C11S -1(28) . . . 3_766 ?
C7S C3S C5S C11S 6(13) . . . 3_766 ?
C10S C3S C5S C11S -111(12) . . . 3_766 ?
C2S C3S C5S C11S -45(20) . . . 3_766 ?
C18S C3S C5S C11S -18(28) 3_766 . . 3_766 ?
C14S C3S C5S C11S -15(14) . . . 3_766 ?
C12S C3S C5S C11S -89(13) . . . 3_766 ?
C16S C3S C5S C11S -46(12) 3_766 . . 3_766 ?
C13S C3S C5S C11S -32(17) . . . 3_766 ?
C17S C3S C5S C11S 5(9) . . . 3_766 ?
C8S C3S C5S C11S -82(11) 3_766 . . 3_766 ?
C7S C3S C5S C4S 7(21) . . . . ?
C10S C3S C5S C4S -110(20) . . . . ?
C2S C3S C5S C4S -43(11) . . . . ?
C18S C3S C5S C4S -17(44) 3_766 . . . ?
C14S C3S C5S C4S -14(14) . . . . ?
C12S C3S C5S C4S -87(21) . . . . ?
C16S C3S C5S C4S -44(17) 3_766 . . . ?
C13S C3S C5S C4S -31(13) . . . . ?
C17S C3S C5S C4S 6(21) . . . . ?
C8S C3S C5S C4S -81(19) 3_766 . . . ?
C4S C3S C5S C6S 67(22) . . . 3_766 ?
C7S C3S C5S C6S 74(12) . . . 3_766 ?
C10S C3S C5S C6S -43(8) . . . 3_766 ?
C2S C3S C5S C6S 23(16) . . . 3_766 ?
C18S C3S C5S C6S 50(30) 3_766 . . 3_766 ?
C14S C3S C5S C6S 53(10) . . . 3_766 ?
C12S C3S C5S C6S -21(6) . . . 3_766 ?
C16S C3S C5S C6S 22(8) 3_766 . . 3_766 ?
C13S C3S C5S C6S 36(13) . . . 3_766 ?
C17S C3S C5S C6S 73(8) . . . 3_766 ?
C8S C3S C5S C6S -14(7) 3_766 . . 3_766 ?
C4S C3S C5S C16S 44(17) . . . 3_766 ?
C7S C3S C5S C16S 52(10) . . . 3_766 ?
C10S C3S C5S C16S -65(7) . . . 3_766 ?
C2S C3S C5S C16S 1(10) . . . 3_766 ?
C18S C3S C5S C16S 28(33) 3_766 . . 3_766 ?
C14S C3S C5S C16S 31(5) . . . 3_766 ?
C12S C3S C5S C16S -43(9) . . . 3_766 ?
C13S C3S C5S C16S 14(7) . . . 3_766 ?
C17S C3S C5S C16S 51(7) . . . 3_766 ?
C8S C3S C5S C16S -37(4) 3_766 . . 3_766 ?
C4S C3S C5S C2S 43(11) . . . . ?
C7S C3S C5S C2S 51(15) . . . . ?
C10S C3S C5S C2S -66(13) . . . . ?
C18S C3S C5S C2S 27(39) 3_766 . . . ?
C14S C3S C5S C2S 30(8) . . . . ?
C12S C3S C5S C2S -44(16) . . . . ?
C16S C3S C5S C2S -1(10) 3_766 . . . ?
C13S C3S C5S C2S 13(5) . . . . ?
C17S C3S C5S C2S 50(13) . . . . ?
C8S C3S C5S C2S -38(11) 3_766 . . . ?
C18S C1S C5S C7S -79(31) 3_766 . . . ?
C6S C1S C5S C7S 100(13) 3_766 . . . ?
C12S C1S C5S C7S 118(16) . . . . ?
C11S C1S C5S C7S -42(11) 3_766 . . . ?
C15S C1S C5S C7S 55(13) 3_766 . . . ?
C17S C1S C5S C7S -12(10) . . . . ?
C10S C1S C5S C7S 116(12) . . . . ?
C9S C1S C5S C7S 75(10) 3_766 . . . ?
C16S C1S C5S C7S 55(10) 3_766 . . . ?
C3S C1S C5S C7S 59(17) . . . . ?
C6S C1S C5S C18S 179(33) 3_766 . . 3_766 ?
C12S C1S C5S C18S -164(33) . . . 3_766 ?
C11S C1S C5S C18S 37(30) 3_766 . . 3_766 ?
C15S C1S C5S C18S 134(32) 3_766 . . 3_766 ?
C7S C1S C5S C18S 79(31) . . . 3_766 ?
C17S C1S C5S C18S 67(29) . . . 3_766 ?
C10S C1S C5S C18S -165(32) . . . 3_766 ?
C9S C1S C5S C18S 153(31) 3_766 . . 3_766 ?
C16S C1S C5S C18S 134(31) 3_766 . . 3_766 ?
C3S C1S C5S C18S 138(37) . . . 3_766 ?
C18S C1S C5S C3S -138(37) 3_766 . . . ?
C6S C1S C5S C3S 41(18) 3_766 . . . ?
C12S C1S C5S C3S 58(18) . . . . ?
C11S C1S C5S C3S -101(15) 3_766 . . . ?
C15S C1S C5S C3S -4(19) 3_766 . . . ?
C7S C1S C5S C3S -59(17) . . . . ?
C17S C1S C5S C3S -71(16) . . . . ?
C10S C1S C5S C3S 57(13) . . . . ?
C9S C1S C5S C3S 15(16) 3_766 . . . ?
C16S C1S C5S C3S -4(14) 3_766 . . . ?
C18S C1S C5S C12S 164(33) 3_766 . . . ?
C6S C1S C5S C12S -18(13) 3_766 . . . ?
C11S C1S C5S C12S -160(14) 3_766 . . . ?
C15S C1S C5S C12S -63(14) 3_766 . . . ?
C7S C1S C5S C12S -118(16) . . . . ?
C17S C1S C5S C12S -129(13) . . . . ?
C10S C1S C5S C12S -2(12) . . . . ?
C9S C1S C5S C12S -43(11) 3_766 . . . ?
C16S C1S C5S C12S -63(12) 3_766 . . . ?
C3S C1S C5S C12S -58(18) . . . . ?
C18S C1S C5S C10S 165(32) 3_766 . . . ?
C6S C1S C5S C10S -16(11) 3_766 . . . ?
C12S C1S C5S C10S 2(12) . . . . ?
C11S C1S C5S C10S -158(9) 3_766 . . . ?
C15S C1S C5S C10S -61(12) 3_766 . . . ?
C7S C1S C5S C10S -116(12) . . . . ?
C17S C1S C5S C10S -127(8) . . . . ?
C9S C1S C5S C10S -41(7) 3_766 . . . ?
C16S C1S C5S C10S -61(7) 3_766 . . . ?
C3S C1S C5S C10S -57(13) . . . . ?
C18S C1S C5S C17S -67(29) 3_766 . . . ?
C6S C1S C5S C17S 112(10) 3_766 . . . ?
C12S C1S C5S C17S 129(13) . . . . ?
C11S C1S C5S C17S -31(6) 3_766 . . . ?
C15S C1S C5S C17S 66(10) 3_766 . . . ?
C7S C1S C5S C17S 12(10) . . . . ?
C10S C1S C5S C17S 127(8) . . . . ?
C9S C1S C5S C17S 86(6) 3_766 . . . ?
C16S C1S C5S C17S 67(6) 3_766 . . . ?
C3S C1S C5S C17S 71(16) . . . . ?
C18S C1S C5S C11S -37(30) 3_766 . . 3_766 ?
C6S C1S C5S C11S 142(12) 3_766 . . 3_766 ?
C12S C1S C5S C11S 160(14) . . . 3_766 ?
C15S C1S C5S C11S 97(11) 3_766 . . 3_766 ?
C7S C1S C5S C11S 42(11) . . . 3_766 ?
C17S C1S C5S C11S 31(6) . . . 3_766 ?
C10S C1S C5S C11S 158(9) . . . 3_766 ?
C9S C1S C5S C11S 117(7) 3_766 . . 3_766 ?
C16S C1S C5S C11S 97(7) 3_766 . . 3_766 ?
C3S C1S C5S C11S 101(16) . . . 3_766 ?
C18S C1S C5S C4S -118(32) 3_766 . . . ?
C6S C1S C5S C4S 61(10) 3_766 . . . ?
C12S C1S C5S C4S 78(12) . . . . ?
C11S C1S C5S C4S -81(7) 3_766 . . . ?
C15S C1S C5S C4S 16(11) 3_766 . . . ?
C7S C1S C5S C4S -39(9) . . . . ?
C17S C1S C5S C4S -51(6) . . . . ?
C10S C1S C5S C4S 77(6) . . . . ?
C9S C1S C5S C4S 35(6) 3_766 . . . ?
C16S C1S C5S C4S 16(5) 3_766 . . . ?
C3S C1S C5S C4S 20(12) . . . . ?
C18S C1S C5S C6S -179(32) 3_766 . . 3_766 ?
C12S C1S C5S C6S 18(13) . . . 3_766 ?
C11S C1S C5S C6S -142(12) 3_766 . . 3_766 ?
C15S C1S C5S C6S -45(9) 3_766 . . 3_766 ?
C7S C1S C5S C6S -100(13) . . . 3_766 ?
C17S C1S C5S C6S -112(10) . . . 3_766 ?
C10S C1S C5S C6S 16(11) . . . 3_766 ?
C9S C1S C5S C6S -26(7) 3_766 . . 3_766 ?
C16S C1S C5S C6S -45(9) 3_766 . . 3_766 ?
C3S C1S C5S C6S -41(18) . . . 3_766 ?
C18S C1S C5S C16S -134(31) 3_766 . . 3_766 ?
C6S C1S C5S C16S 45(9) 3_766 . . 3_766 ?
C12S C1S C5S C16S 63(12) . . . 3_766 ?
C11S C1S C5S C16S -97(7) 3_766 . . 3_766 ?
C15S C1S C5S C16S 0(9) 3_766 . . 3_766 ?
C7S C1S C5S C16S -55(10) . . . 3_766 ?
C17S C1S C5S C16S -67(6) . . . 3_766 ?
C10S C1S C5S C16S 61(7) . . . 3_766 ?
C9S C1S C5S C16S 19(4) 3_766 . . 3_766 ?
C3S C1S C5S C16S 4(15) . . . 3_766 ?
C18S C1S C5S C2S -135(32) 3_766 . . . ?
C6S C1S C5S C2S 44(10) 3_766 . . . ?
C12S C1S C5S C2S 61(12) . . . . ?
C11S C1S C5S C2S -99(7) 3_766 . . . ?
C15S C1S C5S C2S -2(11) 3_766 . . . ?
C7S C1S C5S C2S -56(10) . . . . ?
C17S C1S C5S C2S -68(6) . . . . ?
C10S C1S C5S C2S 59(6) . . . . ?
C9S C1S C5S C2S 18(5) 3_766 . . . ?
C16S C1S C5S C2S -1(5) 3_766 . . . ?
C3S C1S C5S C2S 3(13) . . . . ?
C2S C4S C5S C7S -94(12) . . . . ?
C3S C4S C5S C7S 172(23) . . . . ?
C14S C4S C5S C7S -28(11) . . . . ?
C13S C4S C5S C7S -58(12) . . . . ?
C9S C4S C5S C7S -89(11) . . . . ?
C16S C4S C5S C7S -61(11) 3_766 . . . ?
C10S C4S C5S C7S -123(13) . . . . ?
C8S C4S C5S C7S -55(12) . . . . ?
C17S C4S C5S C7S -2(11) . . . . ?
C8S C4S C5S C7S -96(11) 3_766 . . . ?
C2S C4S C5S C18S -76(16) . . . 3_766 ?
C3S C4S C5S C18S -170(26) . . . 3_766 ?
C14S C4S C5S C18S -10(16) . . . 3_766 ?
C13S C4S C5S C18S -41(17) . . . 3_766 ?
C9S C4S C5S C18S -71(16) . . . 3_766 ?
C7S C4S C5S C18S 18(15) . . . 3_766 ?
C16S C4S C5S C18S -43(16) 3_766 . . 3_766 ?
C10S C4S C5S C18S -105(17) . . . 3_766 ?
C8S C4S C5S C18S -37(16) . . . 3_766 ?
C17S C4S C5S C18S 16(16) . . . 3_766 ?
C8S C4S C5S C18S -78(16) 3_766 . . 3_766 ?
C2S C4S C5S C3S 94(20) . . . . ?
C14S C4S C5S C3S 160(21) . . . . ?
C13S C4S C5S C3S 130(21) . . . . ?
C9S C4S C5S C3S 99(20) . . . . ?
C7S C4S C5S C3S -172(23) . . . . ?
C16S C4S C5S C3S 127(21) 3_766 . . . ?
C10S C4S C5S C3S 65(21) . . . . ?
C8S C4S C5S C3S 133(21) . . . . ?
C17S C4S C5S C3S -174(21) . . . . ?
C8S C4S C5S C3S 92(20) 3_766 . . . ?
C2S C4S C5S C12S -6(8) . . . . ?
C3S C4S C5S C12S -100(21) . . . . ?
C14S C4S C5S C12S 60(7) . . . . ?
C13S C4S C5S C12S 30(8) . . . . ?
C9S C4S C5S C12S -1(8) . . . . ?
C7S C4S C5S C12S 88(13) . . . . ?
C16S C4S C5S C12S 27(7) 3_766 . . . ?
C10S C4S C5S C12S -35(5) . . . . ?
C8S C4S C5S C12S 33(8) . . . . ?
C17S C4S C5S C12S 86(8) . . . . ?
C8S C4S C5S C12S -8(6) 3_766 . . . ?
C2S C4S C5S C10S 29(8) . . . . ?
C3S C4S C5S C10S -65(21) . . . . ?
C14S C4S C5S C10S 95(7) . . . . ?
C13S C4S C5S C10S 64(7) . . . . ?
C9S C4S C5S C10S 34(7) . . . . ?
C7S C4S C5S C10S 123(13) . . . . ?
C16S C4S C5S C10S 62(7) 3_766 . . . ?
C8S C4S C5S C10S 67(7) . . . . ?
C17S C4S C5S C10S 121(8) . . . . ?
C8S C4S C5S C10S 27(6) 3_766 . . . ?
C2S C4S C5S C1S -51(7) . . . . ?
C3S C4S C5S C1S -145(21) . . . . ?
C14S C4S C5S C1S 15(6) . . . . ?
C13S C4S C5S C1S -16(7) . . . . ?
C9S C4S C5S C1S -46(7) . . . . ?
C7S C4S C5S C1S 43(11) . . . . ?
C16S C4S C5S C1S -18(6) 3_766 . . . ?
C10S C4S C5S C1S -80(7) . . . . ?
C8S C4S C5S C1S -13(7) . . . . ?
C17S C4S C5S C1S 41(6) . . . . ?
C8S C4S C5S C1S -53(5) 3_766 . . . ?
C2S C4S C5S C17S -92(6) . . . . ?
C3S C4S C5S C17S 174(21) . . . . ?
C14S C4S C5S C17S -26(5) . . . . ?
C13S C4S C5S C17S -57(6) . . . . ?
C9S C4S C5S C17S -87(5) . . . . ?
C7S C4S C5S C17S 2(11) . . . . ?
C16S C4S C5S C17S -59(6) 3_766 . . . ?
C10S C4S C5S C17S -121(8) . . . . ?
C8S C4S C5S C17S -54(6) . . . . ?
C8S C4S C5S C17S -94(5) 3_766 . . . ?
C2S C4S C5S C11S -87(7) . . . 3_766 ?
C3S C4S C5S C11S 179(21) . . . 3_766 ?
C14S C4S C5S C11S -21(6) . . . 3_766 ?
C13S C4S C5S C11S -51(6) . . . 3_766 ?
C9S C4S C5S C11S -82(6) . . . 3_766 ?
C7S C4S C5S C11S 7(10) . . . 3_766 ?
C16S C4S C5S C11S -54(6) 3_766 . . 3_766 ?
C10S C4S C5S C11S -116(8) . . . 3_766 ?
C8S C4S C5S C11S -48(6) . . . 3_766 ?
C17S C4S C5S C11S 5(5) . . . 3_766 ?
C8S C4S C5S C11S -89(5) 3_766 . . 3_766 ?
C2S C4S C5S C6S -29(6) . . . 3_766 ?
C3S C4S C5S C6S -123(21) . . . 3_766 ?
C14S C4S C5S C6S 37(5) . . . 3_766 ?
C13S C4S C5S C6S 7(6) . . . 3_766 ?
C9S C4S C5S C6S -24(5) . . . 3_766 ?
C7S C4S C5S C6S 65(11) . . . 3_766 ?
C16S C4S C5S C6S 4(5) 3_766 . . 3_766 ?
C10S C4S C5S C6S -58(6) . . . 3_766 ?
C8S C4S C5S C6S 10(5) . . . 3_766 ?
C17S C4S C5S C6S 63(5) . . . 3_766 ?
C8S C4S C5S C6S -31(3) 3_766 . . 3_766 ?
C2S C4S C5S C16S -33(6) . . . 3_766 ?
C3S C4S C5S C16S -127(21) . . . 3_766 ?
C14S C4S C5S C16S 33(5) . . . 3_766 ?
C13S C4S C5S C16S 3(6) . . . 3_766 ?
C9S C4S C5S C16S -28(5) . . . 3_766 ?
C7S C4S C5S C16S 61(11) . . . 3_766 ?
C10S C4S C5S C16S -62(7) . . . 3_766 ?
C8S C4S C5S C16S 6(6) . . . 3_766 ?
C17S C4S C5S C16S 59(6) . . . 3_766 ?
C8S C4S C5S C16S -35(4) 3_766 . . 3_766 ?
C3S C4S C5S C2S -94(20) . . . . ?
C14S C4S C5S C2S 66(5) . . . . ?
C13S C4S C5S C2S 35(5) . . . . ?
C9S C4S C5S C2S 5(4) . . . . ?
C7S C4S C5S C2S 94(12) . . . . ?
C16S C4S C5S C2S 33(6) 3_766 . . . ?
C10S C4S C5S C2S -29(8) . . . . ?
C8S C4S C5S C2S 39(6) . . . . ?
C17S C4S C5S C2S 92(6) . . . . ?
C8S C4S C5S C2S -2(5) 3_766 . . . ?
C13S C2S C5S C7S -22(14) . . . . ?
C4S C2S C5S C7S 76(12) . . . . ?
C9S C2S C5S C7S -88(15) . . . . ?
C14S C2S C5S C7S -6(11) . . . . ?
C16S C2S C5S C7S -59(12) 3_766 . . . ?
C3S C2S C5S C7S 123(17) . . . . ?
C8S C2S C5S C7S -45(13) . . . . ?
C10S C2S C5S C7S -136(14) . . . . ?
C8S C2S C5S C7S -106(11) 3_766 . . . ?
C16S C2S C5S C7S -90(12) . . . . ?
C15S C2S C5S C7S -131(11) . . . . ?
C13S C2S C5S C18S 21(19) . . . 3_766 ?
C4S C2S C5S C18S 119(17) . . . 3_766 ?
C9S C2S C5S C18S -45(20) . . . 3_766 ?
C14S C2S C5S C18S 37(16) . . . 3_766 ?
C16S C2S C5S C18S -16(16) 3_766 . . 3_766 ?
C3S C2S C5S C18S 166(22) . . . 3_766 ?
C8S C2S C5S C18S -2(17) . . . 3_766 ?
C10S C2S C5S C18S -93(17) . . . 3_766 ?
C8S C2S C5S C18S -63(16) 3_766 . . 3_766 ?
C16S C2S C5S C18S -47(17) . . . 3_766 ?
C15S C2S C5S C18S -87(17) . . . 3_766 ?
C7S C2S C5S C18S 43(16) . . . 3_766 ?
C13S C2S C5S C3S -145(16) . . . . ?
C4S C2S C5S C3S -47(13) . . . . ?
C9S C2S C5S C3S 149(17) . . . . ?
C14S C2S C5S C3S -129(14) . . . . ?
C16S C2S C5S C3S 178(15) 3_766 . . . ?
C8S C2S C5S C3S -168(15) . . . . ?
C10S C2S C5S C3S 101(15) . . . . ?
C8S C2S C5S C3S 131(14) 3_766 . . . ?
C16S C2S C5S C3S 147(14) . . . . ?
C15S C2S C5S C3S 107(14) . . . . ?
C7S C2S C5S C3S -123(17) . . . . ?
C13S C2S C5S C12S 76(10) . . . . ?
C4S C2S C5S C12S 174(8) . . . . ?
C9S C2S C5S C12S 10(13) . . . . ?
C14S C2S C5S C12S 92(7) . . . . ?
C16S C2S C5S C12S 39(8) 3_766 . . . ?
C3S C2S C5S C12S -139(16) . . . . ?
C8S C2S C5S C12S 53(8) . . . . ?
C10S C2S C5S C12S -38(6) . . . . ?
C8S C2S C5S C12S -8(6) 3_766 . . . ?
C16S C2S C5S C12S 8(7) . . . . ?
C15S C2S C5S C12S -32(10) . . . . ?
C7S C2S C5S C12S 98(13) . . . . ?
C13S C2S C5S C10S 114(10) . . . . ?
C4S C2S C5S C10S -148(9) . . . . ?
C9S C2S C5S C10S 48(13) . . . . ?
C14S C2S C5S C10S 130(8) . . . . ?
C16S C2S C5S C10S 77(8) 3_766 . . . ?
C3S C2S C5S C10S -101(15) . . . . ?
C8S C2S C5S C10S 91(9) . . . . ?
C8S C2S C5S C10S 30(7) 3_766 . . . ?
C16S C2S C5S C10S 46(8) . . . . ?
C15S C2S C5S C10S 6(10) . . . . ?
C7S C2S C5S C10S 136(14) . . . . ?
C13S C2S C5S C1S 38(10) . . . . ?
C4S C2S C5S C1S 137(7) . . . . ?
C9S C2S C5S C1S -27(12) . . . . ?
C14S C2S C5S C1S 54(6) . . . . ?
C16S C2S C5S C1S 2(7) 3_766 . . . ?
C3S C2S C5S C1S -177(15) . . . . ?
C8S C2S C5S C1S 15(8) . . . . ?
C10S C2S C5S C1S -75(7) . . . . ?
C8S C2S C5S C1S -45(5) 3_766 . . . ?
C16S C2S C5S C1S -30(6) . . . . ?
C15S C2S C5S C1S -70(8) . . . . ?
C7S C2S C5S C1S 61(11) . . . . ?
C13S C2S C5S C17S -13(9) . . . . ?
C4S C2S C5S C17S 85(7) . . . . ?
C9S C2S C5S C17S -79(11) . . . . ?
C14S C2S C5S C17S 3(6) . . . . ?
C16S C2S C5S C17S -50(7) 3_766 . . . ?
C3S C2S C5S C17S 132(14) . . . . ?
C8S C2S C5S C17S -36(7) . . . . ?
C10S C2S C5S C17S -127(8) . . . . ?
C8S C2S C5S C17S -97(5) 3_766 . . . ?
C16S C2S C5S C17S -81(6) . . . . ?
C15S C2S C5S C17S -121(7) . . . . ?
C7S C2S C5S C17S 9(11) . . . . ?
C13S C2S C5S C11S 3(10) . . . 3_766 ?
C4S C2S C5S C11S 102(7) . . . 3_766 ?
C9S C2S C5S C11S -62(12) . . . 3_766 ?
C14S C2S C5S C11S 19(6) . . . 3_766 ?
C16S C2S C5S C11S -33(7) 3_766 . . 3_766 ?
C3S C2S C5S C11S 149(15) . . . 3_766 ?
C8S C2S C5S C11S -19(8) . . . 3_766 ?
C10S C2S C5S C11S -110(8) . . . 3_766 ?
C8S C2S C5S C11S -80(5) 3_766 . . 3_766 ?
C16S C2S C5S C11S -65(6) . . . 3_766 ?
C15S C2S C5S C11S -105(7) . . . 3_766 ?
C7S C2S C5S C11S 26(10) . . . 3_766 ?
C13S C2S C5S C4S -99(11) . . . . ?
C9S C2S C5S C4S -164(13) . . . . ?
C14S C2S C5S C4S -83(7) . . . . ?
C16S C2S C5S C4S -135(8) 3_766 . . . ?
C3S C2S C5S C4S 47(13) . . . . ?
C8S C2S C5S C4S -122(9) . . . . ?
C10S C2S C5S C4S 148(9) . . . . ?
C8S C2S C5S C4S 178(6) 3_766 . . . ?
C16S C2S C5S C4S -167(7) . . . . ?
C15S C2S C5S C4S 153(8) . . . . ?
C7S C2S C5S C4S -76(12) . . . . ?
C13S C2S C5S C6S 55(9) . . . 3_766 ?
C4S C2S C5S C6S 153(6) . . . 3_766 ?
C9S C2S C5S C6S -11(11) . . . 3_766 ?
C14S C2S C5S C6S 70(5) . . . 3_766 ?
C16S C2S C5S C6S 18(6) 3_766 . . 3_766 ?
C3S C2S C5S C6S -160(14) . . . 3_766 ?
C8S C2S C5S C6S 32(7) . . . 3_766 ?
C10S C2S C5S C6S -59(6) . . . 3_766 ?
C8S C2S C5S C6S -29(3) 3_766 . . 3_766 ?
C16S C2S C5S C6S -14(5) . . . 3_766 ?
C15S C2S C5S C6S -54(7) . . . 3_766 ?
C7S C2S C5S C6S 77(11) . . . 3_766 ?
C13S C2S C5S C16S 36(9) . . . 3_766 ?
C4S C2S C5S C16S 135(8) . . . 3_766 ?
C9S C2S C5S C16S -29(11) . . . 3_766 ?
C14S C2S C5S C16S 52(6) . . . 3_766 ?
C3S C2S C5S C16S -178(15) . . . 3_766 ?
C8S C2S C5S C16S 14(9) . . . 3_766 ?
C10S C2S C5S C16S -77(8) . . . 3_766 ?
C8S C2S C5S C16S -47(6) 3_766 . . 3_766 ?
C16S C2S C5S C16S -32(9) . . . 3_766 ?
C15S C2S C5S C16S -72(8) . . . 3_766 ?
C7S C2S C5S C16S 59(12) . . . 3_766 ?
C3S C5S C7S C18S 169(13) . . . 3_766 ?
C12S C5S C7S C18S 60(12) . . . 3_766 ?
C10S C5S C7S C18S 101(14) . . . 3_766 ?
C1S C5S C7S C18S 22(9) . . . 3_766 ?
C17S C5S C7S C18S -9(30) . . . 3_766 ?
C11S C5S C7S C18S -6(12) 3_766 . . 3_766 ?
C4S C5S C7S C18S 166(11) . . . 3_766 ?
C6S C5S C7S C18S 46(9) 3_766 . . 3_766 ?
C16S C5S C7S C18S 100(11) 3_766 . . 3_766 ?
C2S C5S C7S C18S 143(10) . . . 3_766 ?
C18S C5S C7S C17S 9(30) 3_766 . . . ?
C3S C5S C7S C17S 178(28) . . . . ?
C12S C5S C7S C17S 68(31) . . . . ?
C10S C5S C7S C17S 110(27) . . . . ?
C1S C5S C7S C17S 30(27) . . . . ?
C11S C5S C7S C17S 3(22) 3_766 . . . ?
C4S C5S C7S C17S 175(31) . . . . ?
C6S C5S C7S C17S 54(27) 3_766 . . . ?
C16S C5S C7S C17S 109(31) 3_766 . . . ?
C2S C5S C7S C17S 152(31) . . . . ?
C18S C5S C7S C3S -169(13) 3_766 . . . ?
C12S C5S C7S C3S -109(12) . . . . ?
C10S C5S C7S C3S -68(11) . . . . ?
C1S C5S C7S C3S -147(9) . . . . ?
C17S C5S C7S C3S -178(28) . . . . ?
C11S C5S C7S C3S -175(11) 3_766 . . . ?
C4S C5S C7S C3S -3(9) . . . . ?
C6S C5S C7S C3S -123(8) 3_766 . . . ?
C16S C5S C7S C3S -69(10) 3_766 . . . ?
C2S C5S C7S C3S -26(8) . . . . ?
C18S C5S C7S C12S -60(12) 3_766 . . . ?
C3S C5S C7S C12S 109(12) . . . . ?
C10S C5S C7S C12S 41(11) . . . . ?
C1S C5S C7S C12S -38(10) . . . . ?
C17S C5S C7S C12S -68(31) . . . . ?
C11S C5S C7S C12S -65(13) 3_766 . . . ?
C4S C5S C7S C12S 106(10) . . . . ?
C6S C5S C7S C12S -14(10) 3_766 . . . ?
C16S C5S C7S C12S 40(13) 3_766 . . . ?
C2S C5S C7S C12S 84(10) . . . . ?
C18S C5S C7S C1S -22(9) 3_766 . . . ?
C3S C5S C7S C1S 147(9) . . . . ?
C12S C5S C7S C1S 38(10) . . . . ?
C10S C5S C7S C1S 79(10) . . . . ?
C17S C5S C7S C1S -30(27) . . . . ?
C11S C5S C7S C1S -27(6) 3_766 . . . ?
C4S C5S C7S C1S 144(7) . . . . ?
C6S C5S C7S C1S 24(3) 3_766 . . . ?
C16S C5S C7S C1S 78(8) 3_766 . . . ?
C2S C5S C7S C1S 122(6) . . . . ?
C18S C5S C7S C11S 6(12) 3_766 . . 3_766 ?
C3S C5S C7S C11S 175(11) . . . 3_766 ?
C12S C5S C7S C11S 65(13) . . . 3_766 ?
C10S C5S C7S C11S 107(11) . . . 3_766 ?
C1S C5S C7S C11S 27(6) . . . 3_766 ?
C17S C5S C7S C11S -3(22) . . . 3_766 ?
C4S C5S C7S C11S 172(11) . . . 3_766 ?
C6S C5S C7S C11S 51(7) 3_766 . . 3_766 ?
C16S C5S C7S C11S 106(12) 3_766 . . 3_766 ?
C2S C5S C7S C11S 149(11) . . . 3_766 ?
C18S C5S C7S C10S -101(14) 3_766 . . . ?
C3S C5S C7S C10S 68(11) . . . . ?
C12S C5S C7S C10S -41(11) . . . . ?
C1S C5S C7S C10S -79(10) . . . . ?
C17S C5S C7S C10S -110(27) . . . . ?
C11S C5S C7S C10S -107(11) 3_766 . . . ?
C4S C5S C7S C10S 65(12) . . . . ?
C6S C5S C7S C10S -55(10) 3_766 . . . ?
C16S C5S C7S C10S -1(15) 3_766 . . . ?
C2S C5S C7S C10S 42(12) . . . . ?
C18S C5S C7S C16S -100(11) 3_766 . . 3_766 ?
C3S C5S C7S C16S 69(10) . . . 3_766 ?
C12S C5S C7S C16S -40(13) . . . 3_766 ?
C10S C5S C7S C16S 1(15) . . . 3_766 ?
C1S C5S C7S C16S -78(8) . . . 3_766 ?
C17S C5S C7S C16S -109(31) . . . 3_766 ?
C11S C5S C7S C16S -106(12) 3_766 . . 3_766 ?
C4S C5S C7S C16S 66(6) . . . 3_766 ?
C6S C5S C7S C16S -54(7) 3_766 . . 3_766 ?
C2S C5S C7S C16S 43(6) . . . 3_766 ?
C18S C5S C7S C14S -137(16) 3_766 . . . ?
C3S C5S C7S C14S 32(16) . . . . ?
C12S C5S C7S C14S -77(17) . . . . ?
C10S C5S C7S C14S -36(21) . . . . ?
C1S C5S C7S C14S -115(15) . . . . ?
C17S C5S C7S C14S -146(39) . . . . ?
C11S C5S C7S C14S -143(20) 3_766 . . . ?
C4S C5S C7S C14S 29(10) . . . . ?
C6S C5S C7S C14S -91(14) 3_766 . . . ?
C16S C5S C7S C14S -37(10) 3_766 . . . ?
C2S C5S C7S C14S 6(11) . . . . ?
C18S C5S C7S C4S -166(11) 3_766 . . . ?
C3S C5S C7S C4S 3(9) . . . . ?
C12S C5S C7S C4S -106(10) . . . . ?
C10S C5S C7S C4S -65(12) . . . . ?
C1S C5S C7S C4S -144(7) . . . . ?
C17S C5S C7S C4S -175(31) . . . . ?
C11S C5S C7S C4S -172(11) 3_766 . . . ?
C6S C5S C7S C4S -120(5) 3_766 . . . ?
C16S C5S C7S C4S -66(6) 3_766 . . . ?
C2S C5S C7S C4S -22.8(18) . . . . ?
C18S C5S C7S C6S -46(9) 3_766 . . 3_766 ?
C3S C5S C7S C6S 123(8) . . . 3_766 ?
C12S C5S C7S C6S 14(10) . . . 3_766 ?
C10S C5S C7S C6S 55(10) . . . 3_766 ?
C1S C5S C7S C6S -24(3) . . . 3_766 ?
C17S C5S C7S C6S -54(27) . . . 3_766 ?
C11S C5S C7S C6S -51(7) 3_766 . . 3_766 ?
C4S C5S C7S C6S 120(5) . . . 3_766 ?
C16S C5S C7S C6S 54(7) 3_766 . . 3_766 ?
C2S C5S C7S C6S 98(5) . . . 3_766 ?
C4S C3S C7S C5S 175(14) . . . . ?
C10S C3S C7S C5S 52(10) . . . . ?
C2S C3S C7S C5S 142(12) . . . . ?
C18S C3S C7S C5S 10(12) 3_766 . . . ?
C14S C3S C7S C5S 156(12) . . . . ?
C12S C3S C7S C5S 45(9) . . . . ?
C16S C3S C7S C5S 115(12) 3_766 . . . ?
C13S C3S C7S C5S 146(11) . . . . ?
C17S C3S C7S C5S 177(44) . . . . ?
C8S C3S C7S C5S 85(10) 3_766 . . . ?
C5S C3S C7S C18S -10(12) . . . 3_766 ?
C4S C3S C7S C18S 165(12) . . . 3_766 ?
C10S C3S C7S C18S 42(14) . . . 3_766 ?
C2S C3S C7S C18S 131(12) . . . 3_766 ?
C14S C3S C7S C18S 146(14) . . . 3_766 ?
C12S C3S C7S C18S 35(10) . . . 3_766 ?
C16S C3S C7S C18S 104(13) 3_766 . . 3_766 ?
C13S C3S C7S C18S 136(12) . . . 3_766 ?
C17S C3S C7S C18S 166(47) . . . 3_766 ?
C8S C3S C7S C18S 75(12) 3_766 . . 3_766 ?
C5S C3S C7S C17S -177(44) . . . . ?
C4S C3S C7S C17S -2(43) . . . . ?
C10S C3S C7S C17S -125(38) . . . . ?
C2S C3S C7S C17S -35(41) . . . . ?
C18S C3S C7S C17S -166(47) 3_766 . . . ?
C14S C3S C7S C17S -21(37) . . . . ?
C12S C3S C7S C17S -132(41) . . . . ?
C16S C3S C7S C17S -62(38) 3_766 . . . ?
C13S C3S C7S C17S -31(39) . . . . ?
C8S C3S C7S C17S -91(39) 3_766 . . . ?
C5S C3S C7S C12S -45(9) . . . . ?
C4S C3S C7S C12S 130(10) . . . . ?
C10S C3S C7S C12S 7(8) . . . . ?
C2S C3S C7S C12S 97(9) . . . . ?
C18S C3S C7S C12S -35(10) 3_766 . . . ?
C14S C3S C7S C12S 111(8) . . . . ?
C16S C3S C7S C12S 70(7) 3_766 . . . ?
C13S C3S C7S C12S 101(7) . . . . ?
C17S C3S C7S C12S 132(41) . . . . ?
C8S C3S C7S C12S 41(6) 3_766 . . . ?
C5S C3S C7S C1S -39(11) . . . . ?
C4S C3S C7S C1S 136(10) . . . . ?
C10S C3S C7S C1S 13(13) . . . . ?
C2S C3S C7S C1S 103(10) . . . . ?
C18S C3S C7S C1S -29(8) 3_766 . . . ?
C14S C3S C7S C1S 117(12) . . . . ?
C12S C3S C7S C1S 6(9) . . . . ?
C16S C3S C7S C1S 76(11) 3_766 . . . ?
C13S C3S C7S C1S 107(10) . . . . ?
C17S C3S C7S C1S 138(46) . . . . ?
C8S C3S C7S C1S 46(10) 3_766 . . . ?
C5S C3S C7S C11S -14(30) . . . 3_766 ?
C4S C3S C7S C11S 161(29) . . . 3_766 ?
C10S C3S C7S C11S 38(35) . . . 3_766 ?
C2S C3S C7S C11S 127(30) . . . 3_766 ?
C18S C3S C7S C11S -4(26) 3_766 . . 3_766 ?
C14S C3S C7S C11S 142(34) . . . 3_766 ?
C12S C3S C7S C11S 31(31) . . . 3_766 ?
C16S C3S C7S C11S 100(33) 3_766 . . 3_766 ?
C13S C3S C7S C11S 132(32) . . . 3_766 ?
C17S C3S C7S C11S 163(67) . . . 3_766 ?
C8S C3S C7S C11S 71(33) 3_766 . . 3_766 ?
C5S C3S C7S C10S -52(10) . . . . ?
C4S C3S C7S C10S 123(13) . . . . ?
C2S C3S C7S C10S 90(10) . . . . ?
C18S C3S C7S C10S -42(14) 3_766 . . . ?
C14S C3S C7S C10S 104(8) . . . . ?
C12S C3S C7S C10S -7(8) . . . . ?
C16S C3S C7S C10S 63(8) 3_766 . . . ?
C13S C3S C7S C10S 94(8) . . . . ?
C17S C3S C7S C10S 125(38) . . . . ?
C8S C3S C7S C10S 34(7) 3_766 . . . ?
C5S C3S C7S C16S -115(12) . . . 3_766 ?
C4S C3S C7S C16S 61(10) . . . 3_766 ?
C10S C3S C7S C16S -63(8) . . . 3_766 ?
C2S C3S C7S C16S 27(8) . . . 3_766 ?
C18S C3S C7S C16S -104(13) 3_766 . . 3_766 ?
C14S C3S C7S C16S 41(5) . . . 3_766 ?
C12S C3S C7S C16S -70(7) . . . 3_766 ?
C13S C3S C7S C16S 31(6) . . . 3_766 ?
C17S C3S C7S C16S 62(38) . . . 3_766 ?
C8S C3S C7S C16S -29(5) 3_766 . . 3_766 ?
C5S C3S C7S C14S -156(12) . . . . ?
C4S C3S C7S C14S 19(9) . . . . ?
C10S C3S C7S C14S -104(8) . . . . ?
C2S C3S C7S C14S -14(6) . . . . ?
C18S C3S C7S C14S -146(14) 3_766 . . . ?
C12S C3S C7S C14S -111(8) . . . . ?
C16S C3S C7S C14S -41(5) 3_766 . . . ?
C13S C3S C7S C14S -10(4) . . . . ?
C17S C3S C7S C14S 21(37) . . . . ?
C8S C3S C7S C14S -70(4) 3_766 . . . ?
C5S C3S C7S C4S -175(14) . . . . ?
C10S C3S C7S C4S -123(13) . . . . ?
C2S C3S C7S C4S -34(4) . . . . ?
C18S C3S C7S C4S -165(12) 3_766 . . . ?
C14S C3S C7S C4S -19(9) . . . . ?
C12S C3S C7S C4S -130(10) . . . . ?
C16S C3S C7S C4S -61(10) 3_766 . . . ?
C13S C3S C7S C4S -29(7) . . . . ?
C17S C3S C7S C4S 2(43) . . . . ?
C8S C3S C7S C4S -90(9) 3_766 . . . ?
C5S C3S C7S C6S -60(10) . . . 3_766 ?
C4S C3S C7S C6S 115(9) . . . 3_766 ?
C10S C3S C7S C6S -8(10) . . . 3_766 ?
C2S C3S C7S C6S 82(8) . . . 3_766 ?
C18S C3S C7S C6S -50(9) 3_766 . . 3_766 ?
C14S C3S C7S C6S 96(7) . . . 3_766 ?
C12S C3S C7S C6S -15(6) . . . 3_766 ?
C16S C3S C7S C6S 55(7) 3_766 . . 3_766 ?
C13S C3S C7S C6S 86(7) . . . 3_766 ?
C17S C3S C7S C6S 117(42) . . . 3_766 ?
C8S C3S C7S C6S 26(6) 3_766 . . 3_766 ?
C18S C1S C7S C5S 43(22) 3_766 . . . ?
C6S C1S C7S C5S -90(12) 3_766 . . . ?
C12S C1S C7S C5S -40(10) . . . . ?
C11S C1S C7S C5S 134(12) 3_766 . . . ?
C15S C1S C7S C5S -135(11) 3_766 . . . ?
C17S C1S C7S C5S 163(15) . . . . ?
C10S C1S C7S C5S -42(8) . . . . ?
C9S C1S C7S C5S -107(9) 3_766 . . . ?
C16S C1S C7S C5S -108(10) 3_766 . . . ?
C3S C1S C7S C5S -32(9) . . . . ?
C6S C1S C7S C18S -133(23) 3_766 . . 3_766 ?
C12S C1S C7S C18S -83(22) . . . 3_766 ?
C11S C1S C7S C18S 90(20) 3_766 . . 3_766 ?
C15S C1S C7S C18S -178(23) 3_766 . . 3_766 ?
C5S C1S C7S C18S -43(22) . . . 3_766 ?
C17S C1S C7S C18S 120(21) . . . 3_766 ?
C10S C1S C7S C18S -86(22) . . . 3_766 ?
C9S C1S C7S C18S -150(22) 3_766 . . 3_766 ?
C16S C1S C7S C18S -151(23) 3_766 . . 3_766 ?
C3S C1S C7S C18S -75(25) . . . 3_766 ?
C18S C1S C7S C17S -120(21) 3_766 . . . ?
C6S C1S C7S C17S 108(12) 3_766 . . . ?
C12S C1S C7S C17S 157(12) . . . . ?
C11S C1S C7S C17S -29(9) 3_766 . . . ?
C15S C1S C7S C17S 62(11) 3_766 . . . ?
C5S C1S C7S C17S -163(15) . . . . ?
C10S C1S C7S C17S 155(12) . . . . ?
C9S C1S C7S C17S 90(9) 3_766 . . . ?
C16S C1S C7S C17S 90(11) 3_766 . . . ?
C3S C1S C7S C17S 165(18) . . . . ?
C18S C1S C7S C3S 75(25) 3_766 . . . ?
C6S C1S C7S C3S -58(16) 3_766 . . . ?
C12S C1S C7S C3S -8(13) . . . . ?
C11S C1S C7S C3S 166(14) 3_766 . . . ?
C15S C1S C7S C3S -103(14) 3_766 . . . ?
C5S C1S C7S C3S 32(9) . . . . ?
C17S C1S C7S C3S -165(18) . . . . ?
C10S C1S C7S C3S -10(11) . . . . ?
C9S C1S C7S C3S -75(12) 3_766 . . . ?
C16S C1S C7S C3S -76(12) 3_766 . . . ?
C18S C1S C7S C12S 83(22) 3_766 . . . ?
C6S C1S C7S C12S -49(9) 3_766 . . . ?
C11S C1S C7S C12S 174(11) 3_766 . . . ?
C15S C1S C7S C12S -95(10) 3_766 . . . ?
C5S C1S C7S C12S 40(10) . . . . ?
C17S C1S C7S C12S -157(12) . . . . ?
C10S C1S C7S C12S -2(7) . . . . ?
C9S C1S C7S C12S -67(7) 3_766 . . . ?
C16S C1S C7S C12S -67(8) 3_766 . . . ?
C3S C1S C7S C12S 8(13) . . . . ?
C18S C1S C7S C11S -90(20) 3_766 . . 3_766 ?
C6S C1S C7S C11S 137(13) 3_766 . . 3_766 ?
C12S C1S C7S C11S -174(11) . . . 3_766 ?
C15S C1S C7S C11S 91(9) 3_766 . . 3_766 ?
C5S C1S C7S C11S -134(12) . . . 3_766 ?
C17S C1S C7S C11S 29(9) . . . 3_766 ?
C10S C1S C7S C11S -176(10) . . . 3_766 ?
C9S C1S C7S C11S 119(7) 3_766 . . 3_766 ?
C16S C1S C7S C11S 119(9) 3_766 . . 3_766 ?
C3S C1S C7S C11S -166(14) . . . 3_766 ?
C18S C1S C7S C10S 86(22) 3_766 . . . ?
C6S C1S C7S C10S -47(10) 3_766 . . . ?
C12S C1S C7S C10S 2(7) . . . . ?
C11S C1S C7S C10S 176(10) 3_766 . . . ?
C15S C1S C7S C10S -92(9) 3_766 . . . ?
C5S C1S C7S C10S 42(8) . . . . ?
C17S C1S C7S C10S -155(12) . . . . ?
C9S C1S C7S C10S -65(6) 3_766 . . . ?
C16S C1S C7S C10S -65(6) 3_766 . . . ?
C3S C1S C7S C10S 10(11) . . . . ?
C18S C1S C7S C16S 151(23) 3_766 . . 3_766 ?
C6S C1S C7S C16S 18(10) 3_766 . . 3_766 ?
C12S C1S C7S C16S 67(8) . . . 3_766 ?
C11S C1S C7S C16S -119(9) 3_766 . . 3_766 ?
C15S C1S C7S C16S -27(9) 3_766 . . 3_766 ?
C5S C1S C7S C16S 108(10) . . . 3_766 ?
C17S C1S C7S C16S -90(11) . . . 3_766 ?
C10S C1S C7S C16S 65(6) . . . 3_766 ?
C9S C1S C7S C16S 0(6) 3_766 . . 3_766 ?
C3S C1S C7S C16S 76(12) . . . 3_766 ?
C18S C1S C7S C14S 172(24) 3_766 . . . ?
C6S C1S C7S C14S 39(12) 3_766 . . . ?
C12S C1S C7S C14S 88(10) . . . . ?
C11S C1S C7S C14S -98(9) 3_766 . . . ?
C15S C1S C7S C14S -6(10) 3_766 . . . ?
C5S C1S C7S C14S 129(13) . . . . ?
C17S C1S C7S C14S -69(10) . . . . ?
C10S C1S C7S C14S 86(8) . . . . ?
C9S C1S C7S C14S 21(7) 3_766 . . . ?
C16S C1S C7S C14S 21(6) 3_766 . . . ?
C3S C1S C7S C14S 97(13) . . . . ?
C18S C1S C7S C4S 122(26) 3_766 . . . ?
C6S C1S C7S C4S -11(18) 3_766 . . . ?
C12S C1S C7S C4S 39(14) . . . . ?
C11S C1S C7S C4S -148(15) 3_766 . . . ?
C15S C1S C7S C4S -56(15) 3_766 . . . ?
C5S C1S C7S C4S 79(13) . . . . ?
C17S C1S C7S C4S -118(18) . . . . ?
C10S C1S C7S C4S 36(11) . . . . ?
C9S C1S C7S C4S -29(13) 3_766 . . . ?
C16S C1S C7S C4S -29(11) 3_766 . . . ?
C3S C1S C7S C4S 47(10) . . . . ?
C18S C1S C7S C6S 133(23) 3_766 . . 3_766 ?
C12S C1S C7S C6S 49(9) . . . 3_766 ?
C11S C1S C7S C6S -137(13) 3_766 . . 3_766 ?
C15S C1S C7S C6S -45(9) 3_766 . . 3_766 ?
C5S C1S C7S C6S 90(12) . . . 3_766 ?
C17S C1S C7S C6S -108(12) . . . 3_766 ?
C10S C1S C7S C6S 47(10) . . . 3_766 ?
C9S C1S C7S C6S -18(8) 3_766 . . 3_766 ?
C16S C1S C7S C6S -18(10) 3_766 . . 3_766 ?
C3S C1S C7S C6S 58(16) . . . 3_766 ?
C2S C4S C7S C5S 88(12) . . . . ?
C3S C4S C7S C5S -4(12) . . . . ?
C14S C4S C7S C5S 148(12) . . . . ?
C13S C4S C7S C5S 124(11) . . . . ?
C9S C4S C7S C5S 100(11) . . . . ?
C16S C4S C7S C5S 105(12) 3_766 . . . ?
C10S C4S C7S C5S 38(9) . . . . ?
C8S C4S C7S C5S 124(11) . . . . ?
C17S C4S C7S C5S 177(20) . . . . ?
C8S C4S C7S C5S 72(10) 3_766 . . . ?
C2S C4S C7S C18S 64(24) . . . 3_766 ?
C3S C4S C7S C18S -28(23) . . . 3_766 ?
C14S C4S C7S C18S 124(24) . . . 3_766 ?
C13S C4S C7S C18S 101(23) . . . 3_766 ?
C9S C4S C7S C18S 76(24) . . . 3_766 ?
C16S C4S C7S C18S 81(23) 3_766 . . 3_766 ?
C5S C4S C7S C18S -24(18) . . . 3_766 ?
C10S C4S C7S C18S 14(21) . . . 3_766 ?
C8S C4S C7S C18S 100(23) . . . 3_766 ?
C17S C4S C7S C18S 153(31) . . . 3_766 ?
C8S C4S C7S C18S 49(22) 3_766 . . 3_766 ?
C2S C4S C7S C17S -89(13) . . . . ?
C3S C4S C7S C17S 179(18) . . . . ?
C14S C4S C7S C17S -28(11) . . . . ?
C13S C4S C7S C17S -52(12) . . . . ?
C9S C4S C7S C17S -77(12) . . . . ?
C16S C4S C7S C17S -72(13) 3_766 . . . ?
C5S C4S C7S C17S -177(20) . . . . ?
C10S C4S C7S C17S -139(15) . . . . ?
C8S C4S C7S C17S -53(12) . . . . ?
C8S C4S C7S C17S -104(13) 3_766 . . . ?
C2S C4S C7S C3S 92(11) . . . . ?
C14S C4S C7S C3S 152(12) . . . . ?
C13S C4S C7S C3S 128(11) . . . . ?
C9S C4S C7S C3S 104(11) . . . . ?
C16S C4S C7S C3S 109(12) 3_766 . . . ?
C5S C4S C7S C3S 4(12) . . . . ?
C10S C4S C7S C3S 42(11) . . . . ?
C8S C4S C7S C3S 128(12) . . . . ?
C17S C4S C7S C3S -179(18) . . . . ?
C8S C4S C7S C3S 76(11) 3_766 . . . ?
C2S C4S C7S C12S 41(9) . . . . ?
C3S C4S C7S C12S -51(11) . . . . ?
C14S C4S C7S C12S 101(8) . . . . ?
C13S C4S C7S C12S 78(8) . . . . ?
C9S C4S C7S C12S 53(8) . . . . ?
C16S C4S C7S C12S 58(7) 3_766 . . . ?
C5S C4S C7S C12S -47(8) . . . . ?
C10S C4S C7S C12S -9(6) . . . . ?
C8S C4S C7S C12S 77(8) . . . . ?
C17S C4S C7S C12S 130(16) . . . . ?
C8S C4S C7S C12S 26(6) 3_766 . . . ?
C2S C4S C7S C1S 14(15) . . . . ?
C3S C4S C7S C1S -77(16) . . . . ?
C14S C4S C7S C1S 75(13) . . . . ?
C13S C4S C7S C1S 51(14) . . . . ?
C9S C4S C7S C1S 26(15) . . . . ?
C16S C4S C7S C1S 32(12) 3_766 . . . ?
C5S C4S C7S C1S -73(13) . . . . ?
C10S C4S C7S C1S -36(11) . . . . ?
C8S C4S C7S C1S 51(13) . . . . ?
C17S C4S C7S C1S 103(20) . . . . ?
C8S C4S C7S C1S -1(12) 3_766 . . . ?
C2S C4S C7S C11S -68(25) . . . 3_766 ?
C3S C4S C7S C11S -159(29) . . . 3_766 ?
C14S C4S C7S C11S -7(23) . . . 3_766 ?
C13S C4S C7S C11S -31(25) . . . 3_766 ?
C9S C4S C7S C11S -56(25) . . . 3_766 ?
C16S C4S C7S C11S -50(24) 3_766 . . 3_766 ?
C5S C4S C7S C11S -155(33) . . . 3_766 ?
C10S C4S C7S C11S -118(26) . . . 3_766 ?
C8S C4S C7S C11S -31(24) . . . 3_766 ?
C17S C4S C7S C11S 21(19) . . . 3_766 ?
C8S C4S C7S C11S -83(24) 3_766 . . 3_766 ?
C2S C4S C7S C10S 50(8) . . . . ?
C3S C4S C7S C10S -42(11) . . . . ?
C14S C4S C7S C10S 110(7) . . . . ?
C13S C4S C7S C10S 87(7) . . . . ?
C9S C4S C7S C10S 62(7) . . . . ?
C16S C4S C7S C10S 67(6) 3_766 . . . ?
C5S C4S C7S C10S -38(9) . . . . ?
C8S C4S C7S C10S 86(7) . . . . ?
C17S C4S C7S C10S 139(15) . . . . ?
C8S C4S C7S C10S 35(5) 3_766 . . . ?
C2S C4S C7S C16S -18(8) . . . 3_766 ?
C3S C4S C7S C16S -109(12) . . . 3_766 ?
C14S C4S C7S C16S 43(6) . . . 3_766 ?
C13S C4S C7S C16S 19(7) . . . 3_766 ?
C9S C4S C7S C16S -6(7) . . . 3_766 ?
C5S C4S C7S C16S -105(12) . . . 3_766 ?
C10S C4S C7S C16S -67(6) . . . 3_766 ?
C8S C4S C7S C16S 19(7) . . . 3_766 ?
C17S C4S C7S C16S 72(13) . . . 3_766 ?
C8S C4S C7S C16S -33(5) 3_766 . . 3_766 ?
C2S C4S C7S C14S -61(6) . . . . ?
C3S C4S C7S C14S -152(12) . . . . ?
C13S C4S C7S C14S -24(5) . . . . ?
C9S C4S C7S C14S -49(5) . . . . ?
C16S C4S C7S C14S -43(6) 3_766 . . . ?
C5S C4S C7S C14S -148(12) . . . . ?
C10S C4S C7S C14S -110(7) . . . . ?
C8S C4S C7S C14S -24(5) . . . . ?
C17S C4S C7S C14S 28(11) . . . . ?
C8S C4S C7S C14S -76(4) 3_766 . . . ?
C2S C4S C7S C6S 9(9) . . . 3_766 ?
C3S C4S C7S C6S -82(12) . . . 3_766 ?
C14S C4S C7S C6S 70(7) . . . 3_766 ?
C13S C4S C7S C6S 46(8) . . . 3_766 ?
C9S C4S C7S C6S 21(8) . . . 3_766 ?
C16S C4S C7S C6S 27(6) 3_766 . . 3_766 ?
C5S C4S C7S C6S -78(10) . . . 3_766 ?
C10S C4S C7S C6S -41(6) . . . 3_766 ?
C8S C4S C7S C6S 46(7) . . . 3_766 ?
C17S C4S C7S C6S 98(15) . . . 3_766 ?
C8S C4S C7S C6S -6(5) 3_766 . . 3_766 ?
C4S C2S C8S C13S 46(17) . . . . ?
C9S C2S C8S C13S -92(16) . . . . ?
C14S C2S C8S C13S 65(17) . . . . ?
C16S C2S C8S C13S 134(22) 3_766 . . . ?
C3S C2S C8S C13S 112(18) . . . . ?
C10S C2S C8S C13S 152(17) . . . . ?
C8S C2S C8S C13S 177(21) 3_766 . . . ?
C16S C2S C8S C13S -151(19) . . . . ?
C15S C2S C8S C13S -94(16) . . . . ?
C7S C2S C8S C13S 103(17) . . . . ?
C13S C2S C8S C16S -134(22) . . . 3_766 ?
C4S C2S C8S C16S -89(11) . . . 3_766 ?
C9S C2S C8S C16S 134(13) . . . 3_766 ?
C14S C2S C8S C16S -70(9) . . . 3_766 ?
C3S C2S C8S C16S -22(14) . . . 3_766 ?
C10S C2S C8S C16S 18(11) . . . 3_766 ?
C8S C2S C8S C16S 43(7) 3_766 . . 3_766 ?
C16S C2S C8S C16S 75(9) . . . 3_766 ?
C15S C2S C8S C16S 132(10) . . . 3_766 ?
C7S C2S C8S C16S -32(9) . . . 3_766 ?
C13S C2S C8S C10S 102(21) . . . 3_766 ?
C4S C2S C8S C10S 148(15) . . . 3_766 ?
C9S C2S C8S C10S 11(14) . . . 3_766 ?
C14S C2S C8S C10S 167(19) . . . 3_766 ?
C16S C2S C8S C10S -123(22) 3_766 . . 3_766 ?
C3S C2S C8S C10S -146(13) . . . 3_766 ?
C10S C2S C8S C10S -106(15) . . . 3_766 ?
C8S C2S C8S C10S -80(18) 3_766 . . 3_766 ?
C16S C2S C8S C10S -49(16) . . . 3_766 ?
C15S C2S C8S C10S 9(15) . . . 3_766 ?
C7S C2S C8S C10S -155(16) . . . 3_766 ?
C13S C2S C8S C14S -65(17) . . . . ?
C4S C2S C8S C14S -19(9) . . . . ?
C9S C2S C8S C14S -157(10) . . . . ?
C16S C2S C8S C14S 70(9) 3_766 . . . ?
C3S C2S C8S C14S 47(10) . . . . ?
C10S C2S C8S C14S 87(7) . . . . ?
C8S C2S C8S C14S 112(8) 3_766 . . . ?
C16S C2S C8S C14S 144(9) . . . . ?
C15S C2S C8S C14S -158(8) . . . . ?
C7S C2S C8S C14S 38(6) . . . . ?
C13S C2S C8S C9S 92(16) . . . . ?
C4S C2S C8S C9S 137(10) . . . . ?
C14S C2S C8S C9S 157(10) . . . . ?
C16S C2S C8S C9S -134(13) 3_766 . . . ?
C3S C2S C8S C9S -156(10) . . . . ?
C10S C2S C8S C9S -116(8) . . . . ?
C8S C2S C8S C9S -91(10) 3_766 . . . ?
C16S C2S C8S C9S -59(9) . . . . ?
C15S C2S C8S C9S -2(7) . . . . ?
C7S C2S C8S C9S -165(8) . . . . ?
C13S C2S C8S C16S 151(19) . . . . ?
C4S C2S C8S C16S -163(8) . . . . ?
C9S C2S C8S C16S 59(9) . . . . ?
C14S C2S C8S C16S -144(9) . . . . ?
C16S C2S C8S C16S -75(9) 3_766 . . . ?
C3S C2S C8S C16S -97(10) . . . . ?
C10S C2S C8S C16S -57(7) . . . . ?
C8S C2S C8S C16S -32(5) 3_766 . . . ?
C15S C2S C8S C16S 57(7) . . . . ?
C7S C2S C8S C16S -106(7) . . . . ?
C13S C2S C8S C12S 96(17) . . . 3_766 ?
C4S C2S C8S C12S 142(10) . . . 3_766 ?
C9S C2S C8S C12S 4(8) . . . 3_766 ?
C14S C2S C8S C12S 161(12) . . . 3_766 ?
C16S C2S C8S C12S -130(15) 3_766 . . 3_766 ?
C3S C2S C8S C12S -152(9) . . . 3_766 ?
C10S C2S C8S C12S -112(8) . . . 3_766 ?
C8S C2S C8S C12S -87(12) 3_766 . . 3_766 ?
C16S C2S C8S C12S -55(10) . . . 3_766 ?
C15S C2S C8S C12S 2(8) . . . 3_766 ?
C7S C2S C8S C12S -161(9) . . . 3_766 ?
C13S C2S C8S C6S 81(16) . . . . ?
C4S C2S C8S C6S 127(8) . . . . ?
C9S C2S C8S C6S -11(6) . . . . ?
C14S C2S C8S C6S 146(8) . . . . ?
C16S C2S C8S C6S -145(12) 3_766 . . . ?
C3S C2S C8S C6S -167(7) . . . . ?
C10S C2S C8S C6S -127(5) . . . . ?
C8S C2S C8S C6S -102(9) 3_766 . . . ?
C16S C2S C8S C6S -70(7) . . . . ?
C15S C2S C8S C6S -13(4) . . . . ?
C7S C2S C8S C6S -176(5) . . . . ?
C13S C2S C8S C2S -177(21) . . . 3_766 ?
C4S C2S C8S C2S -132(9) . . . 3_766 ?
C9S C2S C8S C2S 91(10) . . . 3_766 ?
C14S C2S C8S C2S -112(8) . . . 3_766 ?
C16S C2S C8S C2S -43(7) 3_766 . . 3_766 ?
C3S C2S C8S C2S -65(11) . . . 3_766 ?
C10S C2S C8S C2S -25(8) . . . 3_766 ?
C8S C2S C8S C2S 0.001(7) 3_766 . . 3_766 ?
C16S C2S C8S C2S 32(5) . . . 3_766 ?
C15S C2S C8S C2S 89(7) . . . 3_766 ?
C7S C2S C8S C2S -74(7) . . . 3_766 ?
C13S C2S C8S C9S -156(20) . . . 3_766 ?
C4S C2S C8S C9S -111(8) . . . 3_766 ?
C9S C2S C8S C9S 112(9) . . . 3_766 ?
C14S C2S C8S C9S -91(7) . . . 3_766 ?
C16S C2S C8S C9S -22(6) 3_766 . . 3_766 ?
C3S C2S C8S C9S -44(11) . . . 3_766 ?
C10S C2S C8S C9S -4(7) . . . 3_766 ?
C8S C2S C8S C9S 21(2) 3_766 . . 3_766 ?
C16S C2S C8S C9S 53(5) . . . 3_766 ?
C15S C2S C8S C9S 110(7) . . . 3_766 ?
C7S C2S C8S C9S -53(6) . . . 3_766 ?
C13S C2S C8S C8S -177(21) . . . 3_766 ?
C4S C2S C8S C8S -132(9) . . . 3_766 ?
C9S C2S C8S C8S 91(10) . . . 3_766 ?
C14S C2S C8S C8S -112(8) . . . 3_766 ?
C16S C2S C8S C8S -43(7) 3_766 . . 3_766 ?
C3S C2S C8S C8S -65(11) . . . 3_766 ?
C10S C2S C8S C8S -25(8) . . . 3_766 ?
C16S C2S C8S C8S 32(5) . . . 3_766 ?
C15S C2S C8S C8S 89(7) . . . 3_766 ?
C7S C2S C8S C8S -74(7) . . . 3_766 ?
C15S C6S C8S C13S 44(12) . . . . ?
C1S C6S C8S C13S 152(12) 3_766 . . . ?
C12S C6S C8S C13S 175(10) 3_766 . . . ?
C9S C6S C8S C13S 26(5) . . . . ?
C18S C6S C8S C13S 157(9) . . . . ?
C11S C6S C8S C13S 125(9) . . . . ?
C10S C6S C8S C13S -175(11) 3_766 . . . ?
C16S C6S C8S C13S 96(5) . . . . ?
C7S C6S C8S C13S 138(8) 3_766 . . . ?
C5S C6S C8S C13S 161(7) 3_766 . . . ?
C15S C6S C8S C16S -9(17) . . . 3_766 ?
C1S C6S C8S C16S 98(16) 3_766 . . 3_766 ?
C12S C6S C8S C16S 122(17) 3_766 . . 3_766 ?
C9S C6S C8S C16S -27(10) . . . 3_766 ?
C18S C6S C8S C16S 103(15) . . . 3_766 ?
C11S C6S C8S C16S 72(15) . . . 3_766 ?
C10S C6S C8S C16S 131(18) 3_766 . . 3_766 ?
C16S C6S C8S C16S 43(11) . . . 3_766 ?
C13S C6S C8S C16S -53(9) . . . 3_766 ?
C7S C6S C8S C16S 85(14) 3_766 . . 3_766 ?
C5S C6S C8S C16S 108(14) 3_766 . . 3_766 ?
C15S C6S C8S C10S -140(10) . . . 3_766 ?
C1S C6S C8S C10S -33(11) 3_766 . . 3_766 ?
C12S C6S C8S C10S -9(7) 3_766 . . 3_766 ?
C9S C6S C8S C10S -159(10) . . . 3_766 ?
C18S C6S C8S C10S -28(9) . . . 3_766 ?
C11S C6S C8S C10S -60(7) . . . 3_766 ?
C16S C6S C8S C10S -88(9) . . . 3_766 ?
C13S C6S C8S C10S 175(11) . . . 3_766 ?
C7S C6S C8S C10S -47(6) 3_766 . . 3_766 ?
C5S C6S C8S C10S -23(6) 3_766 . . 3_766 ?
C15S C6S C8S C14S 54(12) . . . . ?
C1S C6S C8S C14S 161(11) 3_766 . . . ?
C12S C6S C8S C14S -175(11) 3_766 . . . ?
C9S C6S C8S C14S 35(6) . . . . ?
C18S C6S C8S C14S 166(9) . . . . ?
C11S C6S C8S C14S 134(9) . . . . ?
C10S C6S C8S C14S -166(12) 3_766 . . . ?
C16S C6S C8S C14S 105(5) . . . . ?
C13S C6S C8S C14S 9(6) . . . . ?
C7S C6S C8S C14S 147(8) 3_766 . . . ?
C5S C6S C8S C14S 170(8) 3_766 . . . ?
C15S C6S C8S C9S 19(11) . . . . ?
C1S C6S C8S C9S 126(12) 3_766 . . . ?
C12S C6S C8S C9S 150(11) 3_766 . . . ?
C18S C6S C8S C9S 131(9) . . . . ?
C11S C6S C8S C9S 99(9) . . . . ?
C10S C6S C8S C9S 159(10) 3_766 . . . ?
C16S C6S C8S C9S 70(5) . . . . ?
C13S C6S C8S C9S -26(5) . . . . ?
C7S C6S C8S C9S 112(7) 3_766 . . . ?
C5S C6S C8S C9S 135(7) 3_766 . . . ?
C15S C6S C8S C16S -52(10) . . . . ?
C1S C6S C8S C16S 55(10) 3_766 . . . ?
C12S C6S C8S C16S 79(9) 3_766 . . . ?
C9S C6S C8S C16S -70(5) . . . . ?
C18S C6S C8S C16S 60(8) . . . . ?
C11S C6S C8S C16S 29(7) . . . . ?
C10S C6S C8S C16S 88(9) 3_766 . . . ?
C13S C6S C8S C16S -96(5) . . . . ?
C7S C6S C8S C16S 42(6) 3_766 . . . ?
C5S C6S C8S C16S 65(6) 3_766 . . . ?
C15S C6S C8S C2S 26(10) . . . . ?
C1S C6S C8S C2S 133(11) 3_766 . . . ?
C12S C6S C8S C2S 157(9) 3_766 . . . ?
C9S C6S C8S C2S 8(4) . . . . ?
C18S C6S C8S C2S 139(8) . . . . ?
C11S C6S C8S C2S 107(8) . . . . ?
C10S C6S C8S C2S 166(9) 3_766 . . . ?
C16S C6S C8S C2S 78(3) . . . . ?
C13S C6S C8S C2S -18(4) . . . . ?
C7S C6S C8S C2S 120(6) 3_766 . . . ?
C5S C6S C8S C2S 143(6) 3_766 . . . ?
C15S C6S C8S C12S -131(11) . . . 3_766 ?
C1S C6S C8S C12S -24(10) 3_766 . . 3_766 ?
C9S C6S C8S C12S -150(11) . . . 3_766 ?
C18S C6S C8S C12S -19(9) . . . 3_766 ?
C11S C6S C8S C12S -50(7) . . . 3_766 ?
C10S C6S C8S C12S 9(7) 3_766 . . 3_766 ?
C16S C6S C8S C12S -79(9) . . . 3_766 ?
C13S C6S C8S C12S -175(10) . . . 3_766 ?
C7S C6S C8S C12S -37(7) 3_766 . . 3_766 ?
C5S C6S C8S C12S -14(7) 3_766 . . 3_766 ?
C15S C6S C8S C2S -82(9) . . . 3_766 ?
C1S C6S C8S C2S 26(11) 3_766 . . 3_766 ?
C12S C6S C8S C2S 49(8) 3_766 . . 3_766 ?
C9S C6S C8S C2S -100(6) . . . 3_766 ?
C18S C6S C8S C2S 31(7) . . . 3_766 ?
C11S C6S C8S C2S -1(7) . . . 3_766 ?
C10S C6S C8S C2S 59(6) 3_766 . . 3_766 ?
C16S C6S C8S C2S -30(4) . . . 3_766 ?
C13S C6S C8S C2S -126(6) . . . 3_766 ?
C7S C6S C8S C2S 12(4) 3_766 . . 3_766 ?
C5S C6S C8S C2S 35(4) 3_766 . . 3_766 ?
C15S C6S C8S C9S -60(11) . . . 3_766 ?
C1S C6S C8S C9S 47(12) 3_766 . . 3_766 ?
C12S C6S C8S C9S 71(10) 3_766 . . 3_766 ?
C9S C6S C8S C9S -79(5) . . . 3_766 ?
C18S C6S C8S C9S 52(9) . . . 3_766 ?
C11S C6S C8S C9S 20(9) . . . 3_766 ?
C10S C6S C8S C9S 80(9) 3_766 . . 3_766 ?
C16S C6S C8S C9S -9(4) . . . 3_766 ?
C13S C6S C8S C9S -105(4) . . . 3_766 ?
C7S C6S C8S C9S 33(7) 3_766 . . 3_766 ?
C5S C6S C8S C9S 56(6) 3_766 . . 3_766 ?
C15S C6S C8S C8S -33(12) . . . 3_766 ?
C1S C6S C8S C8S 75(12) 3_766 . . 3_766 ?
C12S C6S C8S C8S 98(12) 3_766 . . 3_766 ?
C9S C6S C8S C8S -51(5) . . . 3_766 ?
C18S C6S C8S C8S 80(10) . . . 3_766 ?
C11S C6S C8S C8S 48(10) . . . 3_766 ?
C10S C6S C8S C8S 108(12) 3_766 . . 3_766 ?
C16S C6S C8S C8S 19(5) . . . 3_766 ?
C13S C6S C8S C8S -77(4) . . . 3_766 ?
C7S C6S C8S C8S 61(8) 3_766 . . 3_766 ?
C5S C6S C8S C8S 84(9) 3_766 . . 3_766 ?
C4S C2S C9S C13S -69(15) . . . . ?
C14S C2S C9S C13S 11(9) . . . . ?
C16S C2S C9S C13S 59(9) 3_766 . . . ?
C3S C2S C9S C13S 121(21) . . . . ?
C8S C2S C9S C13S 29(9) . . . . ?
C10S C2S C9S C13S 113(9) . . . . ?
C8S C2S C9S C13S 102(8) 3_766 . . . ?
C16S C2S C9S C13S 89(9) . . . . ?
C15S C2S C9S C13S -156(18) . . . . ?
C7S C2S C9S C13S 52(12) . . . . ?
C13S C2S C9S C15S 156(18) . . . . ?
C4S C2S C9S C15S 88(20) . . . . ?
C14S C2S C9S C15S 167(14) . . . . ?
C16S C2S C9S C15S -144(15) 3_766 . . . ?
C3S C2S C9S C15S -82(25) . . . . ?
C8S C2S C9S C15S -175(18) . . . . ?
C10S C2S C9S C15S -90(15) . . . . ?
C8S C2S C9S C15S -101(15) 3_766 . . . ?
C16S C2S C9S C15S -115(17) . . . . ?
C7S C2S C9S C15S -152(13) . . . . ?
C13S C2S C9S C6S 66(26) . . . . ?
C4S C2S C9S C6S -3(35) . . . . ?
C14S C2S C9S C6S 77(25) . . . . ?
C16S C2S C9S C6S 125(25) 3_766 . . . ?
C3S C2S C9S C6S -173(19) . . . . ?
C8S C2S C9S C6S 95(27) . . . . ?
C10S C2S C9S C6S 179(100) . . . . ?
C8S C2S C9S C6S 168(26) 3_766 . . . ?
C16S C2S C9S C6S 155(29) . . . . ?
C15S C2S C9S C6S -90(28) . . . . ?
C7S C2S C9S C6S 118(23) . . . . ?
C13S C2S C9S C8S -29(9) . . . . ?
C4S C2S C9S C8S -97(14) . . . . ?
C14S C2S C9S C8S -18(8) . . . . ?
C16S C2S C9S C8S 31(9) 3_766 . . . ?
C3S C2S C9S C8S 93(21) . . . . ?
C10S C2S C9S C8S 85(8) . . . . ?
C8S C2S C9S C8S 74(8) 3_766 . . . ?
C16S C2S C9S C8S 60(7) . . . . ?
C15S C2S C9S C8S 175(18) . . . . ?
C7S C2S C9S C8S 23(12) . . . . ?
C13S C2S C9S C16S -89(9) . . . . ?
C4S C2S C9S C16S -157(12) . . . . ?
C14S C2S C9S C16S -78(8) . . . . ?
C16S C2S C9S C16S -29(11) 3_766 . . . ?
C3S C2S C9S C16S 33(22) . . . . ?
C8S C2S C9S C16S -60(7) . . . . ?
C10S C2S C9S C16S 25(9) . . . . ?
C8S C2S C9S C16S 14(7) 3_766 . . . ?
C15S C2S C9S C16S 115(17) . . . . ?
C7S C2S C9S C16S -37(12) . . . . ?
C13S C2S C9S C14S -11(9) . . . . ?
C4S C2S C9S C14S -79(14) . . . . ?
C16S C2S C9S C14S 49(6) 3_766 . . . ?
C3S C2S C9S C14S 110(20) . . . . ?
C8S C2S C9S C14S 18(8) . . . . ?
C10S C2S C9S C14S 102(6) . . . . ?
C8S C2S C9S C14S 92(5) 3_766 . . . ?
C16S C2S C9S C14S 78(8) . . . . ?
C15S C2S C9S C14S -167(14) . . . . ?
C7S C2S C9S C14S 41(8) . . . . ?
C13S C2S C9S C4S 69(15) . . . . ?
C14S C2S C9S C4S 79(14) . . . . ?
C16S C2S C9S C4S 128(15) 3_766 . . . ?
C3S C2S C9S C4S -170(29) . . . . ?
C8S C2S C9S C4S 97(14) . . . . ?
C10S C2S C9S C4S -178(16) . . . . ?
C8S C2S C9S C4S 171(13) 3_766 . . . ?
C16S C2S C9S C4S 157(12) . . . . ?
C15S C2S C9S C4S -88(20) . . . . ?
C7S C2S C9S C4S 120(19) . . . . ?
C13S C2S C9S C16S -59(9) . . . 3_766 ?
C4S C2S C9S C16S -128(15) . . . 3_766 ?
C14S C2S C9S C16S -49(6) . . . 3_766 ?
C3S C2S C9S C16S 62(19) . . . 3_766 ?
C8S C2S C9S C16S -31(9) . . . 3_766 ?
C10S C2S C9S C16S 54(6) . . . 3_766 ?
C8S C2S C9S C16S 43(5) 3_766 . . 3_766 ?
C16S C2S C9S C16S 29(11) . . . 3_766 ?
C15S C2S C9S C16S 144(16) . . . 3_766 ?
C7S C2S C9S C16S -8(10) . . . 3_766 ?
C13S C2S C9S C8S -102(8) . . . 3_766 ?
C4S C2S C9S C8S -171(13) . . . 3_766 ?
C14S C2S C9S C8S -92(5) . . . 3_766 ?
C16S C2S C9S C8S -43(5) 3_766 . . 3_766 ?
C3S C2S C9S C8S 19(19) . . . 3_766 ?
C8S C2S C9S C8S -74(8) . . . 3_766 ?
C10S C2S C9S C8S 11(5) . . . 3_766 ?
C16S C2S C9S C8S -14(7) . . . 3_766 ?
C15S C2S C9S C8S 101(15) . . . 3_766 ?
C7S C2S C9S C8S -51(9) . . . 3_766 ?
C13S C2S C9S C12S -36(15) . . . 3_766 ?
C4S C2S C9S C12S -104(17) . . . 3_766 ?
C14S C2S C9S C12S -25(16) . . . 3_766 ?
C16S C2S C9S C12S 24(16) 3_766 . . 3_766 ?
C3S C2S C9S C12S 86(26) . . . 3_766 ?
C8S C2S C9S C12S -7(14) . . . 3_766 ?
C10S C2S C9S C12S 78(17) . . . 3_766 ?
C8S C2S C9S C12S 67(15) 3_766 . . 3_766 ?
C16S C2S C9S C12S 53(14) . . . 3_766 ?
C15S C2S C9S C12S 168(27) . . . 3_766 ?
C7S C2S C9S C12S 16(22) . . . 3_766 ?
C13S C2S C9S C1S 172(100) . . . 3_766 ?
C4S C2S C9S C1S 103(100) . . . 3_766 ?
C14S C2S C9S C1S -177(100) . . . 3_766 ?
C16S C2S C9S C1S -129(100) 3_766 . . 3_766 ?
C3S C2S C9S C1S -67(100) . . . 3_766 ?
C8S C2S C9S C1S -159(100) . . . 3_766 ?
C10S C2S C9S C1S -75(100) . . . 3_766 ?
C8S C2S C9S C1S -86(100) 3_766 . . 3_766 ?
C16S C2S C9S C1S -99(100) . . . 3_766 ?
C15S C2S C9S C1S 16(92) . . . 3_766 ?
C7S C2S C9S C1S -136(98) . . . 3_766 ?
C15S C6S C9S C13S 165(14) . . . . ?
C1S C6S C9S C13S -135(14) 3_766 . . . ?
C12S C6S C9S C13S -66(11) 3_766 . . . ?
C18S C6S C9S C13S -105(13) . . . . ?
C11S C6S C9S C13S -149(10) . . . . ?
C10S C6S C9S C13S -53(10) 3_766 . . . ?
C16S C6S C9S C13S -98(10) . . . . ?
C8S C6S C9S C13S -38(10) . . . . ?
C7S C6S C9S C13S -105(10) 3_766 . . . ?
C5S C6S C9S C13S -84(10) 3_766 . . . ?
C15S C6S C9S C2S 106(28) . . . . ?
C1S C6S C9S C2S 167(23) 3_766 . . . ?
C12S C6S C9S C2S -124(24) 3_766 . . . ?
C18S C6S C9S C2S -163(23) . . . . ?
C11S C6S C9S C2S 152(24) . . . . ?
C10S C6S C9S C2S -111(25) 3_766 . . . ?
C16S C6S C9S C2S -156(27) . . . . ?
C8S C6S C9S C2S -96(27) . . . . ?
C13S C6S C9S C2S -58(25) . . . . ?
C7S C6S C9S C2S -163(24) 3_766 . . . ?
C5S C6S C9S C2S -143(24) 3_766 . . . ?
C1S C6S C9S C15S 60(14) 3_766 . . . ?
C12S C6S C9S C15S 130(11) 3_766 . . . ?
C18S C6S C9S C15S 91(12) . . . . ?
C11S C6S C9S C15S 46(10) . . . . ?
C10S C6S C9S C15S 143(10) 3_766 . . . ?
C16S C6S C9S C15S 98(10) . . . . ?
C8S C6S C9S C15S 158(12) . . . . ?
C13S C6S C9S C15S -165(14) . . . . ?
C7S C6S C9S C15S 91(9) 3_766 . . . ?
C5S C6S C9S C15S 111(10) 3_766 . . . ?
C15S C6S C9S C8S -158(12) . . . . ?
C1S C6S C9S C8S -97(14) 3_766 . . . ?
C12S C6S C9S C8S -28(10) 3_766 . . . ?
C18S C6S C9S C8S -67(11) . . . . ?
C11S C6S C9S C8S -112(9) . . . . ?
C10S C6S C9S C8S -15(8) 3_766 . . . ?
C16S C6S C9S C8S -60(7) . . . . ?
C13S C6S C9S C8S 38(10) . . . . ?
C7S C6S C9S C8S -67(8) 3_766 . . . ?
C5S C6S C9S C8S -47(8) 3_766 . . . ?
C15S C6S C9S C16S -98(10) . . . . ?
C1S C6S C9S C16S -37(13) 3_766 . . . ?
C12S C6S C9S C16S 32(8) 3_766 . . . ?
C18S C6S C9S C16S -7(10) . . . . ?
C11S C6S C9S C16S -52(8) . . . . ?
C10S C6S C9S C16S 45(6) 3_766 . . . ?
C8S C6S C9S C16S 60(7) . . . . ?
C13S C6S C9S C16S 98(10) . . . . ?
C7S C6S C9S C16S -7(6) 3_766 . . . ?
C5S C6S C9S C16S 13(6) 3_766 . . . ?
C15S C6S C9S C14S 172(12) . . . . ?
C1S C6S C9S C14S -127(13) 3_766 . . . ?
C12S C6S C9S C14S -58(9) 3_766 . . . ?
C18S C6S C9S C14S -97(11) . . . . ?
C11S C6S C9S C14S -142(8) . . . . ?
C10S C6S C9S C14S -45(7) 3_766 . . . ?
C16S C6S C9S C14S -90(8) . . . . ?
C8S C6S C9S C14S -30(8) . . . . ?
C13S C6S C9S C14S 8(8) . . . . ?
C7S C6S C9S C14S -97(7) 3_766 . . . ?
C5S C6S C9S C14S -77(8) 3_766 . . . ?
C15S C6S C9S C4S 105(13) . . . . ?
C1S C6S C9S C4S 165(10) 3_766 . . . ?
C12S C6S C9S C4S -125(9) 3_766 . . . ?
C18S C6S C9S C4S -164(9) . . . . ?
C11S C6S C9S C4S 151(8) . . . . ?
C10S C6S C9S C4S -112(9) 3_766 . . . ?
C16S C6S C9S C4S -157(11) . . . . ?
C8S C6S C9S C4S -97(12) . . . . ?
C13S C6S C9S C4S -60(11) . . . . ?
C7S C6S C9S C4S -164(8) 3_766 . . . ?
C5S C6S C9S C4S -144(8) 3_766 . . . ?
C15S C6S C9S C16S -136(13) . . . 3_766 ?
C1S C6S C9S C16S -76(15) 3_766 . . 3_766 ?
C12S C6S C9S C16S -7(10) 3_766 . . 3_766 ?
C18S C6S C9S C16S -46(13) . . . 3_766 ?
C11S C6S C9S C16S -90(10) . . . 3_766 ?
C10S C6S C9S C16S 6(8) 3_766 . . 3_766 ?
C16S C6S C9S C16S -39(11) . . . 3_766 ?
C8S C6S C9S C16S 21(10) . . . 3_766 ?
C13S C6S C9S C16S 59(9) . . . 3_766 ?
C7S C6S C9S C16S -46(9) 3_766 . . 3_766 ?
C5S C6S C9S C16S -25(9) 3_766 . . 3_766 ?
C15S C6S C9S C8S -86(10) . . . 3_766 ?
C1S C6S C9S C8S -26(14) 3_766 . . 3_766 ?
C12S C6S C9S C8S 43(8) 3_766 . . 3_766 ?
C18S C6S C9S C8S 4(11) . . . 3_766 ?
C11S C6S C9S C8S -40(8) . . . 3_766 ?
C10S C6S C9S C8S 56(5) 3_766 . . 3_766 ?
C16S C6S C9S C8S 11(6) . . . 3_766 ?
C8S C6S C9S C8S 71(9) . . . 3_766 ?
C13S C6S C9S C8S 109(10) . . . 3_766 ?
C7S C6S C9S C8S 4(6) 3_766 . . 3_766 ?
C5S C6S C9S C8S 25(7) 3_766 . . 3_766 ?
C15S C6S C9S C12S -130(11) . . . 3_766 ?
C1S C6S C9S C12S -69(10) 3_766 . . 3_766 ?
C18S C6S C9S C12S -39(8) . . . 3_766 ?
C11S C6S C9S C12S -84(7) . . . 3_766 ?
C10S C6S C9S C12S 13(5) 3_766 . . 3_766 ?
C16S C6S C9S C12S -32(8) . . . 3_766 ?
C8S C6S C9S C12S 28(10) . . . 3_766 ?
C13S C6S C9S C12S 66(11) . . . 3_766 ?
C7S C6S C9S C12S -39(5) 3_766 . . 3_766 ?
C5S C6S C9S C12S -19(4) 3_766 . . 3_766 ?
C15S C6S C9S C1S -60(14) . . . 3_766 ?
C12S C6S C9S C1S 69(10) 3_766 . . 3_766 ?
C18S C6S C9S C1S 30(11) . . . 3_766 ?
C11S C6S C9S C1S -14(11) . . . 3_766 ?
C10S C6S C9S C1S 82(12) 3_766 . . 3_766 ?
C16S C6S C9S C1S 37(13) . . . 3_766 ?
C8S C6S C9S C1S 97(14) . . . 3_766 ?
C13S C6S C9S C1S 135(14) . . . 3_766 ?
C7S C6S C9S C1S 30(11) 3_766 . . 3_766 ?
C5S C6S C9S C1S 51(11) 3_766 . . 3_766 ?
C16S C8S C9S C13S -68(11) 3_766 . . . ?
C10S C8S C9S C13S 156(12) 3_766 . . . ?
C14S C8S C9S C13S -14(9) . . . . ?
C16S C8S C9S C13S -140(9) . . . . ?
C2S C8S C9S C13S -31(7) . . . . ?
C12S C8S C9S C13S 153(10) 3_766 . . . ?
C6S C8S C9S C13S 135(9) . . . . ?
C2S C8S C9S C13S -131(9) 3_766 . . . ?
C9S C8S C9S C13S -104(10) 3_766 . . . ?
C8S C8S C9S C13S -104(10) 3_766 . . . ?
C13S C8S C9S C2S 31(7) . . . . ?
C16S C8S C9S C2S -37(10) 3_766 . . . ?
C10S C8S C9S C2S -173(9) 3_766 . . . ?
C14S C8S C9S C2S 17(7) . . . . ?
C16S C8S C9S C2S -109(9) . . . . ?
C12S C8S C9S C2S -176(8) 3_766 . . . ?
C6S C8S C9S C2S 166(8) . . . . ?
C2S C8S C9S C2S -100(7) 3_766 . . . ?
C9S C8S C9S C2S -72(8) 3_766 . . . ?
C8S C8S C9S C2S -72(8) 3_766 . . . ?
C13S C8S C9S C15S -153(14) . . . . ?
C16S C8S C9S C15S 139(12) 3_766 . . . ?
C10S C8S C9S C15S 3(16) 3_766 . . . ?
C14S C8S C9S C15S -167(11) . . . . ?
C16S C8S C9S C15S 67(11) . . . . ?
C2S C8S C9S C15S 176(14) . . . . ?
C12S C8S C9S C15S 0(13) 3_766 . . . ?
C6S C8S C9S C15S -18(9) . . . . ?
C2S C8S C9S C15S 76(11) 3_766 . . . ?
C9S C8S C9S C15S 104(10) 3_766 . . . ?
C8S C8S C9S C15S 104(10) 3_766 . . . ?
C13S C8S C9S C6S -135(9) . . . . ?
C16S C8S C9S C6S 157(10) 3_766 . . . ?
C10S C8S C9S C6S 21(9) 3_766 . . . ?
C14S C8S C9S C6S -149(6) . . . . ?
C16S C8S C9S C6S 85(6) . . . . ?
C2S C8S C9S C6S -166(8) . . . . ?
C12S C8S C9S C6S 18(6) 3_766 . . . ?
C2S C8S C9S C6S 94(6) 3_766 . . . ?
C9S C8S C9S C6S 122(7) 3_766 . . . ?
C8S C8S C9S C6S 122(7) 3_766 . . . ?
C13S C8S C9S C16S 140(9) . . . . ?
C16S C8S C9S C16S 72(7) 3_766 . . . ?
C10S C8S C9S C16S -64(11) 3_766 . . . ?
C14S C8S C9S C16S 126(7) . . . . ?
C2S C8S C9S C16S 109(9) . . . . ?
C12S C8S C9S C16S -67(9) 3_766 . . . ?
C6S C8S C9S C16S -85(6) . . . . ?
C2S C8S C9S C16S 9(5) 3_766 . . . ?
C9S C8S C9S C16S 36(5) 3_766 . . . ?
C8S C8S C9S C16S 36(5) 3_766 . . . ?
C13S C8S C9S C14S 14(9) . . . . ?
C16S C8S C9S C14S -54(7) 3_766 . . . ?
C10S C8S C9S C14S 170(12) 3_766 . . . ?
C16S C8S C9S C14S -126(7) . . . . ?
C2S C8S C9S C14S -17(7) . . . . ?
C12S C8S C9S C14S 167(9) 3_766 . . . ?
C6S C8S C9S C14S 149(6) . . . . ?
C2S C8S C9S C14S -117(6) 3_766 . . . ?
C9S C8S C9S C14S -90(6) 3_766 . . . ?
C8S C8S C9S C14S -90(6) 3_766 . . . ?
C13S C8S C9S C4S 15(7) . . . . ?
C16S C8S C9S C4S -53(9) 3_766 . . . ?
C10S C8S C9S C4S 171(8) 3_766 . . . ?
C14S C8S C9S C4S 2(6) . . . . ?
C16S C8S C9S C4S -124(7) . . . . ?
C2S C8S C9S C4S -16(4) . . . . ?
C12S C8S C9S C4S 168(6) 3_766 . . . ?
C6S C8S C9S C4S 150(6) . . . . ?
C2S C8S C9S C4S -116(6) 3_766 . . . ?
C9S C8S C9S C4S -88(7) 3_766 . . . ?
C8S C8S C9S C4S -88(7) 3_766 . . . ?
C13S C8S C9S C16S 68(11) . . . 3_766 ?
C10S C8S C9S C16S -136(16) 3_766 . . 3_766 ?
C14S C8S C9S C16S 54(7) . . . 3_766 ?
C16S C8S C9S C16S -72(7) . . . 3_766 ?
C2S C8S C9S C16S 37(10) . . . 3_766 ?
C12S C8S C9S C16S -139(13) 3_766 . . 3_766 ?
C6S C8S C9S C16S -157(10) . . . 3_766 ?
C2S C8S C9S C16S -63(6) 3_766 . . 3_766 ?
C9S C8S C9S C16S -35(5) 3_766 . . 3_766 ?
C8S C8S C9S C16S -35(5) 3_766 . . 3_766 ?
C13S C8S C9S C8S 104(10) . . . 3_766 ?
C16S C8S C9S C8S 35(5) 3_766 . . 3_766 ?
C10S C8S C9S C8S -101(13) 3_766 . . 3_766 ?
C14S C8S C9S C8S 90(6) . . . 3_766 ?
C16S C8S C9S C8S -36(5) . . . 3_766 ?
C2S C8S C9S C8S 72(8) . . . 3_766 ?
C12S C8S C9S C8S -104(10) 3_766 . . 3_766 ?
C6S C8S C9S C8S -122(7) . . . 3_766 ?
C2S C8S C9S C8S -27(3) 3_766 . . 3_766 ?
C9S C8S C9S C8S 0.005(7) 3_766 . . 3_766 ?
C13S C8S C9S C12S -153(10) . . . 3_766 ?
C16S C8S C9S C12S 139(13) 3_766 . . 3_766 ?
C10S C8S C9S C12S 3(7) 3_766 . . 3_766 ?
C14S C8S C9S C12S -167(9) . . . 3_766 ?
C16S C8S C9S C12S 67(9) . . . 3_766 ?
C2S C8S C9S C12S 176(8) . . . 3_766 ?
C6S C8S C9S C12S -18(6) . . . 3_766 ?
C2S C8S C9S C12S 76(9) 3_766 . . 3_766 ?
C9S C8S C9S C12S 104(10) 3_766 . . 3_766 ?
C8S C8S C9S C12S 104(10) 3_766 . . 3_766 ?
C13S C8S C9S C1S -150(9) . . . 3_766 ?
C16S C8S C9S C1S 142(9) 3_766 . . 3_766 ?
C10S C8S C9S C1S 5(9) 3_766 . . 3_766 ?
C14S C8S C9S C1S -164(6) . . . 3_766 ?
C16S C8S C9S C1S 70(6) . . . 3_766 ?
C2S C8S C9S C1S 179(7) . . . 3_766 ?
C12S C8S C9S C1S 3(6) 3_766 . . 3_766 ?
C6S C8S C9S C1S -16(2) . . . 3_766 ?
C2S C8S C9S C1S 79(6) 3_766 . . 3_766 ?
C9S C8S C9S C1S 106(7) 3_766 . . 3_766 ?
C8S C8S C9S C1S 106(7) 3_766 . . 3_766 ?
C2S C4S C9S C13S 100(16) . . . . ?
C3S C4S C9S C13S 104(11) . . . . ?
C14S C4S C9S C13S 14(9) . . . . ?
C7S C4S C9S C13S 59(9) . . . . ?
C16S C4S C9S C13S 54(8) 3_766 . . . ?
C5S C4S C9S C13S 83(9) . . . . ?
C10S C4S C9S C13S 101(8) . . . . ?
C8S C4S C9S C13S 15(8) . . . . ?
C17S C4S C9S C13S 38(8) . . . . ?
C8S C4S C9S C13S 91(8) 3_766 . . . ?
C3S C4S C9S C2S 4(13) . . . . ?
C14S C4S C9S C2S -86(13) . . . . ?
C13S C4S C9S C2S -100(16) . . . . ?
C7S C4S C9S C2S -41(13) . . . . ?
C16S C4S C9S C2S -46(14) 3_766 . . . ?
C5S C4S C9S C2S -17(13) . . . . ?
C10S C4S C9S C2S 1(13) . . . . ?
C8S C4S C9S C2S -85(14) . . . . ?
C17S C4S C9S C2S -62(13) . . . . ?
C8S C4S C9S C2S -9(13) 3_766 . . . ?
C2S C4S C9S C15S -110(18) . . . . ?
C3S C4S C9S C15S -105(13) . . . . ?
C14S C4S C9S C15S 164(12) . . . . ?
C13S C4S C9S C15S 151(16) . . . . ?
C7S C4S C9S C15S -151(11) . . . . ?
C16S C4S C9S C15S -156(13) 3_766 . . . ?
C5S C4S C9S C15S -126(11) . . . . ?
C10S C4S C9S C15S -108(11) . . . . ?
C8S C4S C9S C15S 166(15) . . . . ?
C17S C4S C9S C15S -172(10) . . . . ?
C8S C4S C9S C15S -118(12) 3_766 . . . ?
C2S C4S C9S C6S 179(17) . . . . ?
C3S C4S C9S C6S -177(9) . . . . ?
C14S C4S C9S C6S 92(10) . . . . ?
C13S C4S C9S C6S 79(12) . . . . ?
C7S C4S C9S C6S 138(9) . . . . ?
C16S C4S C9S C6S 132(11) 3_766 . . . ?
C5S C4S C9S C6S 162(8) . . . . ?
C10S C4S C9S C6S -180(9) . . . . ?
C8S C4S C9S C6S 94(11) . . . . ?
C17S C4S C9S C6S 117(9) . . . . ?
C8S C4S C9S C6S 170(10) 3_766 . . . ?
C2S C4S C9S C8S 85(14) . . . . ?
C3S C4S C9S C8S 89(9) . . . . ?
C14S C4S C9S C8S -2(7) . . . . ?
C13S C4S C9S C8S -15(8) . . . . ?
C7S C4S C9S C8S 44(7) . . . . ?
C16S C4S C9S C8S 39(7) 3_766 . . . ?
C5S C4S C9S C8S 68(7) . . . . ?
C10S C4S C9S C8S 86(6) . . . . ?
C17S C4S C9S C8S 23(7) . . . . ?
C8S C4S C9S C8S 76(6) 3_766 . . . ?
C2S C4S C9S C16S 26(13) . . . . ?
C3S C4S C9S C16S 30(10) . . . . ?
C14S C4S C9S C16S -60(8) . . . . ?
C13S C4S C9S C16S -74(9) . . . . ?
C7S C4S C9S C16S -15(8) . . . . ?
C16S C4S C9S C16S -20(10) 3_766 . . . ?
C5S C4S C9S C16S 9(8) . . . . ?
C10S C4S C9S C16S 27(7) . . . . ?
C8S C4S C9S C16S -59(7) . . . . ?
C17S C4S C9S C16S -36(7) . . . . ?
C8S C4S C9S C16S 17(7) 3_766 . . . ?
C2S C4S C9S C14S 86(13) . . . . ?
C3S C4S C9S C14S 91(7) . . . . ?
C13S C4S C9S C14S -14(9) . . . . ?
C7S C4S C9S C14S 45(5) . . . . ?
C16S C4S C9S C14S 40(6) 3_766 . . . ?
C5S C4S C9S C14S 70(5) . . . . ?
C10S C4S C9S C14S 88(5) . . . . ?
C8S C4S C9S C14S 2(7) . . . . ?
C17S C4S C9S C14S 24(4) . . . . ?
C8S C4S C9S C14S 78(5) 3_766 . . . ?
C2S C4S C9S C16S 46(14) . . . 3_766 ?
C3S C4S C9S C16S 51(8) . . . 3_766 ?
C14S C4S C9S C16S -40(6) . . . 3_766 ?
C13S C4S C9S C16S -54(8) . . . 3_766 ?
C7S C4S C9S C16S 5(7) . . . 3_766 ?
C5S C4S C9S C16S 30(6) . . . 3_766 ?
C10S C4S C9S C16S 48(5) . . . 3_766 ?
C8S C4S C9S C16S -39(7) . . . 3_766 ?
C17S C4S C9S C16S -16(6) . . . 3_766 ?
C8S C4S C9S C16S 38(5) 3_766 . . 3_766 ?
C2S C4S C9S C8S 9(13) . . . 3_766 ?
C3S C4S C9S C8S 13(7) . . . 3_766 ?
C14S C4S C9S C8S -78(5) . . . 3_766 ?
C13S C4S C9S C8S -91(8) . . . 3_766 ?
C7S C4S C9S C8S -32(5) . . . 3_766 ?
C16S C4S C9S C8S -38(5) 3_766 . . 3_766 ?
C5S C4S C9S C8S -8(5) . . . 3_766 ?
C10S C4S C9S C8S 10(4) . . . 3_766 ?
C8S C4S C9S C8S -76(6) . . . 3_766 ?
C17S C4S C9S C8S -53(4) . . . 3_766 ?
C2S C4S C9S C12S 106(18) . . . 3_766 ?
C3S C4S C9S C12S 110(13) . . . 3_766 ?
C14S C4S C9S C12S 20(13) . . . 3_766 ?
C13S C4S C9S C12S 6(13) . . . 3_766 ?
C7S C4S C9S C12S 65(14) . . . 3_766 ?
C16S C4S C9S C12S 60(13) 3_766 . . 3_766 ?
C5S C4S C9S C12S 89(13) . . . 3_766 ?
C10S C4S C9S C12S 107(13) . . . 3_766 ?
C8S C4S C9S C12S 21(12) . . . 3_766 ?
C17S C4S C9S C12S 44(14) . . . 3_766 ?
C8S C4S C9S C12S 97(13) 3_766 . . 3_766 ?
C2S C4S C9S C1S -166(22) . . . 3_766 ?
C3S C4S C9S C1S -162(14) . . . 3_766 ?
C14S C4S C9S C1S 107(16) . . . 3_766 ?
C13S C4S C9S C1S 94(18) . . . 3_766 ?
C7S C4S C9S C1S 153(14) . . . 3_766 ?
C16S C4S C9S C1S 147(17) 3_766 . . 3_766 ?
C5S C4S C9S C1S 177(14) . . . 3_766 ?
C10S C4S C9S C1S -165(15) . . . 3_766 ?
C8S C4S C9S C1S 109(18) . . . 3_766 ?
C17S C4S C9S C1S 132(14) . . . 3_766 ?
C8S C4S C9S C1S -175(17) 3_766 . . 3_766 ?
C7S C5S C10S C12S -72(17) . . . . ?
C18S C5S C10S C12S 3(16) 3_766 . . . ?
C3S C5S C10S C12S -149(14) . . . . ?
C1S C5S C10S C12S -2(11) . . . . ?
C17S C5S C10S C12S -51(13) . . . . ?
C11S C5S C10S C12S -15(13) 3_766 . . . ?
C4S C5S C10S C12S -128(12) . . . . ?
C6S C5S C10S C12S -9(11) 3_766 . . . ?
C16S C5S C10S C12S -72(12) 3_766 . . . ?
C2S C5S C10S C12S -117(12) . . . . ?
C7S C5S C10S C8S -14(20) . . . 3_766 ?
C18S C5S C10S C8S 62(18) 3_766 . . 3_766 ?
C3S C5S C10S C8S -90(13) . . . 3_766 ?
C12S C5S C10S C8S 59(16) . . . 3_766 ?
C1S C5S C10S C8S 57(13) . . . 3_766 ?
C17S C5S C10S C8S 7(17) . . . 3_766 ?
C11S C5S C10S C8S 44(16) 3_766 . . 3_766 ?
C4S C5S C10S C8S -69(12) . . . 3_766 ?
C6S C5S C10S C8S 50(11) 3_766 . . 3_766 ?
C16S C5S C10S C8S -13(10) 3_766 . . 3_766 ?
C2S C5S C10S C8S -58(11) . . . 3_766 ?
C7S C5S C10S C3S 76(14) . . . . ?
C18S C5S C10S C3S 152(16) 3_766 . . . ?
C12S C5S C10S C3S 149(14) . . . . ?
C1S C5S C10S C3S 147(9) . . . . ?
C17S C5S C10S C3S 97(10) . . . . ?
C11S C5S C10S C3S 134(10) 3_766 . . . ?
C4S C5S C10S C3S 21(6) . . . . ?
C6S C5S C10S C3S 140(8) 3_766 . . . ?
C16S C5S C10S C3S 77(7) 3_766 . . . ?
C2S C5S C10S C3S 32(6) . . . . ?
C18S C5S C10S C7S 76(15) 3_766 . . . ?
C3S C5S C10S C7S -76(14) . . . . ?
C12S C5S C10S C7S 72(17) . . . . ?
C1S C5S C10S C7S 71(12) . . . . ?
C17S C5S C10S C7S 21(10) . . . . ?
C11S C5S C10S C7S 58(12) 3_766 . . . ?
C4S C5S C10S C7S -55(12) . . . . ?
C6S C5S C10S C7S 64(13) 3_766 . . . ?
C16S C5S C10S C7S 1(13) 3_766 . . . ?
C2S C5S C10S C7S -44(13) . . . . ?
C7S C5S C10S C18S -76(15) . . . 3_766 ?
C3S C5S C10S C18S -152(16) . . . 3_766 ?
C12S C5S C10S C18S -3(16) . . . 3_766 ?
C1S C5S C10S C18S -5(11) . . . 3_766 ?
C17S C5S C10S C18S -55(11) . . . 3_766 ?
C11S C5S C10S C18S -18(10) 3_766 . . 3_766 ?
C4S C5S C10S C18S -131(13) . . . 3_766 ?
C6S C5S C10S C18S -12(13) 3_766 . . 3_766 ?
C16S C5S C10S C18S -75(13) 3_766 . . 3_766 ?
C2S C5S C10S C18S -120(13) . . . 3_766 ?
C7S C5S C10S C16S -1(13) . . . 3_766 ?
C18S C5S C10S C16S 75(13) 3_766 . . 3_766 ?
C3S C5S C10S C16S -77(7) . . . 3_766 ?
C12S C5S C10S C16S 72(12) . . . 3_766 ?
C1S C5S C10S C16S 70(6) . . . 3_766 ?
C17S C5S C10S C16S 20(9) . . . 3_766 ?
C11S C5S C10S C16S 57(8) 3_766 . . 3_766 ?
C4S C5S C10S C16S -56(4) . . . 3_766 ?
C6S C5S C10S C16S 63(5) 3_766 . . 3_766 ?
C2S C5S C10S C16S -45(4) . . . 3_766 ?
C7S C5S C10S C6S -64(13) . . . 3_766 ?
C18S C5S C10S C6S 12(13) 3_766 . . 3_766 ?
C3S C5S C10S C6S -140(8) . . . 3_766 ?
C12S C5S C10S C6S 9(11) . . . 3_766 ?
C1S C5S C10S C6S 7(5) . . . 3_766 ?
C17S C5S C10S C6S -43(8) . . . 3_766 ?
C11S C5S C10S C6S -6(8) 3_766 . . 3_766 ?
C4S C5S C10S C6S -119(4) . . . 3_766 ?
C16S C5S C10S C6S -63(5) 3_766 . . 3_766 ?
C2S C5S C10S C6S -108(5) . . . 3_766 ?
C7S C5S C10S C2S 44(13) . . . . ?
C18S C5S C10S C2S 120(13) 3_766 . . . ?
C3S C5S C10S C2S -32(6) . . . . ?
C12S C5S C10S C2S 117(12) . . . . ?
C1S C5S C10S C2S 115(5) . . . . ?
C17S C5S C10S C2S 65(8) . . . . ?
C11S C5S C10S C2S 102(7) 3_766 . . . ?
C4S C5S C10S C2S -11(3) . . . . ?
C6S C5S C10S C2S 108(5) 3_766 . . . ?
C16S C5S C10S C2S 45(4) 3_766 . . . ?
C7S C5S C10S C1S -71(12) . . . . ?
C18S C5S C10S C1S 5(11) 3_766 . . . ?
C3S C5S C10S C1S -147(9) . . . . ?
C12S C5S C10S C1S 2(11) . . . . ?
C17S C5S C10S C1S -50(6) . . . . ?
C11S C5S C10S C1S -13(5) 3_766 . . . ?
C4S C5S C10S C1S -126(5) . . . . ?
C6S C5S C10S C1S -7(5) 3_766 . . . ?
C16S C5S C10S C1S -70(6) 3_766 . . . ?
C2S C5S C10S C1S -115(5) . . . . ?
C7S C5S C10S C4S 55(12) . . . . ?
C18S C5S C10S C4S 131(13) 3_766 . . . ?
C3S C5S C10S C4S -21(6) . . . . ?
C12S C5S C10S C4S 128(12) . . . . ?
C1S C5S C10S C4S 126(5) . . . . ?
C17S C5S C10S C4S 76(7) . . . . ?
C11S C5S C10S C4S 113(7) 3_766 . . . ?
C6S C5S C10S C4S 119(4) 3_766 . . . ?
C16S C5S C10S C4S 56(4) 3_766 . . . ?
C2S C5S C10S C4S 11(3) . . . . ?
C7S C5S C10S C9S -33(14) . . . 3_766 ?
C18S C5S C10S C9S 43(14) 3_766 . . 3_766 ?
C3S C5S C10S C9S -109(7) . . . 3_766 ?
C12S C5S C10S C9S 39(11) . . . 3_766 ?
C1S C5S C10S C9S 37(6) . . . 3_766 ?
C17S C5S C10S C9S -12(10) . . . 3_766 ?
C11S C5S C10S C9S 24(9) 3_766 . . 3_766 ?
C4S C5S C10S C9S -88(5) . . . 3_766 ?
C6S C5S C10S C9S 31(4) 3_766 . . 3_766 ?
C16S C5S C10S C9S -32(4) 3_766 . . 3_766 ?
C2S C5S C10S C9S -77(5) . . . 3_766 ?
C5S C3S C10S C12S 24(11) . . . . ?
C4S C3S C10S C12S -107(14) . . . . ?
C7S C3S C10S C12S -11(12) . . . . ?
C2S C3S C10S C12S -109(11) . . . . ?
C18S C3S C10S C12S 10(10) 3_766 . . . ?
C14S C3S C10S C12S -68(12) . . . . ?
C16S C3S C10S C12S -68(10) 3_766 . . . ?
C13S C3S C10S C12S -92(11) . . . . ?
C17S C3S C10S C12S -19(11) . . . . ?
C8S C3S C10S C12S -96(12) 3_766 . . . ?
C4S C3S C10S C5S -131(13) . . . . ?
C7S C3S C10S C5S -35(9) . . . . ?
C2S C3S C10S C5S -133(9) . . . . ?
C18S C3S C10S C5S -14(8) 3_766 . . . ?
C14S C3S C10S C5S -92(9) . . . . ?
C12S C3S C10S C5S -24(11) . . . . ?
C16S C3S C10S C5S -92(7) 3_766 . . . ?
C13S C3S C10S C5S -117(8) . . . . ?
C17S C3S C10S C5S -43(7) . . . . ?
C8S C3S C10S C5S -121(11) 3_766 . . . ?
C5S C3S C10S C8S 121(11) . . . 3_766 ?
C4S C3S C10S C8S -10(16) . . . 3_766 ?
C7S C3S C10S C8S 86(12) . . . 3_766 ?
C2S C3S C10S C8S -13(11) . . . 3_766 ?
C18S C3S C10S C8S 107(10) 3_766 . . 3_766 ?
C14S C3S C10S C8S 28(12) . . . 3_766 ?
C12S C3S C10S C8S 96(12) . . . 3_766 ?
C16S C3S C10S C8S 28(8) 3_766 . . 3_766 ?
C13S C3S C10S C8S 4(10) . . . 3_766 ?
C17S C3S C10S C8S 78(10) . . . 3_766 ?
C5S C3S C10S C7S 35(9) . . . . ?
C4S C3S C10S C7S -96(10) . . . . ?
C2S C3S C10S C7S -99(7) . . . . ?
C18S C3S C10S C7S 21(8) 3_766 . . . ?
C14S C3S C10S C7S -58(6) . . . . ?
C12S C3S C10S C7S 11(12) . . . . ?
C16S C3S C10S C7S -58(7) 3_766 . . . ?
C13S C3S C10S C7S -82(7) . . . . ?
C17S C3S C10S C7S -8(6) . . . . ?
C8S C3S C10S C7S -86(12) 3_766 . . . ?
C5S C3S C10S C18S 14(8) . . . 3_766 ?
C4S C3S C10S C18S -117(11) . . . 3_766 ?
C7S C3S C10S C18S -21(8) . . . 3_766 ?
C2S C3S C10S C18S -120(7) . . . 3_766 ?
C14S C3S C10S C18S -79(7) . . . 3_766 ?
C12S C3S C10S C18S -10(10) . . . 3_766 ?
C16S C3S C10S C18S -79(6) 3_766 . . 3_766 ?
C13S C3S C10S C18S -103(6) . . . 3_766 ?
C17S C3S C10S C18S -29(5) . . . 3_766 ?
C8S C3S C10S C18S -107(10) 3_766 . . 3_766 ?
C5S C3S C10S C16S 92(7) . . . 3_766 ?
C4S C3S C10S C16S -38(10) . . . 3_766 ?
C7S C3S C10S C16S 58(7) . . . 3_766 ?
C2S C3S C10S C16S -41(5) . . . 3_766 ?
C18S C3S C10S C16S 79(6) 3_766 . . 3_766 ?
C14S C3S C10S C16S 0(7) . . . 3_766 ?
C12S C3S C10S C16S 68(10) . . . 3_766 ?
C13S C3S C10S C16S -24(5) . . . 3_766 ?
C17S C3S C10S C16S 50(5) . . . 3_766 ?
C8S C3S C10S C16S -28(8) 3_766 . . 3_766 ?
C5S C3S C10S C6S 44(9) . . . 3_766 ?
C4S C3S C10S C6S -87(14) . . . 3_766 ?
C7S C3S C10S C6S 9(11) . . . 3_766 ?
C2S C3S C10S C6S -89(10) . . . 3_766 ?
C18S C3S C10S C6S 30(7) 3_766 . . 3_766 ?
C14S C3S C10S C6S -49(11) . . . 3_766 ?
C12S C3S C10S C6S 20(8) . . . 3_766 ?
C16S C3S C10S C6S -49(7) 3_766 . . 3_766 ?
C13S C3S C10S C6S -73(9) . . . 3_766 ?
C17S C3S C10S C6S 1(9) . . . 3_766 ?
C8S C3S C10S C6S -77(9) 3_766 . . 3_766 ?
C5S C3S C10S C2S 133(9) . . . . ?
C4S C3S C10S C2S 2(7) . . . . ?
C7S C3S C10S C2S 99(7) . . . . ?
C18S C3S C10S C2S 120(7) 3_766 . . . ?
C14S C3S C10S C2S 41(4) . . . . ?
C12S C3S C10S C2S 109(11) . . . . ?
C16S C3S C10S C2S 41(5) 3_766 . . . ?
C13S C3S C10S C2S 17(3) . . . . ?
C17S C3S C10S C2S 91(4) . . . . ?
C8S C3S C10S C2S 13(11) 3_766 . . . ?
C5S C3S C10S C1S 26(7) . . . . ?
C4S C3S C10S C1S -105(11) . . . . ?
C7S C3S C10S C1S -8(9) . . . . ?
C2S C3S C10S C1S -107(6) . . . . ?
C18S C3S C10S C1S 13(5) 3_766 . . . ?
C14S C3S C10S C1S -66(8) . . . . ?
C12S C3S C10S C1S 2(8) . . . . ?
C16S C3S C10S C1S -66(5) 3_766 . . . ?
C13S C3S C10S C1S -90(6) . . . . ?
C17S C3S C10S C1S -16(6) . . . . ?
C8S C3S C10S C1S -94(9) 3_766 . . . ?
C5S C3S C10S C4S 131(13) . . . . ?
C7S C3S C10S C4S 96(10) . . . . ?
C2S C3S C10S C4S -2(7) . . . . ?
C18S C3S C10S C4S 117(11) 3_766 . . . ?
C14S C3S C10S C4S 39(7) . . . . ?
C12S C3S C10S C4S 107(15) . . . . ?
C16S C3S C10S C4S 38(10) 3_766 . . . ?
C13S C3S C10S C4S 14(7) . . . . ?
C17S C3S C10S C4S 88(9) . . . . ?
C8S C3S C10S C4S 10(16) 3_766 . . . ?
C5S C3S C10S C9S 85(8) . . . 3_766 ?
C4S C3S C10S C9S -46(14) . . . 3_766 ?
C7S C3S C10S C9S 50(10) . . . 3_766 ?
C2S C3S C10S C9S -49(8) . . . 3_766 ?
C18S C3S C10S C9S 71(6) 3_766 . . 3_766 ?
C14S C3S C10S C9S -8(10) . . . 3_766 ?
C12S C3S C10S C9S 60(9) . . . 3_766 ?
C16S C3S C10S C9S -8(6) 3_766 . . 3_766 ?
C13S C3S C10S C9S -32(8) . . . 3_766 ?
C17S C3S C10S C9S 42(8) . . . 3_766 ?
C8S C3S C10S C9S -36(6) 3_766 . . 3_766 ?
C5S C7S C10S C12S 86(16) . . . . ?
C18S C7S C10S C12S 25(12) 3_766 . . . ?
C17S C7S C10S C12S -41(19) . . . . ?
C3S C7S C10S C12S 166(16) . . . . ?
C1S C7S C10S C12S -3(10) . . . . ?
C11S C7S C10S C12S -1(13) 3_766 . . . ?
C16S C7S C10S C12S -93(12) 3_766 . . . ?
C14S C7S C10S C12S -121(12) . . . . ?
C4S C7S C10S C12S -162(12) . . . . ?
C6S C7S C10S C12S -23(10) 3_766 . . . ?
C18S C7S C10S C5S -61(13) 3_766 . . . ?
C17S C7S C10S C5S -127(22) . . . . ?
C3S C7S C10S C5S 79(15) . . . . ?
C12S C7S C10S C5S -86(16) . . . . ?
C1S C7S C10S C5S -89(13) . . . . ?
C11S C7S C10S C5S -87(15) 3_766 . . . ?
C16S C7S C10S C5S -179(16) 3_766 . . . ?
C14S C7S C10S C5S 153(16) . . . . ?
C4S C7S C10S C5S 112(14) . . . . ?
C6S C7S C10S C5S -109(14) 3_766 . . . ?
C5S C7S C10S C8S 169(16) . . . 3_766 ?
C18S C7S C10S C8S 108(11) 3_766 . . 3_766 ?
C17S C7S C10S C8S 42(19) . . . 3_766 ?
C3S C7S C10S C8S -111(12) . . . 3_766 ?
C12S C7S C10S C8S 83(13) . . . 3_766 ?
C1S C7S C10S C8S 80(8) . . . 3_766 ?
C11S C7S C10S C8S 82(11) 3_766 . . 3_766 ?
C16S C7S C10S C8S -10(8) 3_766 . . 3_766 ?
C14S C7S C10S C8S -38(9) . . . 3_766 ?
C4S C7S C10S C8S -79(8) . . . 3_766 ?
C6S C7S C10S C8S 60(7) 3_766 . . 3_766 ?
C5S C7S C10S C3S -79(15) . . . . ?
C18S C7S C10S C3S -140(14) 3_766 . . . ?
C17S C7S C10S C3S 153(20) . . . . ?
C12S C7S C10S C3S -166(16) . . . . ?
C1S C7S C10S C3S -169(11) . . . . ?
C11S C7S C10S C3S -166(13) 3_766 . . . ?
C16S C7S C10S C3S 102(10) 3_766 . . . ?
C14S C7S C10S C3S 74(9) . . . . ?
C4S C7S C10S C3S 32(7) . . . . ?
C6S C7S C10S C3S 171(11) 3_766 . . . ?
C5S C7S C10S C18S 61(14) . . . 3_766 ?
C17S C7S C10S C18S -66(14) . . . 3_766 ?
C3S C7S C10S C18S 140(14) . . . 3_766 ?
C12S C7S C10S C18S -25(12) . . . 3_766 ?
C1S C7S C10S C18S -29(7) . . . 3_766 ?
C11S C7S C10S C18S -26(8) 3_766 . . 3_766 ?
C16S C7S C10S C18S -118(11) 3_766 . . 3_766 ?
C14S C7S C10S C18S -146(12) . . . 3_766 ?
C4S C7S C10S C18S 173(11) . . . 3_766 ?
C6S C7S C10S C18S -49(8) 3_766 . . 3_766 ?
C5S C7S C10S C16S 179(16) . . . 3_766 ?
C18S C7S C10S C16S 118(11) 3_766 . . 3_766 ?
C17S C7S C10S C16S 52(16) . . . 3_766 ?
C3S C7S C10S C16S -102(10) . . . 3_766 ?
C12S C7S C10S C16S 93(12) . . . 3_766 ?
C1S C7S C10S C16S 89(7) . . . 3_766 ?
C11S C7S C10S C16S 92(9) 3_766 . . 3_766 ?
C14S C7S C10S C16S -28(5) . . . 3_766 ?
C4S C7S C10S C16S -69(5) . . . 3_766 ?
C6S C7S C10S C16S 70(6) 3_766 . . 3_766 ?
C5S C7S C10S C6S 109(14) . . . 3_766 ?
C18S C7S C10S C6S 49(8) 3_766 . . 3_766 ?
C17S C7S C10S C6S -18(16) . . . 3_766 ?
C3S C7S C10S C6S -171(11) . . . 3_766 ?
C12S C7S C10S C6S 23(9) . . . 3_766 ?
C1S C7S C10S C6S 20(4) . . . 3_766 ?
C11S C7S C10S C6S 23(8) 3_766 . . 3_766 ?
C16S C7S C10S C6S -70(6) 3_766 . . 3_766 ?
C14S C7S C10S C6S -98(7) . . . 3_766 ?
C4S C7S C10S C6S -139(6) . . . 3_766 ?
C5S C7S C10S C2S -131(14) . . . . ?
C18S C7S C10S C2S 168(11) 3_766 . . . ?
C17S C7S C10S C2S 102(16) . . . . ?
C3S C7S C10S C2S -52(8) . . . . ?
C12S C7S C10S C2S 143(12) . . . . ?
C1S C7S C10S C2S 140(6) . . . . ?
C11S C7S C10S C2S 142(9) 3_766 . . . ?
C16S C7S C10S C2S 50(5) 3_766 . . . ?
C14S C7S C10S C2S 22(5) . . . . ?
C4S C7S C10S C2S -19(2) . . . . ?
C6S C7S C10S C2S 120(5) 3_766 . . . ?
C5S C7S C10S C1S 89(13) . . . . ?
C18S C7S C10S C1S 29(7) 3_766 . . . ?
C17S C7S C10S C1S -38(14) . . . . ?
C3S C7S C10S C1S 169(11) . . . . ?
C12S C7S C10S C1S 3(10) . . . . ?
C11S C7S C10S C1S 3(6) 3_766 . . . ?
C16S C7S C10S C1S -89(7) 3_766 . . . ?
C14S C7S C10S C1S -117(8) . . . . ?
C4S C7S C10S C1S -159(7) . . . . ?
C6S C7S C10S C1S -20(4) 3_766 . . . ?
C5S C7S C10S C4S -112(14) . . . . ?
C18S C7S C10S C4S -173(11) 3_766 . . . ?
C17S C7S C10S C4S 121(18) . . . . ?
C3S C7S C10S C4S -32(7) . . . . ?
C12S C7S C10S C4S 162(12) . . . . ?
C1S C7S C10S C4S 159(7) . . . . ?
C11S C7S C10S C4S 161(10) 3_766 . . . ?
C16S C7S C10S C4S 69(5) 3_766 . . . ?
C14S C7S C10S C4S 41(4) . . . . ?
C6S C7S C10S C4S 139(6) 3_766 . . . ?
C5S C7S C10S C9S 147(14) . . . 3_766 ?
C18S C7S C10S C9S 86(9) 3_766 . . 3_766 ?
C17S C7S C10S C9S 20(16) . . . 3_766 ?
C3S C7S C10S C9S -134(10) . . . 3_766 ?
C12S C7S C10S C9S 61(10) . . . 3_766 ?
C1S C7S C10S C9S 57(5) . . . 3_766 ?
C11S C7S C10S C9S 60(8) 3_766 . . 3_766 ?
C16S C7S C10S C9S -32(5) 3_766 . . 3_766 ?
C14S C7S C10S C9S -60(6) . . . 3_766 ?
C4S C7S C10S C9S -101(5) . . . 3_766 ?
C6S C7S C10S C9S 37(3) 3_766 . . 3_766 ?
C13S C2S C10S C12S -38(15) . . . . ?
C4S C2S C10S C12S 77(12) . . . . ?
C9S C2S C10S C12S -104(12) . . . . ?
C14S C2S C10S C12S -1(12) . . . . ?
C16S C2S C10S C12S -37(10) 3_766 . . . ?
C3S C2S C10S C12S 79(11) . . . . ?
C8S C2S C10S C12S -51(13) . . . . ?
C8S C2S C10S C12S -88(12) 3_766 . . . ?
C16S C2S C10S C12S -87(12) . . . . ?
C15S C2S C10S C12S -130(10) . . . . ?
C7S C2S C10S C12S 28(9) . . . . ?
C13S C2S C10S C5S -85(11) . . . . ?
C4S C2S C10S C5S 29(8) . . . . ?
C9S C2S C10S C5S -152(7) . . . . ?
C14S C2S C10S C5S -49(8) . . . . ?
C16S C2S C10S C5S -84(7) 3_766 . . . ?
C3S C2S C10S C5S 32(7) . . . . ?
C8S C2S C10S C5S -98(9) . . . . ?
C8S C2S C10S C5S -135(9) 3_766 . . . ?
C16S C2S C10S C5S -135(7) . . . . ?
C15S C2S C10S C5S -177(5) . . . . ?
C7S C2S C10S C5S -19(6) . . . . ?
C13S C2S C10S C8S 50(11) . . . 3_766 ?
C4S C2S C10S C8S 165(8) . . . 3_766 ?
C9S C2S C10S C8S -16(8) . . . 3_766 ?
C14S C2S C10S C8S 87(7) . . . 3_766 ?
C16S C2S C10S C8S 52(6) 3_766 . . 3_766 ?
C3S C2S C10S C8S 168(10) . . . 3_766 ?
C8S C2S C10S C8S 37(11) . . . 3_766 ?
C16S C2S C10S C8S 1(7) . . . 3_766 ?
C15S C2S C10S C8S -41(7) . . . 3_766 ?
C7S C2S C10S C8S 117(8) . . . 3_766 ?
C13S C2S C10S C3S -118(11) . . . . ?
C4S C2S C10S C3S -3(8) . . . . ?
C9S C2S C10S C3S 176(9) . . . . ?
C14S C2S C10S C3S -81(8) . . . . ?
C16S C2S C10S C3S -116(8) 3_766 . . . ?
C8S C2S C10S C3S -131(9) . . . . ?
C8S C2S C10S C3S -168(10) 3_766 . . . ?
C16S C2S C10S C3S -167(8) . . . . ?
C15S C2S C10S C3S 151(7) . . . . ?
C7S C2S C10S C3S -51(7) . . . . ?
C13S C2S C10S C7S -67(11) . . . . ?
C4S C2S C10S C7S 48(7) . . . . ?
C9S C2S C10S C7S -133(7) . . . . ?
C14S C2S C10S C7S -30(7) . . . . ?
C16S C2S C10S C7S -65(6) 3_766 . . . ?
C3S C2S C10S C7S 51(7) . . . . ?
C8S C2S C10S C7S -80(8) . . . . ?
C8S C2S C10S C7S -117(8) 3_766 . . . ?
C16S C2S C10S C7S -116(7) . . . . ?
C15S C2S C10S C7S -158(5) . . . . ?
C13S C2S C10S C18S -60(12) . . . 3_766 ?
C4S C2S C10S C18S 55(8) . . . 3_766 ?
C9S C2S C10S C18S -126(8) . . . 3_766 ?
C14S C2S C10S C18S -23(8) . . . 3_766 ?
C16S C2S C10S C18S -59(6) 3_766 . . 3_766 ?
C3S C2S C10S C18S 58(8) . . . 3_766 ?
C8S C2S C10S C18S -73(9) . . . 3_766 ?
C8S C2S C10S C18S -110(9) 3_766 . . 3_766 ?
C16S C2S C10S C18S -109(7) . . . 3_766 ?
C15S C2S C10S C18S -152(5) . . . 3_766 ?
C7S C2S C10S C18S 6(6) . . . 3_766 ?
C13S C2S C10S C16S -1(10) . . . 3_766 ?
C4S C2S C10S C16S 113(7) . . . 3_766 ?
C9S C2S C10S C16S -68(6) . . . 3_766 ?
C14S C2S C10S C16S 35(5) . . . 3_766 ?
C3S C2S C10S C16S 116(8) . . . 3_766 ?
C8S C2S C10S C16S -14(8) . . . 3_766 ?
C8S C2S C10S C16S -52(6) 3_766 . . 3_766 ?
C16S C2S C10S C16S -51(7) . . . 3_766 ?
C15S C2S C10S C16S -93(5) . . . 3_766 ?
C7S C2S C10S C16S 65(6) . . . 3_766 ?
C13S C2S C10S C6S -9(12) . . . 3_766 ?
C4S C2S C10S C6S 106(7) . . . 3_766 ?
C9S C2S C10S C6S -75(8) . . . 3_766 ?
C14S C2S C10S C6S 28(7) . . . 3_766 ?
C16S C2S C10S C6S -8(5) 3_766 . . 3_766 ?
C3S C2S C10S C6S 108(8) . . . 3_766 ?
C8S C2S C10S C6S -22(9) . . . 3_766 ?
C8S C2S C10S C6S -59(7) 3_766 . . 3_766 ?
C16S C2S C10S C6S -58(6) . . . 3_766 ?
C15S C2S C10S C6S -101(5) . . . 3_766 ?
C7S C2S C10S C6S 57(5) . . . 3_766 ?
C13S C2S C10S C1S -36(12) . . . . ?
C4S C2S C10S C1S 79(7) . . . . ?
C9S C2S C10S C1S -102(8) . . . . ?
C14S C2S C10S C1S 1(7) . . . . ?
C16S C2S C10S C1S -34(6) 3_766 . . . ?
C3S C2S C10S C1S 82(8) . . . . ?
C8S C2S C10S C1S -49(9) . . . . ?
C8S C2S C10S C1S -86(8) 3_766 . . . ?
C16S C2S C10S C1S -85(7) . . . . ?
C15S C2S C10S C1S -127(5) . . . . ?
C7S C2S C10S C1S 31(5) . . . . ?
C13S C2S C10S C4S -115(12) . . . . ?
C9S C2S C10S C4S 179(9) . . . . ?
C14S C2S C10S C4S -78(7) . . . . ?
C16S C2S C10S C4S -113(7) 3_766 . . . ?
C3S C2S C10S C4S 3(8) . . . . ?
C8S C2S C10S C4S -128(9) . . . . ?
C8S C2S C10S C4S -165(8) 3_766 . . . ?
C16S C2S C10S C4S -164(6) . . . . ?
C15S C2S C10S C4S 154(6) . . . . ?
C7S C2S C10S C4S -48(7) . . . . ?
C13S C2S C10S C9S 17(10) . . . 3_766 ?
C4S C2S C10S C9S 132(6) . . . 3_766 ?
C9S C2S C10S C9S -49(6) . . . 3_766 ?
C14S C2S C10S C9S 54(5) . . . 3_766 ?
C16S C2S C10S C9S 18(4) 3_766 . . 3_766 ?
C3S C2S C10S C9S 134(7) . . . 3_766 ?
C8S C2S C10S C9S 4(7) . . . 3_766 ?
C8S C2S C10S C9S -33(5) 3_766 . . 3_766 ?
C16S C2S C10S C9S -32(4) . . . 3_766 ?
C15S C2S C10S C9S -75(3) . . . 3_766 ?
C7S C2S C10S C9S 83(5) . . . 3_766 ?
C18S C1S C10S C12S 30(100) 3_766 . . . ?
C6S C1S C10S C12S -160(100) 3_766 . . . ?
C11S C1S C10S C12S 64(100) 3_766 . . . ?
C15S C1S C10S C12S 168(100) 3_766 . . . ?
C7S C1S C10S C12S 68(100) . . . . ?
C5S C1S C10S C12S 36(100) . . . . ?
C17S C1S C10S C12S 84(100) . . . . ?
C9S C1S C10S C12S 172(100) 3_766 . . . ?
C16S C1S C10S C12S 132(100) 3_766 . . . ?
C3S C1S C10S C12S 60(100) . . . . ?
C18S C1S C10S C5S -6(13) 3_766 . . . ?
C6S C1S C10S C5S 164(11) 3_766 . . . ?
C12S C1S C10S C5S -36(100) . . . . ?
C11S C1S C10S C5S 27(11) 3_766 . . . ?
C15S C1S C10S C5S 132(9) 3_766 . . . ?
C7S C1S C10S C5S 32(7) . . . . ?
C17S C1S C10S C5S 47(8) . . . . ?
C9S C1S C10S C5S 136(8) 3_766 . . . ?
C16S C1S C10S C5S 95(7) 3_766 . . . ?
C3S C1S C10S C5S 24(7) . . . . ?
C18S C1S C10S C8S -145(14) 3_766 . . 3_766 ?
C6S C1S C10S C8S 25(9) 3_766 . . 3_766 ?
C12S C1S C10S C8S -176(100) . . . 3_766 ?
C11S C1S C10S C8S -112(11) 3_766 . . 3_766 ?
C15S C1S C10S C8S -8(9) 3_766 . . 3_766 ?
C7S C1S C10S C8S -108(9) . . . 3_766 ?
C5S C1S C10S C8S -139(10) . . . 3_766 ?
C17S C1S C10S C8S -92(8) . . . 3_766 ?
C9S C1S C10S C8S -4(6) 3_766 . . 3_766 ?
C16S C1S C10S C8S -44(6) 3_766 . . 3_766 ?
C3S C1S C10S C8S -116(10) . . . 3_766 ?
C18S C1S C10S C3S -30(13) 3_766 . . . ?
C6S C1S C10S C3S 140(10) 3_766 . . . ?
C12S C1S C10S C3S -60(100) . . . . ?
C11S C1S C10S C3S 4(13) 3_766 . . . ?
C15S C1S C10S C3S 108(9) 3_766 . . . ?
C7S C1S C10S C3S 8(8) . . . . ?
C5S C1S C10S C3S -24(7) . . . . ?
C17S C1S C10S C3S 23(9) . . . . ?
C9S C1S C10S C3S 112(8) 3_766 . . . ?
C16S C1S C10S C3S 71(7) 3_766 . . . ?
C18S C1S C10S C7S -38(12) 3_766 . . . ?
C6S C1S C10S C7S 132(10) 3_766 . . . ?
C12S C1S C10S C7S -68(100) . . . . ?
C11S C1S C10S C7S -4(11) 3_766 . . . ?
C15S C1S C10S C7S 100(9) 3_766 . . . ?
C5S C1S C10S C7S -32(7) . . . . ?
C17S C1S C10S C7S 15(7) . . . . ?
C9S C1S C10S C7S 104(7) 3_766 . . . ?
C16S C1S C10S C7S 63(6) 3_766 . . . ?
C3S C1S C10S C7S -8(8) . . . . ?
C6S C1S C10S C18S 170(16) 3_766 . . 3_766 ?
C12S C1S C10S C18S -30(100) . . . 3_766 ?
C11S C1S C10S C18S 33(13) 3_766 . . 3_766 ?
C15S C1S C10S C18S 138(14) 3_766 . . 3_766 ?
C7S C1S C10S C18S 38(12) . . . 3_766 ?
C5S C1S C10S C18S 6(13) . . . 3_766 ?
C17S C1S C10S C18S 53(11) . . . 3_766 ?
C9S C1S C10S C18S 142(13) 3_766 . . 3_766 ?
C16S C1S C10S C18S 101(13) 3_766 . . 3_766 ?
C3S C1S C10S C18S 30(13) . . . 3_766 ?
C18S C1S C10S C16S -101(12) 3_766 . . 3_766 ?
C6S C1S C10S C16S 69(8) 3_766 . . 3_766 ?
C12S C1S C10S C16S -132(100) . . . 3_766 ?
C11S C1S C10S C16S -68(10) 3_766 . . 3_766 ?
C15S C1S C10S C16S 37(7) 3_766 . . 3_766 ?
C7S C1S C10S C16S -63(6) . . . 3_766 ?
C5S C1S C10S C16S -95(7) . . . 3_766 ?
C17S C1S C10S C16S -48(6) . . . 3_766 ?
C9S C1S C10S C16S 40(4) 3_766 . . 3_766 ?
C3S C1S C10S C16S -71(7) . . . 3_766 ?
C18S C1S C10S C6S -170(15) 3_766 . . 3_766 ?
C12S C1S C10S C6S 160(100) . . . 3_766 ?
C11S C1S C10S C6S -137(14) 3_766 . . 3_766 ?
C15S C1S C10S C6S -32(7) 3_766 . . 3_766 ?
C7S C1S C10S C6S -132(10) . . . 3_766 ?
C5S C1S C10S C6S -164(11) . . . 3_766 ?
C17S C1S C10S C6S -117(10) . . . 3_766 ?
C9S C1S C10S C6S -28(7) 3_766 . . 3_766 ?
C16S C1S C10S C6S -69(8) 3_766 . . 3_766 ?
C3S C1S C10S C6S -140(10) . . . 3_766 ?
C18S C1S C10S C2S -76(13) 3_766 . . . ?
C6S C1S C10S C2S 94(9) 3_766 . . . ?
C12S C1S C10S C2S -106(100) . . . . ?
C11S C1S C10S C2S -43(12) 3_766 . . . ?
C15S C1S C10S C2S 62(8) 3_766 . . . ?
C7S C1S C10S C2S -38(6) . . . . ?
C5S C1S C10S C2S -70(7) . . . . ?
C17S C1S C10S C2S -23(7) . . . . ?
C9S C1S C10S C2S 66(6) 3_766 . . . ?
C16S C1S C10S C2S 25(4) 3_766 . . . ?
C3S C1S C10S C2S -46(5) . . . . ?
C18S C1S C10S C4S -55(12) 3_766 . . . ?
C6S C1S C10S C4S 115(8) 3_766 . . . ?
C12S C1S C10S C4S -85(100) . . . . ?
C11S C1S C10S C4S -22(12) 3_766 . . . ?
C15S C1S C10S C4S 83(8) 3_766 . . . ?
C7S C1S C10S C4S -17(6) . . . . ?
C5S C1S C10S C4S -49(6) . . . . ?
C17S C1S C10S C4S -2(7) . . . . ?
C9S C1S C10S C4S 87(5) 3_766 . . . ?
C16S C1S C10S C4S 46(4) 3_766 . . . ?
C3S C1S C10S C4S -25(5) . . . . ?
C18S C1S C10S C9S -142(13) 3_766 . . 3_766 ?
C6S C1S C10S C9S 28(7) 3_766 . . 3_766 ?
C12S C1S C10S C9S -172(100) . . . 3_766 ?
C11S C1S C10S C9S -108(10) 3_766 . . 3_766 ?
C15S C1S C10S C9S -4(6) 3_766 . . 3_766 ?
C7S C1S C10S C9S -104(7) . . . 3_766 ?
C5S C1S C10S C9S -136(8) . . . 3_766 ?
C17S C1S C10S C9S -88(6) . . . 3_766 ?
C16S C1S C10S C9S -40(4) 3_766 . . 3_766 ?
C3S C1S C10S C9S -112(8) . . . 3_766 ?
C2S C4S C10S C12S -108(12) . . . . ?
C3S C4S C10S C12S 76(14) . . . . ?
C14S C4S C10S C12S -42(11) . . . . ?
C13S C4S C10S C12S -80(11) . . . . ?
C9S C4S C10S C12S -109(11) . . . . ?
C7S C4S C10S C12S 14(9) . . . . ?
C16S C4S C10S C12S -57(10) 3_766 . . . ?
C5S C4S C10S C12S 39(8) . . . . ?
C8S C4S C10S C12S -72(11) . . . . ?
C17S C4S C10S C12S -1(10) . . . . ?
C8S C4S C10S C12S -94(12) 3_766 . . . ?
C2S C4S C10S C5S -148(8) . . . . ?
C3S C4S C10S C5S 37(11) . . . . ?
C14S C4S C10S C5S -81(7) . . . . ?
C13S C4S C10S C5S -119(7) . . . . ?
C9S C4S C10S C5S -148(7) . . . . ?
C7S C4S C10S C5S -26(7) . . . . ?
C16S C4S C10S C5S -96(7) 3_766 . . . ?
C8S C4S C10S C5S -111(7) . . . . ?
C17S C4S C10S C5S -41(6) . . . . ?
C8S C4S C10S C5S -134(9) 3_766 . . . ?
C2S C4S C10S C8S -14(7) . . . 3_766 ?
C3S C4S C10S C8S 171(14) . . . 3_766 ?
C14S C4S C10S C8S 53(7) . . . 3_766 ?
C13S C4S C10S C8S 14(7) . . . 3_766 ?
C9S C4S C10S C8S -15(6) . . . 3_766 ?
C7S C4S C10S C8S 108(8) . . . 3_766 ?
C16S C4S C10S C8S 37(6) 3_766 . . 3_766 ?
C5S C4S C10S C8S 134(9) . . . 3_766 ?
C8S C4S C10S C8S 22(9) . . . 3_766 ?
C17S C4S C10S C8S 93(7) . . . 3_766 ?
C2S C4S C10S C3S 175(14) . . . . ?
C14S C4S C10S C3S -118(12) . . . . ?
C13S C4S C10S C3S -157(12) . . . . ?
C9S C4S C10S C3S 175(12) . . . . ?
C7S C4S C10S C3S -63(11) . . . . ?
C16S C4S C10S C3S -133(13) 3_766 . . . ?
C5S C4S C10S C3S -37(11) . . . . ?
C8S C4S C10S C3S -149(12) . . . . ?
C17S C4S C10S C3S -78(11) . . . . ?
C8S C4S C10S C3S -171(14) 3_766 . . . ?
C2S C4S C10S C7S -122(8) . . . . ?
C3S C4S C10S C7S 63(11) . . . . ?
C14S C4S C10S C7S -55(7) . . . . ?
C13S C4S C10S C7S -94(7) . . . . ?
C9S C4S C10S C7S -123(6) . . . . ?
C16S C4S C10S C7S -71(6) 3_766 . . . ?
C5S C4S C10S C7S 26(7) . . . . ?
C8S C4S C10S C7S -86(7) . . . . ?
C17S C4S C10S C7S -15(6) . . . . ?
C8S C4S C10S C7S -108(8) 3_766 . . . ?
C2S C4S C10S C18S -126(8) . . . 3_766 ?
C3S C4S C10S C18S 59(12) . . . 3_766 ?
C14S C4S C10S C18S -59(7) . . . 3_766 ?
C13S C4S C10S C18S -98(6) . . . 3_766 ?
C9S C4S C10S C18S -127(6) . . . 3_766 ?
C7S C4S C10S C18S -4(6) . . . 3_766 ?
C16S C4S C10S C18S -75(6) 3_766 . . 3_766 ?
C5S C4S C10S C18S 22(6) . . . 3_766 ?
C8S C4S C10S C18S -90(6) . . . 3_766 ?
C17S C4S C10S C18S -19(5) . . . 3_766 ?
C8S C4S C10S C18S -112(8) 3_766 . . 3_766 ?
C2S C4S C10S C16S -51(6) . . . 3_766 ?
C3S C4S C10S C16S 133(13) . . . 3_766 ?
C14S C4S C10S C16S 15(6) . . . 3_766 ?
C13S C4S C10S C16S -23(5) . . . 3_766 ?
C9S C4S C10S C16S -52(5) . . . 3_766 ?
C7S C4S C10S C16S 71(6) . . . 3_766 ?
C5S C4S C10S C16S 96(7) . . . 3_766 ?
C8S C4S C10S C16S -15(6) . . . 3_766 ?
C17S C4S C10S C16S 56(5) . . . 3_766 ?
C8S C4S C10S C16S -37(6) 3_766 . . 3_766 ?
C2S C4S C10S C6S -81(8) . . . 3_766 ?
C3S C4S C10S C6S 104(13) . . . 3_766 ?
C14S C4S C10S C6S -15(7) . . . 3_766 ?
C13S C4S C10S C6S -53(7) . . . 3_766 ?
C9S C4S C10S C6S -82(7) . . . 3_766 ?
C7S C4S C10S C6S 41(6) . . . 3_766 ?
C16S C4S C10S C6S -30(5) 3_766 . . 3_766 ?
C5S C4S C10S C6S 66(6) . . . 3_766 ?
C8S C4S C10S C6S -45(7) . . . 3_766 ?
C17S C4S C10S C6S 26(6) . . . 3_766 ?
C8S C4S C10S C6S -67(7) 3_766 . . 3_766 ?
C3S C4S C10S C2S -175(14) . . . . ?
C14S C4S C10S C2S 67(6) . . . . ?
C13S C4S C10S C2S 28(5) . . . . ?
C9S C4S C10S C2S 0(4) . . . . ?
C7S C4S C10S C2S 122(8) . . . . ?
C16S C4S C10S C2S 51(6) 3_766 . . . ?
C5S C4S C10S C2S 148(8) . . . . ?
C8S C4S C10S C2S 36(6) . . . . ?
C17S C4S C10S C2S 107(6) . . . . ?
C8S C4S C10S C2S 14(7) 3_766 . . . ?
C2S C4S C10S C1S -106(7) . . . . ?
C3S C4S C10S C1S 79(12) . . . . ?
C14S C4S C10S C1S -39(7) . . . . ?
C13S C4S C10S C1S -78(6) . . . . ?
C9S C4S C10S C1S -106(6) . . . . ?
C7S C4S C10S C1S 16(6) . . . . ?
C16S C4S C10S C1S -54(5) 3_766 . . . ?
C5S C4S C10S C1S 42(5) . . . . ?
C8S C4S C10S C1S -70(6) . . . . ?
C17S C4S C10S C1S 1(5) . . . . ?
C8S C4S C10S C1S -92(7) 3_766 . . . ?
C2S C4S C10S C9S -47(6) . . . 3_766 ?
C3S C4S C10S C9S 138(12) . . . 3_766 ?
C14S C4S C10S C9S 19(5) . . . 3_766 ?
C13S C4S C10S C9S -19(5) . . . 3_766 ?
C9S C4S C10S C9S -48(4) . . . 3_766 ?
C7S C4S C10S C9S 75(6) . . . 3_766 ?
C16S C4S C10S C9S 4(4) 3_766 . . 3_766 ?
C5S C4S C10S C9S 100(6) . . . 3_766 ?
C8S C4S C10S C9S -11(5) . . . 3_766 ?
C17S C4S C10S C9S 60(4) . . . 3_766 ?
C8S C4S C10S C9S -33(5) 3_766 . . 3_766 ?
C15S C6S C11S C1S -169(19) . . . 3_766 ?
C12S C6S C11S C1S 53(17) 3_766 . . 3_766 ?
C9S C6S C11S C1S 153(17) . . . 3_766 ?
C18S C6S C11S C1S 41(15) . . . 3_766 ?
C10S C6S C11S C1S 60(16) 3_766 . . 3_766 ?
C16S C6S C11S C1S 117(17) . . . 3_766 ?
C8S C6S C11S C1S 98(17) . . . 3_766 ?
C13S C6S C11S C1S 137(17) . . . 3_766 ?
C7S C6S C11S C1S 80(17) 3_766 . . 3_766 ?
C5S C6S C11S C1S 56(16) 3_766 . . 3_766 ?
C15S C6S C11S C17S 71(9) . . . 3_766 ?
C1S C6S C11S C17S -119(21) 3_766 . . 3_766 ?
C12S C6S C11S C17S -66(12) 3_766 . . 3_766 ?
C9S C6S C11S C17S 34(12) . . . 3_766 ?
C18S C6S C11S C17S -78(13) . . . 3_766 ?
C10S C6S C11S C17S -59(10) 3_766 . . 3_766 ?
C16S C6S C11S C17S -2(9) . . . 3_766 ?
C8S C6S C11S C17S -21(12) . . . 3_766 ?
C13S C6S C11S C17S 18(14) . . . 3_766 ?
C7S C6S C11S C17S -39(9) 3_766 . . 3_766 ?
C5S C6S C11S C17S -63(9) 3_766 . . 3_766 ?
C15S C6S C11S C18S 150(11) . . . . ?
C1S C6S C11S C18S -41(14) 3_766 . . . ?
C12S C6S C11S C18S 12(11) 3_766 . . . ?
C9S C6S C11S C18S 112(9) . . . . ?
C10S C6S C11S C18S 19(9) 3_766 . . . ?
C16S C6S C11S C18S 76(9) . . . . ?
C8S C6S C11S C18S 57(9) . . . . ?
C13S C6S C11S C18S 96(9) . . . . ?
C7S C6S C11S C18S 39(9) 3_766 . . . ?
C5S C6S C11S C18S 15(8) 3_766 . . . ?
C15S C6S C11S C7S 110(8) . . . 3_766 ?
C1S C6S C11S C7S -80(17) 3_766 . . 3_766 ?
C12S C6S C11S C7S -27(9) 3_766 . . 3_766 ?
C9S C6S C11S C7S 73(7) . . . 3_766 ?
C18S C6S C11S C7S -39(9) . . . 3_766 ?
C10S C6S C11S C7S -20(7) 3_766 . . 3_766 ?
C16S C6S C11S C7S 37(6) . . . 3_766 ?
C8S C6S C11S C7S 18(8) . . . 3_766 ?
C13S C6S C11S C7S 57(9) . . . 3_766 ?
C5S C6S C11S C7S -24(5) 3_766 . . 3_766 ?
C1S C6S C11S C15S 169(19) 3_766 . . . ?
C12S C6S C11S C15S -137(10) 3_766 . . . ?
C9S C6S C11S C15S -37(6) . . . . ?
C18S C6S C11S C15S -150(11) . . . . ?
C10S C6S C11S C15S -130(8) 3_766 . . . ?
C16S C6S C11S C15S -73(6) . . . . ?
C8S C6S C11S C15S -92(8) . . . . ?
C13S C6S C11S C15S -53(9) . . . . ?
C7S C6S C11S C15S -110(8) 3_766 . . . ?
C5S C6S C11S C15S -134(7) 3_766 . . . ?
C15S C6S C11S C12S 137(10) . . . 3_766 ?
C1S C6S C11S C12S -53(17) 3_766 . . 3_766 ?
C9S C6S C11S C12S 100(9) . . . 3_766 ?
C18S C6S C11S C12S -12(11) . . . 3_766 ?
C10S C6S C11S C12S 7(8) 3_766 . . 3_766 ?
C16S C6S C11S C12S 64(8) . . . 3_766 ?
C8S C6S C11S C12S 45(8) . . . 3_766 ?
C13S C6S C11S C12S 84(10) . . . 3_766 ?
C7S C6S C11S C12S 27(9) 3_766 . . 3_766 ?
C5S C6S C11S C12S 3(8) 3_766 . . 3_766 ?
C15S C6S C11S C5S 134(7) . . . 3_766 ?
C1S C6S C11S C5S -56(16) 3_766 . . 3_766 ?
C12S C6S C11S C5S -3(8) 3_766 . . 3_766 ?
C9S C6S C11S C5S 97(6) . . . 3_766 ?
C18S C6S C11S C5S -15(8) . . . 3_766 ?
C10S C6S C11S C5S 4(5) 3_766 . . 3_766 ?
C16S C6S C11S C5S 61(4) . . . 3_766 ?
C8S C6S C11S C5S 42(6) . . . 3_766 ?
C13S C6S C11S C5S 81(7) . . . 3_766 ?
C7S C6S C11S C5S 24(5) 3_766 . . 3_766 ?
C15S C6S C11S C16S 73(6) . . . . ?
C1S C6S C11S C16S -117(17) 3_766 . . . ?
C12S C6S C11S C16S -64(8) 3_766 . . . ?
C9S C6S C11S C16S 36(5) . . . . ?
C18S C6S C11S C16S -76(9) . . . . ?
C10S C6S C11S C16S -57(4) 3_766 . . . ?
C8S C6S C11S C16S -19(5) . . . . ?
C13S C6S C11S C16S 20(7) . . . . ?
C7S C6S C11S C16S -37(6) 3_766 . . . ?
C5S C6S C11S C16S -61(4) 3_766 . . . ?
C18S C1S C12S C10S -149(100) 3_766 . . . ?
C6S C1S C12S C10S 20(100) 3_766 . . . ?
C11S C1S C12S C10S -118(100) 3_766 . . . ?
C15S C1S C12S C10S -12(100) 3_766 . . . ?
C7S C1S C12S C10S -111(100) . . . . ?
C5S C1S C12S C10S -142(100) . . . . ?
C17S C1S C12S C10S -97(100) . . . . ?
C9S C1S C12S C10S -8(100) 3_766 . . . ?
C16S C1S C12S C10S -47(100) 3_766 . . . ?
C3S C1S C12S C10S -117(100) . . . . ?
C6S C1S C12S C18S 169(16) 3_766 . . 3_766 ?
C11S C1S C12S C18S 32(15) 3_766 . . 3_766 ?
C15S C1S C12S C18S 137(14) 3_766 . . 3_766 ?
C7S C1S C12S C18S 38(13) . . . 3_766 ?
C5S C1S C12S C18S 7(13) . . . 3_766 ?
C17S C1S C12S C18S 53(12) . . . 3_766 ?
C10S C1S C12S C18S 149(100) . . . 3_766 ?
C9S C1S C12S C18S 141(14) 3_766 . . 3_766 ?
C16S C1S C12S C18S 102(14) 3_766 . . 3_766 ?
C3S C1S C12S C18S 32(14) . . . 3_766 ?
C18S C1S C12S C6S -169(16) 3_766 . . 3_766 ?
C11S C1S C12S C6S -138(14) 3_766 . . 3_766 ?
C15S C1S C12S C6S -32(8) 3_766 . . 3_766 ?
C7S C1S C12S C6S -131(10) . . . 3_766 ?
C5S C1S C12S C6S -162(13) . . . 3_766 ?
C17S C1S C12S C6S -117(10) . . . 3_766 ?
C10S C1S C12S C6S -20(100) . . . 3_766 ?
C9S C1S C12S C6S -28(6) 3_766 . . 3_766 ?
C16S C1S C12S C6S -68(7) 3_766 . . 3_766 ?
C3S C1S C12S C6S -137(12) . . . 3_766 ?
C18S C1S C12S C5S -7(13) 3_766 . . . ?
C6S C1S C12S C5S 162(13) 3_766 . . . ?
C11S C1S C12S C5S 25(16) 3_766 . . . ?
C15S C1S C12S C5S 130(10) 3_766 . . . ?
C7S C1S C12S C5S 31(9) . . . . ?
C17S C1S C12S C5S 46(11) . . . . ?
C10S C1S C12S C5S 142(100) . . . . ?
C9S C1S C12S C5S 134(11) 3_766 . . . ?
C16S C1S C12S C5S 95(12) 3_766 . . . ?
C3S C1S C12S C5S 25(8) . . . . ?
C18S C1S C12S C7S -38(13) 3_766 . . . ?
C6S C1S C12S C7S 131(10) 3_766 . . . ?
C11S C1S C12S C7S -7(13) 3_766 . . . ?
C15S C1S C12S C7S 99(9) 3_766 . . . ?
C5S C1S C12S C7S -31(9) . . . . ?
C17S C1S C12S C7S 14(8) . . . . ?
C10S C1S C12S C7S 111(100) . . . . ?
C9S C1S C12S C7S 103(7) 3_766 . . . ?
C16S C1S C12S C7S 63(7) 3_766 . . . ?
C3S C1S C12S C7S -7(10) . . . . ?
C18S C1S C12S C11S -32(15) 3_766 . . 3_766 ?
C6S C1S C12S C11S 138(14) 3_766 . . 3_766 ?
C15S C1S C12S C11S 106(13) 3_766 . . 3_766 ?
C7S C1S C12S C11S 7(13) . . . 3_766 ?
C5S C1S C12S C11S -25(16) . . . 3_766 ?
C17S C1S C12S C11S 21(9) . . . 3_766 ?
C10S C1S C12S C11S 118(100) . . . 3_766 ?
C9S C1S C12S C11S 110(11) 3_766 . . 3_766 ?
C16S C1S C12S C11S 70(12) 3_766 . . 3_766 ?
C3S C1S C12S C11S 0(19) . . . 3_766 ?
C18S C1S C12S C8S -145(18) 3_766 . . 3_766 ?
C6S C1S C12S C8S 24(11) 3_766 . . 3_766 ?
C11S C1S C12S C8S -113(13) 3_766 . . 3_766 ?
C15S C1S C12S C8S -8(14) 3_766 . . 3_766 ?
C7S C1S C12S C8S -107(13) . . . 3_766 ?
C5S C1S C12S C8S -138(18) . . . 3_766 ?
C17S C1S C12S C8S -92(12) . . . 3_766 ?
C10S C1S C12S C8S 4(100) . . . 3_766 ?
C9S C1S C12S C8S -4(9) 3_766 . . 3_766 ?
C16S C1S C12S C8S -43(8) 3_766 . . 3_766 ?
C3S C1S C12S C8S -113(18) . . . 3_766 ?
C18S C1S C12S C15S -137(14) 3_766 . . 3_766 ?
C6S C1S C12S C15S 32(8) 3_766 . . 3_766 ?
C11S C1S C12S C15S -106(13) 3_766 . . 3_766 ?
C7S C1S C12S C15S -99(9) . . . 3_766 ?
C5S C1S C12S C15S -130(10) . . . 3_766 ?
C17S C1S C12S C15S -85(8) . . . 3_766 ?
C10S C1S C12S C15S 12(100) . . . 3_766 ?
C9S C1S C12S C15S 4(7) 3_766 . . 3_766 ?
C16S C1S C12S C15S -35(9) 3_766 . . 3_766 ?
C3S C1S C12S C15S -105(11) . . . 3_766 ?
C18S C1S C12S C3S -32(14) 3_766 . . . ?
C6S C1S C12S C3S 137(12) 3_766 . . . ?
C11S C1S C12S C3S 0(18) 3_766 . . . ?
C15S C1S C12S C3S 105(11) 3_766 . . . ?
C7S C1S C12S C3S 7(10) . . . . ?
C5S C1S C12S C3S -25(8) . . . . ?
C17S C1S C12S C3S 21(13) . . . . ?
C10S C1S C12S C3S 117(100) . . . . ?
C9S C1S C12S C3S 109(12) 3_766 . . . ?
C16S C1S C12S C3S 70(12) 3_766 . . . ?
C18S C1S C12S C16S -102(14) 3_766 . . 3_766 ?
C6S C1S C12S C16S 68(7) 3_766 . . 3_766 ?
C11S C1S C12S C16S -70(12) 3_766 . . 3_766 ?
C15S C1S C12S C16S 35(9) 3_766 . . 3_766 ?
C7S C1S C12S C16S -63(7) . . . 3_766 ?
C5S C1S C12S C16S -95(12) . . . 3_766 ?
C17S C1S C12S C16S -49(8) . . . 3_766 ?
C10S C1S C12S C16S 47(100) . . . 3_766 ?
C9S C1S C12S C16S 39(4) 3_766 . . 3_766 ?
C3S C1S C12S C16S -70(12) . . . 3_766 ?
C18S C1S C12S C17S -53(12) 3_766 . . . ?
C6S C1S C12S C17S 117(10) 3_766 . . . ?
C11S C1S C12S C17S -21(9) 3_766 . . . ?
C15S C1S C12S C17S 85(8) 3_766 . . . ?
C7S C1S C12S C17S -14(8) . . . . ?
C5S C1S C12S C17S -46(11) . . . . ?
C10S C1S C12S C17S 97(100) . . . . ?
C9S C1S C12S C17S 89(6) 3_766 . . . ?
C16S C1S C12S C17S 49(8) 3_766 . . . ?
C3S C1S C12S C17S -21(13) . . . . ?
C5S C10S C12S C1S 142(100) . . . . ?
C8S C10S C12S C1S 4(100) 3_766 . . . ?
C3S C10S C12S C1S 120(100) . . . . ?
C7S C10S C12S C1S 110(100) . . . . ?
C18S C10S C12S C1S 147(100) 3_766 . . . ?
C16S C10S C12S C1S 48(100) 3_766 . . . ?
C6S C10S C12S C1S -19(100) 3_766 . . . ?
C2S C10S C12S C1S 74(100) . . . . ?
C4S C10S C12S C1S 95(100) . . . . ?
C9S C10S C12S C1S 8(100) 3_766 . . . ?
C5S C10S C12S C18S -4(21) . . . 3_766 ?
C8S C10S C12S C18S -142(25) 3_766 . . 3_766 ?
C3S C10S C12S C18S -27(27) . . . 3_766 ?
C7S C10S C12S C18S -37(22) . . . 3_766 ?
C16S C10S C12S C18S -99(26) 3_766 . . 3_766 ?
C6S C10S C12S C18S -166(40) 3_766 . . 3_766 ?
C2S C10S C12S C18S -72(26) . . . 3_766 ?
C1S C10S C12S C18S -147(100) . . . 3_766 ?
C4S C10S C12S C18S -52(27) . . . 3_766 ?
C9S C10S C12S C18S -139(28) 3_766 . . 3_766 ?
C5S C10S C12S C6S 161(23) . . . 3_766 ?
C8S C10S C12S C6S 23(20) 3_766 . . 3_766 ?
C3S C10S C12S C6S 139(18) . . . 3_766 ?
C7S C10S C12S C6S 129(21) . . . 3_766 ?
C18S C10S C12S C6S 166(40) 3_766 . . 3_766 ?
C16S C10S C12S C6S 66(16) 3_766 . . 3_766 ?
C2S C10S C12S C6S 93(18) . . . 3_766 ?
C1S C10S C12S C6S 19(100) . . . 3_766 ?
C4S C10S C12S C6S 114(17) . . . 3_766 ?
C9S C10S C12S C6S 27(13) 3_766 . . 3_766 ?
C8S C10S C12S C5S -138(11) 3_766 . . . ?
C3S C10S C12S C5S -22(10) . . . . ?
C7S C10S C12S C5S -33(8) . . . . ?
C18S C10S C12S C5S 4(21) 3_766 . . . ?
C16S C10S C12S C5S -95(10) 3_766 . . . ?
C6S C10S C12S C5S -161(23) 3_766 . . . ?
C2S C10S C12S C5S -68(10) . . . . ?
C1S C10S C12S C5S -142(100) . . . . ?
C4S C10S C12S C5S -47(9) . . . . ?
C9S C10S C12S C5S -135(12) 3_766 . . . ?
C5S C10S C12S C7S 33(8) . . . . ?
C8S C10S C12S C7S -106(10) 3_766 . . . ?
C3S C10S C12S C7S 10(11) . . . . ?
C18S C10S C12S C7S 37(22) 3_766 . . . ?
C16S C10S C12S C7S -62(8) 3_766 . . . ?
C6S C10S C12S C7S -129(22) 3_766 . . . ?
C2S C10S C12S C7S -36(11) . . . . ?
C1S C10S C12S C7S -110(100) . . . . ?
C4S C10S C12S C7S -15(10) . . . . ?
C9S C10S C12S C7S -102(10) 3_766 . . . ?
C5S C10S C12S C11S 33(24) . . . 3_766 ?
C8S C10S C12S C11S -105(27) 3_766 . . 3_766 ?
C3S C10S C12S C11S 11(31) . . . 3_766 ?
C7S C10S C12S C11S 1(23) . . . 3_766 ?
C18S C10S C12S C11S 38(20) 3_766 . . 3_766 ?
C16S C10S C12S C11S -61(28) 3_766 . . 3_766 ?
C6S C10S C12S C11S -128(39) 3_766 . . 3_766 ?
C2S C10S C12S C11S -35(31) . . . 3_766 ?
C1S C10S C12S C11S -109(100) . . . 3_766 ?
C4S C10S C12S C11S -14(31) . . . 3_766 ?
C9S C10S C12S C11S -101(29) 3_766 . . 3_766 ?
C5S C10S C12S C8S 138(11) . . . 3_766 ?
C3S C10S C12S C8S 116(10) . . . 3_766 ?
C7S C10S C12S C8S 106(10) . . . 3_766 ?
C18S C10S C12S C8S 142(25) 3_766 . . 3_766 ?
C16S C10S C12S C8S 43(7) 3_766 . . 3_766 ?
C6S C10S C12S C8S -23(20) 3_766 . . 3_766 ?
C2S C10S C12S C8S 70(8) . . . 3_766 ?
C1S C10S C12S C8S -4(100) . . . 3_766 ?
C4S C10S C12S C8S 91(8) . . . 3_766 ?
C9S C10S C12S C8S 4(9) 3_766 . . 3_766 ?
C5S C10S C12S C15S 131(19) . . . 3_766 ?
C8S C10S C12S C15S -7(17) 3_766 . . 3_766 ?
C3S C10S C12S C15S 109(15) . . . 3_766 ?
C7S C10S C12S C15S 99(17) . . . 3_766 ?
C18S C10S C12S C15S 136(35) 3_766 . . 3_766 ?
C16S C10S C12S C15S 37(13) 3_766 . . 3_766 ?
C6S C10S C12S C15S -30(9) 3_766 . . 3_766 ?
C2S C10S C12S C15S 63(16) . . . 3_766 ?
C1S C10S C12S C15S -11(100) . . . 3_766 ?
C4S C10S C12S C15S 84(15) . . . 3_766 ?
C9S C10S C12S C15S -3(10) 3_766 . . 3_766 ?
C5S C10S C12S C3S 22(10) . . . . ?
C8S C10S C12S C3S -116(10) 3_766 . . . ?
C7S C10S C12S C3S -10(11) . . . . ?
C18S C10S C12S C3S 27(27) 3_766 . . . ?
C16S C10S C12S C3S -72(8) 3_766 . . . ?
C6S C10S C12S C3S -139(18) 3_766 . . . ?
C2S C10S C12S C3S -46(6) . . . . ?
C1S C10S C12S C3S -120(100) . . . . ?
C4S C10S C12S C3S -25(5) . . . . ?
C9S C10S C12S C3S -112(9) 3_766 . . . ?
C5S C10S C12S C16S 95(10) . . . 3_766 ?
C8S C10S C12S C16S -43(7) 3_766 . . 3_766 ?
C3S C10S C12S C16S 72(8) . . . 3_766 ?
C7S C10S C12S C16S 62(8) . . . 3_766 ?
C18S C10S C12S C16S 99(26) 3_766 . . 3_766 ?
C6S C10S C12S C16S -66(16) 3_766 . . 3_766 ?
C2S C10S C12S C16S 27(7) . . . 3_766 ?
C1S C10S C12S C16S -48(100) . . . 3_766 ?
C4S C10S C12S C16S 47(6) . . . 3_766 ?
C9S C10S C12S C16S -40(5) 3_766 . . 3_766 ?
C5S C10S C12S C17S 49(11) . . . . ?
C8S C10S C12S C17S -89(12) 3_766 . . . ?
C3S C10S C12S C17S 27(15) . . . . ?
C7S C10S C12S C17S 17(8) . . . . ?
C18S C10S C12S C17S 54(21) 3_766 . . . ?
C16S C10S C12S C17S -45(11) 3_766 . . . ?
C6S C10S C12S C17S -112(23) 3_766 . . . ?
C2S C10S C12S C17S -19(15) . . . . ?
C1S C10S C12S C17S -93(100) . . . . ?
C4S C10S C12S C17S 2(14) . . . . ?
C9S C10S C12S C17S -85(12) 3_766 . . . ?
C7S C5S C12S C1S -59(13) . . . . ?
C18S C5S C12S C1S 6(12) 3_766 . . . ?
C3S C5S C12S C1S -146(12) . . . . ?
C10S C5S C12S C1S -177(17) . . . . ?
C17S C5S C12S C1S -41(9) . . . . ?
C11S C5S C12S C1S -11(7) 3_766 . . . ?
C4S C5S C12S C1S -122(10) . . . . ?
C6S C5S C12S C1S -19(16) 3_766 . . . ?
C16S C5S C12S C1S -96(7) 3_766 . . . ?
C2S C5S C12S C1S -125(9) . . . . ?
C7S C5S C12S C10S 119(13) . . . . ?
C18S C5S C12S C10S -176(17) 3_766 . . . ?
C3S C5S C12S C10S 32(13) . . . . ?
C1S C5S C12S C10S 177(17) . . . . ?
C17S C5S C12S C10S 137(11) . . . . ?
C11S C5S C12S C10S 166(12) 3_766 . . . ?
C4S C5S C12S C10S 55(10) . . . . ?
C6S C5S C12S C10S 158(29) 3_766 . . . ?
C16S C5S C12S C10S 81(12) 3_766 . . . ?
C2S C5S C12S C10S 53(10) . . . . ?
C7S C5S C12S C18S -65(13) . . . 3_766 ?
C3S C5S C12S C18S -152(17) . . . 3_766 ?
C10S C5S C12S C18S 176(17) . . . 3_766 ?
C1S C5S C12S C18S -6(12) . . . 3_766 ?
C17S C5S C12S C18S -47(11) . . . 3_766 ?
C11S C5S C12S C18S -17(11) 3_766 . . 3_766 ?
C4S C5S C12S C18S -129(14) . . . 3_766 ?
C6S C5S C12S C18S -25(22) 3_766 . . 3_766 ?
C16S C5S C12S C18S -102(12) 3_766 . . 3_766 ?
C2S C5S C12S C18S -131(13) . . . 3_766 ?
C7S C5S C12S C6S -40(26) . . . 3_766 ?
C18S C5S C12S C6S 25(22) 3_766 . . 3_766 ?
C3S C5S C12S C6S -127(22) . . . 3_766 ?
C10S C5S C12S C6S -158(29) . . . 3_766 ?
C1S C5S C12S C6S 19(16) . . . 3_766 ?
C17S C5S C12S C6S -22(23) . . . 3_766 ?
C11S C5S C12S C6S 8(21) 3_766 . . 3_766 ?
C4S C5S C12S C6S -104(22) . . . 3_766 ?
C16S C5S C12S C6S -77(20) 3_766 . . 3_766 ?
C2S C5S C12S C6S -106(22) . . . 3_766 ?
C18S C5S C12S C7S 65(13) 3_766 . . . ?
C3S C5S C12S C7S -87(13) . . . . ?
C10S C5S C12S C7S -119(13) . . . . ?
C1S C5S C12S C7S 59(13) . . . . ?
C17S C5S C12S C7S 18(8) . . . . ?
C11S C5S C12S C7S 48(10) 3_766 . . . ?
C4S C5S C12S C7S -64(9) . . . . ?
C6S C5S C12S C7S 40(26) 3_766 . . . ?
C16S C5S C12S C7S -37(11) 3_766 . . . ?
C2S C5S C12S C7S -66(9) . . . . ?
C7S C5S C12S C11S -48(10) . . . 3_766 ?
C18S C5S C12S C11S 17(11) 3_766 . . 3_766 ?
C3S C5S C12S C11S -135(10) . . . 3_766 ?
C10S C5S C12S C11S -166(12) . . . 3_766 ?
C1S C5S C12S C11S 11(7) . . . 3_766 ?
C17S C5S C12S C11S -29(4) . . . 3_766 ?
C4S C5S C12S C11S -111(6) . . . 3_766 ?
C6S C5S C12S C11S -8(21) 3_766 . . 3_766 ?
C16S C5S C12S C11S -85(5) 3_766 . . 3_766 ?
C2S C5S C12S C11S -114(5) . . . 3_766 ?
C7S C5S C12S C8S 77(12) . . . 3_766 ?
C18S C5S C12S C8S 142(14) 3_766 . . 3_766 ?
C3S C5S C12S C8S -10(13) . . . 3_766 ?
C10S C5S C12S C8S -42(11) . . . 3_766 ?
C1S C5S C12S C8S 135(12) . . . 3_766 ?
C17S C5S C12S C8S 95(7) . . . 3_766 ?
C11S C5S C12S C8S 124(8) 3_766 . . 3_766 ?
C4S C5S C12S C8S 13(10) . . . 3_766 ?
C6S C5S C12S C8S 116(25) 3_766 . . 3_766 ?
C16S C5S C12S C8S 39(7) 3_766 . . 3_766 ?
C2S C5S C12S C8S 11(8) . . . 3_766 ?
C7S C5S C12S C15S -19(17) . . . 3_766 ?
C18S C5S C12S C15S 46(14) 3_766 . . 3_766 ?
C3S C5S C12S C15S -106(14) . . . 3_766 ?
C10S C5S C12S C15S -137(20) . . . 3_766 ?
C1S C5S C12S C15S 40(7) . . . 3_766 ?
C17S C5S C12S C15S -1(13) . . . 3_766 ?
C11S C5S C12S C15S 29(11) 3_766 . . 3_766 ?
C4S C5S C12S C15S -83(13) . . . 3_766 ?
C6S C5S C12S C15S 21(12) 3_766 . . 3_766 ?
C16S C5S C12S C15S -56(10) 3_766 . . 3_766 ?
C2S C5S C12S C15S -85(12) . . . 3_766 ?
C7S C5S C12S C3S 87(13) . . . . ?
C18S C5S C12S C3S 152(17) 3_766 . . . ?
C10S C5S C12S C3S -32(13) . . . . ?
C1S C5S C12S C3S 146(12) . . . . ?
C17S C5S C12S C3S 105(10) . . . . ?
C11S C5S C12S C3S 135(10) 3_766 . . . ?
C4S C5S C12S C3S 23(6) . . . . ?
C6S C5S C12S C3S 127(22) 3_766 . . . ?
C16S C5S C12S C3S 50(10) 3_766 . . . ?
C2S C5S C12S C3S 21(7) . . . . ?
C7S C5S C12S C16S 37(11) . . . 3_766 ?
C18S C5S C12S C16S 102(12) 3_766 . . 3_766 ?
C3S C5S C12S C16S -50(10) . . . 3_766 ?
C10S C5S C12S C16S -81(12) . . . 3_766 ?
C1S C5S C12S C16S 96(8) . . . 3_766 ?
C17S C5S C12S C16S 55(6) . . . 3_766 ?
C11S C5S C12S C16S 85(5) 3_766 . . 3_766 ?
C4S C5S C12S C16S -27(7) . . . 3_766 ?
C6S C5S C12S C16S 77(20) 3_766 . . 3_766 ?
C2S C5S C12S C16S -29(5) . . . 3_766 ?
C7S C5S C12S C17S -18(8) . . . . ?
C18S C5S C12S C17S 47(11) 3_766 . . . ?
C3S C5S C12S C17S -105(10) . . . . ?
C10S C5S C12S C17S -137(11) . . . . ?
C1S C5S C12S C17S 41(9) . . . . ?
C11S C5S C12S C17S 29(4) 3_766 . . . ?
C4S C5S C12S C17S -82(6) . . . . ?
C6S C5S C12S C17S 22(23) 3_766 . . . ?
C16S C5S C12S C17S -55(6) 3_766 . . . ?
C2S C5S C12S C17S -84(4) . . . . ?
C5S C7S C12S C1S 121(14) . . . . ?
C18S C7S C12S C1S 38(11) 3_766 . . . ?
C17S C7S C12S C1S -24(13) . . . . ?
C3S C7S C12S C1S 173(11) . . . . ?
C11S C7S C12S C1S 4(7) 3_766 . . . ?
C10S C7S C12S C1S -176(14) . . . . ?
C16S C7S C12S C1S -101(7) 3_766 . . . ?
C14S C7S C12S C1S -111(9) . . . . ?
C4S C7S C12S C1S -158(9) . . . . ?
C6S C7S C12S C1S -33(8) 3_766 . . . ?
C5S C7S C12S C10S -63(13) . . . . ?
C18S C7S C12S C10S -146(16) 3_766 . . . ?
C17S C7S C12S C10S 151(14) . . . . ?
C3S C7S C12S C10S -11(13) . . . . ?
C1S C7S C12S C10S 176(14) . . . . ?
C11S C7S C12S C10S 180(12) 3_766 . . . ?
C16S C7S C12S C10S 75(12) 3_766 . . . ?
C14S C7S C12S C10S 65(12) . . . . ?
C4S C7S C12S C10S 18(12) . . . . ?
C6S C7S C12S C10S 142(18) 3_766 . . . ?
C5S C7S C12S C18S 83(14) . . . 3_766 ?
C17S C7S C12S C18S -62(13) . . . 3_766 ?
C3S C7S C12S C18S 135(15) . . . 3_766 ?
C1S C7S C12S C18S -38(11) . . . 3_766 ?
C11S C7S C12S C18S -34(10) 3_766 . . 3_766 ?
C10S C7S C12S C18S 146(16) . . . 3_766 ?
C16S C7S C12S C18S -139(13) 3_766 . . 3_766 ?
C14S C7S C12S C18S -149(15) . . . 3_766 ?
C4S C7S C12S C18S 164(14) . . . 3_766 ?
C6S C7S C12S C18S -71(15) 3_766 . . 3_766 ?
C5S C7S C12S C6S 154(17) . . . 3_766 ?
C18S C7S C12S C6S 71(15) 3_766 . . 3_766 ?
C17S C7S C12S C6S 9(16) . . . 3_766 ?
C3S C7S C12S C6S -154(13) . . . 3_766 ?
C1S C7S C12S C6S 33(8) . . . 3_766 ?
C11S C7S C12S C6S 37(11) 3_766 . . 3_766 ?
C10S C7S C12S C6S -142(18) . . . 3_766 ?
C16S C7S C12S C6S -68(9) 3_766 . . 3_766 ?
C14S C7S C12S C6S -78(12) . . . 3_766 ?
C4S C7S C12S C6S -124(10) . . . 3_766 ?
C18S C7S C12S C5S -83(14) 3_766 . . . ?
C17S C7S C12S C5S -145(17) . . . . ?
C3S C7S C12S C5S 52(11) . . . . ?
C1S C7S C12S C5S -121(14) . . . . ?
C11S C7S C12S C5S -117(14) 3_766 . . . ?
C10S C7S C12S C5S 63(13) . . . . ?
C16S C7S C12S C5S 138(13) 3_766 . . . ?
C14S C7S C12S C5S 128(13) . . . . ?
C4S C7S C12S C5S 82(12) . . . . ?
C6S C7S C12S C5S -154(17) 3_766 . . . ?
C5S C7S C12S C11S 117(13) . . . 3_766 ?
C18S C7S C12S C11S 34(10) 3_766 . . 3_766 ?
C17S C7S C12S C11S -28(8) . . . 3_766 ?
C3S C7S C12S C11S 169(11) . . . 3_766 ?
C1S C7S C12S C11S -4(7) . . . 3_766 ?
C10S C7S C12S C11S -180(12) . . . 3_766 ?
C16S C7S C12S C11S -105(7) 3_766 . . 3_766 ?
C14S C7S C12S C11S -115(9) . . . 3_766 ?
C4S C7S C12S C11S -161(10) . . . 3_766 ?
C6S C7S C12S C11S -37(11) 3_766 . . 3_766 ?
C5S C7S C12S C8S -121(14) . . . 3_766 ?
C18S C7S C12S C8S 156(14) 3_766 . . 3_766 ?
C17S C7S C12S C8S 94(12) . . . 3_766 ?
C3S C7S C12S C8S -69(10) . . . 3_766 ?
C1S C7S C12S C8S 118(8) . . . 3_766 ?
C11S C7S C12S C8S 122(7) 3_766 . . 3_766 ?
C10S C7S C12S C8S -58(13) . . . 3_766 ?
C16S C7S C12S C8S 17(7) 3_766 . . 3_766 ?
C14S C7S C12S C8S 7(10) . . . 3_766 ?
C4S C7S C12S C8S -40(9) . . . 3_766 ?
C6S C7S C12S C8S 84(9) 3_766 . . 3_766 ?
C5S C7S C12S C15S 164(14) . . . 3_766 ?
C18S C7S C12S C15S 82(12) 3_766 . . 3_766 ?
C17S C7S C12S C15S 19(13) . . . 3_766 ?
C3S C7S C12S C15S -143(10) . . . 3_766 ?
C1S C7S C12S C15S 44(6) . . . 3_766 ?
C11S C7S C12S C15S 47(6) 3_766 . . 3_766 ?
C10S C7S C12S C15S -132(14) . . . 3_766 ?
C16S C7S C12S C15S -57(6) 3_766 . . 3_766 ?
C14S C7S C12S C15S -67(9) . . . 3_766 ?
C4S C7S C12S C15S -114(8) . . . 3_766 ?
C6S C7S C12S C15S 10(7) 3_766 . . 3_766 ?
C5S C7S C12S C3S -52(11) . . . . ?
C18S C7S C12S C3S -135(15) 3_766 . . . ?
C17S C7S C12S C3S 163(16) . . . . ?
C1S C7S C12S C3S -173(11) . . . . ?
C11S C7S C12S C3S -169(11) 3_766 . . . ?
C10S C7S C12S C3S 11(13) . . . . ?
C16S C7S C12S C3S 86(8) 3_766 . . . ?
C14S C7S C12S C3S 76(8) . . . . ?
C4S C7S C12S C3S 29(6) . . . . ?
C6S C7S C12S C3S 154(13) 3_766 . . . ?
C5S C7S C12S C16S -138(13) . . . 3_766 ?
C18S C7S C12S C16S 139(13) 3_766 . . 3_766 ?
C17S C7S C12S C16S 77(12) . . . 3_766 ?
C3S C7S C12S C16S -86(8) . . . 3_766 ?
C1S C7S C12S C16S 101(7) . . . 3_766 ?
C11S C7S C12S C16S 105(7) 3_766 . . 3_766 ?
C10S C7S C12S C16S -75(12) . . . 3_766 ?
C14S C7S C12S C16S -10(7) . . . 3_766 ?
C4S C7S C12S C16S -57(6) . . . 3_766 ?
C6S C7S C12S C16S 68(9) 3_766 . . 3_766 ?
C5S C7S C12S C17S 145(17) . . . . ?
C18S C7S C12S C17S 62(13) 3_766 . . . ?
C3S C7S C12S C17S -163(16) . . . . ?
C1S C7S C12S C17S 24(13) . . . . ?
C11S C7S C12S C17S 28(9) 3_766 . . . ?
C10S C7S C12S C17S -151(14) . . . . ?
C16S C7S C12S C17S -77(12) 3_766 . . . ?
C14S C7S C12S C17S -87(13) . . . . ?
C4S C7S C12S C17S -133(15) . . . . ?
C6S C7S C12S C17S -9(16) 3_766 . . . ?
C5S C3S C12S C1S 45(14) . . . . ?
C4S C3S C12S C1S -79(19) . . . . ?
C7S C3S C12S C1S -9(13) . . . . ?
C10S C3S C12S C1S -175(18) . . . . ?
C2S C3S C12S C1S -101(13) . . . . ?
C18S C3S C12S C1S 22(10) 3_766 . . . ?
C14S C3S C12S C1S -62(13) . . . . ?
C16S C3S C12S C1S -82(11) 3_766 . . . ?
C13S C3S C12S C1S -86(13) . . . . ?
C17S C3S C12S C1S -17(10) . . . . ?
C8S C3S C12S C1S -127(13) 3_766 . . . ?
C5S C3S C12S C10S -140(16) . . . . ?
C4S C3S C12S C10S 96(18) . . . . ?
C7S C3S C12S C10S 167(15) . . . . ?
C2S C3S C12S C10S 74(13) . . . . ?
C18S C3S C12S C10S -162(16) 3_766 . . . ?
C14S C3S C12S C10S 113(13) . . . . ?
C16S C3S C12S C10S 93(13) 3_766 . . . ?
C13S C3S C12S C10S 89(13) . . . . ?
C17S C3S C12S C10S 158(13) . . . . ?
C8S C3S C12S C10S 48(11) 3_766 . . . ?
C5S C3S C12S C18S 22(13) . . . 3_766 ?
C4S C3S C12S C18S -102(16) . . . 3_766 ?
C7S C3S C12S C18S -31(12) . . . 3_766 ?
C10S C3S C12S C18S 162(16) . . . 3_766 ?
C2S C3S C12S C18S -124(11) . . . 3_766 ?
C14S C3S C12S C18S -85(10) . . . 3_766 ?
C16S C3S C12S C18S -104(10) 3_766 . . 3_766 ?
C13S C3S C12S C18S -108(10) . . . 3_766 ?
C17S C3S C12S C18S -40(8) . . . 3_766 ?
C8S C3S C12S C18S -149(11) 3_766 . . 3_766 ?
C5S C3S C12S C6S 105(18) . . . 3_766 ?
C4S C3S C12S C6S -19(26) . . . 3_766 ?
C7S C3S C12S C6S 52(19) . . . 3_766 ?
C10S C3S C12S C6S -115(22) . . . 3_766 ?
C2S C3S C12S C6S -41(20) . . . 3_766 ?
C18S C3S C12S C6S 83(16) 3_766 . . 3_766 ?
C14S C3S C12S C6S -2(19) . . . 3_766 ?
C16S C3S C12S C6S -22(17) 3_766 . . 3_766 ?
C13S C3S C12S C6S -26(19) . . . 3_766 ?
C17S C3S C12S C6S 43(16) . . . 3_766 ?
C8S C3S C12S C6S -67(18) 3_766 . . 3_766 ?
C4S C3S C12S C5S -124(17) . . . . ?
C7S C3S C12S C5S -53(12) . . . . ?
C10S C3S C12S C5S 140(16) . . . . ?
C2S C3S C12S C5S -146(12) . . . . ?
C18S C3S C12S C5S -22(13) 3_766 . . . ?
C14S C3S C12S C5S -107(11) . . . . ?
C16S C3S C12S C5S -126(11) 3_766 . . . ?
C13S C3S C12S C5S -130(11) . . . . ?
C17S C3S C12S C5S -62(10) . . . . ?
C8S C3S C12S C5S -171(11) 3_766 . . . ?
C5S C3S C12S C7S 53(12) . . . . ?
C4S C3S C12S C7S -71(12) . . . . ?
C10S C3S C12S C7S -167(15) . . . . ?
C2S C3S C12S C7S -93(8) . . . . ?
C18S C3S C12S C7S 31(12) 3_766 . . . ?
C14S C3S C12S C7S -54(7) . . . . ?
C16S C3S C12S C7S -73(8) 3_766 . . . ?
C13S C3S C12S C7S -77(8) . . . . ?
C17S C3S C12S C7S -8(8) . . . . ?
C8S C3S C12S C7S -118(9) 3_766 . . . ?
C5S C3S C12S C11S 44(10) . . . 3_766 ?
C4S C3S C12S C11S -79(14) . . . 3_766 ?
C7S C3S C12S C11S -9(9) . . . 3_766 ?
C10S C3S C12S C11S -175(14) . . . 3_766 ?
C2S C3S C12S C11S -101(7) . . . 3_766 ?
C18S C3S C12S C11S 22(8) 3_766 . . 3_766 ?
C14S C3S C12S C11S -62(7) . . . 3_766 ?
C16S C3S C12S C11S -82(6) 3_766 . . 3_766 ?
C13S C3S C12S C11S -86(6) . . . 3_766 ?
C17S C3S C12S C11S -17(4) . . . 3_766 ?
C8S C3S C12S C11S -127(7) 3_766 . . 3_766 ?
C5S C3S C12S C8S 171(11) . . . 3_766 ?
C4S C3S C12S C8S 48(13) . . . 3_766 ?
C7S C3S C12S C8S 118(9) . . . 3_766 ?
C10S C3S C12S C8S -48(11) . . . 3_766 ?
C2S C3S C12S C8S 26(7) . . . 3_766 ?
C18S C3S C12S C8S 149(11) 3_766 . . 3_766 ?
C14S C3S C12S C8S 65(6) . . . 3_766 ?
C16S C3S C12S C8S 45(5) 3_766 . . 3_766 ?
C13S C3S C12S C8S 41(5) . . . 3_766 ?
C17S C3S C12S C8S 110(6) . . . 3_766 ?
C5S C3S C12S C15S 100(12) . . . 3_766 ?
C4S C3S C12S C15S -23(18) . . . 3_766 ?
C7S C3S C12S C15S 47(12) . . . 3_766 ?
C10S C3S C12S C15S -119(16) . . . 3_766 ?
C2S C3S C12S C15S -46(12) . . . 3_766 ?
C18S C3S C12S C15S 78(10) 3_766 . . 3_766 ?
C14S C3S C12S C15S -7(11) . . . 3_766 ?
C16S C3S C12S C15S -26(9) 3_766 . . 3_766 ?
C13S C3S C12S C15S -30(11) . . . 3_766 ?
C17S C3S C12S C15S 39(9) . . . 3_766 ?
C8S C3S C12S C15S -71(10) 3_766 . . 3_766 ?
C5S C3S C12S C16S 126(11) . . . 3_766 ?
C4S C3S C12S C16S 3(12) . . . 3_766 ?
C7S C3S C12S C16S 73(8) . . . 3_766 ?
C10S C3S C12S C16S -93(13) . . . 3_766 ?
C2S C3S C12S C16S -19(6) . . . 3_766 ?
C18S C3S C12S C16S 104(10) 3_766 . . 3_766 ?
C14S C3S C12S C16S 20(5) . . . 3_766 ?
C13S C3S C12S C16S -4(5) . . . 3_766 ?
C17S C3S C12S C16S 65(5) . . . 3_766 ?
C8S C3S C12S C16S -45(5) 3_766 . . 3_766 ?
C5S C3S C12S C17S 62(10) . . . . ?
C4S C3S C12S C17S -62(12) . . . . ?
C7S C3S C12S C17S 8(8) . . . . ?
C10S C3S C12S C17S -158(13) . . . . ?
C2S C3S C12S C17S -84(6) . . . . ?
C18S C3S C12S C17S 40(8) 3_766 . . . ?
C14S C3S C12S C17S -45(5) . . . . ?
C16S C3S C12S C17S -65(5) 3_766 . . . ?
C13S C3S C12S C17S -69(5) . . . . ?
C8S C3S C12S C17S -110(6) 3_766 . . . ?
C15S C9S C13S C2S -138(25) . . . . ?
C6S C9S C13S C2S -165(7) . . . . ?
C8S C9S C13S C2S 141(9) . . . . ?
C16S C9S C13S C2S 107(8) . . . . ?
C14S C9S C13S C2S 49(35) . . . . ?
C4S C9S C13S C2S -19(4) . . . . ?
C16S C9S C13S C2S 78(6) 3_766 . . . ?
C8S C9S C13S C2S 70(6) 3_766 . . . ?
C12S C9S C13S C2S 164(7) 3_766 . . . ?
C1S C9S C13S C2S -179(8) 3_766 . . . ?
C2S C9S C13S C14S -49(35) . . . . ?
C15S C9S C13S C14S 173(29) . . . . ?
C6S C9S C13S C14S 145(34) . . . . ?
C8S C9S C13S C14S 92(38) . . . . ?
C16S C9S C13S C14S 58(38) . . . . ?
C4S C9S C13S C14S -68(35) . . . . ?
C16S C9S C13S C14S 28(33) 3_766 . . . ?
C8S C9S C13S C14S 21(37) 3_766 . . . ?
C12S C9S C13S C14S 115(36) 3_766 . . . ?
C1S C9S C13S C14S 131(34) 3_766 . . . ?
C2S C9S C13S C8S -141(9) . . . . ?
C15S C9S C13S C8S 81(27) . . . . ?
C6S C9S C13S C8S 54(10) . . . . ?
C16S C9S C13S C8S -34(7) . . . . ?
C14S C9S C13S C8S -92(38) . . . . ?
C4S C9S C13S C8S -160(9) . . . . ?
C16S C9S C13S C8S -64(8) 3_766 . . . ?
C8S C9S C13S C8S -71(5) 3_766 . . . ?
C12S C9S C13S C8S 23(8) 3_766 . . . ?
C1S C9S C13S C8S 39(11) 3_766 . . . ?
C2S C9S C13S C16S -78(6) . . . 3_766 ?
C15S C9S C13S C16S 145(24) . . . 3_766 ?
C6S C9S C13S C16S 117(7) . . . 3_766 ?
C8S C9S C13S C16S 64(8) . . . 3_766 ?
C16S C9S C13S C16S 29(10) . . . 3_766 ?
C14S C9S C13S C16S -28(33) . . . 3_766 ?
C4S C9S C13S C16S -96(7) . . . 3_766 ?
C8S C9S C13S C16S -7(7) 3_766 . . 3_766 ?
C12S C9S C13S C16S 86(8) 3_766 . . 3_766 ?
C1S C9S C13S C16S 103(9) 3_766 . . 3_766 ?
C2S C9S C13S C4S 19(4) . . . . ?
C15S C9S C13S C4S -119(24) . . . . ?
C6S C9S C13S C4S -146(6) . . . . ?
C8S C9S C13S C4S 160(9) . . . . ?
C16S C9S C13S C4S 126(7) . . . . ?
C14S C9S C13S C4S 68(35) . . . . ?
C16S C9S C13S C4S 96(7) 3_766 . . . ?
C8S C9S C13S C4S 89(6) 3_766 . . . ?
C12S C9S C13S C4S -177(6) 3_766 . . . ?
C1S C9S C13S C4S -160(6) 3_766 . . . ?
C2S C9S C13S C16S -107(8) . . . . ?
C15S C9S C13S C16S 116(27) . . . . ?
C6S C9S C13S C16S 88(8) . . . . ?
C8S C9S C13S C16S 34(7) . . . . ?
C14S C9S C13S C16S -58(38) . . . . ?
C4S C9S C13S C16S -126(7) . . . . ?
C16S C9S C13S C16S -29(10) 3_766 . . . ?
C8S C9S C13S C16S -36(5) 3_766 . . . ?
C12S C9S C13S C16S 57(7) 3_766 . . . ?
C1S C9S C13S C16S 74(9) 3_766 . . . ?
C2S C9S C13S C6S 165(7) . . . . ?
C15S C9S C13S C6S 28(21) . . . . ?
C8S C9S C13S C6S -54(10) . . . . ?
C16S C9S C13S C6S -88(8) . . . . ?
C14S C9S C13S C6S -145(34) . . . . ?
C4S C9S C13S C6S 146(6) . . . . ?
C16S C9S C13S C6S -117(7) 3_766 . . . ?
C8S C9S C13S C6S -124(8) 3_766 . . . ?
C12S C9S C13S C6S -31(6) 3_766 . . . ?
C1S C9S C13S C6S -14(4) 3_766 . . . ?
C2S C9S C13S C15S 138(25) . . . . ?
C6S C9S C13S C15S -28(21) . . . . ?
C8S C9S C13S C15S -81(27) . . . . ?
C16S C9S C13S C15S -116(27) . . . . ?
C14S C9S C13S C15S -173(29) . . . . ?
C4S C9S C13S C15S 119(24) . . . . ?
C16S C9S C13S C15S -145(24) 3_766 . . . ?
C8S C9S C13S C15S -152(27) 3_766 . . . ?
C12S C9S C13S C15S -58(25) 3_766 . . . ?
C1S C9S C13S C15S -42(21) 3_766 . . . ?
C2S C9S C13S C3S -11(5) . . . . ?
C15S C9S C13S C3S -149(24) . . . . ?
C6S C9S C13S C3S -176(6) . . . . ?
C8S C9S C13S C3S 130(8) . . . . ?
C16S C9S C13S C3S 96(7) . . . . ?
C14S C9S C13S C3S 38(35) . . . . ?
C4S C9S C13S C3S -30(4) . . . . ?
C16S C9S C13S C3S 66(5) 3_766 . . . ?
C8S C9S C13S C3S 59(5) 3_766 . . . ?
C12S C9S C13S C3S 153(6) 3_766 . . . ?
C1S C9S C13S C3S 170(7) 3_766 . . . ?
C2S C9S C13S C8S -70(6) . . . 3_766 ?
C15S C9S C13S C8S 152(27) . . . 3_766 ?
C6S C9S C13S C8S 124(8) . . . 3_766 ?
C8S C9S C13S C8S 71(5) . . . 3_766 ?
C16S C9S C13S C8S 36(5) . . . 3_766 ?
C14S C9S C13S C8S -21(37) . . . 3_766 ?
C4S C9S C13S C8S -89(6) . . . 3_766 ?
C16S C9S C13S C8S 7(7) 3_766 . . 3_766 ?
C12S C9S C13S C8S 94(6) 3_766 . . 3_766 ?
C1S C9S C13S C8S 110(9) 3_766 . . 3_766 ?
C2S C9S C13S C10S -155(7) . . . 3_766 ?
C15S C9S C13S C10S 67(26) . . . 3_766 ?
C6S C9S C13S C10S 40(7) . . . 3_766 ?
C8S C9S C13S C10S -14(6) . . . 3_766 ?
C16S C9S C13S C10S -48(6) . . . 3_766 ?
C14S C9S C13S C10S -106(37) . . . 3_766 ?
C4S C9S C13S C10S -174(6) . . . 3_766 ?
C16S C9S C13S C10S -77(6) 3_766 . . 3_766 ?
C8S C9S C13S C10S -85(4) 3_766 . . 3_766 ?
C12S C9S C13S C10S 9(6) 3_766 . . 3_766 ?
C1S C9S C13S C10S 26(8) 3_766 . . 3_766 ?
C4S C2S C13S C9S 147(8) . . . . ?
C14S C2S C13S C9S -164(13) . . . . ?
C16S C2S C13S C9S -106(8) 3_766 . . . ?
C3S C2S C13S C9S -158(10) . . . . ?
C8S C2S C13S C9S -71(17) . . . . ?
C10S C2S C13S C9S -104(8) . . . . ?
C8S C2S C13S C9S -74(7) 3_766 . . . ?
C16S C2S C13S C9S -49(7) . . . . ?
C15S C2S C13S C9S 9(7) . . . . ?
C7S C2S C13S C9S -150(7) . . . . ?
C4S C2S C13S C14S -49(11) . . . . ?
C9S C2S C13S C14S 164(13) . . . . ?
C16S C2S C13S C14S 59(7) 3_766 . . . ?
C3S C2S C13S C14S 6(16) . . . . ?
C8S C2S C13S C14S 93(18) . . . . ?
C10S C2S C13S C14S 60(13) . . . . ?
C8S C2S C13S C14S 91(10) 3_766 . . . ?
C16S C2S C13S C14S 115(11) . . . . ?
C15S C2S C13S C14S 173(10) . . . . ?
C7S C2S C13S C14S 15(10) . . . . ?
C4S C2S C13S C8S -142(16) . . . . ?
C9S C2S C13S C8S 71(17) . . . . ?
C14S C2S C13S C8S -93(18) . . . . ?
C16S C2S C13S C8S -35(16) 3_766 . . . ?
C3S C2S C13S C8S -87(20) . . . . ?
C10S C2S C13S C8S -33(20) . . . . ?
C8S C2S C13S C8S -3(20) 3_766 . . . ?
C16S C2S C13S C8S 22(16) . . . . ?
C15S C2S C13S C8S 80(17) . . . . ?
C7S C2S C13S C8S -79(17) . . . . ?
C4S C2S C13S C16S -107(7) . . . 3_766 ?
C9S C2S C13S C16S 106(8) . . . 3_766 ?
C14S C2S C13S C16S -59(7) . . . 3_766 ?
C3S C2S C13S C16S -53(12) . . . 3_766 ?
C8S C2S C13S C16S 35(16) . . . 3_766 ?
C10S C2S C13S C16S 1(10) . . . 3_766 ?
C8S C2S C13S C16S 32(6) 3_766 . . 3_766 ?
C16S C2S C13S C16S 56(7) . . . 3_766 ?
C15S C2S C13S C16S 115(6) . . . 3_766 ?
C7S C2S C13S C16S -44(6) . . . 3_766 ?
C9S C2S C13S C4S -147(8) . . . . ?
C14S C2S C13S C4S 49(11) . . . . ?
C16S C2S C13S C4S 107(7) 3_766 . . . ?
C3S C2S C13S C4S 55(10) . . . . ?
C8S C2S C13S C4S 142(16) . . . . ?
C10S C2S C13S C4S 109(10) . . . . ?
C8S C2S C13S C4S 139(8) 3_766 . . . ?
C16S C2S C13S C4S 164(6) . . . . ?
C15S C2S C13S C4S -138(7) . . . . ?
C7S C2S C13S C4S 63(7) . . . . ?
C4S C2S C13S C16S -164(6) . . . . ?
C9S C2S C13S C16S 49(7) . . . . ?
C14S C2S C13S C16S -115(11) . . . . ?
C16S C2S C13S C16S -56(7) 3_766 . . . ?
C3S C2S C13S C16S -109(9) . . . . ?
C8S C2S C13S C16S -22(15) . . . . ?
C10S C2S C13S C16S -55(8) . . . . ?
C8S C2S C13S C16S -24(6) 3_766 . . . ?
C15S C2S C13S C16S 58(5) . . . . ?
C7S C2S C13S C16S -100(5) . . . . ?
C4S C2S C13S C6S 137(7) . . . . ?
C9S C2S C13S C6S -10(5) . . . . ?
C14S C2S C13S C6S -174(12) . . . . ?
C16S C2S C13S C6S -116(8) 3_766 . . . ?
C3S C2S C13S C6S -168(7) . . . . ?
C8S C2S C13S C6S -81(17) . . . . ?
C10S C2S C13S C6S -114(7) . . . . ?
C8S C2S C13S C6S -84(6) 3_766 . . . ?
C16S C2S C13S C6S -59(5) . . . . ?
C15S C2S C13S C6S -1(5) . . . . ?
C7S C2S C13S C6S -159(5) . . . . ?
C4S C2S C13S C15S 138(7) . . . . ?
C9S C2S C13S C15S -9(7) . . . . ?
C14S C2S C13S C15S -173(10) . . . . ?
C16S C2S C13S C15S -115(6) 3_766 . . . ?
C3S C2S C13S C15S -167(10) . . . . ?
C8S C2S C13S C15S -80(17) . . . . ?
C10S C2S C13S C15S -113(8) . . . . ?
C8S C2S C13S C15S -83(5) 3_766 . . . ?
C16S C2S C13S C15S -58(5) . . . . ?
C7S C2S C13S C15S -159(5) . . . . ?
C4S C2S C13S C3S -55(10) . . . . ?
C9S C2S C13S C3S 158(10) . . . . ?
C14S C2S C13S C3S -6(16) . . . . ?
C16S C2S C13S C3S 53(12) 3_766 . . . ?
C8S C2S C13S C3S 87(20) . . . . ?
C10S C2S C13S C3S 54(9) . . . . ?
C8S C2S C13S C3S 85(10) 3_766 . . . ?
C16S C2S C13S C3S 109(9) . . . . ?
C15S C2S C13S C3S 167(10) . . . . ?
C7S C2S C13S C3S 9(9) . . . . ?
C4S C2S C13S C8S -139(8) . . . 3_766 ?
C9S C2S C13S C8S 74(7) . . . 3_766 ?
C14S C2S C13S C8S -91(10) . . . 3_766 ?
C16S C2S C13S C8S -32(6) 3_766 . . 3_766 ?
C3S C2S C13S C8S -85(10) . . . 3_766 ?
C8S C2S C13S C8S 3(20) . . . 3_766 ?
C10S C2S C13S C8S -31(7) . . . 3_766 ?
C16S C2S C13S C8S 24(6) . . . 3_766 ?
C15S C2S C13S C8S 83(5) . . . 3_766 ?
C7S C2S C13S C8S -76(5) . . . 3_766 ?
C4S C2S C13S C10S -174(9) . . . 3_766 ?
C9S C2S C13S C10S 39(10) . . . 3_766 ?
C14S C2S C13S C10S -125(15) . . . 3_766 ?
C16S C2S C13S C10S -67(11) 3_766 . . 3_766 ?
C3S C2S C13S C10S -119(11) . . . 3_766 ?
C8S C2S C13S C10S -32(14) . . . 3_766 ?
C10S C2S C13S C10S -65(14) . . . 3_766 ?
C8S C2S C13S C10S -35(11) 3_766 . . 3_766 ?
C16S C2S C13S C10S -10(8) . . . 3_766 ?
C15S C2S C13S C10S 48(9) . . . 3_766 ?
C7S C2S C13S C10S -111(10) . . . 3_766 ?
C16S C8S C13S C9S 102(11) 3_766 . . . ?
C10S C8S C13S C9S -40(21) 3_766 . . . ?
C14S C8S C13S C9S 159(12) . . . . ?
C16S C8S C13S C9S 34(9) . . . . ?
C2S C8S C13S C9S 62(15) . . . . ?
C12S C8S C13S C9S -30(11) 3_766 . . . ?
C6S C8S C13S C9S -33(7) . . . . ?
C2S C8S C13S C9S 66(14) 3_766 . . . ?
C9S C8S C13S C9S 88(10) 3_766 . . . ?
C8S C8S C13S C9S 65(9) 3_766 . . . ?
C16S C8S C13S C2S 39(19) 3_766 . . . ?
C10S C8S C13S C2S -103(19) 3_766 . . . ?
C14S C8S C13S C2S 97(18) . . . . ?
C9S C8S C13S C2S -62(15) . . . . ?
C16S C8S C13S C2S -28(18) . . . . ?
C12S C8S C13S C2S -92(15) 3_766 . . . ?
C6S C8S C13S C2S -95(15) . . . . ?
C2S C8S C13S C2S 3(25) 3_766 . . . ?
C9S C8S C13S C2S 25(21) 3_766 . . . ?
C8S C8S C13S C2S 2(19) 3_766 . . . ?
C16S C8S C13S C14S -58(9) 3_766 . . . ?
C10S C8S C13S C14S 160(20) 3_766 . . . ?
C9S C8S C13S C14S -159(12) . . . . ?
C16S C8S C13S C14S -125(10) . . . . ?
C2S C8S C13S C14S -97(18) . . . . ?
C12S C8S C13S C14S 171(11) 3_766 . . . ?
C6S C8S C13S C14S 168(9) . . . . ?
C2S C8S C13S C14S -93(13) 3_766 . . . ?
C9S C8S C13S C14S -72(10) 3_766 . . . ?
C8S C8S C13S C14S -94(9) 3_766 . . . ?
C10S C8S C13S C16S -142(24) 3_766 . . 3_766 ?
C14S C8S C13S C16S 58(9) . . . 3_766 ?
C9S C8S C13S C16S -102(11) . . . 3_766 ?
C16S C8S C13S C16S -67(8) . . . 3_766 ?
C2S C8S C13S C16S -39(19) . . . 3_766 ?
C12S C8S C13S C16S -132(14) 3_766 . . 3_766 ?
C6S C8S C13S C16S -135(9) . . . 3_766 ?
C2S C8S C13S C16S -36(10) 3_766 . . 3_766 ?
C9S C8S C13S C16S -14(6) 3_766 . . 3_766 ?
C8S C8S C13S C16S -37(6) 3_766 . . 3_766 ?
C16S C8S C13S C4S -23(26) 3_766 . . . ?
C10S C8S C13S C4S -165(13) 3_766 . . . ?
C14S C8S C13S C4S 34(21) . . . . ?
C9S C8S C13S C4S -125(25) . . . . ?
C16S C8S C13S C4S -90(25) . . . . ?
C2S C8S C13S C4S -62(18) . . . . ?
C12S C8S C13S C4S -155(18) 3_766 . . . ?
C6S C8S C13S C4S -158(22) . . . . ?
C2S C8S C13S C4S -59(31) 3_766 . . . ?
C9S C8S C13S C4S -37(28) 3_766 . . . ?
C8S C8S C13S C4S -60(26) 3_766 . . . ?
C16S C8S C13S C16S 67(8) 3_766 . . . ?
C10S C8S C13S C16S -75(22) 3_766 . . . ?
C14S C8S C13S C16S 125(10) . . . . ?
C9S C8S C13S C16S -34(9) . . . . ?
C2S C8S C13S C16S 28(18) . . . . ?
C12S C8S C13S C16S -64(11) 3_766 . . . ?
C6S C8S C13S C16S -67(7) . . . . ?
C2S C8S C13S C16S 31(9) 3_766 . . . ?
C9S C8S C13S C16S 53(6) 3_766 . . . ?
C8S C8S C13S C16S 30(4) 3_766 . . . ?
C16S C8S C13S C6S 135(9) 3_766 . . . ?
C10S C8S C13S C6S -7(17) 3_766 . . . ?
C14S C8S C13S C6S -168(9) . . . . ?
C9S C8S C13S C6S 33(7) . . . . ?
C16S C8S C13S C6S 67(7) . . . . ?
C2S C8S C13S C6S 95(15) . . . . ?
C12S C8S C13S C6S 3(7) 3_766 . . . ?
C2S C8S C13S C6S 99(13) 3_766 . . . ?
C9S C8S C13S C6S 121(9) 3_766 . . . ?
C8S C8S C13S C6S 98(8) 3_766 . . . ?
C16S C8S C13S C15S 115(9) 3_766 . . . ?
C10S C8S C13S C15S -27(20) 3_766 . . . ?
C14S C8S C13S C15S 172(9) . . . . ?
C9S C8S C13S C15S 13(6) . . . . ?
C16S C8S C13S C15S 48(7) . . . . ?
C2S C8S C13S C15S 76(15) . . . . ?
C12S C8S C13S C15S -17(9) 3_766 . . . ?
C6S C8S C13S C15S -20(4) . . . . ?
C2S C8S C13S C15S 79(12) 3_766 . . . ?
C9S C8S C13S C15S 101(8) 3_766 . . . ?
C8S C8S C13S C15S 78(7) 3_766 . . . ?
C16S C8S C13S C3S -2(14) 3_766 . . . ?
C10S C8S C13S C3S -144(14) 3_766 . . . ?
C14S C8S C13S C3S 55(11) . . . . ?
C9S C8S C13S C3S -104(12) . . . . ?
C16S C8S C13S C3S -69(13) . . . . ?
C2S C8S C13S C3S -41(11) . . . . ?
C12S C8S C13S C3S -134(8) 3_766 . . . ?
C6S C8S C13S C3S -137(9) . . . . ?
C2S C8S C13S C3S -38(19) 3_766 . . . ?
C9S C8S C13S C3S -16(15) 3_766 . . . ?
C8S C8S C13S C3S -39(14) 3_766 . . . ?
C16S C8S C13S C8S 37(6) 3_766 . . 3_766 ?
C10S C8S C13S C8S -105(23) 3_766 . . 3_766 ?
C14S C8S C13S C8S 94(9) . . . 3_766 ?
C9S C8S C13S C8S -65(9) . . . 3_766 ?
C16S C8S C13S C8S -30(4) . . . 3_766 ?
C2S C8S C13S C8S -2(19) . . . 3_766 ?
C12S C8S C13S C8S -95(12) 3_766 . . 3_766 ?
C6S C8S C13S C8S -98(8) . . . 3_766 ?
C2S C8S C13S C8S 1(6) 3_766 . . 3_766 ?
C9S C8S C13S C8S 23(3) 3_766 . . 3_766 ?
C16S C8S C13S C10S 142(24) 3_766 . . 3_766 ?
C14S C8S C13S C10S -160(20) . . . 3_766 ?
C9S C8S C13S C10S 40(20) . . . 3_766 ?
C16S C8S C13S C10S 75(22) . . . 3_766 ?
C2S C8S C13S C10S 103(19) . . . 3_766 ?
C12S C8S C13S C10S 10(13) 3_766 . . 3_766 ?
C6S C8S C13S C10S 7(17) . . . 3_766 ?
C2S C8S C13S C10S 106(28) 3_766 . . 3_766 ?
C9S C8S C13S C10S 128(25) 3_766 . . 3_766 ?
C8S C8S C13S C10S 105(23) 3_766 . . 3_766 ?
C2S C4S C13S C9S -31(8) . . . . ?
C3S C4S C13S C9S -89(11) . . . . ?
C14S C4S C13S C9S -160(13) . . . . ?
C7S C4S C13S C9S -126(8) . . . . ?
C16S C4S C13S C9S -103(10) 3_766 . . . ?
C5S C4S C13S C9S -106(8) . . . . ?
C10S C4S C13S C9S -76(8) . . . . ?
C8S C4S C13S C9S -124(27) . . . . ?
C17S C4S C13S C9S -142(8) . . . . ?
C8S C4S C13S C9S -67(8) 3_766 . . . ?
C3S C4S C13S C2S -58(10) . . . . ?
C14S C4S C13S C2S -129(11) . . . . ?
C9S C4S C13S C2S 31(8) . . . . ?
C7S C4S C13S C2S -94(8) . . . . ?
C16S C4S C13S C2S -72(9) 3_766 . . . ?
C5S C4S C13S C2S -75(8) . . . . ?
C10S C4S C13S C2S -45(7) . . . . ?
C8S C4S C13S C2S -92(25) . . . . ?
C17S C4S C13S C2S -111(8) . . . . ?
C8S C4S C13S C2S -36(7) 3_766 . . . ?
C2S C4S C13S C14S 129(11) . . . . ?
C3S C4S C13S C14S 70(10) . . . . ?
C9S C4S C13S C14S 160(13) . . . . ?
C7S C4S C13S C14S 34(8) . . . . ?
C16S C4S C13S C14S 57(8) 3_766 . . . ?
C5S C4S C13S C14S 54(8) . . . . ?
C10S C4S C13S C14S 83(8) . . . . ?
C8S C4S C13S C14S 36(22) . . . . ?
C17S C4S C13S C14S 17(7) . . . . ?
C8S C4S C13S C14S 93(8) 3_766 . . . ?
C2S C4S C13S C8S 92(25) . . . . ?
C3S C4S C13S C8S 34(26) . . . . ?
C14S C4S C13S C8S -36(22) . . . . ?
C9S C4S C13S C8S 124(27) . . . . ?
C7S C4S C13S C8S -2(24) . . . . ?
C16S C4S C13S C8S 21(23) 3_766 . . . ?
C5S C4S C13S C8S 17(25) . . . . ?
C10S C4S C13S C8S 47(24) . . . . ?
C17S C4S C13S C8S -19(24) . . . . ?
C8S C4S C13S C8S 56(25) 3_766 . . . ?
C2S C4S C13S C16S 72(9) . . . 3_766 ?
C3S C4S C13S C16S 14(11) . . . 3_766 ?
C14S C4S C13S C16S -57(8) . . . 3_766 ?
C9S C4S C13S C16S 103(10) . . . 3_766 ?
C7S C4S C13S C16S -23(7) . . . 3_766 ?
C5S C4S C13S C16S -3(7) . . . 3_766 ?
C10S C4S C13S C16S 27(7) . . . 3_766 ?
C8S C4S C13S C16S -21(23) . . . 3_766 ?
C17S C4S C13S C16S -39(6) . . . 3_766 ?
C8S C4S C13S C16S 36(6) 3_766 . . 3_766 ?
C2S C4S C13S C16S 20(7) . . . . ?
C3S C4S C13S C16S -38(11) . . . . ?
C14S C4S C13S C16S -109(11) . . . . ?
C9S C4S C13S C16S 51(8) . . . . ?
C7S C4S C13S C16S -75(8) . . . . ?
C16S C4S C13S C16S -52(9) 3_766 . . . ?
C5S C4S C13S C16S -55(8) . . . . ?
C10S C4S C13S C16S -25(7) . . . . ?
C8S C4S C13S C16S -73(24) . . . . ?
C17S C4S C13S C16S -91(7) . . . . ?
C8S C4S C13S C16S -16(6) 3_766 . . . ?
C2S C4S C13S C6S -59(9) . . . . ?
C3S C4S C13S C6S -117(10) . . . . ?
C14S C4S C13S C6S 172(12) . . . . ?
C9S C4S C13S C6S -28(6) . . . . ?
C7S C4S C13S C6S -154(7) . . . . ?
C16S C4S C13S C6S -131(10) 3_766 . . . ?
C5S C4S C13S C6S -134(6) . . . . ?
C10S C4S C13S C6S -104(7) . . . . ?
C8S C4S C13S C6S -152(27) . . . . ?
C17S C4S C13S C6S -170(7) . . . . ?
C8S C4S C13S C6S -95(7) 3_766 . . . ?
C2S C4S C13S C15S -43(7) . . . . ?
C3S C4S C13S C15S -102(9) . . . . ?
C14S C4S C13S C15S -172(10) . . . . ?
C9S C4S C13S C15S -12(7) . . . . ?
C7S C4S C13S C15S -138(5) . . . . ?
C16S C4S C13S C15S -115(8) 3_766 . . . ?
C5S C4S C13S C15S -118(5) . . . . ?
C10S C4S C13S C15S -89(5) . . . . ?
C8S C4S C13S C15S -136(25) . . . . ?
C17S C4S C13S C15S -155(5) . . . . ?
C8S C4S C13S C15S -80(5) 3_766 . . . ?
C2S C4S C13S C3S 58(10) . . . . ?
C14S C4S C13S C3S -70(10) . . . . ?
C9S C4S C13S C3S 89(11) . . . . ?
C7S C4S C13S C3S -36(8) . . . . ?
C16S C4S C13S C3S -14(11) 3_766 . . . ?
C5S C4S C13S C3S -17(8) . . . . ?
C10S C4S C13S C3S 13(8) . . . . ?
C8S C4S C13S C3S -34(26) . . . . ?
C17S C4S C13S C3S -53(8) . . . . ?
C8S C4S C13S C3S 22(9) 3_766 . . . ?
C2S C4S C13S C8S 36(7) . . . 3_766 ?
C3S C4S C13S C8S -22(9) . . . 3_766 ?
C14S C4S C13S C8S -93(8) . . . 3_766 ?
C9S C4S C13S C8S 67(8) . . . 3_766 ?
C7S C4S C13S C8S -58(5) . . . 3_766 ?
C16S C4S C13S C8S -36(6) 3_766 . . 3_766 ?
C5S C4S C13S C8S -39(5) . . . 3_766 ?
C10S C4S C13S C8S -9(5) . . . 3_766 ?
C8S C4S C13S C8S -56(25) . . . 3_766 ?
C17S C4S C13S C8S -75(4) . . . 3_766 ?
C2S C4S C13S C10S 37(47) . . . 3_766 ?
C3S C4S C13S C10S -21(52) . . . 3_766 ?
C14S C4S C13S C10S -91(49) . . . 3_766 ?
C9S C4S C13S C10S 68(47) . . . 3_766 ?
C7S C4S C13S C10S -57(49) . . . 3_766 ?
C16S C4S C13S C10S -34(47) 3_766 . . 3_766 ?
C5S C4S C13S C10S -38(50) . . . 3_766 ?
C10S C4S C13S C10S -8(50) . . . 3_766 ?
C8S C4S C13S C10S -55(49) . . . 3_766 ?
C17S C4S C13S C10S -74(49) . . . 3_766 ?
C8S C4S C13S C10S 1(47) 3_766 . . 3_766 ?
C15S C6S C13S C9S -13(11) . . . . ?
C1S C6S C13S C9S 71(20) 3_766 . . . ?
C12S C6S C13S C9S 118(11) 3_766 . . . ?
C18S C6S C13S C9S 92(13) . . . . ?
C11S C6S C13S C9S 41(13) . . . . ?
C10S C6S C13S C9S 125(10) 3_766 . . . ?
C16S C6S C13S C9S 65(10) . . . . ?
C8S C6S C13S C9S 122(13) . . . . ?
C7S C6S C13S C9S 79(10) 3_766 . . . ?
C5S C6S C13S C9S 103(10) 3_766 . . . ?
C15S C6S C13S C2S 2(10) . . . . ?
C1S C6S C13S C2S 86(19) 3_766 . . . ?
C12S C6S C13S C2S 132(10) 3_766 . . . ?
C9S C6S C13S C2S 15(7) . . . . ?
C18S C6S C13S C2S 107(12) . . . . ?
C11S C6S C13S C2S 55(12) . . . . ?
C10S C6S C13S C2S 140(8) 3_766 . . . ?
C16S C6S C13S C2S 80(8) . . . . ?
C8S C6S C13S C2S 136(12) . . . . ?
C7S C6S C13S C2S 94(9) 3_766 . . . ?
C5S C6S C13S C2S 117(8) 3_766 . . . ?
C15S C6S C13S C14S -165(24) . . . . ?
C1S C6S C13S C14S -81(29) 3_766 . . . ?
C12S C6S C13S C14S -34(23) 3_766 . . . ?
C9S C6S C13S C14S -152(28) . . . . ?
C18S C6S C13S C14S -60(25) . . . . ?
C11S C6S C13S C14S -111(23) . . . . ?
C10S C6S C13S C14S -27(22) 3_766 . . . ?
C16S C6S C13S C14S -87(23) . . . . ?
C8S C6S C13S C14S -30(21) . . . . ?
C7S C6S C13S C14S -72(23) 3_766 . . . ?
C5S C6S C13S C14S -49(23) 3_766 . . . ?
C15S C6S C13S C8S -135(10) . . . . ?
C1S C6S C13S C8S -51(19) 3_766 . . . ?
C12S C6S C13S C8S -4(9) 3_766 . . . ?
C9S C6S C13S C8S -122(13) . . . . ?
C18S C6S C13S C8S -30(12) . . . . ?
C11S C6S C13S C8S -81(11) . . . . ?
C10S C6S C13S C8S 3(8) 3_766 . . . ?
C16S C6S C13S C8S -57(7) . . . . ?
C7S C6S C13S C8S -42(8) 3_766 . . . ?
C5S C6S C13S C8S -19(8) 3_766 . . . ?
C15S C6S C13S C16S -89(9) . . . 3_766 ?
C1S C6S C13S C16S -5(20) 3_766 . . 3_766 ?
C12S C6S C13S C16S 41(9) 3_766 . . 3_766 ?
C9S C6S C13S C16S -76(11) . . . 3_766 ?
C18S C6S C13S C16S 16(12) . . . 3_766 ?
C11S C6S C13S C16S -36(11) . . . 3_766 ?
C10S C6S C13S C16S 49(7) 3_766 . . 3_766 ?
C16S C6S C13S C16S -11(10) . . . 3_766 ?
C8S C6S C13S C16S 45(10) . . . 3_766 ?
C7S C6S C13S C16S 3(8) 3_766 . . 3_766 ?
C5S C6S C13S C16S 26(8) 3_766 . . 3_766 ?
C15S C6S C13S C4S 33(9) . . . . ?
C1S C6S C13S C4S 117(18) 3_766 . . . ?
C12S C6S C13S C4S 164(9) 3_766 . . . ?
C9S C6S C13S C4S 46(8) . . . . ?
C18S C6S C13S C4S 139(11) . . . . ?
C11S C6S C13S C4S 87(11) . . . . ?
C10S C6S C13S C4S 172(8) 3_766 . . . ?
C16S C6S C13S C4S 111(7) . . . . ?
C8S C6S C13S C4S 168(11) . . . . ?
C7S C6S C13S C4S 126(8) 3_766 . . . ?
C5S C6S C13S C4S 149(7) 3_766 . . . ?
C15S C6S C13S C16S -78(8) . . . . ?
C1S C6S C13S C16S 6(17) 3_766 . . . ?
C12S C6S C13S C16S 53(7) 3_766 . . . ?
C9S C6S C13S C16S -65(10) . . . . ?
C18S C6S C13S C16S 27(10) . . . . ?
C11S C6S C13S C16S -24(9) . . . . ?
C10S C6S C13S C16S 60(5) 3_766 . . . ?
C8S C6S C13S C16S 57(7) . . . . ?
C7S C6S C13S C16S 14(5) 3_766 . . . ?
C5S C6S C13S C16S 38(5) 3_766 . . . ?
C1S C6S C13S C15S 84(17) 3_766 . . . ?
C12S C6S C13S C15S 131(10) 3_766 . . . ?
C9S C6S C13S C15S 13(12) . . . . ?
C18S C6S C13S C15S 105(11) . . . . ?
C11S C6S C13S C15S 54(9) . . . . ?
C10S C6S C13S C15S 138(8) 3_766 . . . ?
C16S C6S C13S C15S 78(8) . . . . ?
C8S C6S C13S C15S 135(10) . . . . ?
C7S C6S C13S C15S 92(8) 3_766 . . . ?
C5S C6S C13S C15S 116(8) 3_766 . . . ?
C15S C6S C13S C3S -8(10) . . . . ?
C1S C6S C13S C3S 76(19) 3_766 . . . ?
C12S C6S C13S C3S 123(9) 3_766 . . . ?
C9S C6S C13S C3S 5(8) . . . . ?
C18S C6S C13S C3S 98(12) . . . . ?
C11S C6S C13S C3S 46(12) . . . . ?
C10S C6S C13S C3S 131(8) 3_766 . . . ?
C16S C6S C13S C3S 70(8) . . . . ?
C8S C6S C13S C3S 127(11) . . . . ?
C7S C6S C13S C3S 85(8) 3_766 . . . ?
C5S C6S C13S C3S 108(8) 3_766 . . . ?
C15S C6S C13S C8S -63(7) . . . 3_766 ?
C1S C6S C13S C8S 21(18) 3_766 . . 3_766 ?
C12S C6S C13S C8S 68(7) 3_766 . . 3_766 ?
C9S C6S C13S C8S -50(9) . . . 3_766 ?
C18S C6S C13S C8S 43(10) . . . 3_766 ?
C11S C6S C13S C8S -9(9) . . . 3_766 ?
C10S C6S C13S C8S 76(4) 3_766 . . 3_766 ?
C16S C6S C13S C8S 15(4) . . . 3_766 ?
C8S C6S C13S C8S 72(7) . . . 3_766 ?
C7S C6S C13S C8S 30(5) 3_766 . . 3_766 ?
C5S C6S C13S C8S 53(4) 3_766 . . 3_766 ?
C15S C6S C13S C10S -138(8) . . . 3_766 ?
C1S C6S C13S C10S -54(17) 3_766 . . 3_766 ?
C12S C6S C13S C10S -8(6) 3_766 . . 3_766 ?
C9S C6S C13S C10S -125(10) . . . 3_766 ?
C18S C6S C13S C10S -33(9) . . . 3_766 ?
C11S C6S C13S C10S -85(8) . . . 3_766 ?
C16S C6S C13S C10S -60(5) . . . 3_766 ?
C8S C6S C13S C10S -3(8) . . . 3_766 ?
C7S C6S C13S C10S -46(4) 3_766 . . 3_766 ?
C5S C6S C13S C10S -22(4) 3_766 . . 3_766 ?
C5S C3S C13S C9S -122(12) . . . . ?
C4S C3S C13S C9S 95(11) . . . . ?
C7S C3S C13S C9S -145(10) . . . . ?
C10S C3S C13S C9S -63(10) . . . . ?
C2S C3S C13S C9S 20(9) . . . . ?
C18S C3S C13S C9S -125(10) 3_766 . . . ?
C14S C3S C13S C9S -166(14) . . . . ?
C12S C3S C13S C9S -94(9) . . . . ?
C16S C3S C13S C9S -99(10) 3_766 . . . ?
C17S C3S C13S C9S -150(9) . . . . ?
C8S C3S C13S C9S -60(8) 3_766 . . . ?
C5S C3S C13S C2S -143(17) . . . . ?
C4S C3S C13S C2S 75(12) . . . . ?
C7S C3S C13S C2S -166(15) . . . . ?
C10S C3S C13S C2S -83(13) . . . . ?
C18S C3S C13S C2S -146(15) 3_766 . . . ?
C14S C3S C13S C2S 173(17) . . . . ?
C12S C3S C13S C2S -115(13) . . . . ?
C16S C3S C13S C2S -120(15) 3_766 . . . ?
C17S C3S C13S C2S -171(13) . . . . ?
C8S C3S C13S C2S -81(12) 3_766 . . . ?
C5S C3S C13S C14S 44(13) . . . . ?
C4S C3S C13S C14S -98(12) . . . . ?
C7S C3S C13S C14S 21(10) . . . . ?
C10S C3S C13S C14S 103(11) . . . . ?
C2S C3S C13S C14S -173(17) . . . . ?
C18S C3S C13S C14S 41(11) 3_766 . . . ?
C12S C3S C13S C14S 72(10) . . . . ?
C16S C3S C13S C14S 67(8) 3_766 . . . ?
C17S C3S C13S C14S 16(8) . . . . ?
C8S C3S C13S C14S 106(9) 3_766 . . . ?
C5S C3S C13S C8S -20(18) . . . . ?
C4S C3S C13S C8S -163(14) . . . . ?
C7S C3S C13S C8S -44(15) . . . . ?
C10S C3S C13S C8S 39(15) . . . . ?
C2S C3S C13S C8S 122(18) . . . . ?
C18S C3S C13S C8S -23(15) 3_766 . . . ?
C14S C3S C13S C8S -65(13) . . . . ?
C12S C3S C13S C8S 8(14) . . . . ?
C16S C3S C13S C8S 2(14) 3_766 . . . ?
C17S C3S C13S C8S -49(13) . . . . ?
C8S C3S C13S C8S 41(15) 3_766 . . . ?
C5S C3S C13S C16S -23(11) . . . 3_766 ?
C4S C3S C13S C16S -165(12) . . . 3_766 ?
C7S C3S C13S C16S -46(8) . . . 3_766 ?
C10S C3S C13S C16S 37(8) . . . 3_766 ?
C2S C3S C13S C16S 120(15) . . . 3_766 ?
C18S C3S C13S C16S -26(9) 3_766 . . 3_766 ?
C14S C3S C13S C16S -67(8) . . . 3_766 ?
C12S C3S C13S C16S 5(7) . . . 3_766 ?
C17S C3S C13S C16S -51(6) . . . 3_766 ?
C8S C3S C13S C16S 39(6) 3_766 . . 3_766 ?
C5S C3S C13S C4S 142(16) . . . . ?
C7S C3S C13S C4S 119(12) . . . . ?
C10S C3S C13S C4S -158(13) . . . . ?
C2S C3S C13S C4S -75(12) . . . . ?
C18S C3S C13S C4S 139(13) 3_766 . . . ?
C14S C3S C13S C4S 98(12) . . . . ?
C12S C3S C13S C4S 170(12) . . . . ?
C16S C3S C13S C4S 165(12) 3_766 . . . ?
C17S C3S C13S C4S 114(10) . . . . ?
C8S C3S C13S C4S -156(10) 3_766 . . . ?
C5S C3S C13S C16S -69(11) . . . . ?
C4S C3S C13S C16S 149(9) . . . . ?
C7S C3S C13S C16S -92(8) . . . . ?
C10S C3S C13S C16S -10(8) . . . . ?
C2S C3S C13S C16S 74(11) . . . . ?
C18S C3S C13S C16S -72(8) 3_766 . . . ?
C14S C3S C13S C16S -113(10) . . . . ?
C12S C3S C13S C16S -41(7) . . . . ?
C16S C3S C13S C16S -46(9) 3_766 . . . ?
C17S C3S C13S C16S -97(6) . . . . ?
C8S C3S C13S C16S -7(5) 3_766 . . . ?
C5S C3S C13S C6S -126(10) . . . . ?
C4S C3S C13S C6S 92(11) . . . . ?
C7S C3S C13S C6S -149(8) . . . . ?
C10S C3S C13S C6S -66(9) . . . . ?
C2S C3S C13S C6S 17(10) . . . . ?
C18S C3S C13S C6S -129(8) 3_766 . . . ?
C14S C3S C13S C6S -170(13) . . . . ?
C12S C3S C13S C6S -98(8) . . . . ?
C16S C3S C13S C6S -103(10) 3_766 . . . ?
C17S C3S C13S C6S -154(7) . . . . ?
C8S C3S C13S C6S -64(7) 3_766 . . . ?
C5S C3S C13S C15S -129(10) . . . . ?
C4S C3S C13S C15S 88(9) . . . . ?
C7S C3S C13S C15S -152(8) . . . . ?
C10S C3S C13S C15S -70(8) . . . . ?
C2S C3S C13S C15S 13(10) . . . . ?
C18S C3S C13S C15S -132(8) 3_766 . . . ?
C14S C3S C13S C15S -173(11) . . . . ?
C12S C3S C13S C15S -101(6) . . . . ?
C16S C3S C13S C15S -107(8) 3_766 . . . ?
C17S C3S C13S C15S -158(6) . . . . ?
C8S C3S C13S C15S -68(5) 3_766 . . . ?
C5S C3S C13S C8S -62(10) . . . 3_766 ?
C4S C3S C13S C8S 156(10) . . . 3_766 ?
C7S C3S C13S C8S -85(7) . . . 3_766 ?
C10S C3S C13S C8S -3(7) . . . 3_766 ?
C2S C3S C13S C8S 81(12) . . . 3_766 ?
C18S C3S C13S C8S -65(7) 3_766 . . 3_766 ?
C14S C3S C13S C8S -106(9) . . . 3_766 ?
C12S C3S C13S C8S -34(6) . . . 3_766 ?
C16S C3S C13S C8S -39(6) 3_766 . . 3_766 ?
C17S C3S C13S C8S -90(5) . . . 3_766 ?
C5S C3S C13S C10S -41(16) . . . 3_766 ?
C4S C3S C13S C10S 176(9) . . . 3_766 ?
C7S C3S C13S C10S -65(12) . . . 3_766 ?
C10S C3S C13S C10S 18(14) . . . 3_766 ?
C2S C3S C13S C10S 101(14) . . . 3_766 ?
C18S C3S C13S C10S -44(12) 3_766 . . 3_766 ?
C14S C3S C13S C10S -86(10) . . . 3_766 ?
C12S C3S C13S C10S -13(12) . . . 3_766 ?
C16S C3S C13S C10S -19(9) 3_766 . . 3_766 ?
C17S C3S C13S C10S -70(9) . . . 3_766 ?
C8S C3S C13S C10S 20(8) 3_766 . . 3_766 ?
C9S C13S C14S C16S -32(38) . . . 3_766 ?
C2S C13S C14S C16S -78(9) . . . 3_766 ?
C8S C13S C14S C16S 61(9) . . . 3_766 ?
C4S C13S C14S C16S -105(6) . . . 3_766 ?
C16S C13S C14S C16S 15(11) . . . 3_766 ?
C6S C13S C14S C16S 89(22) . . . 3_766 ?
C15S C13S C14S C16S -20(77) . . . 3_766 ?
C3S C13S C14S C16S -74(6) . . . 3_766 ?
C8S C13S C14S C16S -13(7) 3_766 . . 3_766 ?
C10S C13S C14S C16S 68(7) 3_766 . . 3_766 ?
C9S C13S C14S C2S 46(32) . . . . ?
C8S C13S C14S C2S 139(11) . . . . ?
C16S C13S C14S C2S 78(9) 3_766 . . . ?
C4S C13S C14S C2S -27(6) . . . . ?
C16S C13S C14S C2S 93(10) . . . . ?
C6S C13S C14S C2S 167(27) . . . . ?
C15S C13S C14S C2S 57(72) . . . . ?
C3S C13S C14S C2S 3(9) . . . . ?
C8S C13S C14S C2S 65(7) 3_766 . . . ?
C10S C13S C14S C2S 146(11) 3_766 . . . ?
C9S C13S C14S C4S 73(36) . . . . ?
C2S C13S C14S C4S 27(6) . . . . ?
C8S C13S C14S C4S 166(7) . . . . ?
C16S C13S C14S C4S 105(6) 3_766 . . . ?
C16S C13S C14S C4S 120(7) . . . . ?
C6S C13S C14S C4S -166(22) . . . . ?
C15S C13S C14S C4S 85(75) . . . . ?
C3S C13S C14S C4S 31(4) . . . . ?
C8S C13S C14S C4S 92(4) 3_766 . . . ?
C10S C13S C14S C4S 173(6) 3_766 . . . ?
C9S C13S C14S C8S -93(38) . . . . ?
C2S C13S C14S C8S -139(11) . . . . ?
C16S C13S C14S C8S -61(9) 3_766 . . . ?
C4S C13S C14S C8S -166(7) . . . . ?
C16S C13S C14S C8S -46(8) . . . . ?
C6S C13S C14S C8S 28(20) . . . . ?
C15S C13S C14S C8S -81(76) . . . . ?
C3S C13S C14S C8S -135(7) . . . . ?
C8S C13S C14S C8S -74(5) 3_766 . . . ?
C10S C13S C14S C8S 7(6) 3_766 . . . ?
C2S C13S C14S C9S -46(32) . . . . ?
C8S C13S C14S C9S 93(38) . . . . ?
C16S C13S C14S C9S 32(38) 3_766 . . . ?
C4S C13S C14S C9S -73(36) . . . . ?
C16S C13S C14S C9S 47(34) . . . . ?
C6S C13S C14S C9S 121(52) . . . . ?
C15S C13S C14S C9S 12(47) . . . . ?
C3S C13S C14S C9S -42(38) . . . . ?
C8S C13S C14S C9S 19(35) 3_766 . . . ?
C10S C13S C14S C9S 100(38) 3_766 . . . ?
C9S C13S C14S C7S 23(44) . . . . ?
C2S C13S C14S C7S -23(15) . . . . ?
C8S C13S C14S C7S 116(11) . . . . ?
C16S C13S C14S C7S 55(10) 3_766 . . . ?
C4S C13S C14S C7S -50(11) . . . . ?
C16S C13S C14S C7S 70(14) . . . . ?
C6S C13S C14S C7S 144(16) . . . . ?
C15S C13S C14S C7S 35(83) . . . . ?
C3S C13S C14S C7S -19(9) . . . . ?
C8S C13S C14S C7S 42(11) 3_766 . . . ?
C10S C13S C14S C7S 123(9) 3_766 . . . ?
C9S C13S C14S C17S -9(57) . . . . ?
C2S C13S C14S C17S -55(28) . . . . ?
C8S C13S C14S C17S 84(25) . . . . ?
C16S C13S C14S C17S 23(23) 3_766 . . . ?
C4S C13S C14S C17S -82(25) . . . . ?
C16S C13S C14S C17S 38(29) . . . . ?
C6S C13S C14S C17S 112(25) . . . . ?
C15S C13S C14S C17S 2(98) . . . . ?
C3S C13S C14S C17S -52(24) . . . . ?
C8S C13S C14S C17S 10(26) 3_766 . . . ?
C10S C13S C14S C17S 91(25) 3_766 . . . ?
C9S C13S C14S C3S 42(38) . . . . ?
C2S C13S C14S C3S -3(9) . . . . ?
C8S C13S C14S C3S 135(7) . . . . ?
C16S C13S C14S C3S 74(6) 3_766 . . . ?
C4S C13S C14S C3S -31(4) . . . . ?
C16S C13S C14S C3S 90(8) . . . . ?
C6S C13S C14S C3S 163(20) . . . . ?
C15S C13S C14S C3S 54(76) . . . . ?
C8S C13S C14S C3S 62(5) 3_766 . . . ?
C10S C13S C14S C3S 142(5) 3_766 . . . ?
C9S C13S C14S C5S 24(40) . . . . ?
C2S C13S C14S C5S -21(11) . . . . ?
C8S C13S C14S C5S 117(7) . . . . ?
C16S C13S C14S C5S 56(6) 3_766 . . . ?
C4S C13S C14S C5S -49(6) . . . . ?
C16S C13S C14S C5S 72(10) . . . . ?
C6S C13S C14S C5S 145(18) . . . . ?
C15S C13S C14S C5S 36(79) . . . . ?
C3S C13S C14S C5S -18(4) . . . . ?
C8S C13S C14S C5S 44(7) 3_766 . . . ?
C10S C13S C14S C5S 124(5) 3_766 . . . ?
C9S C13S C14S C16S -47(34) . . . . ?
C2S C13S C14S C16S -93(10) . . . . ?
C8S C13S C14S C16S 46(8) . . . . ?
C16S C13S C14S C16S -15(11) 3_766 . . . ?
C4S C13S C14S C16S -120(7) . . . . ?
C6S C13S C14S C16S 74(21) . . . . ?
C15S C13S C14S C16S -36(71) . . . . ?
C3S C13S C14S C16S -90(8) . . . . ?
C8S C13S C14S C16S -28(6) 3_766 . . . ?
C10S C13S C14S C16S 53(7) 3_766 . . . ?
C9S C13S C14S C8S -19(35) . . . 3_766 ?
C2S C13S C14S C8S -65(7) . . . 3_766 ?
C8S C13S C14S C8S 74(5) . . . 3_766 ?
C16S C13S C14S C8S 13(7) 3_766 . . 3_766 ?
C4S C13S C14S C8S -92(4) . . . 3_766 ?
C16S C13S C14S C8S 28(6) . . . 3_766 ?
C6S C13S C14S C8S 102(22) . . . 3_766 ?
C15S C13S C14S C8S -7(74) . . . 3_766 ?
C3S C13S C14S C8S -62(5) . . . 3_766 ?
C10S C13S C14S C8S 81(6) 3_766 . . 3_766 ?
C4S C2S C14S C13S 133(12) . . . . ?
C9S C2S C14S C13S -13(11) . . . . ?
C16S C2S C14S C13S -92(10) 3_766 . . . ?
C3S C2S C14S C13S -176(12) . . . . ?
C8S C2S C14S C13S -31(10) . . . . ?
C10S C2S C14S C13S -134(11) . . . . ?
C8S C2S C14S C13S -92(11) 3_766 . . . ?
C16S C2S C14S C13S -55(11) . . . . ?
C15S C2S C14S C13S -7(11) . . . . ?
C7S C2S C14S C13S -162(12) . . . . ?
C13S C2S C14S C16S 92(10) . . . 3_766 ?
C4S C2S C14S C16S -135(8) . . . 3_766 ?
C9S C2S C14S C16S 79(7) . . . 3_766 ?
C3S C2S C14S C16S -83(7) . . . 3_766 ?
C8S C2S C14S C16S 61(7) . . . 3_766 ?
C10S C2S C14S C16S -41(7) . . . 3_766 ?
C8S C2S C14S C16S 0(7) 3_766 . . 3_766 ?
C16S C2S C14S C16S 37(8) . . . 3_766 ?
C15S C2S C14S C16S 85(7) . . . 3_766 ?
C7S C2S C14S C16S -70(6) . . . 3_766 ?
C13S C2S C14S C4S -133(12) . . . . ?
C9S C2S C14S C4S -146(8) . . . . ?
C16S C2S C14S C4S 135(8) 3_766 . . . ?
C3S C2S C14S C4S 52(5) . . . . ?
C8S C2S C14S C4S -164(8) . . . . ?
C10S C2S C14S C4S 94(6) . . . . ?
C8S C2S C14S C4S 135(6) 3_766 . . . ?
C16S C2S C14S C4S 172(6) . . . . ?
C15S C2S C14S C4S -140(7) . . . . ?
C7S C2S C14S C4S 66(6) . . . . ?
C13S C2S C14S C8S 31(10) . . . . ?
C4S C2S C14S C8S 164(8) . . . . ?
C9S C2S C14S C8S 18(8) . . . . ?
C16S C2S C14S C8S -61(7) 3_766 . . . ?
C3S C2S C14S C8S -144(7) . . . . ?
C10S C2S C14S C8S -102(7) . . . . ?
C8S C2S C14S C8S -61(6) 3_766 . . . ?
C16S C2S C14S C8S -24(6) . . . . ?
C15S C2S C14S C8S 24(8) . . . . ?
C7S C2S C14S C8S -130(8) . . . . ?
C13S C2S C14S C9S 13(11) . . . . ?
C4S C2S C14S C9S 146(8) . . . . ?
C16S C2S C14S C9S -79(7) 3_766 . . . ?
C3S C2S C14S C9S -163(7) . . . . ?
C8S C2S C14S C9S -18(8) . . . . ?
C10S C2S C14S C9S -121(7) . . . . ?
C8S C2S C14S C9S -79(6) 3_766 . . . ?
C16S C2S C14S C9S -42(6) . . . . ?
C15S C2S C14S C9S 6(6) . . . . ?
C7S C2S C14S C9S -149(6) . . . . ?
C13S C2S C14S C7S 162(12) . . . . ?
C4S C2S C14S C7S -66(6) . . . . ?
C9S C2S C14S C7S 149(6) . . . . ?
C16S C2S C14S C7S 70(6) 3_766 . . . ?
C3S C2S C14S C7S -14(6) . . . . ?
C8S C2S C14S C7S 130(8) . . . . ?
C10S C2S C14S C7S 28(6) . . . . ?
C8S C2S C14S C7S 70(5) 3_766 . . . ?
C16S C2S C14S C7S 107(6) . . . . ?
C15S C2S C14S C7S 154(6) . . . . ?
C13S C2S C14S C17S 156(13) . . . . ?
C4S C2S C14S C17S -71(8) . . . . ?
C9S C2S C14S C17S 143(8) . . . . ?
C16S C2S C14S C17S 64(8) 3_766 . . . ?
C3S C2S C14S C17S -20(9) . . . . ?
C8S C2S C14S C17S 125(10) . . . . ?
C10S C2S C14S C17S 22(8) . . . . ?
C8S C2S C14S C17S 64(8) 3_766 . . . ?
C16S C2S C14S C17S 101(8) . . . . ?
C15S C2S C14S C17S 149(6) . . . . ?
C7S C2S C14S C17S -6(7) . . . . ?
C13S C2S C14S C3S 176(12) . . . . ?
C4S C2S C14S C3S -52(5) . . . . ?
C9S C2S C14S C3S 163(7) . . . . ?
C16S C2S C14S C3S 83(7) 3_766 . . . ?
C8S C2S C14S C3S 144(7) . . . . ?
C10S C2S C14S C3S 42(5) . . . . ?
C8S C2S C14S C3S 83(5) 3_766 . . . ?
C16S C2S C14S C3S 120(6) . . . . ?
C15S C2S C14S C3S 168(7) . . . . ?
C7S C2S C14S C3S 14(6) . . . . ?
C13S C2S C14S C5S 159(11) . . . . ?
C4S C2S C14S C5S -68(5) . . . . ?
C9S C2S C14S C5S 146(6) . . . . ?
C16S C2S C14S C5S 67(6) 3_766 . . . ?
C3S C2S C14S C5S -17(4) . . . . ?
C8S C2S C14S C5S 128(6) . . . . ?
C10S C2S C14S C5S 25(4) . . . . ?
C8S C2S C14S C5S 67(4) 3_766 . . . ?
C16S C2S C14S C5S 104(4) . . . . ?
C15S C2S C14S C5S 152(5) . . . . ?
C7S C2S C14S C5S -3(5) . . . . ?
C13S C2S C14S C16S 55(11) . . . . ?
C4S C2S C14S C16S -172(6) . . . . ?
C9S C2S C14S C16S 42(6) . . . . ?
C16S C2S C14S C16S -37(8) 3_766 . . . ?
C3S C2S C14S C16S -120(6) . . . . ?
C8S C2S C14S C16S 24(6) . . . . ?
C10S C2S C14S C16S -78(5) . . . . ?
C8S C2S C14S C16S -37(4) 3_766 . . . ?
C15S C2S C14S C16S 48(6) . . . . ?
C7S C2S C14S C16S -107(6) . . . . ?
C13S C2S C14S C8S 92(11) . . . 3_766 ?
C4S C2S C14S C8S -135(6) . . . 3_766 ?
C9S C2S C14S C8S 79(6) . . . 3_766 ?
C16S C2S C14S C8S 0(7) 3_766 . . 3_766 ?
C3S C2S C14S C8S -83(5) . . . 3_766 ?
C8S C2S C14S C8S 61(6) . . . 3_766 ?
C10S C2S C14S C8S -42(5) . . . 3_766 ?
C16S C2S C14S C8S 37(4) . . . 3_766 ?
C15S C2S C14S C8S 85(6) . . . 3_766 ?
C7S C2S C14S C8S -70(5) . . . 3_766 ?
C2S C4S C14S C13S -31(7) . . . . ?
C3S C4S C14S C13S -121(10) . . . . ?
C9S C4S C14S C13S -11(7) . . . . ?
C7S C4S C14S C13S -140(8) . . . . ?
C16S C4S C14S C13S -74(7) 3_766 . . . ?
C5S C4S C14S C13S -128(8) . . . . ?
C10S C4S C14S C13S -94(8) . . . . ?
C8S C4S C14S C13S -12(7) . . . . ?
C17S C4S C14S C13S -154(10) . . . . ?
C8S C4S C14S C13S -66(7) 3_766 . . . ?
C2S C4S C14S C16S 43(8) . . . 3_766 ?
C3S C4S C14S C16S -47(11) . . . 3_766 ?
C13S C4S C14S C16S 74(7) . . . 3_766 ?
C9S C4S C14S C16S 63(7) . . . 3_766 ?
C7S C4S C14S C16S -66(7) . . . 3_766 ?
C5S C4S C14S C16S -54(8) . . . 3_766 ?
C10S C4S C14S C16S -20(8) . . . 3_766 ?
C8S C4S C14S C16S 62(8) . . . 3_766 ?
C17S C4S C14S C16S -80(8) . . . 3_766 ?
C8S C4S C14S C16S 8(7) 3_766 . . 3_766 ?
C3S C4S C14S C2S -91(8) . . . . ?
C13S C4S C14S C2S 31(7) . . . . ?
C9S C4S C14S C2S 20(5) . . . . ?
C7S C4S C14S C2S -109(6) . . . . ?
C16S C4S C14S C2S -43(8) 3_766 . . . ?
C5S C4S C14S C2S -97(5) . . . . ?
C10S C4S C14S C2S -64(5) . . . . ?
C8S C4S C14S C2S 18(9) . . . . ?
C17S C4S C14S C2S -124(7) . . . . ?
C8S C4S C14S C2S -36(5) 3_766 . . . ?
C2S C4S C14S C8S -18(9) . . . . ?
C3S C4S C14S C8S -109(11) . . . . ?
C13S C4S C14S C8S 12(7) . . . . ?
C9S C4S C14S C8S 2(8) . . . . ?
C7S C4S C14S C8S -127(9) . . . . ?
C16S C4S C14S C8S -62(8) 3_766 . . . ?
C5S C4S C14S C8S -115(8) . . . . ?
C10S C4S C14S C8S -82(8) . . . . ?
C17S C4S C14S C8S -142(10) . . . . ?
C8S C4S C14S C8S -54(7) 3_766 . . . ?
C2S C4S C14S C9S -20(5) . . . . ?
C3S C4S C14S C9S -111(8) . . . . ?
C13S C4S C14S C9S 11(7) . . . . ?
C7S C4S C14S C9S -129(5) . . . . ?
C16S C4S C14S C9S -63(7) 3_766 . . . ?
C5S C4S C14S C9S -117(4) . . . . ?
C10S C4S C14S C9S -84(4) . . . . ?
C8S C4S C14S C9S -2(8) . . . . ?
C17S C4S C14S C9S -144(6) . . . . ?
C8S C4S C14S C9S -56(4) 3_766 . . . ?
C2S C4S C14S C7S 109(6) . . . . ?
C3S C4S C14S C7S 19(9) . . . . ?
C13S C4S C14S C7S 140(8) . . . . ?
C9S C4S C14S C7S 129(5) . . . . ?
C16S C4S C14S C7S 66(7) 3_766 . . . ?
C5S C4S C14S C7S 12(4) . . . . ?
C10S C4S C14S C7S 46(5) . . . . ?
C8S C4S C14S C7S 127(9) . . . . ?
C17S C4S C14S C7S -15(5) . . . . ?
C8S C4S C14S C7S 73(5) 3_766 . . . ?
C2S C4S C14S C17S 124(7) . . . . ?
C3S C4S C14S C17S 33(9) . . . . ?
C13S C4S C14S C17S 154(10) . . . . ?
C9S C4S C14S C17S 144(6) . . . . ?
C7S C4S C14S C17S 15(5) . . . . ?
C16S C4S C14S C17S 80(8) 3_766 . . . ?
C5S C4S C14S C17S 27(5) . . . . ?
C10S C4S C14S C17S 60(6) . . . . ?
C8S C4S C14S C17S 142(10) . . . . ?
C8S C4S C14S C17S 88(6) 3_766 . . . ?
C2S C4S C14S C3S 91(8) . . . . ?
C13S C4S C14S C3S 121(10) . . . . ?
C9S C4S C14S C3S 111(8) . . . . ?
C7S C4S C14S C3S -19(9) . . . . ?
C16S C4S C14S C3S 47(11) 3_766 . . . ?
C5S C4S C14S C3S -7(7) . . . . ?
C10S C4S C14S C3S 27(8) . . . . ?
C8S C4S C14S C3S 109(11) . . . . ?
C17S C4S C14S C3S -33(9) . . . . ?
C8S C4S C14S C3S 55(8) 3_766 . . . ?
C2S C4S C14S C5S 97(5) . . . . ?
C3S C4S C14S C5S 7(7) . . . . ?
C13S C4S C14S C5S 128(8) . . . . ?
C9S C4S C14S C5S 117(4) . . . . ?
C7S C4S C14S C5S -12(4) . . . . ?
C16S C4S C14S C5S 54(8) 3_766 . . . ?
C10S C4S C14S C5S 34(3) . . . . ?
C8S C4S C14S C5S 115(8) . . . . ?
C17S C4S C14S C5S -27(5) . . . . ?
C8S C4S C14S C5S 61(4) 3_766 . . . ?
C2S C4S C14S C16S 7(5) . . . . ?
C3S C4S C14S C16S -84(9) . . . . ?
C13S C4S C14S C16S 37(7) . . . . ?
C9S C4S C14S C16S 27(4) . . . . ?
C7S C4S C14S C16S -103(5) . . . . ?
C16S C4S C14S C16S -37(8) 3_766 . . . ?
C5S C4S C14S C16S -91(4) . . . . ?
C10S C4S C14S C16S -57(5) . . . . ?
C8S C4S C14S C16S 25(7) . . . . ?
C17S C4S C14S C16S -117(6) . . . . ?
C8S C4S C14S C16S -29(4) 3_766 . . . ?
C2S C4S C14S C8S 36(5) . . . 3_766 ?
C3S C4S C14S C8S -55(8) . . . 3_766 ?
C13S C4S C14S C8S 66(7) . . . 3_766 ?
C9S C4S C14S C8S 56(4) . . . 3_766 ?
C7S C4S C14S C8S -73(5) . . . 3_766 ?
C16S C4S C14S C8S -8(7) 3_766 . . 3_766 ?
C5S C4S C14S C8S -61(4) . . . 3_766 ?
C10S C4S C14S C8S -28(5) . . . 3_766 ?
C8S C4S C14S C8S 54(7) . . . 3_766 ?
C17S C4S C14S C8S -88(6) . . . 3_766 ?
C16S C8S C14S C13S 100(10) 3_766 . . . ?
C10S C8S C14S C13S -120(50) 3_766 . . . ?
C9S C8S C14S C13S 13(8) . . . . ?
C16S C8S C14S C13S 63(11) . . . . ?
C2S C8S C14S C13S 25(7) . . . . ?
C12S C8S C14S C13S -20(21) 3_766 . . . ?
C6S C8S C14S C13S -14(9) . . . . ?
C2S C8S C14S C13S 115(10) 3_766 . . . ?
C9S C8S C14S C13S 116(8) 3_766 . . . ?
C8S C8S C14S C13S 79(8) 3_766 . . . ?
C13S C8S C14S C16S -100(10) . . . 3_766 ?
C10S C8S C14S C16S 141(49) 3_766 . . 3_766 ?
C9S C8S C14S C16S -87(8) . . . 3_766 ?
C16S C8S C14S C16S -37(12) . . . 3_766 ?
C2S C8S C14S C16S -75(7) . . . 3_766 ?
C12S C8S C14S C16S -120(22) 3_766 . . 3_766 ?
C6S C8S C14S C16S -113(10) . . . 3_766 ?
C2S C8S C14S C16S 15(9) 3_766 . . 3_766 ?
C9S C8S C14S C16S 16(7) 3_766 . . 3_766 ?
C8S C8S C14S C16S -21(7) 3_766 . . 3_766 ?
C13S C8S C14S C2S -25(7) . . . . ?
C16S C8S C14S C2S 75(7) 3_766 . . . ?
C10S C8S C14S C2S -145(48) 3_766 . . . ?
C9S C8S C14S C2S -13(5) . . . . ?
C16S C8S C14S C2S 38(10) . . . . ?
C12S C8S C14S C2S -45(21) 3_766 . . . ?
C6S C8S C14S C2S -39(7) . . . . ?
C2S C8S C14S C2S 90(8) 3_766 . . . ?
C9S C8S C14S C2S 91(5) 3_766 . . . ?
C8S C8S C14S C2S 54(6) 3_766 . . . ?
C13S C8S C14S C4S -15(8) . . . . ?
C16S C8S C14S C4S 85(9) 3_766 . . . ?
C10S C8S C14S C4S -134(46) 3_766 . . . ?
C9S C8S C14S C4S -2(9) . . . . ?
C16S C8S C14S C4S 48(13) . . . . ?
C2S C8S C14S C4S 11(5) . . . . ?
C12S C8S C14S C4S -35(24) 3_766 . . . ?
C6S C8S C14S C4S -28(11) . . . . ?
C2S C8S C14S C4S 100(9) 3_766 . . . ?
C9S C8S C14S C4S 101(7) 3_766 . . . ?
C8S C8S C14S C4S 65(9) 3_766 . . . ?
C13S C8S C14S C9S -13(8) . . . . ?
C16S C8S C14S C9S 87(8) 3_766 . . . ?
C10S C8S C14S C9S -132(51) 3_766 . . . ?
C16S C8S C14S C9S 51(8) . . . . ?
C2S C8S C14S C9S 13(5) . . . . ?
C12S C8S C14S C9S -33(18) 3_766 . . . ?
C6S C8S C14S C9S -26(5) . . . . ?
C2S C8S C14S C9S 102(8) 3_766 . . . ?
C9S C8S C14S C9S 103(6) 3_766 . . . ?
C8S C8S C14S C9S 67(5) 3_766 . . . ?
C13S C8S C14S C7S -108(13) . . . . ?
C16S C8S C14S C7S -8(11) 3_766 . . . ?
C10S C8S C14S C7S 132(45) 3_766 . . . ?
C9S C8S C14S C7S -95(11) . . . . ?
C16S C8S C14S C7S -45(15) . . . . ?
C2S C8S C14S C7S -83(9) . . . . ?
C12S C8S C14S C7S -128(19) 3_766 . . . ?
C6S C8S C14S C7S -122(11) . . . . ?
C2S C8S C14S C7S 7(15) 3_766 . . . ?
C9S C8S C14S C7S 8(12) 3_766 . . . ?
C8S C8S C14S C7S -29(13) 3_766 . . . ?
C13S C8S C14S C17S -151(11) . . . . ?
C16S C8S C14S C17S -51(9) 3_766 . . . ?
C10S C8S C14S C17S 90(49) 3_766 . . . ?
C9S C8S C14S C17S -138(7) . . . . ?
C16S C8S C14S C17S -88(11) . . . . ?
C2S C8S C14S C17S -125(8) . . . . ?
C12S C8S C14S C17S -171(17) 3_766 . . . ?
C6S C8S C14S C17S -164(6) . . . . ?
C2S C8S C14S C17S -36(11) 3_766 . . . ?
C9S C8S C14S C17S -35(8) 3_766 . . . ?
C8S C8S C14S C17S -71(8) 3_766 . . . ?
C13S C8S C14S C3S -58(10) . . . . ?
C16S C8S C14S C3S 42(9) 3_766 . . . ?
C10S C8S C14S C3S -177(44) 3_766 . . . ?
C9S C8S C14S C3S -45(10) . . . . ?
C16S C8S C14S C3S 6(15) . . . . ?
C2S C8S C14S C3S -32(7) . . . . ?
C12S C8S C14S C3S -78(23) 3_766 . . . ?
C6S C8S C14S C3S -71(11) . . . . ?
C2S C8S C14S C3S 57(12) 3_766 . . . ?
C9S C8S C14S C3S 58(10) 3_766 . . . ?
C8S C8S C14S C3S 22(11) 3_766 . . . ?
C13S C8S C14S C5S -90(10) . . . . ?
C16S C8S C14S C5S 10(9) 3_766 . . . ?
C10S C8S C14S C5S 150(45) 3_766 . . . ?
C9S C8S C14S C5S -78(9) . . . . ?
C16S C8S C14S C5S -27(14) . . . . ?
C2S C8S C14S C5S -65(6) . . . . ?
C12S C8S C14S C5S -110(20) 3_766 . . . ?
C6S C8S C14S C5S -104(9) . . . . ?
C2S C8S C14S C5S 25(12) 3_766 . . . ?
C9S C8S C14S C5S 26(9) 3_766 . . . ?
C8S C8S C14S C5S -11(10) 3_766 . . . ?
C13S C8S C14S C16S -63(11) . . . . ?
C16S C8S C14S C16S 37(12) 3_766 . . . ?
C10S C8S C14S C16S 177(55) 3_766 . . . ?
C9S C8S C14S C16S -51(8) . . . . ?
C2S C8S C14S C16S -38(10) . . . . ?
C12S C8S C14S C16S -83(21) 3_766 . . . ?
C6S C8S C14S C16S -77(9) . . . . ?
C2S C8S C14S C16S 52(7) 3_766 . . . ?
C9S C8S C14S C16S 53(7) 3_766 . . . ?
C8S C8S C14S C16S 16(5) 3_766 . . . ?
C13S C8S C14S C8S -79(8) . . . 3_766 ?
C16S C8S C14S C8S 21(7) 3_766 . . 3_766 ?
C10S C8S C14S C8S 161(53) 3_766 . . 3_766 ?
C9S C8S C14S C8S -67(5) . . . 3_766 ?
C16S C8S C14S C8S -16(5) . . . 3_766 ?
C2S C8S C14S C8S -54(6) . . . 3_766 ?
C12S C8S C14S C8S -99(21) 3_766 . . 3_766 ?
C6S C8S C14S C8S -93(8) . . . 3_766 ?
C2S C8S C14S C8S 36(4) 3_766 . . 3_766 ?
C9S C8S C14S C8S 37(3) 3_766 . . 3_766 ?
C2S C9S C14S C13S 124(39) . . . . ?
C15S C9S C14S C13S -13(54) . . . . ?
C6S C9S C14S C13S -39(38) . . . . ?
C8S C9S C14S C13S -79(38) . . . . ?
C16S C9S C14S C13S -124(38) . . . . ?
C4S C9S C14S C13S 103(38) . . . . ?
C16S C9S C14S C13S -146(39) 3_766 . . . ?
C8S C9S C14S C13S -159(38) 3_766 . . . ?
C12S C9S C14S C13S -68(38) 3_766 . . . ?
C1S C9S C14S C13S -56(38) 3_766 . . . ?
C13S C9S C14S C16S 146(39) . . . 3_766 ?
C2S C9S C14S C16S -90(8) . . . 3_766 ?
C15S C9S C14S C16S 134(38) . . . 3_766 ?
C6S C9S C14S C16S 108(8) . . . 3_766 ?
C8S C9S C14S C16S 67(9) . . . 3_766 ?
C16S C9S C14S C16S 23(10) . . . 3_766 ?
C4S C9S C14S C16S -111(7) . . . 3_766 ?
C8S C9S C14S C16S -12(6) 3_766 . . 3_766 ?
C12S C9S C14S C16S 79(8) 3_766 . . 3_766 ?
C1S C9S C14S C16S 90(8) 3_766 . . 3_766 ?
C13S C9S C14S C2S -124(39) . . . . ?
C15S C9S C14S C2S -137(40) . . . . ?
C6S C9S C14S C2S -163(9) . . . . ?
C8S C9S C14S C2S 157(9) . . . . ?
C16S C9S C14S C2S 112(8) . . . . ?
C4S C9S C14S C2S -21(5) . . . . ?
C16S C9S C14S C2S 90(8) 3_766 . . . ?
C8S C9S C14S C2S 77(6) 3_766 . . . ?
C12S C9S C14S C2S 168(8) 3_766 . . . ?
C1S C9S C14S C2S 180(9) 3_766 . . . ?
C13S C9S C14S C4S -103(38) . . . . ?
C2S C9S C14S C4S 21(5) . . . . ?
C15S C9S C14S C4S -116(39) . . . . ?
C6S C9S C14S C4S -142(7) . . . . ?
C8S C9S C14S C4S 178(8) . . . . ?
C16S C9S C14S C4S 134(6) . . . . ?
C16S C9S C14S C4S 111(7) 3_766 . . . ?
C8S C9S C14S C4S 98(5) 3_766 . . . ?
C12S C9S C14S C4S -171(6) 3_766 . . . ?
C1S C9S C14S C4S -159(7) 3_766 . . . ?
C13S C9S C14S C8S 79(38) . . . . ?
C2S C9S C14S C8S -157(9) . . . . ?
C15S C9S C14S C8S 66(39) . . . . ?
C6S C9S C14S C8S 41(8) . . . . ?
C16S C9S C14S C8S -44(7) . . . . ?
C4S C9S C14S C8S -178(8) . . . . ?
C16S C9S C14S C8S -67(9) 3_766 . . . ?
C8S C9S C14S C8S -79(5) 3_766 . . . ?
C12S C9S C14S C8S 11(8) 3_766 . . . ?
C1S C9S C14S C8S 23(9) 3_766 . . . ?
C13S C9S C14S C7S -159(40) . . . . ?
C2S C9S C14S C7S -35(7) . . . . ?
C15S C9S C14S C7S -172(36) . . . . ?
C6S C9S C14S C7S 162(7) . . . . ?
C8S C9S C14S C7S 122(9) . . . . ?
C16S C9S C14S C7S 77(9) . . . . ?
C4S C9S C14S C7S -56(6) . . . . ?
C16S C9S C14S C7S 54(7) 3_766 . . . ?
C8S C9S C14S C7S 42(7) 3_766 . . . ?
C12S C9S C14S C7S 133(8) 3_766 . . . ?
C1S C9S C14S C7S 144(7) 3_766 . . . ?
C13S C9S C14S C17S 173(43) . . . . ?
C2S C9S C14S C17S -63(12) . . . . ?
C15S C9S C14S C17S 160(34) . . . . ?
C6S C9S C14S C17S 134(11) . . . . ?
C8S C9S C14S C17S 94(14) . . . . ?
C16S C9S C14S C17S 50(14) . . . . ?
C4S C9S C14S C17S -84(12) . . . . ?
C16S C9S C14S C17S 27(11) 3_766 . . . ?
C8S C9S C14S C17S 14(12) 3_766 . . . ?
C12S C9S C14S C17S 105(12) 3_766 . . . ?
C1S C9S C14S C17S 117(11) 3_766 . . . ?
C13S C9S C14S C3S -137(38) . . . . ?
C2S C9S C14S C3S -13(6) . . . . ?
C15S C9S C14S C3S -150(38) . . . . ?
C6S C9S C14S C3S -176(6) . . . . ?
C8S C9S C14S C3S 144(8) . . . . ?
C16S C9S C14S C3S 99(7) . . . . ?
C4S C9S C14S C3S -34(4) . . . . ?
C16S C9S C14S C3S 76(6) 3_766 . . . ?
C8S C9S C14S C3S 64(4) 3_766 . . . ?
C12S C9S C14S C3S 155(6) 3_766 . . . ?
C1S C9S C14S C3S 166(7) 3_766 . . . ?
C13S C9S C14S C5S -157(39) . . . . ?
C2S C9S C14S C5S -33(5) . . . . ?
C15S C9S C14S C5S -170(37) . . . . ?
C6S C9S C14S C5S 164(5) . . . . ?
C8S C9S C14S C5S 124(8) . . . . ?
C16S C9S C14S C5S 79(6) . . . . ?
C4S C9S C14S C5S -54(4) . . . . ?
C16S C9S C14S C5S 57(6) 3_766 . . . ?
C8S C9S C14S C5S 44(4) 3_766 . . . ?
C12S C9S C14S C5S 135(5) 3_766 . . . ?
C1S C9S C14S C5S 147(6) 3_766 . . . ?
C13S C9S C14S C16S 124(38) . . . . ?
C2S C9S C14S C16S -112(8) . . . . ?
C15S C9S C14S C16S 111(40) . . . . ?
C6S C9S C14S C16S 85(7) . . . . ?
C8S C9S C14S C16S 44(7) . . . . ?
C4S C9S C14S C16S -134(6) . . . . ?
C16S C9S C14S C16S -23(10) 3_766 . . . ?
C8S C9S C14S C16S -35(5) 3_766 . . . ?
C12S C9S C14S C16S 56(6) 3_766 . . . ?
C1S C9S C14S C16S 67(7) 3_766 . . . ?
C13S C9S C14S C8S 159(38) . . . 3_766 ?
C2S C9S C14S C8S -77(6) . . . 3_766 ?
C15S C9S C14S C8S 146(39) . . . 3_766 ?
C6S C9S C14S C8S 120(7) . . . 3_766 ?
C8S C9S C14S C8S 79(5) . . . 3_766 ?
C16S C9S C14S C8S 35(5) . . . 3_766 ?
C4S C9S C14S C8S -98(5) . . . 3_766 ?
C16S C9S C14S C8S 12(6) 3_766 . . 3_766 ?
C12S C9S C14S C8S 91(6) 3_766 . . 3_766 ?
C1S C9S C14S C8S 102(7) 3_766 . . 3_766 ?
C5S C7S C14S C13S 4(23) . . . . ?
C18S C7S C14S C13S -86(27) 3_766 . . . ?
C17S C7S C14S C13S -157(14) . . . . ?
C3S C7S C14S C13S 30(15) . . . . ?
C12S C7S C14S C13S -45(16) . . . . ?
C1S C7S C14S C13S -92(14) . . . . ?
C11S C7S C14S C13S -135(13) 3_766 . . . ?
C10S C7S C14S C13S -19(14) . . . . ?
C16S C7S C14S C13S -59(11) 3_766 . . . ?
C4S C7S C14S C13S 48(12) . . . . ?
C6S C7S C14S C13S -78(13) 3_766 . . . ?
C5S C7S C14S C16S 63(18) . . . 3_766 ?
C18S C7S C14S C16S -27(24) 3_766 . . 3_766 ?
C17S C7S C14S C16S -98(11) . . . 3_766 ?
C3S C7S C14S C16S 90(10) . . . 3_766 ?
C12S C7S C14S C16S 14(10) . . . 3_766 ?
C1S C7S C14S C16S -33(10) . . . 3_766 ?
C11S C7S C14S C16S -76(10) 3_766 . . 3_766 ?
C10S C7S C14S C16S 40(8) . . . 3_766 ?
C4S C7S C14S C16S 107(8) . . . 3_766 ?
C6S C7S C14S C16S -18(8) 3_766 . . 3_766 ?
C5S C7S C14S C2S -10(17) . . . . ?
C18S C7S C14S C2S -100(23) 3_766 . . . ?
C17S C7S C14S C2S -171(9) . . . . ?
C3S C7S C14S C2S 16(8) . . . . ?
C12S C7S C14S C2S -59(8) . . . . ?
C1S C7S C14S C2S -107(8) . . . . ?
C11S C7S C14S C2S -149(8) 3_766 . . . ?
C10S C7S C14S C2S -33(7) . . . . ?
C16S C7S C14S C2S -74(7) 3_766 . . . ?
C4S C7S C14S C2S 33(4) . . . . ?
C6S C7S C14S C2S -92(5) 3_766 . . . ?
C5S C7S C14S C4S -43(16) . . . . ?
C18S C7S C14S C4S -133(23) 3_766 . . . ?
C17S C7S C14S C4S 155(9) . . . . ?
C3S C7S C14S C4S -17(7) . . . . ?
C12S C7S C14S C4S -92(7) . . . . ?
C1S C7S C14S C4S -140(7) . . . . ?
C11S C7S C14S C4S 177(9) 3_766 . . . ?
C10S C7S C14S C4S -66(6) . . . . ?
C16S C7S C14S C4S -107(8) 3_766 . . . ?
C6S C7S C14S C4S -125(5) 3_766 . . . ?
C5S C7S C14S C8S 71(21) . . . . ?
C18S C7S C14S C8S -19(29) 3_766 . . . ?
C17S C7S C14S C8S -90(14) . . . . ?
C3S C7S C14S C8S 97(13) . . . . ?
C12S C7S C14S C8S 22(15) . . . . ?
C1S C7S C14S C8S -25(15) . . . . ?
C11S C7S C14S C8S -68(14) 3_766 . . . ?
C10S C7S C14S C8S 48(13) . . . . ?
C16S C7S C14S C8S 8(10) 3_766 . . . ?
C4S C7S C14S C8S 114(12) . . . . ?
C6S C7S C14S C8S -11(13) 3_766 . . . ?
C5S C7S C14S C9S 9(20) . . . . ?
C18S C7S C14S C9S -81(25) 3_766 . . . ?
C17S C7S C14S C9S -153(10) . . . . ?
C3S C7S C14S C9S 35(10) . . . . ?
C12S C7S C14S C9S -40(11) . . . . ?
C1S C7S C14S C9S -88(9) . . . . ?
C11S C7S C14S C9S -131(9) 3_766 . . . ?
C10S C7S C14S C9S -14(9) . . . . ?
C16S C7S C14S C9S -55(7) 3_766 . . . ?
C4S C7S C14S C9S 52(6) . . . . ?
C6S C7S C14S C9S -73(7) 3_766 . . . ?
C5S C7S C14S C17S 161(22) . . . . ?
C18S C7S C14S C17S 71(24) 3_766 . . . ?
C3S C7S C14S C17S -172(13) . . . . ?
C12S C7S C14S C17S 112(13) . . . . ?
C1S C7S C14S C17S 65(9) . . . . ?
C11S C7S C14S C17S 22(8) 3_766 . . . ?
C10S C7S C14S C17S 138(11) . . . . ?
C16S C7S C14S C17S 98(11) 3_766 . . . ?
C4S C7S C14S C17S -155(9) . . . . ?
C6S C7S C14S C17S 80(9) 3_766 . . . ?
C5S C7S C14S C3S -26(14) . . . . ?
C18S C7S C14S C3S -116(25) 3_766 . . . ?
C17S C7S C14S C3S 172(13) . . . . ?
C12S C7S C14S C3S -75(8) . . . . ?
C1S C7S C14S C3S -123(11) . . . . ?
C11S C7S C14S C3S -166(13) 3_766 . . . ?
C10S C7S C14S C3S -49(7) . . . . ?
C16S C7S C14S C3S -90(10) 3_766 . . . ?
C4S C7S C14S C3S 17(7) . . . . ?
C6S C7S C14S C3S -108(8) 3_766 . . . ?
C18S C7S C14S C5S -90(27) 3_766 . . . ?
C17S C7S C14S C5S -161(22) . . . . ?
C3S C7S C14S C5S 26(14) . . . . ?
C12S C7S C14S C5S -49(14) . . . . ?
C1S C7S C14S C5S -96(18) . . . . ?
C11S C7S C14S C5S -139(22) 3_766 . . . ?
C10S C7S C14S C5S -23(14) . . . . ?
C16S C7S C14S C5S -63(18) 3_766 . . . ?
C4S C7S C14S C5S 43(16) . . . . ?
C6S C7S C14S C5S -82(17) 3_766 . . . ?
C5S C7S C14S C16S 47(18) . . . . ?
C18S C7S C14S C16S -43(24) 3_766 . . . ?
C17S C7S C14S C16S -114(9) . . . . ?
C3S C7S C14S C16S 73(9) . . . . ?
C12S C7S C14S C16S -2(9) . . . . ?
C1S C7S C14S C16S -49(9) . . . . ?
C11S C7S C14S C16S -92(9) 3_766 . . . ?
C10S C7S C14S C16S 24(8) . . . . ?
C16S C7S C14S C16S -16(8) 3_766 . . . ?
C4S C7S C14S C16S 90(6) . . . . ?
C6S C7S C14S C16S -35(6) 3_766 . . . ?
C5S C7S C14S C8S 44(16) . . . 3_766 ?
C18S C7S C14S C8S -46(23) 3_766 . . 3_766 ?
C17S C7S C14S C8S -117(9) . . . 3_766 ?
C3S C7S C14S C8S 71(7) . . . 3_766 ?
C12S C7S C14S C8S -5(7) . . . 3_766 ?
C1S C7S C14S C8S -52(7) . . . 3_766 ?
C11S C7S C14S C8S -95(8) 3_766 . . 3_766 ?
C10S C7S C14S C8S 21(6) . . . 3_766 ?
C16S C7S C14S C8S -19(7) 3_766 . . 3_766 ?
C4S C7S C14S C8S 88(4) . . . 3_766 ?
C6S C7S C14S C8S -37(4) 3_766 . . 3_766 ?
C5S C3S C14S C13S -140(12) . . . . ?
C4S C3S C14S C13S 53(11) . . . . ?
C7S C3S C14S C13S -156(11) . . . . ?
C10S C3S C14S C13S -79(12) . . . . ?
C2S C3S C14S C13S 3(8) . . . . ?
C18S C3S C14S C13S -140(10) 3_766 . . . ?
C12S C3S C14S C13S -108(10) . . . . ?
C16S C3S C14S C13S -79(8) 3_766 . . . ?
C17S C3S C14S C13S -160(10) . . . . ?
C8S C3S C14S C13S -63(8) 3_766 . . . ?
C5S C3S C14S C16S -62(11) . . . 3_766 ?
C4S C3S C14S C16S 131(11) . . . 3_766 ?
C7S C3S C14S C16S -77(9) . . . 3_766 ?
C10S C3S C14S C16S 0(10) . . . 3_766 ?
C2S C3S C14S C16S 82(8) . . . 3_766 ?
C18S C3S C14S C16S -61(9) 3_766 . . 3_766 ?
C12S C3S C14S C16S -29(8) . . . 3_766 ?
C13S C3S C14S C16S 79(8) . . . 3_766 ?
C17S C3S C14S C16S -81(8) . . . 3_766 ?
C8S C3S C14S C16S 16(7) 3_766 . . 3_766 ?
C5S C3S C14S C2S -143(11) . . . . ?
C4S C3S C14S C2S 50(6) . . . . ?
C7S C3S C14S C2S -159(10) . . . . ?
C10S C3S C14S C2S -82(10) . . . . ?
C18S C3S C14S C2S -143(9) 3_766 . . . ?
C12S C3S C14S C2S -111(8) . . . . ?
C16S C3S C14S C2S -82(8) 3_766 . . . ?
C13S C3S C14S C2S -3(7) . . . . ?
C17S C3S C14S C2S -163(7) . . . . ?
C8S C3S C14S C2S -66(5) 3_766 . . . ?
C5S C3S C14S C4S 167(14) . . . . ?
C7S C3S C14S C4S 152(13) . . . . ?
C10S C3S C14S C4S -132(13) . . . . ?
C2S C3S C14S C4S -50(6) . . . . ?
C18S C3S C14S C4S 168(11) 3_766 . . . ?
C12S C3S C14S C4S -161(12) . . . . ?
C16S C3S C14S C4S -131(11) 3_766 . . . ?
C13S C3S C14S C4S -53(11) . . . . ?
C17S C3S C14S C4S 147(9) . . . . ?
C8S C3S C14S C4S -116(9) 3_766 . . . ?
C5S C3S C14S C8S -99(13) . . . . ?
C4S C3S C14S C8S 94(13) . . . . ?
C7S C3S C14S C8S -114(12) . . . . ?
C10S C3S C14S C8S -38(14) . . . . ?
C2S C3S C14S C8S 44(9) . . . . ?
C18S C3S C14S C8S -98(11) 3_766 . . . ?
C12S C3S C14S C8S -66(12) . . . . ?
C16S C3S C14S C8S -37(9) 3_766 . . . ?
C13S C3S C14S C8S 41(8) . . . . ?
C17S C3S C14S C8S -119(11) . . . . ?
C8S C3S C14S C8S -21(11) 3_766 . . . ?
C5S C3S C14S C9S -134(9) . . . . ?
C4S C3S C14S C9S 59(8) . . . . ?
C7S C3S C14S C9S -149(8) . . . . ?
C10S C3S C14S C9S -72(9) . . . . ?
C2S C3S C14S C9S 10(4) . . . . ?
C18S C3S C14S C9S -133(7) 3_766 . . . ?
C12S C3S C14S C9S -101(7) . . . . ?
C16S C3S C14S C9S -72(6) 3_766 . . . ?
C13S C3S C14S C9S 7(7) . . . . ?
C17S C3S C14S C9S -153(6) . . . . ?
C8S C3S C14S C9S -56(5) 3_766 . . . ?
C5S C3S C14S C7S 15(8) . . . . ?
C4S C3S C14S C7S -152(13) . . . . ?
C10S C3S C14S C7S 77(9) . . . . ?
C2S C3S C14S C7S 159(10) . . . . ?
C18S C3S C14S C7S 16(7) 3_766 . . . ?
C12S C3S C14S C7S 48(6) . . . . ?
C16S C3S C14S C7S 77(9) 3_766 . . . ?
C13S C3S C14S C7S 156(11) . . . . ?
C17S C3S C14S C7S -5(8) . . . . ?
C8S C3S C14S C7S 93(8) 3_766 . . . ?
C5S C3S C14S C17S 20(8) . . . . ?
C4S C3S C14S C17S -147(9) . . . . ?
C7S C3S C14S C17S 5(8) . . . . ?
C10S C3S C14S C17S 81(8) . . . . ?
C2S C3S C14S C17S 163(7) . . . . ?
C18S C3S C14S C17S 20(7) 3_766 . . . ?
C12S C3S C14S C17S 52(6) . . . . ?
C16S C3S C14S C17S 81(8) 3_766 . . . ?
C13S C3S C14S C17S 160(10) . . . . ?
C8S C3S C14S C17S 97(5) 3_766 . . . ?
C4S C3S C14S C5S -167(14) . . . . ?
C7S C3S C14S C5S -15(8) . . . . ?
C10S C3S C14S C5S 61(7) . . . . ?
C2S C3S C14S C5S 143(11) . . . . ?
C18S C3S C14S C5S 1(7) 3_766 . . . ?
C12S C3S C14S C5S 33(5) . . . . ?
C16S C3S C14S C5S 62(10) 3_766 . . . ?
C13S C3S C14S C5S 140(12) . . . . ?
C17S C3S C14S C5S -20(8) . . . . ?
C8S C3S C14S C5S 78(8) 3_766 . . . ?
C5S C3S C14S C16S -96(9) . . . . ?
C4S C3S C14S C16S 97(8) . . . . ?
C7S C3S C14S C16S -111(8) . . . . ?
C10S C3S C14S C16S -35(9) . . . . ?
C2S C3S C14S C16S 47(4) . . . . ?
C18S C3S C14S C16S -95(7) 3_766 . . . ?
C12S C3S C14S C16S -63(7) . . . . ?
C16S C3S C14S C16S -34(8) 3_766 . . . ?
C13S C3S C14S C16S 45(7) . . . . ?
C17S C3S C14S C16S -116(6) . . . . ?
C8S C3S C14S C16S -18(4) 3_766 . . . ?
C5S C3S C14S C8S -78(8) . . . 3_766 ?
C4S C3S C14S C8S 116(9) . . . 3_766 ?
C7S C3S C14S C8S -93(8) . . . 3_766 ?
C10S C3S C14S C8S -16(8) . . . 3_766 ?
C2S C3S C14S C8S 66(5) . . . 3_766 ?
C18S C3S C14S C8S -77(6) 3_766 . . 3_766 ?
C12S C3S C14S C8S -45(6) . . . 3_766 ?
C16S C3S C14S C8S -16(7) 3_766 . . 3_766 ?
C13S C3S C14S C8S 63(8) . . . 3_766 ?
C17S C3S C14S C8S -97(5) . . . 3_766 ?
C7S C5S C14S C13S -176(20) . . . . ?
C18S C5S C14S C13S -136(14) 3_766 . . . ?
C3S C5S C14S C13S 43(13) . . . . ?
C12S C5S C14S C13S -73(12) . . . . ?
C10S C5S C14S C13S -29(12) . . . . ?
C1S C5S C14S C13S -116(10) . . . . ?
C17S C5S C14S C13S -163(12) . . . . ?
C11S C5S C14S C13S -148(10) 3_766 . . . ?
C4S C5S C14S C13S 51(10) . . . . ?
C6S C5S C14S C13S -94(9) 3_766 . . . ?
C16S C5S C14S C13S -66(9) 3_766 . . . ?
C2S C5S C14S C13S 14(8) . . . . ?
C7S C5S C14S C16S -110(19) . . . 3_766 ?
C18S C5S C14S C16S -70(13) 3_766 . . 3_766 ?
C3S C5S C14S C16S 109(12) . . . 3_766 ?
C12S C5S C14S C16S -7(10) . . . 3_766 ?
C10S C5S C14S C16S 37(9) . . . 3_766 ?
C1S C5S C14S C16S -50(8) . . . 3_766 ?
C17S C5S C14S C16S -97(9) . . . 3_766 ?
C11S C5S C14S C16S -82(8) 3_766 . . 3_766 ?
C4S C5S C14S C16S 117(9) . . . 3_766 ?
C6S C5S C14S C16S -28(7) 3_766 . . 3_766 ?
C2S C5S C14S C16S 80(8) . . . 3_766 ?
C7S C5S C14S C2S 169(18) . . . . ?
C18S C5S C14S C2S -150(12) 3_766 . . . ?
C3S C5S C14S C2S 28(10) . . . . ?
C12S C5S C14S C2S -87(8) . . . . ?
C10S C5S C14S C2S -43(7) . . . . ?
C1S C5S C14S C2S -131(5) . . . . ?
C17S C5S C14S C2S -177(7) . . . . ?
C11S C5S C14S C2S -162(5) 3_766 . . . ?
C4S C5S C14S C2S 37(4) . . . . ?
C6S C5S C14S C2S -108(4) 3_766 . . . ?
C16S C5S C14S C2S -80(8) 3_766 . . . ?
C7S C5S C14S C4S 132(18) . . . . ?
C18S C5S C14S C4S 173(12) 3_766 . . . ?
C3S C5S C14S C4S -9(9) . . . . ?
C12S C5S C14S C4S -124(8) . . . . ?
C10S C5S C14S C4S -81(7) . . . . ?
C1S C5S C14S C4S -168(5) . . . . ?
C17S C5S C14S C4S 146(7) . . . . ?
C11S C5S C14S C4S 161(5) 3_766 . . . ?
C6S C5S C14S C4S -145(5) 3_766 . . . ?
C16S C5S C14S C4S -117(9) 3_766 . . . ?
C2S C5S C14S C4S -37(4) . . . . ?
C7S C5S C14S C8S -120(20) . . . . ?
C18S C5S C14S C8S -79(15) 3_766 . . . ?
C3S C5S C14S C8S 99(13) . . . . ?
C12S C5S C14S C8S -16(12) . . . . ?
C10S C5S C14S C8S 27(12) . . . . ?
C1S C5S C14S C8S -60(10) . . . . ?
C17S C5S C14S C8S -106(11) . . . . ?
C11S C5S C14S C8S -91(10) 3_766 . . . ?
C4S C5S C14S C8S 108(11) . . . . ?
C6S C5S C14S C8S -37(10) 3_766 . . . ?
C16S C5S C14S C8S -9(8) 3_766 . . . ?
C2S C5S C14S C8S 71(9) . . . . ?
C7S C5S C14S C9S -172(18) . . . . ?
C18S C5S C14S C9S -132(12) 3_766 . . . ?
C3S C5S C14S C9S 47(10) . . . . ?
C12S C5S C14S C9S -68(8) . . . . ?
C10S C5S C14S C9S -25(8) . . . . ?
C1S C5S C14S C9S -112(5) . . . . ?
C17S C5S C14S C9S -158(7) . . . . ?
C11S C5S C14S C9S -144(6) 3_766 . . . ?
C4S C5S C14S C9S 56(5) . . . . ?
C6S C5S C14S C9S -90(5) 3_766 . . . ?
C16S C5S C14S C9S -62(7) 3_766 . . . ?
C2S C5S C14S C9S 18(3) . . . . ?
C18S C5S C14S C7S 40(17) 3_766 . . . ?
C3S C5S C14S C7S -141(20) . . . . ?
C12S C5S C14S C7S 104(19) . . . . ?
C10S C5S C14S C7S 147(20) . . . . ?
C1S C5S C14S C7S 60(17) . . . . ?
C17S C5S C14S C7S 14(17) . . . . ?
C11S C5S C14S C7S 29(16) 3_766 . . . ?
C4S C5S C14S C7S -132(18) . . . . ?
C6S C5S C14S C7S 83(17) 3_766 . . . ?
C16S C5S C14S C7S 110(19) 3_766 . . . ?
C2S C5S C14S C7S -169(18) . . . . ?
C7S C5S C14S C17S -14(17) . . . . ?
C18S C5S C14S C17S 26(13) 3_766 . . . ?
C3S C5S C14S C17S -155(10) . . . . ?
C12S C5S C14S C17S 90(9) . . . . ?
C10S C5S C14S C17S 133(8) . . . . ?
C1S C5S C14S C17S 46(6) . . . . ?
C11S C5S C14S C17S 15(6) 3_766 . . . ?
C4S C5S C14S C17S -146(7) . . . . ?
C6S C5S C14S C17S 69(6) 3_766 . . . ?
C16S C5S C14S C17S 97(9) 3_766 . . . ?
C2S C5S C14S C17S 177(7) . . . . ?
C7S C5S C14S C3S 141(20) . . . . ?
C18S C5S C14S C3S -179(15) 3_766 . . . ?
C12S C5S C14S C3S -115(12) . . . . ?
C10S C5S C14S C3S -72(10) . . . . ?
C1S C5S C14S C3S -159(10) . . . . ?
C17S C5S C14S C3S 155(10) . . . . ?
C11S C5S C14S C3S 170(10) 3_766 . . . ?
C4S C5S C14S C3S 9(9) . . . . ?
C6S C5S C14S C3S -137(10) 3_766 . . . ?
C16S C5S C14S C3S -109(12) 3_766 . . . ?
C2S C5S C14S C3S -28(10) . . . . ?
C7S C5S C14S C16S -135(18) . . . . ?
C18S C5S C14S C16S -94(12) 3_766 . . . ?
C3S C5S C14S C16S 84(10) . . . . ?
C12S C5S C14S C16S -31(8) . . . . ?
C10S C5S C14S C16S 13(7) . . . . ?
C1S C5S C14S C16S -75(5) . . . . ?
C17S C5S C14S C16S -121(7) . . . . ?
C11S C5S C14S C16S -106(5) 3_766 . . . ?
C4S C5S C14S C16S 93(5) . . . . ?
C6S C5S C14S C16S -52(4) 3_766 . . . ?
C16S C5S C14S C16S -24(8) 3_766 . . . ?
C2S C5S C14S C16S 56(3) . . . . ?
C7S C5S C14S C8S -131(18) . . . 3_766 ?
C18S C5S C14S C8S -90(12) 3_766 . . 3_766 ?
C3S C5S C14S C8S 88(10) . . . 3_766 ?
C12S C5S C14S C8S -27(7) . . . 3_766 ?
C10S C5S C14S C8S 16(6) . . . 3_766 ?
C1S C5S C14S C8S -71(4) . . . 3_766 ?
C17S C5S C14S C8S -117(6) . . . 3_766 ?
C11S C5S C14S C8S -102(5) 3_766 . . 3_766 ?
C4S C5S C14S C8S 97(5) . . . 3_766 ?
C6S C5S C14S C8S -48(3) 3_766 . . 3_766 ?
C16S C5S C14S C8S -20(7) 3_766 . . 3_766 ?
C2S C5S C14S C8S 60(4) . . . 3_766 ?
C1S C6S C15S C9S -144(9) 3_766 . . . ?
C12S C6S C15S C9S -79(17) 3_766 . . . ?
C18S C6S C15S C9S -120(9) . . . . ?
C11S C6S C15S C9S -140(7) . . . . ?
C10S C6S C15S C9S -53(16) 3_766 . . . ?
C16S C6S C15S C9S -51(5) . . . . ?
C8S C6S C15S C9S -16(9) . . . . ?
C13S C6S C15S C9S 6(6) . . . . ?
C7S C6S C15S C9S -97(7) 3_766 . . . ?
C5S C6S C15S C9S -96(10) 3_766 . . . ?
C12S C6S C15S C1S 65(13) 3_766 . . 3_766 ?
C9S C6S C15S C1S 144(9) . . . 3_766 ?
C18S C6S C15S C1S 23(5) . . . 3_766 ?
C11S C6S C15S C1S 4(7) . . . 3_766 ?
C10S C6S C15S C1S 91(12) 3_766 . . 3_766 ?
C16S C6S C15S C1S 93(7) . . . 3_766 ?
C8S C6S C15S C1S 128(9) . . . 3_766 ?
C13S C6S C15S C1S 150(7) . . . 3_766 ?
C7S C6S C15S C1S 47(6) 3_766 . . 3_766 ?
C5S C6S C15S C1S 48(7) 3_766 . . 3_766 ?
C1S C6S C15S C11S -4(7) 3_766 . . . ?
C12S C6S C15S C11S 61(14) 3_766 . . . ?
C9S C6S C15S C11S 140(7) . . . . ?
C18S C6S C15S C11S 19(7) . . . . ?
C10S C6S C15S C11S 87(12) 3_766 . . . ?
C16S C6S C15S C11S 89(5) . . . . ?
C8S C6S C15S C11S 124(7) . . . . ?
C13S C6S C15S C11S 146(5) . . . . ?
C7S C6S C15S C11S 43(5) 3_766 . . . ?
C5S C6S C15S C11S 44(8) 3_766 . . . ?
C1S C6S C15S C16S -93(7) 3_766 . . . ?
C12S C6S C15S C16S -29(15) 3_766 . . . ?
C9S C6S C15S C16S 51(5) . . . . ?
C18S C6S C15S C16S -70(7) . . . . ?
C11S C6S C15S C16S -89(5) . . . . ?
C10S C6S C15S C16S -2(14) 3_766 . . . ?
C8S C6S C15S C16S 34(7) . . . . ?
C13S C6S C15S C16S 57(4) . . . . ?
C7S C6S C15S C16S -46(5) 3_766 . . . ?
C5S C6S C15S C16S -45(9) 3_766 . . . ?
C1S C6S C15S C12S -65(13) 3_766 . . 3_766 ?
C9S C6S C15S C12S 79(17) . . . 3_766 ?
C18S C6S C15S C12S -41(11) . . . 3_766 ?
C11S C6S C15S C12S -61(14) . . . 3_766 ?
C10S C6S C15S C12S 27(8) 3_766 . . 3_766 ?
C16S C6S C15S C12S 29(15) . . . 3_766 ?
C8S C6S C15S C12S 63(13) . . . 3_766 ?
C13S C6S C15S C12S 85(14) . . . 3_766 ?
C7S C6S C15S C12S -17(12) 3_766 . . 3_766 ?
C5S C6S C15S C12S -16(9) 3_766 . . 3_766 ?
C1S C6S C15S C17S -32(7) 3_766 . . 3_766 ?
C12S C6S C15S C17S 32(15) 3_766 . . 3_766 ?
C9S C6S C15S C17S 111(6) . . . 3_766 ?
C18S C6S C15S C17S -9(7) . . . 3_766 ?
C11S C6S C15S C17S -28(5) . . . 3_766 ?
C10S C6S C15S C17S 59(13) 3_766 . . 3_766 ?
C16S C6S C15S C17S 61(4) . . . 3_766 ?
C8S C6S C15S C17S 95(7) . . . 3_766 ?
C13S C6S C15S C17S 117(4) . . . 3_766 ?
C7S C6S C15S C17S 15(5) 3_766 . . 3_766 ?
C5S C6S C15S C17S 16(8) 3_766 . . 3_766 ?
C1S C6S C15S C13S -150(7) 3_766 . . . ?
C12S C6S C15S C13S -85(14) 3_766 . . . ?
C9S C6S C15S C13S -6(6) . . . . ?
C18S C6S C15S C13S -126(6) . . . . ?
C11S C6S C15S C13S -146(5) . . . . ?
C10S C6S C15S C13S -59(12) 3_766 . . . ?
C16S C6S C15S C13S -57(4) . . . . ?
C8S C6S C15S C13S -22(6) . . . . ?
C7S C6S C15S C13S -102(5) 3_766 . . . ?
C5S C6S C15S C13S -102(7) 3_766 . . . ?
C1S C6S C15S C2S -150(7) 3_766 . . . ?
C12S C6S C15S C2S -86(15) 3_766 . . . ?
C9S C6S C15S C2S -6(4) . . . . ?
C18S C6S C15S C2S -127(7) . . . . ?
C11S C6S C15S C2S -146(6) . . . . ?
C10S C6S C15S C2S -59(14) 3_766 . . . ?
C16S C6S C15S C2S -57(4) . . . . ?
C8S C6S C15S C2S -23(8) . . . . ?
C13S C6S C15S C2S -1(4) . . . . ?
C7S C6S C15S C2S -103(6) 3_766 . . . ?
C5S C6S C15S C2S -102(9) 3_766 . . . ?
C1S C6S C15S C18S -23(5) 3_766 . . . ?
C12S C6S C15S C18S 41(11) 3_766 . . . ?
C9S C6S C15S C18S 120(9) . . . . ?
C11S C6S C15S C18S -19(7) . . . . ?
C10S C6S C15S C18S 68(10) 3_766 . . . ?
C16S C6S C15S C18S 70(7) . . . . ?
C8S C6S C15S C18S 104(8) . . . . ?
C13S C6S C15S C18S 126(6) . . . . ?
C7S C6S C15S C18S 24(5) 3_766 . . . ?
C5S C6S C15S C18S 25(5) 3_766 . . . ?
C1S C6S C15S C8S -128(9) 3_766 . . . ?
C12S C6S C15S C8S -63(13) 3_766 . . . ?
C9S C6S C15S C8S 16(9) . . . . ?
C18S C6S C15S C8S -104(8) . . . . ?
C11S C6S C15S C8S -124(7) . . . . ?
C10S C6S C15S C8S -36(11) 3_766 . . . ?
C16S C6S C15S C8S -34(7) . . . . ?
C13S C6S C15S C8S 22(6) . . . . ?
C7S C6S C15S C8S -80(6) 3_766 . . . ?
C5S C6S C15S C8S -79(7) 3_766 . . . ?
C1S C6S C15S C7S -47(6) 3_766 . . 3_766 ?
C12S C6S C15S C7S 17(12) 3_766 . . 3_766 ?
C9S C6S C15S C7S 97(7) . . . 3_766 ?
C18S C6S C15S C7S -24(5) . . . 3_766 ?
C11S C6S C15S C7S -43(5) . . . 3_766 ?
C10S C6S C15S C7S 44(10) 3_766 . . 3_766 ?
C16S C6S C15S C7S 46(5) . . . 3_766 ?
C8S C6S C15S C7S 80(6) . . . 3_766 ?
C13S C6S C15S C7S 102(5) . . . 3_766 ?
C5S C6S C15S C7S 1(6) 3_766 . . 3_766 ?
C13S C9S C15S C6S -37(30) . . . . ?
C2S C9S C15S C6S -159(12) . . . . ?
C8S C9S C15S C6S 27(14) . . . . ?
C16S C9S C15S C6S 80(8) . . . . ?
C14S C9S C15S C6S -31(43) . . . . ?
C4S C9S C15S C6S -136(9) . . . . ?
C16S C9S C15S C6S 89(13) 3_766 . . . ?
C8S C9S C15S C6S 113(7) 3_766 . . . ?
C12S C9S C15S C6S 27(6) 3_766 . . . ?
C1S C9S C15S C6S 23(4) 3_766 . . . ?
C13S C9S C15S C1S -60(31) . . . 3_766 ?
C2S C9S C15S C1S 178(10) . . . 3_766 ?
C6S C9S C15S C1S -23(4) . . . 3_766 ?
C8S C9S C15S C1S 4(16) . . . 3_766 ?
C16S C9S C15S C1S 57(10) . . . 3_766 ?
C14S C9S C15S C1S -54(44) . . . 3_766 ?
C4S C9S C15S C1S -159(7) . . . 3_766 ?
C16S C9S C15S C1S 66(15) 3_766 . . 3_766 ?
C8S C9S C15S C1S 90(8) 3_766 . . 3_766 ?
C12S C9S C15S C1S 4(8) 3_766 . . 3_766 ?
C13S C9S C15S C11S -93(31) . . . . ?
C2S C9S C15S C11S 145(10) . . . . ?
C6S C9S C15S C11S -56(7) . . . . ?
C8S C9S C15S C11S -29(17) . . . . ?
C16S C9S C15S C11S 24(11) . . . . ?
C14S C9S C15S C11S -87(43) . . . . ?
C4S C9S C15S C11S 168(7) . . . . ?
C16S C9S C15S C11S 33(18) 3_766 . . . ?
C8S C9S C15S C11S 57(10) 3_766 . . . ?
C12S C9S C15S C11S -29(9) 3_766 . . . ?
C1S C9S C15S C11S -33(6) 3_766 . . . ?
C13S C9S C15S C16S -117(27) . . . . ?
C2S C9S C15S C16S 121(16) . . . . ?
C6S C9S C15S C16S -80(8) . . . . ?
C8S C9S C15S C16S -53(9) . . . . ?
C14S C9S C15S C16S -111(39) . . . . ?
C4S C9S C15S C16S 144(12) . . . . ?
C16S C9S C15S C16S 9(13) 3_766 . . . ?
C8S C9S C15S C16S 33(5) 3_766 . . . ?
C12S C9S C15S C16S -53(7) 3_766 . . . ?
C1S C9S C15S C16S -57(10) 3_766 . . . ?
C13S C9S C15S C12S -65(27) . . . 3_766 ?
C2S C9S C15S C12S 174(14) . . . 3_766 ?
C6S C9S C15S C12S -27(6) . . . 3_766 ?
C8S C9S C15S C12S 0(12) . . . 3_766 ?
C16S C9S C15S C12S 53(7) . . . 3_766 ?
C14S C9S C15S C12S -58(39) . . . 3_766 ?
C4S C9S C15S C12S -163(10) . . . 3_766 ?
C16S C9S C15S C12S 62(12) 3_766 . . 3_766 ?
C8S C9S C15S C12S 86(6) 3_766 . . 3_766 ?
C1S C9S C15S C12S -4(8) 3_766 . . 3_766 ?
C13S C9S C15S C17S -118(27) . . . 3_766 ?
C2S C9S C15S C17S 121(12) . . . 3_766 ?
C6S C9S C15S C17S -80(7) . . . 3_766 ?
C8S C9S C15S C17S -53(12) . . . 3_766 ?
C16S C9S C15S C17S 0(7) . . . 3_766 ?
C14S C9S C15S C17S -111(39) . . . 3_766 ?
C4S C9S C15S C17S 144(8) . . . 3_766 ?
C16S C9S C15S C17S 9(14) 3_766 . . 3_766 ?
C8S C9S C15S C17S 33(6) 3_766 . . 3_766 ?
C12S C9S C15S C17S -53(5) 3_766 . . 3_766 ?
C1S C9S C15S C17S -57(7) 3_766 . . 3_766 ?
C2S C9S C15S C13S -121(35) . . . . ?
C6S C9S C15S C13S 37(30) . . . . ?
C8S C9S C15S C13S 65(24) . . . . ?
C16S C9S C15S C13S 117(27) . . . . ?
C14S C9S C15S C13S 6(26) . . . . ?
C4S C9S C15S C13S -98(31) . . . . ?
C16S C9S C15S C13S 127(31) 3_766 . . . ?
C8S C9S C15S C13S 150(28) 3_766 . . . ?
C12S C9S C15S C13S 65(27) 3_766 . . . ?
C1S C9S C15S C13S 60(31) 3_766 . . . ?
C13S C9S C15S C2S 121(35) . . . . ?
C6S C9S C15S C2S 159(12) . . . . ?
C8S C9S C15S C2S -174(22) . . . . ?
C16S C9S C15S C2S -121(16) . . . . ?
C14S C9S C15S C2S 127(48) . . . . ?
C4S C9S C15S C2S 23(7) . . . . ?
C16S C9S C15S C2S -112(21) 3_766 . . . ?
C8S C9S C15S C2S -88(14) 3_766 . . . ?
C12S C9S C15S C2S -174(14) 3_766 . . . ?
C1S C9S C15S C2S -178(10) 3_766 . . . ?
C13S C9S C15S C18S -75(29) . . . . ?
C2S C9S C15S C18S 163(12) . . . . ?
C6S C9S C15S C18S -38(6) . . . . ?
C8S C9S C15S C18S -11(14) . . . . ?
C16S C9S C15S C18S 42(8) . . . . ?
C14S C9S C15S C18S -69(41) . . . . ?
C4S C9S C15S C18S -174(8) . . . . ?
C16S C9S C15S C18S 51(14) 3_766 . . . ?
C8S C9S C15S C18S 75(7) 3_766 . . . ?
C12S C9S C15S C18S -11(7) 3_766 . . . ?
C1S C9S C15S C18S -15(6) 3_766 . . . ?
C13S C9S C15S C8S -65(24) . . . . ?
C2S C9S C15S C8S 174(22) . . . . ?
C6S C9S C15S C8S -27(14) . . . . ?
C16S C9S C15S C8S 53(9) . . . . ?
C14S C9S C15S C8S -58(35) . . . . ?
C4S C9S C15S C8S -163(18) . . . . ?
C16S C9S C15S C8S 62(13) 3_766 . . . ?
C8S C9S C15S C8S 86(9) 3_766 . . . ?
C12S C9S C15S C8S 0(12) 3_766 . . . ?
C1S C9S C15S C8S -4(16) 3_766 . . . ?
C13S C9S C15S C7S -97(27) . . . 3_766 ?
C2S C9S C15S C7S 142(13) . . . 3_766 ?
C6S C9S C15S C7S -60(6) . . . 3_766 ?
C8S C9S C15S C7S -33(11) . . . 3_766 ?
C16S C9S C15S C7S 20(6) . . . 3_766 ?
C14S C9S C15S C7S -91(39) . . . 3_766 ?
C4S C9S C15S C7S 165(9) . . . 3_766 ?
C16S C9S C15S C7S 29(13) 3_766 . . 3_766 ?
C8S C9S C15S C7S 53(5) 3_766 . . 3_766 ?
C12S C9S C15S C7S -32(5) 3_766 . . 3_766 ?
C1S C9S C15S C7S -37(7) 3_766 . . 3_766 ?
C1S C11S C15S C6S 4(8) 3_766 . . . ?
C17S C11S C15S C6S -110(9) 3_766 . . . ?
C18S C11S C15S C6S -26(10) . . . . ?
C7S C11S C15S C6S -66(7) 3_766 . . . ?
C12S C11S C15S C6S -27(7) 3_766 . . . ?
C5S C11S C15S C6S -41(6) 3_766 . . . ?
C16S C11S C15S C6S -78(6) . . . . ?
C1S C11S C15S C9S 64(13) 3_766 . . . ?
C17S C11S C15S C9S -50(13) 3_766 . . . ?
C18S C11S C15S C9S 34(15) . . . . ?
C7S C11S C15S C9S -6(13) 3_766 . . . ?
C6S C11S C15S C9S 60(10) . . . . ?
C12S C11S C15S C9S 33(11) 3_766 . . . ?
C5S C11S C15S C9S 19(12) 3_766 . . . ?
C16S C11S C15S C9S -18(9) . . . . ?
C17S C11S C15S C1S -114(12) 3_766 . . 3_766 ?
C18S C11S C15S C1S -30(7) . . . 3_766 ?
C7S C11S C15S C1S -70(8) 3_766 . . 3_766 ?
C6S C11S C15S C1S -4(8) . . . 3_766 ?
C12S C11S C15S C1S -32(8) 3_766 . . 3_766 ?
C5S C11S C15S C1S -46(6) 3_766 . . 3_766 ?
C16S C11S C15S C1S -83(9) . . . 3_766 ?
C1S C11S C15S C16S 83(9) 3_766 . . . ?
C17S C11S C15S C16S -32(9) 3_766 . . . ?
C18S C11S C15S C16S 52(10) . . . . ?
C7S C11S C15S C16S 13(8) 3_766 . . . ?
C6S C11S C15S C16S 78(6) . . . . ?
C12S C11S C15S C16S 51(7) 3_766 . . . ?
C5S C11S C15S C16S 37(6) 3_766 . . . ?
C1S C11S C15S C12S 32(8) 3_766 . . 3_766 ?
C17S C11S C15S C12S -83(10) 3_766 . . 3_766 ?
C18S C11S C15S C12S 1(10) . . . 3_766 ?
C7S C11S C15S C12S -39(7) 3_766 . . 3_766 ?
C6S C11S C15S C12S 27(7) . . . 3_766 ?
C5S C11S C15S C12S -14(6) 3_766 . . 3_766 ?
C16S C11S C15S C12S -51(7) . . . 3_766 ?
C1S C11S C15S C17S 114(12) 3_766 . . 3_766 ?
C18S C11S C15S C17S 84(12) . . . 3_766 ?
C7S C11S C15S C17S 44(7) 3_766 . . 3_766 ?
C6S C11S C15S C17S 110(9) . . . 3_766 ?
C12S C11S C15S C17S 83(10) 3_766 . . 3_766 ?
C5S C11S C15S C17S 69(8) 3_766 . . 3_766 ?
C16S C11S C15S C17S 32(9) . . . 3_766 ?
C1S C11S C15S C13S 52(11) 3_766 . . . ?
C17S C11S C15S C13S -63(11) 3_766 . . . ?
C18S C11S C15S C13S 22(13) . . . . ?
C7S C11S C15S C13S -18(10) 3_766 . . . ?
C6S C11S C15S C13S 47(7) . . . . ?
C12S C11S C15S C13S 20(9) 3_766 . . . ?
C5S C11S C15S C13S 6(9) 3_766 . . . ?
C16S C11S C15S C13S -31(7) . . . . ?
C1S C11S C15S C2S 83(12) 3_766 . . . ?
C17S C11S C15S C2S -32(14) 3_766 . . . ?
C18S C11S C15S C2S 52(14) . . . . ?
C7S C11S C15S C2S 12(13) 3_766 . . . ?
C6S C11S C15S C2S 78(10) . . . . ?
C12S C11S C15S C2S 51(11) 3_766 . . . ?
C5S C11S C15S C2S 37(12) 3_766 . . . ?
C16S C11S C15S C2S 0(9) . . . . ?
C1S C11S C15S C18S 30(7) 3_766 . . . ?
C17S C11S C15S C18S -84(12) 3_766 . . . ?
C7S C11S C15S C18S -40(9) 3_766 . . . ?
C6S C11S C15S C18S 26(10) . . . . ?
C12S C11S C15S C18S -1(10) 3_766 . . . ?
C5S C11S C15S C18S -15(8) 3_766 . . . ?
C16S C11S C15S C18S -52(10) . . . . ?
C1S C11S C15S C8S 50(8) 3_766 . . . ?
C17S C11S C15S C8S -65(9) 3_766 . . . ?
C18S C11S C15S C8S 20(10) . . . . ?
C7S C11S C15S C8S -20(7) 3_766 . . . ?
C6S C11S C15S C8S 45(5) . . . . ?
C12S C11S C15S C8S 18(7) 3_766 . . . ?
C5S C11S C15S C8S 4(6) 3_766 . . . ?
C16S C11S C15S C8S -33(4) . . . . ?
C1S C11S C15S C7S 70(8) 3_766 . . 3_766 ?
C17S C11S C15S C7S -44(7) 3_766 . . 3_766 ?
C18S C11S C15S C7S 40(9) . . . 3_766 ?
C6S C11S C15S C7S 66(7) . . . 3_766 ?
C12S C11S C15S C7S 39(7) 3_766 . . 3_766 ?
C5S C11S C15S C7S 24(5) 3_766 . . 3_766 ?
C16S C11S C15S C7S -13(8) . . . 3_766 ?
C9S C13S C15S C6S 142(30) . . . . ?
C2S C13S C15S C6S -178(9) . . . . ?
C14S C13S C15S C6S 123(75) . . . . ?
C8S C13S C15S C6S 42(9) . . . . ?
C16S C13S C15S C6S 104(8) 3_766 . . . ?
C4S C13S C15S C6S -154(7) . . . . ?
C16S C13S C15S C6S 85(7) . . . . ?
C3S C13S C15S C6S 175(7) . . . . ?
C8S C13S C15S C6S 115(7) 3_766 . . . ?
C10S C13S C15S C6S 32(6) 3_766 . . . ?
C2S C13S C15S C9S 40(24) . . . . ?
C14S C13S C15S C9S -18(73) . . . . ?
C8S C13S C15S C9S -99(28) . . . . ?
C16S C13S C15S C9S -38(26) 3_766 . . . ?
C4S C13S C15S C9S 64(26) . . . . ?
C16S C13S C15S C9S -56(27) . . . . ?
C6S C13S C15S C9S -142(30) . . . . ?
C3S C13S C15S C9S 33(26) . . . . ?
C8S C13S C15S C9S -26(26) 3_766 . . . ?
C10S C13S C15S C9S -109(27) 3_766 . . . ?
C9S C13S C15S C1S 123(29) . . . 3_766 ?
C2S C13S C15S C1S 163(9) . . . 3_766 ?
C14S C13S C15S C1S 104(75) . . . 3_766 ?
C8S C13S C15S C1S 23(9) . . . 3_766 ?
C16S C13S C15S C1S 85(8) 3_766 . . 3_766 ?
C4S C13S C15S C1S -173(7) . . . 3_766 ?
C16S C13S C15S C1S 66(7) . . . 3_766 ?
C6S C13S C15S C1S -19(4) . . . 3_766 ?
C3S C13S C15S C1S 156(6) . . . 3_766 ?
C8S C13S C15S C1S 97(7) 3_766 . . 3_766 ?
C10S C13S C15S C1S 13(6) 3_766 . . 3_766 ?
C9S C13S C15S C11S 95(29) . . . . ?
C2S C13S C15S C11S 135(9) . . . . ?
C14S C13S C15S C11S 77(76) . . . . ?
C8S C13S C15S C11S -4(10) . . . . ?
C16S C13S C15S C11S 58(10) 3_766 . . . ?
C4S C13S C15S C11S 159(8) . . . . ?
C16S C13S C15S C11S 39(8) . . . . ?
C6S C13S C15S C11S -46(6) . . . . ?
C3S C13S C15S C11S 128(8) . . . . ?
C8S C13S C15S C11S 69(8) 3_766 . . . ?
C10S C13S C15S C11S -14(8) 3_766 . . . ?
C9S C13S C15S C16S 56(27) . . . . ?
C2S C13S C15S C16S 96(8) . . . . ?
C14S C13S C15S C16S 38(75) . . . . ?
C8S C13S C15S C16S -43(6) . . . . ?
C16S C13S C15S C16S 19(8) 3_766 . . . ?
C4S C13S C15S C16S 121(7) . . . . ?
C6S C13S C15S C16S -85(7) . . . . ?
C3S C13S C15S C16S 90(6) . . . . ?
C8S C13S C15S C16S 30(4) 3_766 . . . ?
C10S C13S C15S C16S -53(5) 3_766 . . . ?
C9S C13S C15S C12S 113(28) . . . 3_766 ?
C2S C13S C15S C12S 153(8) . . . 3_766 ?
C14S C13S C15S C12S 95(76) . . . 3_766 ?
C8S C13S C15S C12S 14(8) . . . 3_766 ?
C16S C13S C15S C12S 76(8) 3_766 . . 3_766 ?
C4S C13S C15S C12S 177(7) . . . 3_766 ?
C16S C13S C15S C12S 57(6) . . . 3_766 ?
C6S C13S C15S C12S -28(6) . . . 3_766 ?
C3S C13S C15S C12S 146(6) . . . 3_766 ?
C8S C13S C15S C12S 87(6) 3_766 . . 3_766 ?
C10S C13S C15S C12S 4(5) 3_766 . . 3_766 ?
C9S C13S C15S C17S 66(27) . . . 3_766 ?
C2S C13S C15S C17S 106(8) . . . 3_766 ?
C14S C13S C15S C17S 47(77) . . . 3_766 ?
C8S C13S C15S C17S -33(7) . . . 3_766 ?
C16S C13S C15S C17S 28(8) 3_766 . . 3_766 ?
C4S C13S C15S C17S 130(6) . . . 3_766 ?
C16S C13S C15S C17S 9(5) . . . 3_766 ?
C6S C13S C15S C17S -76(6) . . . 3_766 ?
C3S C13S C15S C17S 99(6) . . . 3_766 ?
C8S C13S C15S C17S 40(5) 3_766 . . 3_766 ?
C10S C13S C15S C17S -43(5) 3_766 . . 3_766 ?
C9S C13S C15S C2S -40(24) . . . . ?
C14S C13S C15S C2S -58(73) . . . . ?
C8S C13S C15S C2S -139(10) . . . . ?
C16S C13S C15S C2S -78(7) 3_766 . . . ?
C4S C13S C15S C2S 24(4) . . . . ?
C16S C13S C15S C2S -96(8) . . . . ?
C6S C13S C15S C2S 178(9) . . . . ?
C3S C13S C15S C2S -7(5) . . . . ?
C8S C13S C15S C2S -66(6) 3_766 . . . ?
C10S C13S C15S C2S -149(8) 3_766 . . . ?
C9S C13S C15S C18S 107(28) . . . . ?
C2S C13S C15S C18S 147(8) . . . . ?
C14S C13S C15S C18S 88(76) . . . . ?
C8S C13S C15S C18S 7(8) . . . . ?
C16S C13S C15S C18S 69(8) 3_766 . . . ?
C4S C13S C15S C18S 171(6) . . . . ?
C16S C13S C15S C18S 50(6) . . . . ?
C6S C13S C15S C18S -35(6) . . . . ?
C3S C13S C15S C18S 140(6) . . . . ?
C8S C13S C15S C18S 81(6) 3_766 . . . ?
C10S C13S C15S C18S -3(6) 3_766 . . . ?
C9S C13S C15S C8S 99(28) . . . . ?
C2S C13S C15S C8S 139(10) . . . . ?
C14S C13S C15S C8S 81(77) . . . . ?
C16S C13S C15S C8S 62(9) 3_766 . . . ?
C4S C13S C15S C8S 163(9) . . . . ?
C16S C13S C15S C8S 43(6) . . . . ?
C6S C13S C15S C8S -42(9) . . . . ?
C3S C13S C15S C8S 132(8) . . . . ?
C8S C13S C15S C8S 73(5) 3_766 . . . ?
C10S C13S C15S C8S -10(6) 3_766 . . . ?
C9S C13S C15S C7S 83(27) . . . 3_766 ?
C2S C13S C15S C7S 123(7) . . . 3_766 ?
C14S C13S C15S C7S 65(76) . . . 3_766 ?
C8S C13S C15S C7S -16(7) . . . 3_766 ?
C16S C13S C15S C7S 46(7) 3_766 . . 3_766 ?
C4S C13S C15S C7S 147(6) . . . 3_766 ?
C16S C13S C15S C7S 27(5) . . . 3_766 ?
C6S C13S C15S C7S -58(6) . . . 3_766 ?
C3S C13S C15S C7S 116(5) . . . 3_766 ?
C8S C13S C15S C7S 57(4) 3_766 . . 3_766 ?
C10S C13S C15S C7S -26(4) 3_766 . . 3_766 ?
C13S C2S C15S C6S 1(9) . . . . ?
C4S C2S C15S C6S -100(10) . . . . ?
C9S C2S C15S C6S 21(12) . . . . ?
C14S C2S C15S C6S 7(10) . . . . ?
C16S C2S C15S C6S 59(10) 3_766 . . . ?
C3S C2S C15S C6S 163(10) . . . . ?
C8S C2S C15S C6S 25(8) . . . . ?
C10S C2S C15S C6S 123(8) . . . . ?
C8S C2S C15S C6S 97(7) 3_766 . . . ?
C16S C2S C15S C6S 70(7) . . . . ?
C7S C2S C15S C6S 74(16) . . . . ?
C13S C2S C15S C9S -20(15) . . . . ?
C4S C2S C15S C9S -121(17) . . . . ?
C14S C2S C15S C9S -15(16) . . . . ?
C16S C2S C15S C9S 37(16) 3_766 . . . ?
C3S C2S C15S C9S 142(16) . . . . ?
C8S C2S C15S C9S 4(15) . . . . ?
C10S C2S C15S C9S 102(15) . . . . ?
C8S C2S C15S C9S 75(15) 3_766 . . . ?
C16S C2S C15S C9S 49(14) . . . . ?
C7S C2S C15S C9S 52(21) . . . . ?
C13S C2S C15S C1S -22(11) . . . 3_766 ?
C4S C2S C15S C1S -123(11) . . . 3_766 ?
C9S C2S C15S C1S -2(13) . . . 3_766 ?
C14S C2S C15S C1S -17(12) . . . 3_766 ?
C16S C2S C15S C1S 35(12) 3_766 . . 3_766 ?
C3S C2S C15S C1S 140(10) . . . 3_766 ?
C8S C2S C15S C1S 2(10) . . . 3_766 ?
C10S C2S C15S C1S 100(10) . . . 3_766 ?
C8S C2S C15S C1S 73(10) 3_766 . . 3_766 ?
C16S C2S C15S C1S 47(9) . . . 3_766 ?
C7S C2S C15S C1S 50(18) . . . 3_766 ?
C13S C2S C15S C11S -68(13) . . . . ?
C4S C2S C15S C11S -170(11) . . . . ?
C9S C2S C15S C11S -49(14) . . . . ?
C14S C2S C15S C11S -63(13) . . . . ?
C16S C2S C15S C11S -11(13) 3_766 . . . ?
C3S C2S C15S C11S 93(12) . . . . ?
C8S C2S C15S C11S -45(11) . . . . ?
C10S C2S C15S C11S 53(12) . . . . ?
C8S C2S C15S C11S 27(11) 3_766 . . . ?
C16S C2S C15S C11S 0(10) . . . . ?
C7S C2S C15S C11S 4(20) . . . . ?
C13S C2S C15S C16S -69(8) . . . . ?
C4S C2S C15S C16S -170(10) . . . . ?
C9S C2S C15S C16S -49(14) . . . . ?
C14S C2S C15S C16S -63(8) . . . . ?
C16S C2S C15S C16S -11(10) 3_766 . . . ?
C3S C2S C15S C16S 93(11) . . . . ?
C8S C2S C15S C16S -45(5) . . . . ?
C10S C2S C15S C16S 53(6) . . . . ?
C8S C2S C15S C16S 27(5) 3_766 . . . ?
C7S C2S C15S C16S 4(13) . . . . ?
C13S C2S C15S C12S -26(8) . . . 3_766 ?
C4S C2S C15S C12S -127(9) . . . 3_766 ?
C9S C2S C15S C12S -6(13) . . . 3_766 ?
C14S C2S C15S C12S -21(8) . . . 3_766 ?
C16S C2S C15S C12S 31(8) 3_766 . . 3_766 ?
C3S C2S C15S C12S 136(10) . . . 3_766 ?
C8S C2S C15S C12S -2(7) . . . 3_766 ?
C10S C2S C15S C12S 96(7) . . . 3_766 ?
C8S C2S C15S C12S 69(6) 3_766 . . 3_766 ?
C16S C2S C15S C12S 43(6) . . . 3_766 ?
C7S C2S C15S C12S 47(15) . . . 3_766 ?
C13S C2S C15S C17S -86(8) . . . 3_766 ?
C4S C2S C15S C17S 173(8) . . . 3_766 ?
C9S C2S C15S C17S -66(14) . . . 3_766 ?
C14S C2S C15S C17S -81(8) . . . 3_766 ?
C16S C2S C15S C17S -29(8) 3_766 . . 3_766 ?
C3S C2S C15S C17S 76(10) . . . 3_766 ?
C8S C2S C15S C17S -62(6) . . . 3_766 ?
C10S C2S C15S C17S 35(6) . . . 3_766 ?
C8S C2S C15S C17S 9(5) 3_766 . . 3_766 ?
C16S C2S C15S C17S -17(6) . . . 3_766 ?
C7S C2S C15S C17S -14(15) . . . 3_766 ?
C4S C2S C15S C13S -101(12) . . . . ?
C9S C2S C15S C13S 20(15) . . . . ?
C14S C2S C15S C13S 5(8) . . . . ?
C16S C2S C15S C13S 57(8) 3_766 . . . ?
C3S C2S C15S C13S 162(13) . . . . ?
C8S C2S C15S C13S 24(7) . . . . ?
C10S C2S C15S C13S 121(8) . . . . ?
C8S C2S C15S C13S 95(7) 3_766 . . . ?
C16S C2S C15S C13S 69(8) . . . . ?
C7S C2S C15S C13S 72(13) . . . . ?
C13S C2S C15S C18S -39(10) . . . . ?
C4S C2S C15S C18S -140(10) . . . . ?
C9S C2S C15S C18S -19(14) . . . . ?
C14S C2S C15S C18S -34(11) . . . . ?
C16S C2S C15S C18S 18(10) 3_766 . . . ?
C3S C2S C15S C18S 122(10) . . . . ?
C8S C2S C15S C18S -15(9) . . . . ?
C10S C2S C15S C18S 82(9) . . . . ?
C8S C2S C15S C18S 56(8) 3_766 . . . ?
C16S C2S C15S C18S 30(8) . . . . ?
C7S C2S C15S C18S 33(16) . . . . ?
C13S C2S C15S C8S -24(7) . . . . ?
C4S C2S C15S C8S -125(11) . . . . ?
C9S C2S C15S C8S -4(15) . . . . ?
C14S C2S C15S C8S -19(7) . . . . ?
C16S C2S C15S C8S 33(8) 3_766 . . . ?
C3S C2S C15S C8S 138(11) . . . . ?
C10S C2S C15S C8S 98(6) . . . . ?
C8S C2S C15S C8S 71(5) 3_766 . . . ?
C16S C2S C15S C8S 45(5) . . . . ?
C7S C2S C15S C8S 48(12) . . . . ?
C13S C2S C15S C7S -60(8) . . . 3_766 ?
C4S C2S C15S C7S -161(9) . . . 3_766 ?
C9S C2S C15S C7S -40(14) . . . 3_766 ?
C14S C2S C15S C7S -55(8) . . . 3_766 ?
C16S C2S C15S C7S -3(7) 3_766 . . 3_766 ?
C3S C2S C15S C7S 101(10) . . . 3_766 ?
C8S C2S C15S C7S -36(6) . . . 3_766 ?
C10S C2S C15S C7S 61(6) . . . 3_766 ?
C8S C2S C15S C7S 35(5) 3_766 . . 3_766 ?
C16S C2S C15S C7S 9(6) . . . 3_766 ?
C7S C2S C15S C7S 12(15) . . . 3_766 ?
C13S C8S C15S C6S -128(12) . . . . ?
C16S C8S C15S C6S 173(14) 3_766 . . . ?
C10S C8S C15S C6S 36(9) 3_766 . . . ?
C14S C8S C15S C6S -133(12) . . . . ?
C9S C8S C15S C6S -147(18) . . . . ?
C16S C8S C15S C6S 116(12) . . . . ?
C2S C8S C15S C6S -149(12) . . . . ?
C12S C8S C15S C6S 33(9) 3_766 . . . ?
C2S C8S C15S C6S 104(10) 3_766 . . . ?
C9S C8S C15S C6S 130(11) 3_766 . . . ?
C8S C8S C15S C6S 146(13) 3_766 . . . ?
C13S C8S C15S C9S 18(10) . . . . ?
C16S C8S C15S C9S -41(11) 3_766 . . . ?
C10S C8S C15S C9S -177(15) 3_766 . . . ?
C14S C8S C15S C9S 13(10) . . . . ?
C16S C8S C15S C9S -97(10) . . . . ?
C2S C8S C15S C9S -2(9) . . . . ?
C12S C8S C15S C9S -180(15) 3_766 . . . ?
C6S C8S C15S C9S 147(18) . . . . ?
C2S C8S C15S C9S -110(11) 3_766 . . . ?
C9S C8S C15S C9S -84(11) 3_766 . . . ?
C8S C8S C15S C9S -67(10) 3_766 . . . ?
C13S C8S C15S C1S -158(9) . . . 3_766 ?
C16S C8S C15S C1S 143(11) 3_766 . . 3_766 ?
C10S C8S C15S C1S 7(8) 3_766 . . 3_766 ?
C14S C8S C15S C1S -163(8) . . . 3_766 ?
C9S C8S C15S C1S -176(15) . . . 3_766 ?
C16S C8S C15S C1S 87(8) . . . 3_766 ?
C2S C8S C15S C1S -178(8) . . . 3_766 ?
C12S C8S C15S C1S 4(7) 3_766 . . 3_766 ?
C6S C8S C15S C1S -29(6) . . . 3_766 ?
C2S C8S C15S C1S 74(6) 3_766 . . 3_766 ?
C9S C8S C15S C1S 100(7) 3_766 . . 3_766 ?
C8S C8S C15S C1S 117(9) 3_766 . . 3_766 ?
C13S C8S C15S C11S 177(8) . . . . ?
C16S C8S C15S C11S 118(10) 3_766 . . . ?
C10S C8S C15S C11S -19(8) 3_766 . . . ?
C14S C8S C15S C11S 172(7) . . . . ?
C9S C8S C15S C11S 158(14) . . . . ?
C16S C8S C15S C11S 62(7) . . . . ?
C2S C8S C15S C11S 156(7) . . . . ?
C12S C8S C15S C11S -21(7) 3_766 . . . ?
C6S C8S C15S C11S -55(8) . . . . ?
C2S C8S C15S C11S 49(5) 3_766 . . . ?
C9S C8S C15S C11S 75(7) 3_766 . . . ?
C8S C8S C15S C11S 91(8) 3_766 . . . ?
C13S C8S C15S C16S 115(6) . . . . ?
C16S C8S C15S C16S 56(7) 3_766 . . . ?
C10S C8S C15S C16S -80(10) 3_766 . . . ?
C14S C8S C15S C16S 110(6) . . . . ?
C9S C8S C15S C16S 97(10) . . . . ?
C2S C8S C15S C16S 94(5) . . . . ?
C12S C8S C15S C16S -83(10) 3_766 . . . ?
C6S C8S C15S C16S -116(12) . . . . ?
C2S C8S C15S C16S -13(5) 3_766 . . . ?
C9S C8S C15S C16S 13(5) 3_766 . . . ?
C8S C8S C15S C16S 30(5) 3_766 . . . ?
C13S C8S C15S C12S -162(10) . . . 3_766 ?
C16S C8S C15S C12S 139(14) 3_766 . . 3_766 ?
C10S C8S C15S C12S 3(7) 3_766 . . 3_766 ?
C14S C8S C15S C12S -167(11) . . . 3_766 ?
C9S C8S C15S C12S 180(15) . . . 3_766 ?
C16S C8S C15S C12S 83(10) . . . 3_766 ?
C2S C8S C15S C12S 178(9) . . . 3_766 ?
C6S C8S C15S C12S -33(9) . . . 3_766 ?
C2S C8S C15S C12S 70(8) 3_766 . . 3_766 ?
C9S C8S C15S C12S 96(10) 3_766 . . 3_766 ?
C8S C8S C15S C12S 113(12) 3_766 . . 3_766 ?
C13S C8S C15S C17S 150(7) . . . 3_766 ?
C16S C8S C15S C17S 91(10) 3_766 . . 3_766 ?
C10S C8S C15S C17S -46(7) 3_766 . . 3_766 ?
C14S C8S C15S C17S 145(7) . . . 3_766 ?
C9S C8S C15S C17S 131(12) . . . 3_766 ?
C16S C8S C15S C17S 35(6) . . . 3_766 ?
C2S C8S C15S C17S 129(5) . . . 3_766 ?
C12S C8S C15S C17S -48(7) 3_766 . . 3_766 ?
C6S C8S C15S C17S -82(10) . . . 3_766 ?
C2S C8S C15S C17S 22(4) 3_766 . . 3_766 ?
C9S C8S C15S C17S 48(6) 3_766 . . 3_766 ?
C8S C8S C15S C17S 64(7) 3_766 . . 3_766 ?
C16S C8S C15S C13S -59(8) 3_766 . . . ?
C10S C8S C15S C13S 164(11) 3_766 . . . ?
C14S C8S C15S C13S -5(6) . . . . ?
C9S C8S C15S C13S -18(10) . . . . ?
C16S C8S C15S C13S -115(6) . . . . ?
C2S C8S C15S C13S -21(5) . . . . ?
C12S C8S C15S C13S 162(10) 3_766 . . . ?
C6S C8S C15S C13S 128(12) . . . . ?
C2S C8S C15S C13S -128(6) 3_766 . . . ?
C9S C8S C15S C13S -102(6) 3_766 . . . ?
C8S C8S C15S C13S -86(6) 3_766 . . . ?
C13S C8S C15S C2S 21(5) . . . . ?
C16S C8S C15S C2S -38(8) 3_766 . . . ?
C10S C8S C15S C2S -175(9) 3_766 . . . ?
C14S C8S C15S C2S 16(5) . . . . ?
C9S C8S C15S C2S 2(9) . . . . ?
C16S C8S C15S C2S -94(5) . . . . ?
C12S C8S C15S C2S -178(9) 3_766 . . . ?
C6S C8S C15S C2S 149(12) . . . . ?
C2S C8S C15S C2S -107(4) 3_766 . . . ?
C9S C8S C15S C2S -81(5) 3_766 . . . ?
C8S C8S C15S C2S -65(5) 3_766 . . . ?
C13S C8S C15S C18S -173(8) . . . . ?
C16S C8S C15S C18S 128(11) 3_766 . . . ?
C10S C8S C15S C18S -8(7) 3_766 . . . ?
C14S C8S C15S C18S -178(8) . . . . ?
C9S C8S C15S C18S 169(14) . . . . ?
C16S C8S C15S C18S 72(8) . . . . ?
C2S C8S C15S C18S 167(7) . . . . ?
C12S C8S C15S C18S -11(8) 3_766 . . . ?
C6S C8S C15S C18S -44(8) . . . . ?
C2S C8S C15S C18S 59(6) 3_766 . . . ?
C9S C8S C15S C18S 85(7) 3_766 . . . ?
C8S C8S C15S C18S 102(9) 3_766 . . . ?
C13S C8S C15S C7S 162(7) . . . 3_766 ?
C16S C8S C15S C7S 103(11) 3_766 . . 3_766 ?
C10S C8S C15S C7S -33(6) 3_766 . . 3_766 ?
C14S C8S C15S C7S 157(7) . . . 3_766 ?
C9S C8S C15S C7S 144(12) . . . 3_766 ?
C16S C8S C15S C7S 47(6) . . . 3_766 ?
C2S C8S C15S C7S 142(6) . . . 3_766 ?
C12S C8S C15S C7S -36(7) 3_766 . . 3_766 ?
C6S C8S C15S C7S -69(9) . . . 3_766 ?
C2S C8S C15S C7S 34(4) 3_766 . . 3_766 ?
C9S C8S C15S C7S 60(6) 3_766 . . 3_766 ?
C8S C8S C15S C7S 77(8) 3_766 . . 3_766 ?
C13S C8S C16S C14S 145(17) . . . 3_766 ?
C16S C8S C16S C14S 78(20) 3_766 . . 3_766 ?
C10S C8S C16S C14S -70(18) 3_766 . . 3_766 ?
C14S C8S C16S C14S 109(16) . . . 3_766 ?
C9S C8S C16S C14S 168(18) . . . 3_766 ?
C2S C8S C16S C14S 136(17) . . . 3_766 ?
C12S C8S C16S C14S -98(17) 3_766 . . 3_766 ?
C6S C8S C16S C14S -139(17) . . . 3_766 ?
C2S C8S C16S C14S 0(14) 3_766 . . 3_766 ?
C9S C8S C16S C14S 33(16) 3_766 . . 3_766 ?
C8S C8S C16S C14S 78(20) 3_766 . . 3_766 ?
C13S C8S C16S C8S 67(8) . . . 3_766 ?
C16S C8S C16S C8S 0.005(16) 3_766 . . 3_766 ?
C10S C8S C16S C8S -149(10) 3_766 . . 3_766 ?
C14S C8S C16S C8S 31(9) . . . 3_766 ?
C9S C8S C16S C8S 90(6) . . . 3_766 ?
C2S C8S C16S C8S 58(5) . . . 3_766 ?
C12S C8S C16S C8S -176(10) 3_766 . . 3_766 ?
C6S C8S C16S C8S 143(8) . . . 3_766 ?
C2S C8S C16S C8S -79(8) 3_766 . . 3_766 ?
C9S C8S C16S C8S -46(5) 3_766 . . 3_766 ?
C13S C8S C16S C13S 118(7) . . . 3_766 ?
C16S C8S C16S C13S 51(8) 3_766 . . 3_766 ?
C10S C8S C16S C13S -97(8) 3_766 . . 3_766 ?
C14S C8S C16S C13S 82(10) . . . 3_766 ?
C9S C8S C16S C13S 141(7) . . . 3_766 ?
C2S C8S C16S C13S 109(6) . . . 3_766 ?
C12S C8S C16S C13S -125(7) 3_766 . . 3_766 ?
C6S C8S C16S C13S -166(6) . . . 3_766 ?
C2S C8S C16S C13S -27(5) 3_766 . . 3_766 ?
C9S C8S C16S C13S 5(5) 3_766 . . 3_766 ?
C8S C8S C16S C13S 51(8) 3_766 . . 3_766 ?
C13S C8S C16S C2S 145(8) . . . 3_766 ?
C16S C8S C16S C2S 79(8) 3_766 . . 3_766 ?
C10S C8S C16S C2S -70(7) 3_766 . . 3_766 ?
C14S C8S C16S C2S 109(9) . . . 3_766 ?
C9S C8S C16S C2S 168(6) . . . 3_766 ?
C2S C8S C16S C2S 137(5) . . . 3_766 ?
C12S C8S C16S C2S -98(6) 3_766 . . 3_766 ?
C6S C8S C16S C2S -138(5) . . . 3_766 ?
C9S C8S C16S C2S 33(3) 3_766 . . 3_766 ?
C8S C8S C16S C2S 79(8) 3_766 . . 3_766 ?
C13S C8S C16S C9S -23(6) . . . . ?
C16S C8S C16S C9S -90(6) 3_766 . . . ?
C10S C8S C16S C9S 122(8) 3_766 . . . ?
C14S C8S C16S C9S -59(9) . . . . ?
C2S C8S C16S C9S -31(3) . . . . ?
C12S C8S C16S C9S 94(7) 3_766 . . . ?
C6S C8S C16S C9S 53(4) . . . . ?
C2S C8S C16S C9S -168(6) 3_766 . . . ?
C9S C8S C16S C9S -135(4) 3_766 . . . ?
C8S C8S C16S C9S -90(6) 3_766 . . . ?
C13S C8S C16S C16S 67(8) . . . 3_766 ?
C10S C8S C16S C16S -149(10) 3_766 . . 3_766 ?
C14S C8S C16S C16S 31(9) . . . 3_766 ?
C9S C8S C16S C16S 90(6) . . . 3_766 ?
C2S C8S C16S C16S 58(5) . . . 3_766 ?
C12S C8S C16S C16S -176(10) 3_766 . . 3_766 ?
C6S C8S C16S C16S 143(8) . . . 3_766 ?
C2S C8S C16S C16S -79(8) 3_766 . . 3_766 ?
C9S C8S C16S C16S -46(5) 3_766 . . 3_766 ?
C8S C8S C16S C16S 0.00(2) 3_766 . . 3_766 ?
C13S C8S C16S C9S 113(7) . . . 3_766 ?
C16S C8S C16S C9S 46(5) 3_766 . . 3_766 ?
C10S C8S C16S C9S -103(7) 3_766 . . 3_766 ?
C14S C8S C16S C9S 77(9) . . . 3_766 ?
C9S C8S C16S C9S 135(4) . . . 3_766 ?
C2S C8S C16S C9S 104(4) . . . 3_766 ?
C12S C8S C16S C9S -131(6) 3_766 . . 3_766 ?
C6S C8S C16S C9S -171(4) . . . 3_766 ?
C2S C8S C16S C9S -33(3) 3_766 . . 3_766 ?
C8S C8S C16S C9S 46(5) 3_766 . . 3_766 ?
C13S C8S C16S C7S -133(9) . . . 3_766 ?
C16S C8S C16S C7S 160(11) 3_766 . . 3_766 ?
C10S C8S C16S C7S 12(9) 3_766 . . 3_766 ?
C14S C8S C16S C7S -169(9) . . . 3_766 ?
C9S C8S C16S C7S -110(8) . . . 3_766 ?
C2S C8S C16S C7S -142(7) . . . 3_766 ?
C12S C8S C16S C7S -16(8) 3_766 . . 3_766 ?
C6S C8S C16S C7S -57(7) . . . 3_766 ?
C2S C8S C16S C7S 81(6) 3_766 . . 3_766 ?
C9S C8S C16S C7S 114(7) 3_766 . . 3_766 ?
C8S C8S C16S C7S 160(11) 3_766 . . 3_766 ?
C13S C8S C16S C10S -145(11) . . . 3_766 ?
C16S C8S C16S C10S 149(10) 3_766 . . 3_766 ?
C14S C8S C16S C10S 179(13) . . . 3_766 ?
C9S C8S C16S C10S -122(8) . . . 3_766 ?
C2S C8S C16S C10S -153(8) . . . 3_766 ?
C12S C8S C16S C10S -28(6) 3_766 . . 3_766 ?
C6S C8S C16S C10S -68(6) . . . 3_766 ?
C2S C8S C16S C10S 70(7) 3_766 . . 3_766 ?
C9S C8S C16S C10S 103(7) 3_766 . . 3_766 ?
C8S C8S C16S C10S 149(10) 3_766 . . 3_766 ?
C16S C8S C16S C13S -67(8) 3_766 . . . ?
C10S C8S C16S C13S 145(11) 3_766 . . . ?
C14S C8S C16S C13S -36(7) . . . . ?
C9S C8S C16S C13S 23(6) . . . . ?
C2S C8S C16S C13S -9(5) . . . . ?
C12S C8S C16S C13S 117(9) 3_766 . . . ?
C6S C8S C16S C13S 76(7) . . . . ?
C2S C8S C16S C13S -145(8) 3_766 . . . ?
C9S C8S C16S C13S -113(7) 3_766 . . . ?
C8S C8S C16S C13S -67(8) 3_766 . . . ?
C13S C8S C16S C17S -104(10) . . . 3_766 ?
C16S C8S C16S C17S -171(12) 3_766 . . 3_766 ?
C10S C8S C16S C17S 41(11) 3_766 . . 3_766 ?
C14S C8S C16S C17S -140(10) . . . 3_766 ?
C9S C8S C16S C17S -81(10) . . . 3_766 ?
C2S C8S C16S C17S -113(8) . . . 3_766 ?
C12S C8S C16S C17S 13(9) 3_766 . . 3_766 ?
C6S C8S C16S C17S -28(9) . . . 3_766 ?
C2S C8S C16S C17S 110(9) 3_766 . . 3_766 ?
C9S C8S C16S C17S 143(9) 3_766 . . 3_766 ?
C8S C8S C16S C17S -171(12) 3_766 . . 3_766 ?
C13S C9S C16S C14S -135(21) . . . 3_766 ?
C2S C9S C16S C14S -79(22) . . . 3_766 ?
C15S C9S C16S C14S 65(22) . . . 3_766 ?
C6S C9S C16S C14S 107(21) . . . 3_766 ?
C8S C9S C16S C14S -165(23) . . . 3_766 ?
C14S C9S C16S C14S -126(20) . . . 3_766 ?
C4S C9S C16S C14S -86(22) . . . 3_766 ?
C16S C9S C16S C14S -109(24) 3_766 . . 3_766 ?
C8S C9S C16S C14S -57(21) 3_766 . . 3_766 ?
C12S C9S C16S C14S 127(22) 3_766 . . 3_766 ?
C1S C9S C16S C14S 97(21) 3_766 . . 3_766 ?
C13S C9S C16S C8S -78(12) . . . 3_766 ?
C2S C9S C16S C8S -22(12) . . . 3_766 ?
C15S C9S C16S C8S 122(10) . . . 3_766 ?
C6S C9S C16S C8S 164(10) . . . 3_766 ?
C8S C9S C16S C8S -108(7) . . . 3_766 ?
C14S C9S C16S C8S -69(10) . . . 3_766 ?
C4S C9S C16S C8S -29(12) . . . 3_766 ?
C16S C9S C16S C8S -52(7) 3_766 . . 3_766 ?
C12S C9S C16S C8S -176(12) 3_766 . . 3_766 ?
C1S C9S C16S C8S 154(10) 3_766 . . 3_766 ?
C13S C9S C16S C13S -54(18) . . . 3_766 ?
C2S C9S C16S C13S 3(18) . . . 3_766 ?
C15S C9S C16S C13S 147(16) . . . 3_766 ?
C6S C9S C16S C13S -171(16) . . . 3_766 ?
C8S C9S C16S C13S -83(15) . . . 3_766 ?
C14S C9S C16S C13S -45(17) . . . 3_766 ?
C4S C9S C16S C13S -5(19) . . . 3_766 ?
C16S C9S C16S C13S -27(10) 3_766 . . 3_766 ?
C8S C9S C16S C13S 25(11) 3_766 . . 3_766 ?
C12S C9S C16S C13S -151(19) 3_766 . . 3_766 ?
C1S C9S C16S C13S 179(17) 3_766 . . 3_766 ?
C13S C9S C16S C8S 30(9) . . . . ?
C2S C9S C16S C8S 86(8) . . . . ?
C15S C9S C16S C8S -130(8) . . . . ?
C6S C9S C16S C8S -88(7) . . . . ?
C14S C9S C16S C8S 39(6) . . . . ?
C4S C9S C16S C8S 79(8) . . . . ?
C16S C9S C16S C8S 56(7) 3_766 . . . ?
C8S C9S C16S C8S 108(7) 3_766 . . . ?
C12S C9S C16S C8S -67(7) 3_766 . . . ?
C1S C9S C16S C8S -98(7) 3_766 . . . ?
C13S C9S C16S C2S 8(17) . . . 3_766 ?
C2S C9S C16S C2S 64(17) . . . 3_766 ?
C15S C9S C16S C2S -152(14) . . . 3_766 ?
C6S C9S C16S C2S -110(15) . . . 3_766 ?
C8S C9S C16S C2S -22(13) . . . 3_766 ?
C14S C9S C16S C2S 17(16) . . . 3_766 ?
C4S C9S C16S C2S 57(17) . . . 3_766 ?
C16S C9S C16S C2S 34(10) 3_766 . . 3_766 ?
C8S C9S C16S C2S 86(14) 3_766 . . 3_766 ?
C12S C9S C16S C2S -90(15) 3_766 . . 3_766 ?
C1S C9S C16S C2S -120(15) 3_766 . . 3_766 ?
C13S C9S C16S C16S -26(10) . . . 3_766 ?
C2S C9S C16S C16S 30(10) . . . 3_766 ?
C15S C9S C16S C16S 174(9) . . . 3_766 ?
C6S C9S C16S C16S -144(9) . . . 3_766 ?
C8S C9S C16S C16S -56(7) . . . 3_766 ?
C14S C9S C16S C16S -17(9) . . . 3_766 ?
C4S C9S C16S C16S 23(11) . . . 3_766 ?
C8S C9S C16S C16S 52(7) 3_766 . . 3_766 ?
C12S C9S C16S C16S -123(11) 3_766 . . 3_766 ?
C1S C9S C16S C16S -154(9) 3_766 . . 3_766 ?
C13S C9S C16S C9S -26(10) . . . 3_766 ?
C2S C9S C16S C9S 30(10) . . . 3_766 ?
C15S C9S C16S C9S 174(9) . . . 3_766 ?
C6S C9S C16S C9S -144(9) . . . 3_766 ?
C8S C9S C16S C9S -56(7) . . . 3_766 ?
C14S C9S C16S C9S -17(9) . . . 3_766 ?
C4S C9S C16S C9S 23(11) . . . 3_766 ?
C16S C9S C16S C9S -0.002(17) 3_766 . . 3_766 ?
C8S C9S C16S C9S 52(7) 3_766 . . 3_766 ?
C12S C9S C16S C9S -123(11) 3_766 . . 3_766 ?
C1S C9S C16S C9S -154(9) 3_766 . . 3_766 ?
C13S C9S C16S C7S 127(10) . . . 3_766 ?
C2S C9S C16S C7S -177(8) . . . 3_766 ?
C15S C9S C16S C7S -33(10) . . . 3_766 ?
C6S C9S C16S C7S 9(9) . . . 3_766 ?
C8S C9S C16S C7S 97(11) . . . 3_766 ?
C14S C9S C16S C7S 136(8) . . . 3_766 ?
C4S C9S C16S C7S 176(7) . . . 3_766 ?
C16S C9S C16S C7S 153(15) 3_766 . . 3_766 ?
C8S C9S C16S C7S -154(16) 3_766 . . 3_766 ?
C12S C9S C16S C7S 30(6) 3_766 . . 3_766 ?
C1S C9S C16S C7S 0(7) 3_766 . . 3_766 ?
C13S C9S C16S C10S 71(8) . . . 3_766 ?
C2S C9S C16S C10S 127(7) . . . 3_766 ?
C15S C9S C16S C10S -89(7) . . . 3_766 ?
C6S C9S C16S C10S -47(6) . . . 3_766 ?
C8S C9S C16S C10S 41(7) . . . 3_766 ?
C14S C9S C16S C10S 80(6) . . . 3_766 ?
C4S C9S C16S C10S 120(6) . . . 3_766 ?
C16S C9S C16S C10S 97(10) 3_766 . . 3_766 ?
C8S C9S C16S C10S 150(12) 3_766 . . 3_766 ?
C12S C9S C16S C10S -26(4) 3_766 . . 3_766 ?
C1S C9S C16S C10S -57(5) 3_766 . . 3_766 ?
C2S C9S C16S C13S 56(6) . . . . ?
C15S C9S C16S C13S -160(10) . . . . ?
C6S C9S C16S C13S -118(8) . . . . ?
C8S C9S C16S C13S -30(9) . . . . ?
C14S C9S C16S C13S 9(6) . . . . ?
C4S C9S C16S C13S 49(6) . . . . ?
C16S C9S C16S C13S 26(10) 3_766 . . . ?
C8S C9S C16S C13S 78(12) 3_766 . . . ?
C12S C9S C16S C13S -97(8) 3_766 . . . ?
C1S C9S C16S C13S -128(8) 3_766 . . . ?
C13S C9S C16S C17S 160(8) . . . 3_766 ?
C2S C9S C16S C17S -144(6) . . . 3_766 ?
C15S C9S C16S C17S 0(7) . . . 3_766 ?
C6S C9S C16S C17S 42(6) . . . 3_766 ?
C8S C9S C16S C17S 130(9) . . . 3_766 ?
C14S C9S C16S C17S 169(5) . . . 3_766 ?
C4S C9S C16S C17S -151(5) . . . 3_766 ?
C16S C9S C16S C17S -174(12) 3_766 . . 3_766 ?
C8S C9S C16S C17S -122(13) 3_766 . . 3_766 ?
C12S C9S C16S C17S 63(4) 3_766 . . 3_766 ?
C1S C9S C16S C17S 32(4) 3_766 . . 3_766 ?
C9S C13S C16S C14S 112(30) . . . 3_766 ?
C2S C13S C16S C14S 49(30) . . . 3_766 ?
C14S C13S C16S C14S -48(34) . . . 3_766 ?
C8S C13S C16S C14S -113(31) . . . 3_766 ?
C16S C13S C16S C14S -33(25) 3_766 . . 3_766 ?
C4S C13S C16S C14S 37(31) . . . 3_766 ?
C6S C13S C16S C14S 159(30) . . . 3_766 ?
C15S C13S C16S C14S 126(30) . . . 3_766 ?
C3S C13S C16S C14S 19(30) . . . 3_766 ?
C8S C13S C16S C14S 7(26) 3_766 . . 3_766 ?
C10S C13S C16S C14S -140(31) 3_766 . . 3_766 ?
C9S C13S C16S C8S 105(10) . . . 3_766 ?
C2S C13S C16S C8S 41(9) . . . 3_766 ?
C14S C13S C16S C8S -56(11) . . . 3_766 ?
C8S C13S C16S C8S -121(7) . . . 3_766 ?
C16S C13S C16S C8S -40(6) 3_766 . . 3_766 ?
C4S C13S C16S C8S 30(10) . . . 3_766 ?
C6S C13S C16S C8S 152(8) . . . 3_766 ?
C15S C13S C16S C8S 119(8) . . . 3_766 ?
C3S C13S C16S C8S 12(8) . . . 3_766 ?
C10S C13S C16S C8S -148(9) 3_766 . . 3_766 ?
C9S C13S C16S C13S 145(12) . . . 3_766 ?
C2S C13S C16S C13S 81(9) . . . 3_766 ?
C14S C13S C16S C13S -16(12) . . . 3_766 ?
C8S C13S C16S C13S -80(10) . . . 3_766 ?
C16S C13S C16S C13S 0.002(15) 3_766 . . 3_766 ?
C4S C13S C16S C13S 70(10) . . . 3_766 ?
C6S C13S C16S C13S -168(10) . . . 3_766 ?
C15S C13S C16S C13S 159(10) . . . 3_766 ?
C3S C13S C16S C13S 52(8) . . . 3_766 ?
C8S C13S C16S C13S 40(6) 3_766 . . 3_766 ?
C10S C13S C16S C13S -107(10) 3_766 . . 3_766 ?
C9S C13S C16S C8S -134(12) . . . . ?
C2S C13S C16S C8S 162(11) . . . . ?
C14S C13S C16S C8S 65(11) . . . . ?
C16S C13S C16S C8S 80(10) 3_766 . . . ?
C4S C13S C16S C8S 151(11) . . . . ?
C6S C13S C16S C8S -87(9) . . . . ?
C15S C13S C16S C8S -120(9) . . . . ?
C3S C13S C16S C8S 132(9) . . . . ?
C8S C13S C16S C8S 121(7) 3_766 . . . ?
C10S C13S C16S C8S -27(9) 3_766 . . . ?
C9S C13S C16S C2S -175(11) . . . 3_766 ?
C2S C13S C16S C2S 121(7) . . . 3_766 ?
C14S C13S C16S C2S 24(13) . . . 3_766 ?
C8S C13S C16S C2S -41(9) . . . 3_766 ?
C16S C13S C16S C2S 40(6) 3_766 . . 3_766 ?
C4S C13S C16S C2S 110(7) . . . 3_766 ?
C6S C13S C16S C2S -128(8) . . . 3_766 ?
C15S C13S C16S C2S -161(9) . . . 3_766 ?
C3S C13S C16S C2S 92(7) . . . 3_766 ?
C8S C13S C16S C2S 80(9) 3_766 . . 3_766 ?
C10S C13S C16S C2S -68(7) 3_766 . . 3_766 ?
C2S C13S C16S C9S -64(8) . . . . ?
C14S C13S C16S C9S -161(13) . . . . ?
C8S C13S C16S C9S 134(12) . . . . ?
C16S C13S C16S C9S -145(12) 3_766 . . . ?
C4S C13S C16S C9S -75(9) . . . . ?
C6S C13S C16S C9S 47(7) . . . . ?
C15S C13S C16S C9S 14(7) . . . . ?
C3S C13S C16S C9S -93(8) . . . . ?
C8S C13S C16S C9S -105(10) 3_766 . . . ?
C10S C13S C16S C9S 108(9) 3_766 . . . ?
C9S C13S C16S C16S 145(12) . . . 3_766 ?
C2S C13S C16S C16S 81(9) . . . 3_766 ?
C14S C13S C16S C16S -16(12) . . . 3_766 ?
C8S C13S C16S C16S -80(10) . . . 3_766 ?
C4S C13S C16S C16S 70(10) . . . 3_766 ?
C6S C13S C16S C16S -168(10) . . . 3_766 ?
C15S C13S C16S C16S 159(10) . . . 3_766 ?
C3S C13S C16S C16S 52(8) . . . 3_766 ?
C8S C13S C16S C16S 40(6) 3_766 . . 3_766 ?
C10S C13S C16S C16S -107(10) 3_766 . . 3_766 ?
C9S C13S C16S C9S 158(8) . . . 3_766 ?
C2S C13S C16S C9S 94(6) . . . 3_766 ?
C14S C13S C16S C9S -3(11) . . . 3_766 ?
C8S C13S C16S C9S -68(9) . . . 3_766 ?
C16S C13S C16S C9S 13(5) 3_766 . . 3_766 ?
C4S C13S C16S C9S 83(7) . . . 3_766 ?
C6S C13S C16S C9S -155(6) . . . 3_766 ?
C15S C13S C16S C9S 172(7) . . . 3_766 ?
C3S C13S C16S C9S 65(5) . . . 3_766 ?
C8S C13S C16S C9S 53(6) 3_766 . . 3_766 ?
C10S C13S C16S C9S -94(7) 3_766 . . 3_766 ?
C9S C13S C16S C7S -69(11) . . . 3_766 ?
C2S C13S C16S C7S -133(9) . . . 3_766 ?
C14S C13S C16S C7S 130(12) . . . 3_766 ?
C8S C13S C16S C7S 65(12) . . . 3_766 ?
C16S C13S C16S C7S 145(15) 3_766 . . 3_766 ?
C4S C13S C16S C7S -144(9) . . . 3_766 ?
C6S C13S C16S C7S -22(8) . . . 3_766 ?
C15S C13S C16S C7S -55(9) . . . 3_766 ?
C3S C13S C16S C7S -163(8) . . . 3_766 ?
C8S C13S C16S C7S -174(14) 3_766 . . 3_766 ?
C10S C13S C16S C7S 38(8) 3_766 . . 3_766 ?
C9S C13S C16S C10S -108(9) . . . 3_766 ?
C2S C13S C16S C10S -171(7) . . . 3_766 ?
C14S C13S C16S C10S 92(10) . . . 3_766 ?
C8S C13S C16S C10S 27(9) . . . 3_766 ?
C16S C13S C16S C10S 107(10) 3_766 . . 3_766 ?
C4S C13S C16S C10S 177(7) . . . 3_766 ?
C6S C13S C16S C10S -61(5) . . . 3_766 ?
C15S C13S C16S C10S -94(6) . . . 3_766 ?
C3S C13S C16S C10S 159(6) . . . 3_766 ?
C8S C13S C16S C10S 148(9) 3_766 . . 3_766 ?
C9S C13S C16S C17S -26(10) . . . 3_766 ?
C2S C13S C16S C17S -89(10) . . . 3_766 ?
C14S C13S C16S C17S 174(9) . . . 3_766 ?
C8S C13S C16S C17S 109(12) . . . 3_766 ?
C16S C13S C16S C17S -171(14) 3_766 . . 3_766 ?
C4S C13S C16S C17S -101(10) . . . 3_766 ?
C6S C13S C16S C17S 21(7) . . . 3_766 ?
C15S C13S C16S C17S -12(7) . . . 3_766 ?
C3S C13S C16S C17S -119(8) . . . 3_766 ?
C8S C13S C16S C17S -131(12) 3_766 . . 3_766 ?
C10S C13S C16S C17S 82(8) 3_766 . . 3_766 ?
C5S C7S C17S C11S -4(32) . . . 3_766 ?
C18S C7S C17S C11S 3(13) 3_766 . . 3_766 ?
C3S C7S C17S C11S 171(36) . . . 3_766 ?
C12S C7S C17S C11S 44(14) . . . 3_766 ?
C1S C7S C17S C11S 27(8) . . . 3_766 ?
C10S C7S C17S C11S 65(19) . . . 3_766 ?
C16S C7S C17S C11S 109(11) 3_766 . . 3_766 ?
C14S C7S C17S C11S 150(10) . . . 3_766 ?
C4S C7S C17S C11S 170(9) . . . 3_766 ?
C6S C7S C17S C11S 49(9) 3_766 . . 3_766 ?
C5S C7S C17S C18S -7(25) . . . 3_766 ?
C3S C7S C17S C18S 168(43) . . . 3_766 ?
C12S C7S C17S C18S 41(10) . . . 3_766 ?
C1S C7S C17S C18S 24(8) . . . 3_766 ?
C11S C7S C17S C18S -3(13) 3_766 . . 3_766 ?
C10S C7S C17S C18S 61(14) . . . 3_766 ?
C16S C7S C17S C18S 106(11) 3_766 . . 3_766 ?
C14S C7S C17S C18S 147(11) . . . 3_766 ?
C4S C7S C17S C18S 166(15) . . . 3_766 ?
C6S C7S C17S C18S 46(8) 3_766 . . 3_766 ?
C5S C7S C17S C1S -31(27) . . . . ?
C18S C7S C17S C1S -24(8) 3_766 . . . ?
C3S C7S C17S C1S 144(40) . . . . ?
C12S C7S C17S C1S 17(9) . . . . ?
C11S C7S C17S C1S -27(8) 3_766 . . . ?
C10S C7S C17S C1S 38(14) . . . . ?
C16S C7S C17S C1S 83(7) 3_766 . . . ?
C14S C7S C17S C1S 123(6) . . . . ?
C4S C7S C17S C1S 143(10) . . . . ?
C6S C7S C17S C1S 22(3) 3_766 . . . ?
C18S C7S C17S C5S 7(25) 3_766 . . . ?
C3S C7S C17S C5S 175(64) . . . . ?
C12S C7S C17S C5S 49(25) . . . . ?
C1S C7S C17S C5S 31(27) . . . . ?
C11S C7S C17S C5S 4(32) 3_766 . . . ?
C10S C7S C17S C5S 69(26) . . . . ?
C16S C7S C17S C5S 114(30) 3_766 . . . ?
C14S C7S C17S C5S 154(30) . . . . ?
C4S C7S C17S C5S 174(36) . . . . ?
C6S C7S C17S C5S 54(27) 3_766 . . . ?
C5S C7S C17S C14S -154(30) . . . . ?
C18S C7S C17S C14S -147(11) 3_766 . . . ?
C3S C7S C17S C14S 21(37) . . . . ?
C12S C7S C17S C14S -106(11) . . . . ?
C1S C7S C17S C14S -123(6) . . . . ?
C11S C7S C17S C14S -150(10) 3_766 . . . ?
C10S C7S C17S C14S -85(15) . . . . ?
C16S C7S C17S C14S -40(5) 3_766 . . . ?
C4S C7S C17S C14S 20(8) . . . . ?
C6S C7S C17S C14S -101(5) 3_766 . . . ?
C5S C7S C17S C16S -114(30) . . . 3_766 ?
C18S C7S C17S C16S -106(11) 3_766 . . 3_766 ?
C3S C7S C17S C16S 61(38) . . . 3_766 ?
C12S C7S C17S C16S -65(10) . . . 3_766 ?
C1S C7S C17S C16S -83(7) . . . 3_766 ?
C11S C7S C17S C16S -109(11) 3_766 . . 3_766 ?
C10S C7S C17S C16S -45(14) . . . 3_766 ?
C14S C7S C17S C16S 40(5) . . . 3_766 ?
C4S C7S C17S C16S 60(9) . . . 3_766 ?
C6S C7S C17S C16S -60(6) 3_766 . . 3_766 ?
C5S C7S C17S C15S -67(29) . . . 3_766 ?
C18S C7S C17S C15S -60(10) 3_766 . . 3_766 ?
C3S C7S C17S C15S 108(38) . . . 3_766 ?
C12S C7S C17S C15S -19(12) . . . 3_766 ?
C1S C7S C17S C15S -36(5) . . . 3_766 ?
C11S C7S C17S C15S -63(8) 3_766 . . 3_766 ?
C10S C7S C17S C15S 2(17) . . . 3_766 ?
C16S C7S C17S C15S 47(7) 3_766 . . 3_766 ?
C14S C7S C17S C15S 87(6) . . . 3_766 ?
C4S C7S C17S C15S 107(9) . . . 3_766 ?
C6S C7S C17S C15S -14(5) 3_766 . . 3_766 ?
C5S C7S C17S C6S -54(27) . . . 3_766 ?
C18S C7S C17S C6S -46(8) 3_766 . . 3_766 ?
C3S C7S C17S C6S 122(39) . . . 3_766 ?
C12S C7S C17S C6S -5(9) . . . 3_766 ?
C1S C7S C17S C6S -22(3) . . . 3_766 ?
C11S C7S C17S C6S -49(9) 3_766 . . 3_766 ?
C10S C7S C17S C6S 15(14) . . . 3_766 ?
C16S C7S C17S C6S 60(6) 3_766 . . 3_766 ?
C14S C7S C17S C6S 101(5) . . . 3_766 ?
C4S C7S C17S C6S 120(10) . . . 3_766 ?
C5S C7S C17S C12S -49(25) . . . . ?
C18S C7S C17S C12S -41(10) 3_766 . . . ?
C3S C7S C17S C12S 127(44) . . . . ?
C1S C7S C17S C12S -17(10) . . . . ?
C11S C7S C17S C12S -44(14) 3_766 . . . ?
C10S C7S C17S C12S 20(10) . . . . ?
C16S C7S C17S C12S 65(10) 3_766 . . . ?
C14S C7S C17S C12S 106(11) . . . . ?
C4S C7S C17S C12S 125(16) . . . . ?
C6S C7S C17S C12S 5(9) 3_766 . . . ?
C5S C7S C17S C3S -175(64) . . . . ?
C18S C7S C17S C3S -168(43) 3_766 . . . ?
C12S C7S C17S C3S -127(44) . . . . ?
C1S C7S C17S C3S -144(40) . . . . ?
C11S C7S C17S C3S -171(36) 3_766 . . . ?
C10S C7S C17S C3S -106(45) . . . . ?
C16S C7S C17S C3S -61(38) 3_766 . . . ?
C14S C7S C17S C3S -21(37) . . . . ?
C4S C7S C17S C3S -1(31) . . . . ?
C6S C7S C17S C3S -122(39) 3_766 . . . ?
C5S C7S C17S C4S -174(36) . . . . ?
C18S C7S C17S C4S -166(15) 3_766 . . . ?
C3S C7S C17S C4S 1(31) . . . . ?
C12S C7S C17S C4S -125(16) . . . . ?
C1S C7S C17S C4S -143(10) . . . . ?
C11S C7S C17S C4S -170(9) 3_766 . . . ?
C10S C7S C17S C4S -105(19) . . . . ?
C16S C7S C17S C4S -60(9) 3_766 . . . ?
C14S C7S C17S C4S -20(8) . . . . ?
C6S C7S C17S C4S -120(10) 3_766 . . . ?
C18S C1S C17S C11S -99(14) 3_766 . . 3_766 ?
C6S C1S C17S C11S 139(16) 3_766 . . 3_766 ?
C12S C1S C17S C11S -150(15) . . . 3_766 ?
C15S C1S C17S C11S 109(13) 3_766 . . 3_766 ?
C7S C1S C17S C11S -131(15) . . . 3_766 ?
C5S C1S C17S C11S -122(13) . . . 3_766 ?
C10S C1S C17S C11S -152(13) . . . 3_766 ?
C9S C1S C17S C11S 139(13) 3_766 . . 3_766 ?
C16S C1S C17S C11S 165(14) 3_766 . . 3_766 ?
C3S C1S C17S C11S -138(13) . . . 3_766 ?
C18S C1S C17S C7S 32(11) 3_766 . . . ?
C6S C1S C17S C7S -89(12) 3_766 . . . ?
C12S C1S C17S C7S -19(10) . . . . ?
C11S C1S C17S C7S 131(15) 3_766 . . . ?
C15S C1S C17S C7S -120(10) 3_766 . . . ?
C5S C1S C17S C7S 9(8) . . . . ?
C10S C1S C17S C7S -21(10) . . . . ?
C9S C1S C17S C7S -90(9) 3_766 . . . ?
C16S C1S C17S C7S -63(8) 3_766 . . . ?
C3S C1S C17S C7S -7(8) . . . . ?
C6S C1S C17S C18S -122(13) 3_766 . . 3_766 ?
C12S C1S C17S C18S -51(10) . . . 3_766 ?
C11S C1S C17S C18S 99(14) 3_766 . . 3_766 ?
C15S C1S C17S C18S -152(11) 3_766 . . 3_766 ?
C7S C1S C17S C18S -32(11) . . . 3_766 ?
C5S C1S C17S C18S -23(9) . . . 3_766 ?
C10S C1S C17S C18S -53(10) . . . 3_766 ?
C9S C1S C17S C18S -122(10) 3_766 . . 3_766 ?
C16S C1S C17S C18S -96(10) 3_766 . . 3_766 ?
C3S C1S C17S C18S -39(10) . . . 3_766 ?
C18S C1S C17S C5S 23(9) 3_766 . . . ?
C6S C1S C17S C5S -98(9) 3_766 . . . ?
C12S C1S C17S C5S -28(6) . . . . ?
C11S C1S C17S C5S 122(13) 3_766 . . . ?
C15S C1S C17S C5S -129(6) 3_766 . . . ?
C7S C1S C17S C5S -9(8) . . . . ?
C10S C1S C17S C5S -30(5) . . . . ?
C9S C1S C17S C5S -99(4) 3_766 . . . ?
C16S C1S C17S C5S -72(4) 3_766 . . . ?
C3S C1S C17S C5S -16(4) . . . . ?
C18S C1S C17S C14S 85(11) 3_766 . . . ?
C6S C1S C17S C14S -36(11) 3_766 . . . ?
C12S C1S C17S C14S 34(9) . . . . ?
C11S C1S C17S C14S -176(15) 3_766 . . . ?
C15S C1S C17S C14S -67(8) 3_766 . . . ?
C7S C1S C17S C14S 53(8) . . . . ?
C5S C1S C17S C14S 62(6) . . . . ?
C10S C1S C17S C14S 32(8) . . . . ?
C9S C1S C17S C14S -37(6) 3_766 . . . ?
C16S C1S C17S C14S -11(5) 3_766 . . . ?
C3S C1S C17S C14S 46(6) . . . . ?
C18S C1S C17S C16S 96(10) 3_766 . . 3_766 ?
C6S C1S C17S C16S -26(9) 3_766 . . 3_766 ?
C12S C1S C17S C16S 44(6) . . . 3_766 ?
C11S C1S C17S C16S -165(14) 3_766 . . 3_766 ?
C15S C1S C17S C16S -57(6) 3_766 . . 3_766 ?
C7S C1S C17S C16S 63(8) . . . 3_766 ?
C5S C1S C17S C16S 72(4) . . . 3_766 ?
C10S C1S C17S C16S 42(5) . . . 3_766 ?
C9S C1S C17S C16S -26(4) 3_766 . . 3_766 ?
C3S C1S C17S C16S 56(4) . . . 3_766 ?
C18S C1S C17S C15S 152(11) 3_766 . . 3_766 ?
C6S C1S C17S C15S 31(8) 3_766 . . 3_766 ?
C12S C1S C17S C15S 101(8) . . . 3_766 ?
C11S C1S C17S C15S -109(13) 3_766 . . 3_766 ?
C7S C1S C17S C15S 120(10) . . . 3_766 ?
C5S C1S C17S C15S 129(6) . . . 3_766 ?
C10S C1S C17S C15S 99(7) . . . 3_766 ?
C9S C1S C17S C15S 30(4) 3_766 . . 3_766 ?
C16S C1S C17S C15S 57(6) 3_766 . . 3_766 ?
C3S C1S C17S C15S 113(6) . . . 3_766 ?
C18S C1S C17S C6S 122(13) 3_766 . . 3_766 ?
C12S C1S C17S C6S 70(8) . . . 3_766 ?
C11S C1S C17S C6S -139(16) 3_766 . . 3_766 ?
C15S C1S C17S C6S -31(8) 3_766 . . 3_766 ?
C7S C1S C17S C6S 89(12) . . . 3_766 ?
C5S C1S C17S C6S 98(9) . . . 3_766 ?
C10S C1S C17S C6S 68(8) . . . 3_766 ?
C9S C1S C17S C6S -1(7) 3_766 . . 3_766 ?
C16S C1S C17S C6S 26(9) 3_766 . . 3_766 ?
C3S C1S C17S C6S 82(9) . . . 3_766 ?
C18S C1S C17S C12S 51(10) 3_766 . . . ?
C6S C1S C17S C12S -70(8) 3_766 . . . ?
C11S C1S C17S C12S 150(15) 3_766 . . . ?
C15S C1S C17S C12S -101(8) 3_766 . . . ?
C7S C1S C17S C12S 19(10) . . . . ?
C5S C1S C17S C12S 28(6) . . . . ?
C10S C1S C17S C12S -2(6) . . . . ?
C9S C1S C17S C12S -71(6) 3_766 . . . ?
C16S C1S C17S C12S -44(6) 3_766 . . . ?
C3S C1S C17S C12S 12(7) . . . . ?
C18S C1S C17S C3S 39(10) 3_766 . . . ?
C6S C1S C17S C3S -82(9) 3_766 . . . ?
C12S C1S C17S C3S -12(7) . . . . ?
C11S C1S C17S C3S 138(13) 3_766 . . . ?
C15S C1S C17S C3S -113(6) 3_766 . . . ?
C7S C1S C17S C3S 7(8) . . . . ?
C5S C1S C17S C3S 16(4) . . . . ?
C10S C1S C17S C3S -14(6) . . . . ?
C9S C1S C17S C3S -83(5) 3_766 . . . ?
C16S C1S C17S C3S -56(4) 3_766 . . . ?
C18S C1S C17S C4S 55(9) 3_766 . . . ?
C6S C1S C17S C4S -67(10) 3_766 . . . ?
C12S C1S C17S C4S 3(8) . . . . ?
C11S C1S C17S C4S 154(13) 3_766 . . . ?
C15S C1S C17S C4S -98(6) 3_766 . . . ?
C7S C1S C17S C4S 23(7) . . . . ?
C5S C1S C17S C4S 32(4) . . . . ?
C10S C1S C17S C4S 2(6) . . . . ?
C9S C1S C17S C4S -67(4) 3_766 . . . ?
C16S C1S C17S C4S -41(4) 3_766 . . . ?
C3S C1S C17S C4S 16(4) . . . . ?
C7S C5S C17S C11S 176(33) . . . 3_766 ?
C18S C5S C17S C11S 6(13) 3_766 . . 3_766 ?
C3S C5S C17S C11S 173(11) . . . 3_766 ?
C12S C5S C17S C11S 63(12) . . . 3_766 ?
C10S C5S C17S C11S 96(12) . . . 3_766 ?
C1S C5S C17S C11S 31(7) . . . 3_766 ?
C4S C5S C17S C11S 171(9) . . . 3_766 ?
C6S C5S C17S C11S 55(8) 3_766 . . 3_766 ?
C16S C5S C17S C11S 116(10) 3_766 . . 3_766 ?
C2S C5S C17S C11S 150(9) . . . 3_766 ?
C18S C5S C17S C7S -169(35) 3_766 . . . ?
C3S C5S C17S C7S -2(29) . . . . ?
C12S C5S C17S C7S -112(32) . . . . ?
C10S C5S C17S C7S -80(29) . . . . ?
C1S C5S C17S C7S -145(31) . . . . ?
C11S C5S C17S C7S -176(33) 3_766 . . . ?
C4S C5S C17S C7S -5(28) . . . . ?
C6S C5S C17S C7S -121(30) 3_766 . . . ?
C16S C5S C17S C7S -59(29) 3_766 . . . ?
C2S C5S C17S C7S -26(28) . . . . ?
C7S C5S C17S C18S 169(35) . . . 3_766 ?
C3S C5S C17S C18S 167(15) . . . 3_766 ?
C12S C5S C17S C18S 57(13) . . . 3_766 ?
C10S C5S C17S C18S 90(15) . . . 3_766 ?
C1S C5S C17S C18S 25(11) . . . 3_766 ?
C11S C5S C17S C18S -6(13) 3_766 . . 3_766 ?
C4S C5S C17S C18S 165(13) . . . 3_766 ?
C6S C5S C17S C18S 49(11) 3_766 . . 3_766 ?
C16S C5S C17S C18S 110(13) 3_766 . . 3_766 ?
C2S C5S C17S C18S 144(13) . . . 3_766 ?
C7S C5S C17S C1S 145(31) . . . . ?
C18S C5S C17S C1S -25(11) 3_766 . . . ?
C3S C5S C17S C1S 142(9) . . . . ?
C12S C5S C17S C1S 32(10) . . . . ?
C10S C5S C17S C1S 65(9) . . . . ?
C11S C5S C17S C1S -31(7) 3_766 . . . ?
C4S C5S C17S C1S 140(5) . . . . ?
C6S C5S C17S C1S 24(4) 3_766 . . . ?
C16S C5S C17S C1S 85(6) 3_766 . . . ?
C2S C5S C17S C1S 119(5) . . . . ?
C7S C5S C17S C14S 24(28) . . . . ?
C18S C5S C17S C14S -145(14) 3_766 . . . ?
C3S C5S C17S C14S 22(9) . . . . ?
C12S C5S C17S C14S -88(11) . . . . ?
C10S C5S C17S C14S -56(9) . . . . ?
C1S C5S C17S C14S -121(6) . . . . ?
C11S C5S C17S C14S -152(11) 3_766 . . . ?
C4S C5S C17S C14S 19(4) . . . . ?
C6S C5S C17S C14S -97(5) 3_766 . . . ?
C16S C5S C17S C14S -36(4) 3_766 . . . ?
C2S C5S C17S C14S -2(4) . . . . ?
C7S C5S C17S C16S 59(29) . . . 3_766 ?
C18S C5S C17S C16S -110(13) 3_766 . . 3_766 ?
C3S C5S C17S C16S 57(9) . . . 3_766 ?
C12S C5S C17S C16S -53(10) . . . 3_766 ?
C10S C5S C17S C16S -20(9) . . . 3_766 ?
C1S C5S C17S C16S -85(6) . . . 3_766 ?
C11S C5S C17S C16S -116(10) 3_766 . . 3_766 ?
C4S C5S C17S C16S 55(4) . . . 3_766 ?
C6S C5S C17S C16S -61(4) 3_766 . . 3_766 ?
C2S C5S C17S C16S 34(4) . . . 3_766 ?
C7S C5S C17S C15S 113(30) . . . 3_766 ?
C18S C5S C17S C15S -57(12) 3_766 . . 3_766 ?
C3S C5S C17S C15S 111(9) . . . 3_766 ?
C12S C5S C17S C15S 1(10) . . . 3_766 ?
C10S C5S C17S C15S 33(9) . . . 3_766 ?
C1S C5S C17S C15S -32(4) . . . 3_766 ?
C11S C5S C17S C15S -63(7) 3_766 . . 3_766 ?
C4S C5S C17S C15S 108(4) . . . 3_766 ?
C6S C5S C17S C15S -8(4) 3_766 . . 3_766 ?
C16S C5S C17S C15S 53(5) 3_766 . . 3_766 ?
C2S C5S C17S C15S 87(4) . . . 3_766 ?
C7S C5S C17S C6S 121(30) . . . 3_766 ?
C18S C5S C17S C6S -49(11) 3_766 . . 3_766 ?
C3S C5S C17S C6S 119(9) . . . 3_766 ?
C12S C5S C17S C6S 9(10) . . . 3_766 ?
C10S C5S C17S C6S 41(8) . . . 3_766 ?
C1S C5S C17S C6S -24(4) . . . 3_766 ?
C11S C5S C17S C6S -55(8) 3_766 . . 3_766 ?
C4S C5S C17S C6S 116(3) . . . 3_766 ?
C16S C5S C17S C6S 61(4) 3_766 . . 3_766 ?
C2S C5S C17S C6S 95(3) . . . 3_766 ?
C7S C5S C17S C12S 112(32) . . . . ?
C18S C5S C17S C12S -57(13) 3_766 . . . ?
C3S C5S C17S C12S 110(13) . . . . ?
C10S C5S C17S C12S 33(10) . . . . ?
C1S C5S C17S C12S -32(10) . . . . ?
C11S C5S C17S C12S -63(12) 3_766 . . . ?
C4S C5S C17S C12S 108(10) . . . . ?
C6S C5S C17S C12S -9(10) 3_766 . . . ?
C16S C5S C17S C12S 53(10) 3_766 . . . ?
C2S C5S C17S C12S 87(10) . . . . ?
C7S C5S C17S C3S 2(29) . . . . ?
C18S C5S C17S C3S -167(15) 3_766 . . . ?
C12S C5S C17S C3S -110(13) . . . . ?
C10S C5S C17S C3S -78(10) . . . . ?
C1S C5S C17S C3S -142(9) . . . . ?
C11S C5S C17S C3S -173(11) 3_766 . . . ?
C4S C5S C17S C3S -2(8) . . . . ?
C6S C5S C17S C3S -119(9) 3_766 . . . ?
C16S C5S C17S C3S -57(9) 3_766 . . . ?
C2S C5S C17S C3S -23(8) . . . . ?
C7S C5S C17S C4S 5(28) . . . . ?
C18S C5S C17S C4S -165(13) 3_766 . . . ?
C3S C5S C17S C4S 2(8) . . . . ?
C12S C5S C17S C4S -108(10) . . . . ?
C10S C5S C17S C4S -75(8) . . . . ?
C1S C5S C17S C4S -140(5) . . . . ?
C11S C5S C17S C4S -171(9) 3_766 . . . ?
C6S C5S C17S C4S -116(3) 3_766 . . . ?
C16S C5S C17S C4S -55(4) 3_766 . . . ?
C2S C5S C17S C4S -21.0(13) . . . . ?
C13S C14S C17S C11S -10(38) . . . 3_766 ?
C16S C14S C17S C11S 13(20) 3_766 . . 3_766 ?
C2S C14S C17S C11S -49(22) . . . 3_766 ?
C4S C14S C17S C11S -84(19) . . . 3_766 ?
C8S C14S C17S C11S 57(21) . . . 3_766 ?
C9S C14S C17S C11S -13(27) . . . 3_766 ?
C7S C14S C17S C11S -59(17) . . . 3_766 ?
C3S C14S C17S C11S -64(18) . . . 3_766 ?
C5S C14S C17S C11S -52(17) . . . 3_766 ?
C16S C14S C17S C11S 19(21) . . . 3_766 ?
C8S C14S C17S C11S -1(19) 3_766 . . 3_766 ?
C13S C14S C17S C7S 49(28) . . . . ?
C16S C14S C17S C7S 72(10) 3_766 . . . ?
C2S C14S C17S C7S 10(11) . . . . ?
C4S C14S C17S C7S -25(9) . . . . ?
C8S C14S C17S C7S 116(11) . . . . ?
C9S C14S C17S C7S 46(15) . . . . ?
C3S C14S C17S C7S -5(9) . . . . ?
C5S C14S C17S C7S 6(8) . . . . ?
C16S C14S C17S C7S 77(10) . . . . ?
C8S C14S C17S C7S 58(9) 3_766 . . . ?
C13S C14S C17S C18S 26(29) . . . 3_766 ?
C16S C14S C17S C18S 49(10) 3_766 . . 3_766 ?
C2S C14S C17S C18S -13(12) . . . 3_766 ?
C4S C14S C17S C18S -48(10) . . . 3_766 ?
C8S C14S C17S C18S 93(11) . . . 3_766 ?
C9S C14S C17S C18S 23(17) . . . 3_766 ?
C7S C14S C17S C18S -23(7) . . . 3_766 ?
C3S C14S C17S C18S -28(8) . . . 3_766 ?
C5S C14S C17S C18S -16(7) . . . 3_766 ?
C16S C14S C17S C18S 54(10) . . . 3_766 ?
C8S C14S C17S C18S 35(9) 3_766 . . 3_766 ?
C13S C14S C17S C1S -6(29) . . . . ?
C16S C14S C17S C1S 17(9) 3_766 . . . ?
C2S C14S C17S C1S -44(11) . . . . ?
C4S C14S C17S C1S -80(8) . . . . ?
C8S C14S C17S C1S 61(10) . . . . ?
C9S C14S C17S C1S -9(16) . . . . ?
C7S C14S C17S C1S -55(7) . . . . ?
C3S C14S C17S C1S -60(7) . . . . ?
C5S C14S C17S C1S -48(5) . . . . ?
C16S C14S C17S C1S 23(9) . . . . ?
C8S C14S C17S C1S 3(7) 3_766 . . . ?
C13S C14S C17S C5S 43(27) . . . . ?
C16S C14S C17S C5S 65(7) 3_766 . . . ?
C2S C14S C17S C5S 4(8) . . . . ?
C4S C14S C17S C5S -31(6) . . . . ?
C8S C14S C17S C5S 109(8) . . . . ?
C9S C14S C17S C5S 40(13) . . . . ?
C7S C14S C17S C5S -6(8) . . . . ?
C3S C14S C17S C5S -12(5) . . . . ?
C16S C14S C17S C5S 71(6) . . . . ?
C8S C14S C17S C5S 52(5) 3_766 . . . ?
C13S C14S C17S C16S -23(23) . . . 3_766 ?
C2S C14S C17S C16S -62(7) . . . 3_766 ?
C4S C14S C17S C16S -97(8) . . . 3_766 ?
C8S C14S C17S C16S 44(8) . . . 3_766 ?
C9S C14S C17S C16S -26(10) . . . 3_766 ?
C7S C14S C17S C16S -72(10) . . . 3_766 ?
C3S C14S C17S C16S -77(7) . . . 3_766 ?
C5S C14S C17S C16S -65(7) . . . 3_766 ?
C16S C14S C17S C16S 5(7) . . . 3_766 ?
C8S C14S C17S C16S -14(6) 3_766 . . 3_766 ?
C13S C14S C17S C15S -44(27) . . . 3_766 ?
C16S C14S C17S C15S -21(7) 3_766 . . 3_766 ?
C2S C14S C17S C15S -83(8) . . . 3_766 ?
C4S C14S C17S C15S -118(5) . . . 3_766 ?
C8S C14S C17S C15S 22(8) . . . 3_766 ?
C9S C14S C17S C15S -47(13) . . . 3_766 ?
C7S C14S C17S C15S -93(8) . . . 3_766 ?
C3S C14S C17S C15S -98(5) . . . 3_766 ?
C5S C14S C17S C15S -87(4) . . . 3_766 ?
C16S C14S C17S C15S -16(6) . . . 3_766 ?
C8S C14S C17S C15S -35(4) 3_766 . . 3_766 ?
C13S C14S C17S C6S -18(27) . . . 3_766 ?
C16S C14S C17S C6S 5(7) 3_766 . . 3_766 ?
C2S C14S C17S C6S -57(8) . . . 3_766 ?
C4S C14S C17S C6S -92(5) . . . 3_766 ?
C8S C14S C17S C6S 49(8) . . . 3_766 ?
C9S C14S C17S C6S -21(13) . . . 3_766 ?
C7S C14S C17S C6S -67(7) . . . 3_766 ?
C3S C14S C17S C6S -72(5) . . . 3_766 ?
C5S C14S C17S C6S -60(4) . . . 3_766 ?
C16S C14S C17S C6S 11(6) . . . 3_766 ?
C8S C14S C17S C6S -9(4) 3_766 . . 3_766 ?
C13S C14S C17S C12S 13(26) . . . . ?
C16S C14S C17S C12S 36(7) 3_766 . . . ?
C2S C14S C17S C12S -26(8) . . . . ?
C4S C14S C17S C12S -61(6) . . . . ?
C8S C14S C17S C12S 79(8) . . . . ?
C9S C14S C17S C12S 10(13) . . . . ?
C7S C14S C17S C12S -36(8) . . . . ?
C3S C14S C17S C12S -41(5) . . . . ?
C5S C14S C17S C12S -30(3) . . . . ?
C16S C14S C17S C12S 41(6) . . . . ?
C8S C14S C17S C12S 22(5) 3_766 . . . ?
C13S C14S C17S C3S 54(26) . . . . ?
C16S C14S C17S C3S 77(7) 3_766 . . . ?
C2S C14S C17S C3S 15(7) . . . . ?
C4S C14S C17S C3S -20(5) . . . . ?
C8S C14S C17S C3S 121(9) . . . . ?
C9S C14S C17S C3S 51(12) . . . . ?
C7S C14S C17S C3S 5(9) . . . . ?
C5S C14S C17S C3S 12(5) . . . . ?
C16S C14S C17S C3S 82(6) . . . . ?
C8S C14S C17S C3S 63(5) 3_766 . . . ?
C13S C14S C17S C4S 74(26) . . . . ?
C16S C14S C17S C4S 97(8) 3_766 . . . ?
C2S C14S C17S C4S 35(5) . . . . ?
C8S C14S C17S C4S 140(10) . . . . ?
C9S C14S C17S C4S 71(11) . . . . ?
C7S C14S C17S C4S 25(9) . . . . ?
C3S C14S C17S C4S 20(5) . . . . ?
C5S C14S C17S C4S 31(6) . . . . ?
C16S C14S C17S C4S 102(6) . . . . ?
C8S C14S C17S C4S 83(5) 3_766 . . . ?
C1S C12S C17S C11S 19(9) . . . 3_766 ?
C10S C12S C17S C11S -167(15) . . . 3_766 ?
C18S C12S C17S C11S -44(15) 3_766 . . 3_766 ?
C6S C12S C17S C11S 57(11) 3_766 . . 3_766 ?
C5S C12S C17S C11S -108(13) . . . 3_766 ?
C7S C12S C17S C11S -131(16) . . . 3_766 ?
C8S C12S C17S C11S 132(11) 3_766 . . 3_766 ?
C15S C12S C17S C11S 71(9) 3_766 . . 3_766 ?
C3S C12S C17S C11S -145(11) . . . 3_766 ?
C16S C12S C17S C11S 140(11) 3_766 . . 3_766 ?
C1S C12S C17S C7S 150(16) . . . . ?
C10S C12S C17S C7S -36(17) . . . . ?
C18S C12S C17S C7S 87(16) 3_766 . . . ?
C6S C12S C17S C7S -171(16) 3_766 . . . ?
C5S C12S C17S C7S 23(13) . . . . ?
C11S C12S C17S C7S 131(16) 3_766 . . . ?
C8S C12S C17S C7S -97(15) 3_766 . . . ?
C15S C12S C17S C7S -158(14) 3_766 . . . ?
C3S C12S C17S C7S -13(12) . . . . ?
C16S C12S C17S C7S -89(13) 3_766 . . . ?
C1S C12S C17S C18S 63(14) . . . 3_766 ?
C10S C12S C17S C18S -123(18) . . . 3_766 ?
C6S C12S C17S C18S 101(18) 3_766 . . 3_766 ?
C5S C12S C17S C18S -64(11) . . . 3_766 ?
C7S C12S C17S C18S -87(16) . . . 3_766 ?
C11S C12S C17S C18S 44(15) 3_766 . . 3_766 ?
C8S C12S C17S C18S 176(19) 3_766 . . 3_766 ?
C15S C12S C17S C18S 115(16) 3_766 . . 3_766 ?
C3S C12S C17S C18S -101(14) . . . 3_766 ?
C16S C12S C17S C18S -176(17) 3_766 . . 3_766 ?
C10S C12S C17S C1S 174(16) . . . . ?
C18S C12S C17S C1S -63(14) 3_766 . . . ?
C6S C12S C17S C1S 39(8) 3_766 . . . ?
C5S C12S C17S C1S -127(13) . . . . ?
C7S C12S C17S C1S -150(16) . . . . ?
C11S C12S C17S C1S -19(9) 3_766 . . . ?
C8S C12S C17S C1S 113(10) 3_766 . . . ?
C15S C12S C17S C1S 52(7) 3_766 . . . ?
C3S C12S C17S C1S -163(10) . . . . ?
C16S C12S C17S C1S 121(9) 3_766 . . . ?
C1S C12S C17S C5S 127(13) . . . . ?
C10S C12S C17S C5S -58(14) . . . . ?
C18S C12S C17S C5S 64(11) 3_766 . . . ?
C6S C12S C17S C5S 166(15) 3_766 . . . ?
C7S C12S C17S C5S -23(13) . . . . ?
C11S C12S C17S C5S 108(13) 3_766 . . . ?
C8S C12S C17S C5S -120(15) 3_766 . . . ?
C15S C12S C17S C5S 179(12) 3_766 . . . ?
C3S C12S C17S C5S -36(8) . . . . ?
C16S C12S C17S C5S -111(12) 3_766 . . . ?
C1S C12S C17S C14S -147(9) . . . . ?
C10S C12S C17S C14S 27(14) . . . . ?
C18S C12S C17S C14S 150(16) 3_766 . . . ?
C6S C12S C17S C14S -108(8) 3_766 . . . ?
C5S C12S C17S C14S 86(10) . . . . ?
C7S C12S C17S C14S 63(12) . . . . ?
C11S C12S C17S C14S -166(11) 3_766 . . . ?
C8S C12S C17S C14S -34(8) 3_766 . . . ?
C15S C12S C17S C14S -95(6) 3_766 . . . ?
C3S C12S C17S C14S 50(7) . . . . ?
C16S C12S C17S C14S -26(4) 3_766 . . . ?
C1S C12S C17S C16S -121(9) . . . 3_766 ?
C10S C12S C17S C16S 53(14) . . . 3_766 ?
C18S C12S C17S C16S 176(17) 3_766 . . 3_766 ?
C6S C12S C17S C16S -83(7) 3_766 . . 3_766 ?
C5S C12S C17S C16S 111(12) . . . 3_766 ?
C7S C12S C17S C16S 89(13) . . . 3_766 ?
C11S C12S C17S C16S -140(11) 3_766 . . 3_766 ?
C8S C12S C17S C16S -8(6) 3_766 . . 3_766 ?
C15S C12S C17S C16S -69(5) 3_766 . . 3_766 ?
C3S C12S C17S C16S 75(8) . . . 3_766 ?
C1S C12S C17S C15S -52(7) . . . 3_766 ?
C10S C12S C17S C15S 122(15) . . . 3_766 ?
C18S C12S C17S C15S -115(16) 3_766 . . 3_766 ?
C6S C12S C17S C15S -13(6) 3_766 . . 3_766 ?
C5S C12S C17S C15S -179(12) . . . 3_766 ?
C7S C12S C17S C15S 158(14) . . . 3_766 ?
C11S C12S C17S C15S -71(9) 3_766 . . 3_766 ?
C8S C12S C17S C15S 61(7) 3_766 . . 3_766 ?
C3S C12S C17S C15S 145(8) . . . 3_766 ?
C16S C12S C17S C15S 69(5) 3_766 . . 3_766 ?
C1S C12S C17S C6S -39(8) . . . 3_766 ?
C10S C12S C17S C6S 136(17) . . . 3_766 ?
C18S C12S C17S C6S -101(18) 3_766 . . 3_766 ?
C5S C12S C17S C6S -166(15) . . . 3_766 ?
C7S C12S C17S C6S 171(16) . . . 3_766 ?
C11S C12S C17S C6S -57(11) 3_766 . . 3_766 ?
C8S C12S C17S C6S 75(7) 3_766 . . 3_766 ?
C15S C12S C17S C6S 13(6) 3_766 . . 3_766 ?
C3S C12S C17S C6S 158(11) . . . 3_766 ?
C16S C12S C17S C6S 83(7) 3_766 . . 3_766 ?
C1S C12S C17S C3S 163(10) . . . . ?
C10S C12S C17S C3S -22(13) . . . . ?
C18S C12S C17S C3S 101(14) 3_766 . . . ?
C6S C12S C17S C3S -158(11) 3_766 . . . ?
C5S C12S C17S C3S 36(8) . . . . ?
C7S C12S C17S C3S 13(12) . . . . ?
C11S C12S C17S C3S 145(11) 3_766 . . . ?
C8S C12S C17S C3S -83(10) 3_766 . . . ?
C15S C12S C17S C3S -145(8) 3_766 . . . ?
C16S C12S C17S C3S -75(8) 3_766 . . . ?
C1S C12S C17S C4S -176(8) . . . . ?
C10S C12S C17S C4S -2(13) . . . . ?
C18S C12S C17S C4S 121(14) 3_766 . . . ?
C6S C12S C17S C4S -137(8) 3_766 . . . ?
C5S C12S C17S C4S 57(9) . . . . ?
C7S C12S C17S C4S 34(12) . . . . ?
C11S C12S C17S C4S 165(10) 3_766 . . . ?
C8S C12S C17S C4S -63(8) 3_766 . . . ?
C15S C12S C17S C4S -124(6) 3_766 . . . ?
C3S C12S C17S C4S 21(5) . . . . ?
C16S C12S C17S C4S -55(4) 3_766 . . . ?
C5S C3S C17S C11S -7(12) . . . 3_766 ?
C4S C3S C17S C11S 169(11) . . . 3_766 ?
C7S C3S C17S C11S -10(37) . . . 3_766 ?
C10S C3S C17S C11S 45(12) . . . 3_766 ?
C2S C3S C17S C11S 136(10) . . . 3_766 ?
C18S C3S C17S C11S 1(10) 3_766 . . 3_766 ?
C14S C3S C17S C11S 147(12) . . . 3_766 ?
C12S C3S C17S C11S 34(10) . . . 3_766 ?
C16S C3S C17S C11S 102(11) 3_766 . . 3_766 ?
C13S C3S C17S C11S 138(10) . . . 3_766 ?
C8S C3S C17S C11S 78(10) 3_766 . . 3_766 ?
C5S C3S C17S C7S 3(37) . . . . ?
C4S C3S C17S C7S 179(43) . . . . ?
C10S C3S C17S C7S 55(38) . . . . ?
C2S C3S C17S C7S 145(41) . . . . ?
C18S C3S C17S C7S 10(36) 3_766 . . . ?
C14S C3S C17S C7S 156(41) . . . . ?
C12S C3S C17S C7S 43(37) . . . . ?
C16S C3S C17S C7S 112(40) 3_766 . . . ?
C13S C3S C17S C7S 148(41) . . . . ?
C8S C3S C17S C7S 87(39) 3_766 . . . ?
C5S C3S C17S C18S -8(9) . . . 3_766 ?
C4S C3S C17S C18S 168(12) . . . 3_766 ?
C7S C3S C17S C18S -10(36) . . . 3_766 ?
C10S C3S C17S C18S 44(10) . . . 3_766 ?
C2S C3S C17S C18S 135(10) . . . 3_766 ?
C14S C3S C17S C18S 146(10) . . . 3_766 ?
C12S C3S C17S C18S 33(7) . . . 3_766 ?
C16S C3S C17S C18S 102(10) 3_766 . . 3_766 ?
C13S C3S C17S C18S 138(10) . . . 3_766 ?
C8S C3S C17S C18S 77(8) 3_766 . . 3_766 ?
C5S C3S C17S C1S -31(8) . . . . ?
C4S C3S C17S C1S 145(9) . . . . ?
C7S C3S C17S C1S -34(38) . . . . ?
C10S C3S C17S C1S 21(8) . . . . ?
C2S C3S C17S C1S 111(7) . . . . ?
C18S C3S C17S C1S -23(6) 3_766 . . . ?
C14S C3S C17S C1S 123(7) . . . . ?
C12S C3S C17S C1S 9(6) . . . . ?
C16S C3S C17S C1S 78(7) 3_766 . . . ?
C13S C3S C17S C1S 114(6) . . . . ?
C8S C3S C17S C1S 53(5) 3_766 . . . ?
C4S C3S C17S C5S 176(14) . . . . ?
C7S C3S C17S C5S -3(37) . . . . ?
C10S C3S C17S C5S 52(8) . . . . ?
C2S C3S C17S C5S 143(11) . . . . ?
C18S C3S C17S C5S 8(9) 3_766 . . . ?
C14S C3S C17S C5S 154(11) . . . . ?
C12S C3S C17S C5S 41(7) . . . . ?
C16S C3S C17S C5S 109(10) 3_766 . . . ?
C13S C3S C17S C5S 145(10) . . . . ?
C8S C3S C17S C5S 84(8) 3_766 . . . ?
C5S C3S C17S C14S -154(11) . . . . ?
C4S C3S C17S C14S 22(6) . . . . ?
C7S C3S C17S C14S -156(41) . . . . ?
C10S C3S C17S C14S -102(9) . . . . ?
C2S C3S C17S C14S -11(5) . . . . ?
C18S C3S C17S C14S -146(10) 3_766 . . . ?
C12S C3S C17S C14S -113(8) . . . . ?
C16S C3S C17S C14S -44(5) 3_766 . . . ?
C13S C3S C17S C14S -8(4) . . . . ?
C8S C3S C17S C14S -69(5) 3_766 . . . ?
C5S C3S C17S C16S -109(10) . . . 3_766 ?
C4S C3S C17S C16S 67(8) . . . 3_766 ?
C7S C3S C17S C16S -112(40) . . . 3_766 ?
C10S C3S C17S C16S -57(8) . . . 3_766 ?
C2S C3S C17S C16S 33(6) . . . 3_766 ?
C18S C3S C17S C16S -102(10) 3_766 . . 3_766 ?
C14S C3S C17S C16S 44(5) . . . 3_766 ?
C12S C3S C17S C16S -69(7) . . . 3_766 ?
C13S C3S C17S C16S 36(5) . . . 3_766 ?
C8S C3S C17S C16S -25(5) 3_766 . . 3_766 ?
C5S C3S C17S C15S -70(8) . . . 3_766 ?
C4S C3S C17S C15S 106(8) . . . 3_766 ?
C7S C3S C17S C15S -73(39) . . . 3_766 ?
C10S C3S C17S C15S -18(9) . . . 3_766 ?
C2S C3S C17S C15S 73(6) . . . 3_766 ?
C18S C3S C17S C15S -62(8) 3_766 . . 3_766 ?
C14S C3S C17S C15S 84(6) . . . 3_766 ?
C12S C3S C17S C15S -29(6) . . . 3_766 ?
C16S C3S C17S C15S 39(6) 3_766 . . 3_766 ?
C13S C3S C17S C15S 75(5) . . . 3_766 ?
C8S C3S C17S C15S 15(4) 3_766 . . 3_766 ?
C5S C3S C17S C6S -53(7) . . . 3_766 ?
C4S C3S C17S C6S 123(8) . . . 3_766 ?
C7S C3S C17S C6S -55(38) . . . 3_766 ?
C10S C3S C17S C6S -1(8) . . . 3_766 ?
C2S C3S C17S C6S 90(6) . . . 3_766 ?
C18S C3S C17S C6S -45(7) 3_766 . . 3_766 ?
C14S C3S C17S C6S 101(6) . . . 3_766 ?
C12S C3S C17S C6S -12(5) . . . 3_766 ?
C16S C3S C17S C6S 57(6) 3_766 . . 3_766 ?
C13S C3S C17S C6S 93(5) . . . 3_766 ?
C8S C3S C17S C6S 32(3) 3_766 . . 3_766 ?
C5S C3S C17S C12S -41(7) . . . . ?
C4S C3S C17S C12S 135(11) . . . . ?
C7S C3S C17S C12S -43(37) . . . . ?
C10S C3S C17S C12S 11(7) . . . . ?
C2S C3S C17S C12S 102(8) . . . . ?
C18S C3S C17S C12S -33(7) 3_766 . . . ?
C14S C3S C17S C12S 113(8) . . . . ?
C16S C3S C17S C12S 69(7) 3_766 . . . ?
C13S C3S C17S C12S 105(7) . . . . ?
C8S C3S C17S C12S 44(6) 3_766 . . . ?
C5S C3S C17S C4S -176(14) . . . . ?
C7S C3S C17S C4S -179(43) . . . . ?
C10S C3S C17S C4S -124(13) . . . . ?
C2S C3S C17S C4S -33(4) . . . . ?
C18S C3S C17S C4S -168(12) 3_766 . . . ?
C14S C3S C17S C4S -22(6) . . . . ?
C12S C3S C17S C4S -135(11) . . . . ?
C16S C3S C17S C4S -67(8) 3_766 . . . ?
C13S C3S C17S C4S -31(6) . . . . ?
C8S C3S C17S C4S -91(8) 3_766 . . . ?
C2S C4S C17S C11S 78(15) . . . 3_766 ?
C3S C4S C17S C11S -14(14) . . . 3_766 ?
C14S C4S C17S C11S 128(16) . . . 3_766 ?
C13S C4S C17S C11S 113(14) . . . 3_766 ?
C9S C4S C17S C11S 95(14) . . . 3_766 ?
C7S C4S C17S C11S -14(13) . . . 3_766 ?
C16S C4S C17S C11S 77(14) 3_766 . . 3_766 ?
C5S C4S C17S C11S -12(12) . . . 3_766 ?
C10S C4S C17S C11S 19(13) . . . 3_766 ?
C8S C4S C17S C11S 109(14) . . . 3_766 ?
C8S C4S C17S C11S 54(13) 3_766 . . 3_766 ?
C2S C4S C17S C7S 92(13) . . . . ?
C3S C4S C17S C7S 0(14) . . . . ?
C14S C4S C17S C7S 142(14) . . . . ?
C13S C4S C17S C7S 126(13) . . . . ?
C9S C4S C17S C7S 109(12) . . . . ?
C16S C4S C17S C7S 91(13) 3_766 . . . ?
C5S C4S C17S C7S 2(11) . . . . ?
C10S C4S C17S C7S 33(12) . . . . ?
C8S C4S C17S C7S 123(13) . . . . ?
C8S C4S C17S C7S 68(12) 3_766 . . . ?
C2S C4S C17S C18S 83(9) . . . 3_766 ?
C3S C4S C17S C18S -10(10) . . . 3_766 ?
C14S C4S C17S C18S 133(10) . . . 3_766 ?
C13S C4S C17S C18S 117(8) . . . 3_766 ?
C9S C4S C17S C18S 99(8) . . . 3_766 ?
C7S C4S C17S C18S -9(10) . . . 3_766 ?
C16S C4S C17S C18S 82(9) 3_766 . . 3_766 ?
C5S C4S C17S C18S -7(6) . . . 3_766 ?
C10S C4S C17S C18S 24(7) . . . 3_766 ?
C8S C4S C17S C18S 113(8) . . . 3_766 ?
C8S C4S C17S C18S 58(7) 3_766 . . 3_766 ?
C2S C4S C17S C1S 58(7) . . . . ?
C3S C4S C17S C1S -35(9) . . . . ?
C14S C4S C17S C1S 108(8) . . . . ?
C13S C4S C17S C1S 92(7) . . . . ?
C9S C4S C17S C1S 74(6) . . . . ?
C7S C4S C17S C1S -35(10) . . . . ?
C16S C4S C17S C1S 57(7) 3_766 . . . ?
C5S C4S C17S C1S -33(4) . . . . ?
C10S C4S C17S C1S -2(6) . . . . ?
C8S C4S C17S C1S 88(7) . . . . ?
C8S C4S C17S C1S 33(5) 3_766 . . . ?
C2S C4S C17S C5S 91(6) . . . . ?
C3S C4S C17S C5S -2(8) . . . . ?
C14S C4S C17S C5S 141(7) . . . . ?
C13S C4S C17S C5S 125(6) . . . . ?
C9S C4S C17S C5S 107(5) . . . . ?
C7S C4S C17S C5S -2(11) . . . . ?
C16S C4S C17S C5S 89(6) 3_766 . . . ?
C10S C4S C17S C5S 31(4) . . . . ?
C8S C4S C17S C5S 121(5) . . . . ?
C8S C4S C17S C5S 66(4) 3_766 . . . ?
C2S C4S C17S C14S -50(6) . . . . ?
C3S C4S C17S C14S -143(10) . . . . ?
C13S C4S C17S C14S -16(6) . . . . ?
C9S C4S C17S C14S -34(5) . . . . ?
C7S C4S C17S C14S -142(14) . . . . ?
C16S C4S C17S C14S -51(7) 3_766 . . . ?
C5S C4S C17S C14S -141(7) . . . . ?
C10S C4S C17S C14S -109(7) . . . . ?
C8S C4S C17S C14S -20(6) . . . . ?
C8S C4S C17S C14S -75(5) 3_766 . . . ?
C2S C4S C17S C16S 1(7) . . . 3_766 ?
C3S C4S C17S C16S -92(9) . . . 3_766 ?
C14S C4S C17S C16S 51(7) . . . 3_766 ?
C13S C4S C17S C16S 35(6) . . . 3_766 ?
C9S C4S C17S C16S 17(6) . . . 3_766 ?
C7S C4S C17S C16S -91(13) . . . 3_766 ?
C5S C4S C17S C16S -89(6) . . . 3_766 ?
C10S C4S C17S C16S -58(6) . . . 3_766 ?
C8S C4S C17S C16S 31(7) . . . 3_766 ?
C8S C4S C17S C16S -24(5) 3_766 . . 3_766 ?
C2S C4S C17S C15S 14(6) . . . 3_766 ?
C3S C4S C17S C15S -79(8) . . . 3_766 ?
C14S C4S C17S C15S 64(6) . . . 3_766 ?
C13S C4S C17S C15S 48(5) . . . 3_766 ?
C9S C4S C17S C15S 31(5) . . . 3_766 ?
C7S C4S C17S C15S -78(12) . . . 3_766 ?
C16S C4S C17S C15S 13(6) 3_766 . . 3_766 ?
C5S C4S C17S C15S -76(4) . . . 3_766 ?
C10S C4S C17S C15S -45(5) . . . 3_766 ?
C8S C4S C17S C15S 45(5) . . . 3_766 ?
C8S C4S C17S C15S -10(3) 3_766 . . 3_766 ?
C2S C4S C17S C6S 39(6) . . . 3_766 ?
C3S C4S C17S C6S -54(8) . . . 3_766 ?
C14S C4S C17S C6S 89(6) . . . 3_766 ?
C13S C4S C17S C6S 73(5) . . . 3_766 ?
C9S C4S C17S C6S 55(5) . . . 3_766 ?
C7S C4S C17S C6S -54(11) . . . 3_766 ?
C16S C4S C17S C6S 38(6) 3_766 . . 3_766 ?
C5S C4S C17S C6S -52(4) . . . 3_766 ?
C10S C4S C17S C6S -21(5) . . . 3_766 ?
C8S C4S C17S C6S 69(5) . . . 3_766 ?
C8S C4S C17S C6S 14(3) 3_766 . . 3_766 ?
C2S C4S C17S C12S 60(6) . . . . ?
C3S C4S C17S C12S -33(8) . . . . ?
C14S C4S C17S C12S 110(7) . . . . ?
C13S C4S C17S C12S 94(5) . . . . ?
C9S C4S C17S C12S 76(5) . . . . ?
C7S C4S C17S C12S -32(11) . . . . ?
C16S C4S C17S C12S 59(6) 3_766 . . . ?
C5S C4S C17S C12S -31(3) . . . . ?
C10S C4S C17S C12S 1(4) . . . . ?
C8S C4S C17S C12S 90(5) . . . . ?
C8S C4S C17S C12S 35(4) 3_766 . . . ?
C2S C4S C17S C3S 93(8) . . . . ?
C14S C4S C17S C3S 143(10) . . . . ?
C13S C4S C17S C3S 127(9) . . . . ?
C9S C4S C17S C3S 109(8) . . . . ?
C7S C4S C17S C3S 0(14) . . . . ?
C16S C4S C17S C3S 92(9) 3_766 . . . ?
C5S C4S C17S C3S 2(8) . . . . ?
C10S C4S C17S C3S 34(8) . . . . ?
C8S C4S C17S C3S 123(9) . . . . ?
C8S C4S C17S C3S 68(8) 3_766 . . . ?
C17S C11S C18S C1S 119(11) 3_766 . . 3_766 ?
C7S C11S C18S C1S 122(13) 3_766 . . 3_766 ?
C6S C11S C18S C1S 17(7) . . . 3_766 ?
C15S C11S C18S C1S 32(8) . . . 3_766 ?
C12S C11S C18S C1S 35(21) 3_766 . . 3_766 ?
C5S C11S C18S C1S 133(27) 3_766 . . 3_766 ?
C16S C11S C18S C1S 74(8) . . . 3_766 ?
C1S C11S C18S C7S -122(13) 3_766 . . 3_766 ?
C17S C11S C18S C7S -3(13) 3_766 . . 3_766 ?
C6S C11S C18S C7S -106(10) . . . 3_766 ?
C15S C11S C18S C7S -91(11) . . . 3_766 ?
C12S C11S C18S C7S -88(21) 3_766 . . 3_766 ?
C5S C11S C18S C7S 11(20) 3_766 . . 3_766 ?
C16S C11S C18S C7S -48(8) . . . 3_766 ?
C1S C11S C18S C5S -133(27) 3_766 . . 3_766 ?
C17S C11S C18S C5S -14(27) 3_766 . . 3_766 ?
C7S C11S C18S C5S -11(20) 3_766 . . 3_766 ?
C6S C11S C18S C5S -116(25) . . . 3_766 ?
C15S C11S C18S C5S -101(25) . . . 3_766 ?
C12S C11S C18S C5S -98(27) 3_766 . . 3_766 ?
C16S C11S C18S C5S -59(22) . . . 3_766 ?
C1S C11S C18S C12S -35(21) 3_766 . . 3_766 ?
C17S C11S C18S C12S 84(23) 3_766 . . 3_766 ?
C7S C11S C18S C12S 88(21) 3_766 . . 3_766 ?
C6S C11S C18S C12S -18(19) . . . 3_766 ?
C15S C11S C18S C12S -3(23) . . . 3_766 ?
C5S C11S C18S C12S 98(27) 3_766 . . 3_766 ?
C16S C11S C18S C12S 39(19) . . . 3_766 ?
C1S C11S C18S C17S -119(11) 3_766 . . 3_766 ?
C7S C11S C18S C17S 3(13) 3_766 . . 3_766 ?
C6S C11S C18S C17S -103(9) . . . 3_766 ?
C15S C11S C18S C17S -87(8) . . . 3_766 ?
C12S C11S C18S C17S -84(23) 3_766 . . 3_766 ?
C5S C11S C18S C17S 14(27) 3_766 . . 3_766 ?
C16S C11S C18S C17S -45(9) . . . 3_766 ?
C1S C11S C18S C6S -17(7) 3_766 . . . ?
C17S C11S C18S C6S 103(9) 3_766 . . . ?
C7S C11S C18S C6S 106(10) 3_766 . . . ?
C15S C11S C18S C6S 15(6) . . . . ?
C12S C11S C18S C6S 18(19) 3_766 . . . ?
C5S C11S C18S C6S 116(25) 3_766 . . . ?
C16S C11S C18S C6S 58(4) . . . . ?
C1S C11S C18S C10S -54(21) 3_766 . . 3_766 ?
C17S C11S C18S C10S 65(24) 3_766 . . 3_766 ?
C7S C11S C18S C10S 69(20) 3_766 . . 3_766 ?
C6S C11S C18S C10S -37(20) . . . 3_766 ?
C15S C11S C18S C10S -22(24) . . . 3_766 ?
C12S C11S C18S C10S -19(13) 3_766 . . 3_766 ?
C5S C11S C18S C10S 79(25) 3_766 . . 3_766 ?
C16S C11S C18S C10S 20(19) . . . 3_766 ?
C1S C11S C18S C3S -121(17) 3_766 . . 3_766 ?
C17S C11S C18S C3S -1(17) 3_766 . . 3_766 ?
C7S C11S C18S C3S 2(11) 3_766 . . 3_766 ?
C6S C11S C18S C3S -104(14) . . . 3_766 ?
C15S C11S C18S C3S -89(15) . . . 3_766 ?
C12S C11S C18S C3S -86(20) 3_766 . . 3_766 ?
C5S C11S C18S C3S 12(14) 3_766 . . 3_766 ?
C16S C11S C18S C3S -47(12) . . . 3_766 ?
C1S C11S C18S C15S -32(8) 3_766 . . . ?
C17S C11S C18S C15S 87(8) 3_766 . . . ?
C7S C11S C18S C15S 91(11) 3_766 . . . ?
C6S C11S C18S C15S -15(6) . . . . ?
C12S C11S C18S C15S 3(23) 3_766 . . . ?
C5S C11S C18S C15S 101(25) 3_766 . . . ?
C16S C11S C18S C15S 42(7) . . . . ?
C1S C11S C18S C16S -74(8) 3_766 . . . ?
C17S C11S C18S C16S 45(9) 3_766 . . . ?
C7S C11S C18S C16S 48(8) 3_766 . . . ?
C6S C11S C18S C16S -58(4) . . . . ?
C15S C11S C18S C16S -42(7) . . . . ?
C12S C11S C18S C16S -39(19) 3_766 . . . ?
C5S C11S C18S C16S 59(22) 3_766 . . . ?
C1S C11S C18S C14S -101(8) 3_766 . . 3_766 ?
C17S C11S C18S C14S 18(8) 3_766 . . 3_766 ?
C7S C11S C18S C14S 21(8) 3_766 . . 3_766 ?
C6S C11S C18S C14S -84(4) . . . 3_766 ?
C15S C11S C18S C14S -69(5) . . . 3_766 ?
C12S C11S C18S C14S -66(20) 3_766 . . 3_766 ?
C5S C11S C18S C14S 32(23) 3_766 . . 3_766 ?
C16S C11S C18S C14S -27(3) . . . 3_766 ?
C15S C6S C18S C1S -67(19) . . . 3_766 ?
C12S C6S C18S C1S 164(26) 3_766 . . 3_766 ?
C9S C6S C18S C1S -128(18) . . . 3_766 ?
C11S C6S C18S C1S -35(15) . . . 3_766 ?
C10S C6S C18S C1S 167(21) 3_766 . . 3_766 ?
C16S C6S C18S C1S -133(19) . . . 3_766 ?
C8S C6S C18S C1S -170(18) . . . 3_766 ?
C13S C6S C18S C1S -155(18) . . . 3_766 ?
C7S C6S C18S C1S -127(27) 3_766 . . 3_766 ?
C5S C6S C18S C1S 179(29) 3_766 . . 3_766 ?
C15S C6S C18S C7S 61(15) . . . 3_766 ?
C1S C6S C18S C7S 127(27) 3_766 . . 3_766 ?
C12S C6S C18S C7S -69(14) 3_766 . . 3_766 ?
C9S C6S C18S C7S 0(18) . . . 3_766 ?
C11S C6S C18S C7S 92(17) . . . 3_766 ?
C10S C6S C18S C7S -65(11) 3_766 . . 3_766 ?
C16S C6S C18S C7S -6(13) . . . 3_766 ?
C8S C6S C18S C7S -43(14) . . . 3_766 ?
C13S C6S C18S C7S -28(18) . . . 3_766 ?
C5S C6S C18S C7S -54(10) 3_766 . . 3_766 ?
C15S C6S C18S C5S 114(16) . . . 3_766 ?
C1S C6S C18S C5S -179(29) 3_766 . . 3_766 ?
C12S C6S C18S C5S -15(14) 3_766 . . 3_766 ?
C9S C6S C18S C5S 53(20) . . . 3_766 ?
C11S C6S C18S C5S 146(21) . . . 3_766 ?
C10S C6S C18S C5S -12(13) 3_766 . . 3_766 ?
C16S C6S C18S C5S 48(15) . . . 3_766 ?
C8S C6S C18S C5S 11(17) . . . 3_766 ?
C13S C6S C18S C5S 26(20) . . . 3_766 ?
C7S C6S C18S C5S 54(10) 3_766 . . 3_766 ?
C15S C6S C18S C12S 130(15) . . . 3_766 ?
C1S C6S C18S C12S -164(26) 3_766 . . 3_766 ?
C9S C6S C18S C12S 69(16) . . . 3_766 ?
C11S C6S C18S C12S 161(18) . . . 3_766 ?
C10S C6S C18S C12S 4(12) 3_766 . . 3_766 ?
C16S C6S C18S C12S 64(13) . . . 3_766 ?
C8S C6S C18S C12S 26(13) . . . 3_766 ?
C13S C6S C18S C12S 41(16) . . . 3_766 ?
C7S C6S C18S C12S 69(14) 3_766 . . 3_766 ?
C5S C6S C18S C12S 15(14) 3_766 . . 3_766 ?
C15S C6S C18S C11S -32(12) . . . . ?
C1S C6S C18S C11S 35(15) 3_766 . . . ?
C12S C6S C18S C11S -161(18) 3_766 . . . ?
C9S C6S C18S C11S -93(9) . . . . ?
C10S C6S C18S C11S -158(11) 3_766 . . . ?
C16S C6S C18S C11S -98(9) . . . . ?
C8S C6S C18S C11S -135(8) . . . . ?
C13S C6S C18S C11S -120(8) . . . . ?
C7S C6S C18S C11S -92(17) 3_766 . . . ?
C5S C6S C18S C11S -146(21) 3_766 . . . ?
C15S C6S C18S C17S 13(10) . . . 3_766 ?
C1S C6S C18S C17S 79(20) 3_766 . . 3_766 ?
C12S C6S C18S C17S -117(14) 3_766 . . 3_766 ?
C9S C6S C18S C17S -48(11) . . . 3_766 ?
C11S C6S C18S C17S 44(9) . . . 3_766 ?
C10S C6S C18S C17S -113(7) 3_766 . . 3_766 ?
C16S C6S C18S C17S -53(7) . . . 3_766 ?
C8S C6S C18S C17S -91(7) . . . 3_766 ?
C13S C6S C18S C17S -76(10) . . . 3_766 ?
C7S C6S C18S C17S -48(11) 3_766 . . 3_766 ?
C5S C6S C18S C17S -102(15) 3_766 . . 3_766 ?
C15S C6S C18S C10S 126(9) . . . 3_766 ?
C1S C6S C18S C10S -167(21) 3_766 . . 3_766 ?
C12S C6S C18S C10S -4(12) 3_766 . . 3_766 ?
C9S C6S C18S C10S 65(9) . . . 3_766 ?
C11S C6S C18S C10S 158(11) . . . 3_766 ?
C16S C6S C18S C10S 60(5) . . . 3_766 ?
C8S C6S C18S C10S 22(6) . . . 3_766 ?
C13S C6S C18S C10S 38(10) . . . 3_766 ?
C7S C6S C18S C10S 65(11) 3_766 . . 3_766 ?
C5S C6S C18S C10S 12(13) 3_766 . . 3_766 ?
C15S C6S C18S C3S 101(10) . . . 3_766 ?
C1S C6S C18S C3S 167(23) 3_766 . . 3_766 ?
C12S C6S C18S C3S -29(11) 3_766 . . 3_766 ?
C9S C6S C18S C3S 39(13) . . . 3_766 ?
C11S C6S C18S C3S 132(13) . . . 3_766 ?
C10S C6S C18S C3S -26(6) 3_766 . . 3_766 ?
C16S C6S C18S C3S 34(7) . . . 3_766 ?
C8S C6S C18S C3S -3(9) . . . 3_766 ?
C13S C6S C18S C3S 12(13) . . . 3_766 ?
C7S C6S C18S C3S 40(8) 3_766 . . 3_766 ?
C5S C6S C18S C3S -14(10) 3_766 . . 3_766 ?
C1S C6S C18S C15S 67(19) 3_766 . . . ?
C12S C6S C18S C15S -130(15) 3_766 . . . ?
C9S C6S C18S C15S -61(9) . . . . ?
C11S C6S C18S C15S 32(12) . . . . ?
C10S C6S C18S C15S -126(9) 3_766 . . . ?
C16S C6S C18S C15S -66(8) . . . . ?
C8S C6S C18S C15S -104(9) . . . . ?
C13S C6S C18S C15S -88(11) . . . . ?
C7S C6S C18S C15S -61(15) 3_766 . . . ?
C5S C6S C18S C15S -114(16) 3_766 . . . ?
C15S C6S C18S C16S 66(8) . . . . ?
C1S C6S C18S C16S 133(19) 3_766 . . . ?
C12S C6S C18S C16S -64(13) 3_766 . . . ?
C9S C6S C18S C16S 5(8) . . . . ?
C11S C6S C18S C16S 98(9) . . . . ?
C10S C6S C18S C16S -60(5) 3_766 . . . ?
C8S C6S C18S C16S -37(5) . . . . ?
C13S C6S C18S C16S -22(8) . . . . ?
C7S C6S C18S C16S 6(13) 3_766 . . . ?
C5S C6S C18S C16S -48(15) 3_766 . . . ?
C15S C6S C18S C14S 56(8) . . . 3_766 ?
C1S C6S C18S C14S 123(20) 3_766 . . 3_766 ?
C12S C6S C18S C14S -74(12) 3_766 . . 3_766 ?
C9S C6S C18S C14S -5(9) . . . 3_766 ?
C11S C6S C18S C14S 88(9) . . . 3_766 ?
C10S C6S C18S C14S -70(5) 3_766 . . 3_766 ?
C16S C6S C18S C14S -10(5) . . . 3_766 ?
C8S C6S C18S C14S -47(5) . . . 3_766 ?
C13S C6S C18S C14S -32(9) . . . 3_766 ?
C7S C6S C18S C14S -4(11) 3_766 . . 3_766 ?
C5S C6S C18S C14S -58(13) 3_766 . . 3_766 ?
C6S C15S C18S C1S 59(19) . . . 3_766 ?
C9S C15S C18S C1S 121(21) . . . 3_766 ?
C11S C15S C18S C1S -84(17) . . . 3_766 ?
C16S C15S C18S C1S 155(22) . . . 3_766 ?
C12S C15S C18S C1S 98(26) 3_766 . . 3_766 ?
C17S C15S C18S C1S -135(22) 3_766 . . 3_766 ?
C13S C15S C18S C1S 112(20) . . . 3_766 ?
C2S C15S C18S C1S 127(20) . . . 3_766 ?
C8S C15S C18S C1S 115(20) . . . 3_766 ?
C7S C15S C18S C1S -178(28) 3_766 . . 3_766 ?
C6S C15S C18S C7S -123(14) . . . 3_766 ?
C9S C15S C18S C7S -61(14) . . . 3_766 ?
C1S C15S C18S C7S 178(28) 3_766 . . 3_766 ?
C11S C15S C18S C7S 93(17) . . . 3_766 ?
C16S C15S C18S C7S -27(11) . . . 3_766 ?
C12S C15S C18S C7S -84(13) 3_766 . . 3_766 ?
C17S C15S C18S C7S 43(9) 3_766 . . 3_766 ?
C13S C15S C18S C7S -70(12) . . . 3_766 ?
C2S C15S C18S C7S -55(15) . . . 3_766 ?
C8S C15S C18S C7S -67(11) . . . 3_766 ?
C6S C15S C18S C5S -78(19) . . . 3_766 ?
C9S C15S C18S C5S -16(21) . . . 3_766 ?
C1S C15S C18S C5S -137(33) 3_766 . . 3_766 ?
C11S C15S C18S C5S 139(24) . . . 3_766 ?
C16S C15S C18S C5S 18(17) . . . 3_766 ?
C12S C15S C18S C5S -39(15) 3_766 . . 3_766 ?
C17S C15S C18S C5S 89(17) 3_766 . . 3_766 ?
C13S C15S C18S C5S -25(19) . . . 3_766 ?
C2S C15S C18S C5S -10(22) . . . 3_766 ?
C8S C15S C18S C5S -21(17) . . . 3_766 ?
C7S C15S C18S C5S 45(11) 3_766 . . 3_766 ?
C6S C15S C18S C12S -39(14) . . . 3_766 ?
C9S C15S C18S C12S 23(15) . . . 3_766 ?
C1S C15S C18S C12S -98(26) 3_766 . . 3_766 ?
C11S C15S C18S C12S 178(19) . . . 3_766 ?
C16S C15S C18S C12S 57(12) . . . 3_766 ?
C17S C15S C18S C12S 127(14) 3_766 . . 3_766 ?
C13S C15S C18S C12S 14(13) . . . 3_766 ?
C2S C15S C18S C12S 29(15) . . . 3_766 ?
C8S C15S C18S C12S 17(12) . . . 3_766 ?
C7S C15S C18S C12S 84(13) 3_766 . . 3_766 ?
C6S C15S C18S C11S 143(13) . . . . ?
C9S C15S C18S C11S -155(12) . . . . ?
C1S C15S C18S C11S 84(17) 3_766 . . . ?
C16S C15S C18S C11S -121(12) . . . . ?
C12S C15S C18S C11S -178(19) 3_766 . . . ?
C17S C15S C18S C11S -50(10) 3_766 . . . ?
C13S C15S C18S C11S -164(10) . . . . ?
C2S C15S C18S C11S -149(10) . . . . ?
C8S C15S C18S C11S -160(11) . . . . ?
C7S C15S C18S C11S -93(17) 3_766 . . . ?
C6S C15S C18S C17S -166(11) . . . 3_766 ?
C9S C15S C18S C17S -104(9) . . . 3_766 ?
C1S C15S C18S C17S 135(22) 3_766 . . 3_766 ?
C11S C15S C18S C17S 50(10) . . . 3_766 ?
C16S C15S C18S C17S -70(7) . . . 3_766 ?
C12S C15S C18S C17S -127(14) 3_766 . . 3_766 ?
C13S C15S C18S C17S -113(7) . . . 3_766 ?
C2S C15S C18S C17S -98(8) . . . 3_766 ?
C8S C15S C18S C17S -110(6) . . . 3_766 ?
C7S C15S C18S C17S -43(9) 3_766 . . 3_766 ?
C9S C15S C18S C6S 62(11) . . . . ?
C1S C15S C18S C6S -59(19) 3_766 . . . ?
C11S C15S C18S C6S -143(13) . . . . ?
C16S C15S C18S C6S 96(10) . . . . ?
C12S C15S C18S C6S 39(14) 3_766 . . . ?
C17S C15S C18S C6S 166(11) 3_766 . . . ?
C13S C15S C18S C6S 53(9) . . . . ?
C2S C15S C18S C6S 68(11) . . . . ?
C8S C15S C18S C6S 56(8) . . . . ?
C7S C15S C18S C6S 123(14) 3_766 . . . ?
C6S C15S C18S C10S -49(9) . . . 3_766 ?
C9S C15S C18S C10S 13(10) . . . 3_766 ?
C1S C15S C18S C10S -109(22) 3_766 . . 3_766 ?
C11S C15S C18S C10S 167(13) . . . 3_766 ?
C16S C15S C18S C10S 46(7) . . . 3_766 ?
C12S C15S C18S C10S -10(11) 3_766 . . 3_766 ?
C17S C15S C18S C10S 117(8) 3_766 . . 3_766 ?
C13S C15S C18S C10S 3(7) . . . 3_766 ?
C2S C15S C18S C10S 19(10) . . . 3_766 ?
C8S C15S C18S C10S 7(6) . . . 3_766 ?
C7S C15S C18S C10S 74(9) 3_766 . . 3_766 ?
C6S C15S C18S C3S -88(11) . . . 3_766 ?
C9S C15S C18S C3S -26(12) . . . 3_766 ?
C1S C15S C18S C3S -147(24) 3_766 . . 3_766 ?
C11S C15S C18S C3S 129(15) . . . 3_766 ?
C16S C15S C18S C3S 8(8) . . . 3_766 ?
C12S C15S C18S C3S -49(11) 3_766 . . 3_766 ?
C17S C15S C18S C3S 79(8) 3_766 . . 3_766 ?
C13S C15S C18S C3S -35(10) . . . 3_766 ?
C2S C15S C18S C3S -20(12) . . . 3_766 ?
C8S C15S C18S C3S -31(8) . . . 3_766 ?
C7S C15S C18S C3S 36(7) 3_766 . . 3_766 ?
C6S C15S C18S C16S -96(10) . . . . ?
C9S C15S C18S C16S -34(7) . . . . ?
C1S C15S C18S C16S -155(22) 3_766 . . . ?
C11S C15S C18S C16S 121(12) . . . . ?
C12S C15S C18S C16S -57(12) 3_766 . . . ?
C17S C15S C18S C16S 70(7) 3_766 . . . ?
C13S C15S C18S C16S -43(6) . . . . ?
C2S C15S C18S C16S -28(7) . . . . ?
C8S C15S C18S C16S -40(5) . . . . ?
C7S C15S C18S C16S 27(11) 3_766 . . . ?
C6S C15S C18S C14S -119(9) . . . 3_766 ?
C9S C15S C18S C14S -57(7) . . . 3_766 ?
C1S C15S C18S C14S -178(21) 3_766 . . 3_766 ?
C11S C15S C18S C14S 98(11) . . . 3_766 ?
C16S C15S C18S C14S -23(5) . . . 3_766 ?
C12S C15S C18S C14S -79(12) 3_766 . . 3_766 ?
C17S C15S C18S C14S 48(5) 3_766 . . 3_766 ?
C13S C15S C18S C14S -66(5) . . . 3_766 ?
C2S C15S C18S C14S -51(7) . . . 3_766 ?
C8S C15S C18S C14S -62(4) . . . 3_766 ?
C7S C15S C18S C14S 5(10) 3_766 . . 3_766 ?
C14S C16S C18S C1S -139(14) 3_766 . . 3_766 ?
C8S C16S C18S C1S -106(22) 3_766 . . 3_766 ?
C13S C16S C18S C1S -168(13) 3_766 . . 3_766 ?
C8S C16S C18S C1S 74(13) . . . 3_766 ?
C2S C16S C18S C1S 165(13) 3_766 . . 3_766 ?
C9S C16S C18S C1S 15(13) . . . 3_766 ?
C16S C16S C18S C1S 74(18) 3_766 . . 3_766 ?
C9S C16S C18S C1S 157(13) 3_766 . . 3_766 ?
C7S C16S C18S C1S -154(22) 3_766 . . 3_766 ?
C10S C16S C18S C1S 105(14) 3_766 . . 3_766 ?
C13S C16S C18S C1S 39(13) . . . 3_766 ?
C17S C16S C18S C1S -95(13) 3_766 . . 3_766 ?
C14S C16S C18S C7S 15(14) 3_766 . . 3_766 ?
C8S C16S C18S C7S 47(23) 3_766 . . 3_766 ?
C13S C16S C18S C7S -15(15) 3_766 . . 3_766 ?
C8S C16S C18S C7S -133(14) . . . 3_766 ?
C2S C16S C18S C7S -42(13) 3_766 . . 3_766 ?
C9S C16S C18S C7S 169(14) . . . 3_766 ?
C16S C16S C18S C7S -132(19) 3_766 . . 3_766 ?
C9S C16S C18S C7S -50(17) 3_766 . . 3_766 ?
C10S C16S C18S C7S -101(12) 3_766 . . 3_766 ?
C13S C16S C18S C7S -167(13) . . . 3_766 ?
C17S C16S C18S C7S 58(13) 3_766 . . 3_766 ?
C14S C16S C18S C5S 69(14) 3_766 . . 3_766 ?
C8S C16S C18S C5S 102(22) 3_766 . . 3_766 ?
C13S C16S C18S C5S 40(17) 3_766 . . 3_766 ?
C8S C16S C18S C5S -78(13) . . . 3_766 ?
C2S C16S C18S C5S 13(14) 3_766 . . 3_766 ?
C9S C16S C18S C5S -137(13) . . . 3_766 ?
C16S C16S C18S C5S -78(18) 3_766 . . 3_766 ?
C9S C16S C18S C5S 5(18) 3_766 . . 3_766 ?
C7S C16S C18S C5S 55(10) 3_766 . . 3_766 ?
C10S C16S C18S C5S -46(11) 3_766 . . 3_766 ?
C13S C16S C18S C5S -112(13) . . . 3_766 ?
C17S C16S C18S C5S 113(15) 3_766 . . 3_766 ?
C14S C16S C18S C12S 140(14) 3_766 . . 3_766 ?
C8S C16S C18S C12S 173(22) 3_766 . . 3_766 ?
C13S C16S C18S C12S 111(15) 3_766 . . 3_766 ?
C8S C16S C18S C12S -7(13) . . . 3_766 ?
C2S C16S C18S C12S 84(13) 3_766 . . 3_766 ?
C9S C16S C18S C12S -66(13) . . . 3_766 ?
C16S C16S C18S C12S -7(18) 3_766 . . 3_766 ?
C9S C16S C18S C12S 76(16) 3_766 . . 3_766 ?
C7S C16S C18S C12S 126(18) 3_766 . . 3_766 ?
C10S C16S C18S C12S 24(11) 3_766 . . 3_766 ?
C13S C16S C18S C12S -42(13) . . . 3_766 ?
C17S C16S C18S C12S -176(16) 3_766 . . 3_766 ?
C14S C16S C18S C11S -79(13) 3_766 . . . ?
C8S C16S C18S C11S -46(23) 3_766 . . . ?
C13S C16S C18S C11S -108(13) 3_766 . . . ?
C8S C16S C18S C11S 134(12) . . . . ?
C2S C16S C18S C11S -135(12) 3_766 . . . ?
C9S C16S C18S C11S 75(12) . . . . ?
C16S C16S C18S C11S 134(17) 3_766 . . . ?
C9S C16S C18S C11S -143(12) 3_766 . . . ?
C7S C16S C18S C11S -93(19) 3_766 . . . ?
C10S C16S C18S C11S 165(14) 3_766 . . . ?
C13S C16S C18S C11S 99(12) . . . . ?
C17S C16S C18S C11S -35(10) 3_766 . . . ?
C14S C16S C18S C17S -44(10) 3_766 . . 3_766 ?
C8S C16S C18S C17S -11(20) 3_766 . . 3_766 ?
C13S C16S C18S C17S -73(11) 3_766 . . 3_766 ?
C8S C16S C18S C17S 169(9) . . . 3_766 ?
C2S C16S C18S C17S -100(9) 3_766 . . 3_766 ?
C9S C16S C18S C17S 110(8) . . . 3_766 ?
C16S C16S C18S C17S 169(15) 3_766 . . 3_766 ?
C9S C16S C18S C17S -108(12) 3_766 . . 3_766 ?
C7S C16S C18S C17S -58(13) 3_766 . . 3_766 ?
C10S C16S C18S C17S -159(10) 3_766 . . 3_766 ?
C13S C16S C18S C17S 135(8) . . . 3_766 ?
C14S C16S C18S C6S -158(10) 3_766 . . . ?
C8S C16S C18S C6S -126(20) 3_766 . . . ?
C13S C16S C18S C6S 172(11) 3_766 . . . ?
C8S C16S C18S C6S 55(7) . . . . ?
C2S C16S C18S C6S 145(9) 3_766 . . . ?
C9S C16S C18S C6S -4(7) . . . . ?
C16S C16S C18S C6S 55(14) 3_766 . . . ?
C9S C16S C18S C6S 137(12) 3_766 . . . ?
C7S C16S C18S C6S -173(17) 3_766 . . . ?
C10S C16S C18S C6S 86(9) 3_766 . . . ?
C13S C16S C18S C6S 20(7) . . . . ?
C17S C16S C18S C6S -114(8) 3_766 . . . ?
C14S C16S C18S C10S 116(9) 3_766 . . 3_766 ?
C8S C16S C18S C10S 148(20) 3_766 . . 3_766 ?
C13S C16S C18S C10S 86(10) 3_766 . . 3_766 ?
C8S C16S C18S C10S -32(8) . . . 3_766 ?
C2S C16S C18S C10S 59(7) 3_766 . . 3_766 ?
C9S C16S C18S C10S -90(8) . . . 3_766 ?
C16S C16S C18S C10S -31(14) 3_766 . . 3_766 ?
C9S C16S C18S C10S 51(11) 3_766 . . 3_766 ?
C7S C16S C18S C10S 101(12) 3_766 . . 3_766 ?
C13S C16S C18S C10S -66(7) . . . 3_766 ?
C17S C16S C18S C10S 159(10) 3_766 . . 3_766 ?
C14S C16S C18S C3S 62(8) 3_766 . . 3_766 ?
C8S C16S C18S C3S 94(20) 3_766 . . 3_766 ?
C13S C16S C18S C3S 32(10) 3_766 . . 3_766 ?
C8S C16S C18S C3S -85(8) . . . 3_766 ?
C2S C16S C18S C3S 5(7) 3_766 . . 3_766 ?
C9S C16S C18S C3S -144(9) . . . 3_766 ?
C16S C16S C18S C3S -85(15) 3_766 . . 3_766 ?
C9S C16S C18S C3S -3(12) 3_766 . . 3_766 ?
C7S C16S C18S C3S 47(11) 3_766 . . 3_766 ?
C10S C16S C18S C3S -54(6) 3_766 . . 3_766 ?
C13S C16S C18S C3S -120(8) . . . 3_766 ?
C17S C16S C18S C3S 106(9) 3_766 . . 3_766 ?
C14S C16S C18S C15S -127(10) 3_766 . . . ?
C8S C16S C18S C15S -95(19) 3_766 . . . ?
C13S C16S C18S C15S -157(12) 3_766 . . . ?
C8S C16S C18S C15S 86(8) . . . . ?
C2S C16S C18S C15S 176(10) 3_766 . . . ?
C9S C16S C18S C15S 27(6) . . . . ?
C16S C16S C18S C15S 86(15) 3_766 . . . ?
C9S C16S C18S C15S 168(13) 3_766 . . . ?
C7S C16S C18S C15S -142(16) 3_766 . . . ?
C10S C16S C18S C15S 117(9) 3_766 . . . ?
C13S C16S C18S C15S 51(7) . . . . ?
C17S C16S C18S C15S -84(8) 3_766 . . . ?
C8S C16S C18S C14S 33(18) 3_766 . . 3_766 ?
C13S C16S C18S C14S -30(7) 3_766 . . 3_766 ?
C8S C16S C18S C14S -147(11) . . . 3_766 ?
C2S C16S C18S C14S -56(6) 3_766 . . 3_766 ?
C9S C16S C18S C14S 154(11) . . . 3_766 ?
C16S C16S C18S C14S -147(18) 3_766 . . 3_766 ?
C9S C16S C18S C14S -65(9) 3_766 . . 3_766 ?
C7S C16S C18S C14S -15(14) 3_766 . . 3_766 ?
C10S C16S C18S C14S -116(9) 3_766 . . 3_766 ?
C13S C16S C18S C14S 178(11) . . . 3_766 ?
C17S C16S C18S C14S 44(10) 3_766 . . 3_766 ?
 
_diffrn_measured_fraction_theta_max    0.957
_diffrn_reflns_theta_full              25.15
_diffrn_measured_fraction_theta_full   0.957
_refine_diff_density_max    0.282
_refine_diff_density_min   -0.258
_refine_diff_density_rms    0.072

#===END
